# Supplementary material for: Decoupling of evolutionary changes in transcription factor binding and gene expression in mammals
Source: Genome Res. 2015 Feb;25(2):167–78. doi: 10.1101/gr.177840.114 (PMC4315291; doi:10.1101/gr.177840.114)
Supplement: Supplemental Material [file supp_gr.177840.114_Supplemental_Data.xlsx]

## Sheet: raw_counts
Gene expression values
gene_id	b1	b2	b3	cast1	cast2	cast3	s1	s3	s4	car3	car4	car5	car6
ENSMUSG00000000001	1410	924	1463	886	1045	1194	661	770	1441	473	789	885	1164
ENSMUSG00000000003	0	0	0	0	0	0	0	0	0	0	0	0	0
ENSMUSG00000000028	22	9	11	15	15	12	16	7	11	10	11	13	13
ENSMUSG00000000037	0	0	0	0	2	0	8	1	2	0	0	0	0
ENSMUSG00000000049	4267	4426	6015	3896	2674	3296	2468	7800	6482	4226	11029	5761	8137
ENSMUSG00000000056	641	461	574	1372	815	972	313	308	879	411	839	564	396
ENSMUSG00000000058	76	36	52	39	29	38	20	34	63	13	29	30	38
ENSMUSG00000000078	132	81	130	66	72	40	129	101	171	102	353	230	291
ENSMUSG00000000085	129	151	137	115	73	84	115	98	159	84	148	71	101
ENSMUSG00000000088	512	628	505	421	292	335	331	525	505	1208	1269	626	1006
ENSMUSG00000000093	22	38	47	53	18	18	48	37	32	37	71	16	16
ENSMUSG00000000094	0	0	0	0	0	0	0	0	0	0	0	0	2
ENSMUSG00000000103	0	0	0	0	0	0	0	0	0	0	0	0	0
ENSMUSG00000000120	87	55	79	69	57	81	95	120	127	134	179	118	181
ENSMUSG00000000125	0	0	0	0	1	0	0	0	2	0	0	0	0
ENSMUSG00000000126	12	11	8	8	6	3	3	4	5	0	8	2	1
ENSMUSG00000000127	63	81	88	64	66	69	50	54	109	16	30	38	30
ENSMUSG00000000131	582	428	529	939	580	714	498	567	965	679	1065	484	537
ENSMUSG00000000134	416	413	435	291	183	247	381	488	711	235	381	184	262
ENSMUSG00000000142	76	92	149	134	98	130	120	189	221	200	389	122	146
ENSMUSG00000000148	144	131	142	195	105	137	181	242	297	142	208	112	163
ENSMUSG00000000149	1786	1424	1815	2530	1336	1515	888	747	1465	233	444	271	294
ENSMUSG00000000154	1450	1423	1451	1947	1100	1239	1342	2046	2385	3182	7085	3446	3967
ENSMUSG00000000157	14	16	7	31	73	53	0	0	0	1	9	5	10
ENSMUSG00000000159	157	138	174	151	153	143	40	56	74	77	171	137	187
ENSMUSG00000000167	3	3	5	4	1	5	4	3	8	3	9	0	4
ENSMUSG00000000168	962	675	878	348	372	321	692	735	1356	271	501	342	361
ENSMUSG00000000171	3009	2919	3396	2119	1587	1940	1376	2058	3237	1544	2940	2050	3142
ENSMUSG00000000182	0	0	0	0	0	0	0	1	0	0	0	0	0
ENSMUSG00000000183	0	0	0	0	0	0	0	0	0	0	0	0	0
ENSMUSG00000000184	112	72	126	82	111	99	50	82	141	35	60	55	50
ENSMUSG00000000194	307	244	276	481	345	411	296	324	624	429	651	399	479
ENSMUSG00000000197	0	0	0	0	0	1	0	0	0	0	1	1	0
ENSMUSG00000000202	0	0	0	0	0	0	0	0	0	0	0	0	0
ENSMUSG00000000204	0	1	1	1	1	2	7	1	2	9	15	12	20
ENSMUSG00000000214	0	0	0	0	0	0	0	0	0	0	0	0	0
ENSMUSG00000000215	0	0	0	0	0	0	0	0	0	0	0	0	0
ENSMUSG00000000216	4	0	1	0	0	0	0	0	0	0	6	6	3
ENSMUSG00000000223	0	0	1	0	2	0	0	0	0	0	2	0	0
ENSMUSG00000000244	4	0	8	3	2	2	0	2	5	2	1	3	3
ENSMUSG00000000247	28	15	22	45	18	11	29	27	24	44	65	22	20
ENSMUSG00000000248	0	0	2	4	21	9	10	6	5	0	0	0	0
ENSMUSG00000000253	8	10	2	7	6	7	18	5	20	10	11	12	15
ENSMUSG00000000263	0	0	0	0	0	0	0	0	0	0	0	0	0
ENSMUSG00000000266	76	54	91	44	94	79	15	37	55	46	53	49	66
ENSMUSG00000000275	1465	1021	1458	943	957	1067	742	1218	2153	490	728	591	1014
ENSMUSG00000000276	41	34	43	28	26	27	20	29	63	16	15	36	35
ENSMUSG00000000278	635	565	608	238	208	281	658	563	940	441	707	520	640
ENSMUSG00000000282	139	148	107	187	92	102	209	180	256	356	620	240	185
ENSMUSG00000000290	45	23	56	24	18	13	11	39	36	50	50	51	83
ENSMUSG00000000295	8	15	14	22	18	19	36	21	68	16	30	16	19
ENSMUSG00000000296	105	94	90	83	53	35	92	137	125	10	21	5	13
ENSMUSG00000000301	2777	2801	2767	2542	1794	1767	1672	1760	3380	1373	2640	1699	2139
ENSMUSG00000000303	738	866	812	537	671	815	779	631	583	532	969	581	1125
ENSMUSG00000000305	13	13	7	22	17	20	0	0	0	26	32	14	19
ENSMUSG00000000308	1	3	0	1	1	0	0	0	4	1	3	1	0
ENSMUSG00000000317	49	36	45	14	12	14	20	33	41	7	24	4	20
ENSMUSG00000000318	1	0	1	0	2	0	0	9	9	8	9	7	8
ENSMUSG00000000320	7	11	13	4	9	4	0	3	5	24	31	12	29
ENSMUSG00000000325	851	982	634	1503	1143	1378	293	244	418	254	483	420	385
ENSMUSG00000000326	11377	9456	8522	10274	7837	8969	16476	18058	26567	1591	3314	1953	1793
ENSMUSG00000000339	47	35	51	42	54	45	65	39	101	64	99	82	99
ENSMUSG00000000340	1092	810	1030	730	646	836	288	390	668	560	983	658	1110
ENSMUSG00000000346	2175	1840	2322	1022	802	978	934	1549	2347	1192	2388	1226	1441
ENSMUSG00000000355	327	272	339	121	152	198	111	189	274	143	270	269	333
ENSMUSG00000000359	6	4	3	7	2	4	4	10	4	4	3	1	1
ENSMUSG00000000365	0	0	0	0	0	0	0	0	0	0	0	0	0
ENSMUSG00000000374	349	253	279	384	341	404	309	488	648	331	764	394	540
ENSMUSG00000000378	254	234	249	218	175	219	222	240	374	242	379	298	304
ENSMUSG00000000381	0	0	0	0	1	0	0	2	0	0	0	0	0
ENSMUSG00000000384	456	348	425	601	299	365	521	461	656	468	927	548	583
ENSMUSG00000000385	37	45	37	37	60	75	93	60	94	203	384	241	518
ENSMUSG00000000386	12	33	31	11	21	13	97	94	196	62	93	64	177
ENSMUSG00000000392	0	0	0	8	6	8	1	5	14	0	1	0	0
ENSMUSG00000000394	0	0	0	0	0	0	0	0	0	0	0	0	0
ENSMUSG00000000399	916	736	941	1020	695	941	660	503	1344	393	706	650	802
ENSMUSG00000000402	0	1	0	0	1	0	0	0	0	223	360	134	168
ENSMUSG00000000409	7	1	6	7	2	2	0	5	13	4	4	14	16
ENSMUSG00000000411	1	0	0	0	1	0	0	0	2	1	0	0	0
ENSMUSG00000000416	7	1	4	5	8	7	11	1	4	21	34	29	35
ENSMUSG00000000420	579	351	538	305	351	359	579	646	1422	171	325	370	504
ENSMUSG00000000435	0	0	0	0	1	0	0	0	0	0	0	0	0
ENSMUSG00000000439	173	152	183	190	108	135	175	191	270	137	269	160	185
ENSMUSG00000000440	271	114	134	1	36	3	109	132	183	112	209	86	104
ENSMUSG00000000441	1455	947	1275	1078	900	1110	1017	1216	2326	606	1163	868	1034
ENSMUSG00000000486	10	12	17	12	2	2	3	7	8	22	11	17	21
ENSMUSG00000000489	17	12	11	36	18	24	10	14	19	16	20	22	15
ENSMUSG00000000530	46	42	57	67	44	51	23	37	43	19	22	16	21
ENSMUSG00000000531	16	20	11	13	5	10	5	21	16	12	10	6	8
ENSMUSG00000000532	188	162	150	373	226	207	113	145	251	109	197	130	148
ENSMUSG00000000538	709	572	677	627	416	406	521	517	900	450	921	394	507
ENSMUSG00000000544	0	0	0	0	0	0	0	0	0	0	0	0	0
ENSMUSG00000000552	262	421	376	100	82	87	324	291	248	257	447	131	232
ENSMUSG00000000555	305	329	410	190	228	283	344	404	623	330	306	170	408
ENSMUSG00000000560	0	0	0	0	0	0	0	0	0	0	0	0	0
ENSMUSG00000000561	94	62	86	107	90	90	83	72	118	53	94	74	81
ENSMUSG00000000562	2	1	0	0	0	1	0	0	0	0	0	0	1
ENSMUSG00000000563	2199	2018	2261	794	643	799	1078	1299	2226	757	1206	864	1137
ENSMUSG00000000567	94	127	126	30	44	47	171	336	211	35	27	17	28
ENSMUSG00000000568	493	540	518	317	292	293	315	263	505	187	305	214	281
ENSMUSG00000000579	0	0	0	0	0	0	0	0	0	1	2	0	0
ENSMUSG00000000581	694	504	703	229	263	285	212	256	535	50	70	79	121
ENSMUSG00000000594	3463	4220	3860	1583	1176	1196	715	1021	1496	8295	16690	7393	9032
ENSMUSG00000000600	192	119	191	81	134	133	102	108	192	32	38	36	83
ENSMUSG00000000605	967	672	897	480	555	624	142	128	326	120	234	237	330
ENSMUSG00000000606	0	0	0	0	0	0	0	0	0	0	0	0	0
ENSMUSG00000000617	0	0	0	0	0	0	0	0	0	0	0	0	0
ENSMUSG00000000627	4	0	2	2	0	0	20	25	47	0	0	0	0
ENSMUSG00000000628	10	3	13	2	3	1	3	3	15	2	3	3	2
ENSMUSG00000000631	992	834	725	1226	806	979	541	656	867	465	984	566	492
ENSMUSG00000000632	0	0	0	6	4	3	0	0	0	6	5	1	4
ENSMUSG00000000673	6054	6433	5632	2792	1719	1849	6043	9790	10930	4067	8191	4247	5651
ENSMUSG00000000682	12	7	17	3	1	0	7	15	8	6	4	7	8
ENSMUSG00000000686	9	4	8	13	14	9	19	11	19	60	114	44	75
ENSMUSG00000000690	0	3	7	2	3	0	1	2	4	3	7	4	1
ENSMUSG00000000693	27	16	34	16	9	18	20	18	30	7	21	9	6
ENSMUSG00000000701	0	0	0	0	0	0	0	0	0	0	0	0	0
ENSMUSG00000000706	0	0	0	0	0	0	0	0	0	0	0	0	0
ENSMUSG00000000708	1028	726	998	529	578	669	382	430	724	258	433	360	510
ENSMUSG00000000711	1059	908	1178	787	612	712	586	545	942	396	860	487	555
ENSMUSG00000000724	0	0	0	1	1	1	0	0	0	0	1	2	0
ENSMUSG00000000730	0	0	0	0	0	0	0	0	0	0	0	0	0
ENSMUSG00000000731	0	0	0	0	0	0	0	0	0	0	0	0	0
ENSMUSG00000000732	5	9	9	9	9	9	0	6	4	7	3	6	9
ENSMUSG00000000738	494	338	404	445	275	376	370	359	656	417	794	635	861
ENSMUSG00000000739	98	142	142	29	45	11	832	1191	4842	0	3	4	0
ENSMUSG00000000740	82	142	53	2	0	0	3	4	1	350	425	328	526
ENSMUSG00000000743	944	709	758	842	372	518	651	608	1040	114	203	131	197
ENSMUSG00000000751	477	411	502	280	282	307	357	383	729	46	89	75	79
ENSMUSG00000000753	9257	8632	8579	6840	4494	5284	6108	5823	9623	10793	17890	9967	12117
ENSMUSG00000000759	180	139	160	140	166	149	185	125	241	80	112	63	105
ENSMUSG00000000766	0	0	0	0	0	0	0	0	0	0	0	0	0
ENSMUSG00000000776	71	67	85	120	55	71	46	78	149	42	99	91	92
ENSMUSG00000000782	53	48	43	29	34	22	45	71	114	34	32	19	13
ENSMUSG00000000787	2246	1423	2048	1248	1985	2208	818	1257	1717	531	937	886	1354
ENSMUSG00000000791	11	12	11	17	5	9	15	21	21	17	20	23	16
ENSMUSG00000000792	0	0	0	0	0	0	0	0	0	0	1	0	0
ENSMUSG00000000794	0	0	0	2	1	0	0	0	3	0	0	0	0
ENSMUSG00000000804	375	238	322	153	286	292	183	204	339	104	246	226	251
ENSMUSG00000000805	0	0	0	0	0	0	0	0	0	8	16	9	9
ENSMUSG00000000811	135	108	88	175	107	128	132	94	253	44	41	70	55
ENSMUSG00000000817	1	1	4	1	0	0	0	1	2	3	1	1	3
ENSMUSG00000000823	557	365	437	655	553	571	280	495	829	372	593	418	487
ENSMUSG00000000826	976	702	925	752	744	785	690	951	1630	278	409	382	511
ENSMUSG00000000827	381	325	317	273	230	265	184	336	377	259	479	330	389
ENSMUSG00000000838	273	231	298	147	157	159	155	134	295	50	113	106	129
ENSMUSG00000000861	2	3	1	2	0	1	3	1	1	0	2	1	1
ENSMUSG00000000869	9	0	1	1	0	3	0	1	7	6	1	1	3
ENSMUSG00000000876	1557	1200	1156	843	857	1197	1248	1573	2020	585	1038	691	1343
ENSMUSG00000000881	270	254	260	161	167	187	130	112	230	138	197	119	116
ENSMUSG00000000884	31	25	20	66	33	30	67	86	112	2	26	4	10
ENSMUSG00000000889	0	0	0	0	0	0	0	0	1	0	0	0	0
ENSMUSG00000000901	13	15	12	15	5	9	3	10	3	2	12	2	2
ENSMUSG00000000902	249	282	301	265	167	196	205	239	365	263	439	261	403
ENSMUSG00000000903	2	4	0	1	0	1	0	2	0	0	1	0	0
ENSMUSG00000000915	342	253	207	174	114	137	263	306	341	103	146	108	204
ENSMUSG00000000916	114	87	100	124	73	99	328	231	509	66	125	85	104
ENSMUSG00000000934	294	299	283	262	205	289	212	189	284	155	349	198	291
ENSMUSG00000000938	0	0	0	0	0	0	0	0	0	0	0	0	0
ENSMUSG00000000942	0	4	6	4	1	6	3	6	5	5	17	9	10
ENSMUSG00000000948	30	47	57	69	56	54	73	67	151	106	161	85	119
ENSMUSG00000000957	314	362	315	179	118	157	53	97	82	26	43	14	11
ENSMUSG00000000958	46	23	24	26	22	35	43	41	79	10	20	15	25
ENSMUSG00000000959	662	619	626	780	395	478	522	581	856	661	919	408	549
ENSMUSG00000000976	211	174	229	213	243	242	211	279	417	172	305	151	183
ENSMUSG00000000982	2	1	2	0	0	0	0	5	0	3	0	0	0
ENSMUSG00000000983	0	0	3	1	0	0	0	0	0	0	0	0	0
ENSMUSG00000001014	0	0	0	0	0	0	0	0	0	0	0	0	0
ENSMUSG00000001016	182	169	179	128	104	124	118	94	242	45	82	59	72
ENSMUSG00000001017	659	584	691	306	280	361	259	295	583	166	337	228	316
ENSMUSG00000001018	279	224	253	185	105	130	250	257	433	38	68	53	63
ENSMUSG00000001020	5	3	6	3	0	2	0	5	4	1	1	2	2
ENSMUSG00000001021	0	0	0	0	0	0	0	0	0	0	0	0	0
ENSMUSG00000001023	0	0	0	0	0	0	0	0	0	0	0	0	0
ENSMUSG00000001025	19	21	16	25	7	3	15	35	14	4	40	10	12
ENSMUSG00000001027	0	1	0	3	0	1	0	0	1	0	0	0	0
ENSMUSG00000001029	37	18	28	12	17	9	5	13	10	39	64	11	21
ENSMUSG00000001034	35	17	36	26	16	19	38	53	45	29	35	14	22
ENSMUSG00000001036	126	92	92	131	97	100	116	103	127	54	114	72	103
ENSMUSG00000001039	3	3	1	9	7	3	13	15	25	8	18	11	8
ENSMUSG00000001052	351	237	320	247	223	240	136	298	372	165	262	146	194
ENSMUSG00000001053	69	53	46	28	20	35	32	20	30	4	7	2	8
ENSMUSG00000001054	144	148	177	223	133	164	162	133	226	80	131	102	144
ENSMUSG00000001056	222	275	169	202	120	108	101	108	177	143	175	128	159
ENSMUSG00000001065	196	166	181	193	122	201	92	146	134	146	221	149	149
ENSMUSG00000001076	2	2	0	9	2	11	9	3	4	0	0	1	1
ENSMUSG00000001082	57	60	46	48	23	36	54	63	64	48	103	38	40
ENSMUSG00000001089	231	170	242	163	215	240	185	214	328	93	85	94	214
ENSMUSG00000001095	14	12	16	5	7	7	7	4	5	0	0	0	2
ENSMUSG00000001098	108	63	105	105	70	80	116	134	129	89	177	89	93
ENSMUSG00000001100	1006	1046	1084	904	623	745	897	734	1328	770	1463	742	858
ENSMUSG00000001103	12	24	13	3	8	5	9	7	17	0	12	5	6
ENSMUSG00000001105	403	430	392	230	200	239	341	351	574	386	660	472	616
ENSMUSG00000001119	117	99	83	128	55	60	88	170	124	39	141	42	59
ENSMUSG00000001120	17	7	13	8	9	9	16	5	8	10	8	4	4
ENSMUSG00000001123	8588	9061	9532	6019	4898	5243	7661	15937	14904	3142	5604	2450	4868
ENSMUSG00000001127	777	804	869	1229	703	927	608	649	978	604	1195	649	764
ENSMUSG00000001128	163	89	187	174	90	81	78	136	161	148	146	139	205
ENSMUSG00000001131	3	1	1	1	0	0	11	12	9	3	15	4	10
ENSMUSG00000001134	4	0	2	1	2	3	0	0	5	0	4	8	3
ENSMUSG00000001138	325	240	266	227	157	240	301	256	402	97	192	107	107
ENSMUSG00000001143	223	169	209	134	164	213	159	117	339	71	79	48	76
ENSMUSG00000001150	309	220	255	278	261	306	178	174	379	152	236	174	199
ENSMUSG00000001151	161	157	113	149	146	147	58	101	119	69	148	91	118
ENSMUSG00000001155	7167	7905	8151	8389	5261	7790	3574	4639	5844	6132	14653	6601	7759
ENSMUSG00000001156	126	86	71	111	65	94	86	88	126	71	137	59	76
ENSMUSG00000001157	156	153	185	90	102	119	151	181	381	96	183	137	178
ENSMUSG00000001158	158	247	159	64	59	59	92	106	92	228	328	125	229
ENSMUSG00000001166	12	16	12	11	10	6	0	1	0	0	0	0	0
ENSMUSG00000001168	1	0	0	0	1	2	0	0	0	1	2	0	1
ENSMUSG00000001173	84	52	76	73	77	93	23	33	69	46	56	46	65
ENSMUSG00000001175	3107	2378	2855	1579	1733	1805	2493	2457	4429	1221	2330	1682	2393
ENSMUSG00000001211	3351	2986	3225	2877	2056	2299	2752	2953	4299	2126	4020	2151	2337
ENSMUSG00000001225	0	0	0	0	1	0	0	0	0	0	0	0	0
ENSMUSG00000001227	72	80	30	65	42	34	95	71	53	24	41	22	16
ENSMUSG00000001228	6	1	5	6	3	3	10	12	14	2	4	2	5
ENSMUSG00000001229	711	500	570	422	374	448	729	670	835	320	604	303	505
ENSMUSG00000001240	13	0	6	12	4	3	4	16	10	5	16	13	12
ENSMUSG00000001247	1427	1326	1310	1057	758	910	1031	1299	888	1306	2547	1202	1458
ENSMUSG00000001248	158	106	135	212	105	155	146	114	137	127	219	100	111
ENSMUSG00000001249	4796	4691	3940	5820	2569	3482	5138	4362	6822	2553	5153	3360	3949
ENSMUSG00000001260	0	0	0	0	0	0	20	13	23	0	0	1	0
ENSMUSG00000001270	32	23	18	21	11	6	22	22	39	9	24	2	12
ENSMUSG00000001280	544	463	536	365	627	551	188	298	557	333	578	463	577
ENSMUSG00000001281	25	6	5	37	13	17	0	9	7	6	12	23	25
ENSMUSG00000001285	155	160	147	184	105	121	217	184	347	68	107	117	162
ENSMUSG00000001288	93	123	98	55	43	20	79	55	70	64	113	57	63
ENSMUSG00000001289	149	192	163	110	61	95	133	156	284	141	320	140	154
ENSMUSG00000001300	30	29	42	52	62	82	34	50	53	8	37	20	22
ENSMUSG00000001305	108	75	83	82	47	54	59	72	143	74	131	97	120
ENSMUSG00000001313	205	195	172	213	153	188	116	140	388	2	6	8	1
ENSMUSG00000001323	1014	884	1107	310	420	376	80	147	205	87	199	96	138
ENSMUSG00000001333	2	0	0	3	0	0	1	2	0	5	12	2	6
ENSMUSG00000001334	1	11	13	8	12	7	0	1	0	0	0	0	2
ENSMUSG00000001348	1483	1392	1445	465	479	419	1581	1337	2083	1649	2990	1744	2281
ENSMUSG00000001349	1	1	1	7	1	2	0	3	2	3	116	2	3
ENSMUSG00000001366	737	592	736	795	547	707	837	843	1653	337	510	316	502
ENSMUSG00000001376	126	117	125	83	74	100	90	73	154	65	83	94	131
ENSMUSG00000001379	198	139	163	233	133	169	347	385	486	135	290	223	166
ENSMUSG00000001380	360	334	374	273	221	250	201	184	395	181	326	247	323
ENSMUSG00000001383	632	691	530	408	268	361	227	291	725	256	520	371	393
ENSMUSG00000001403	4	1	3	2	6	3	0	2	4	75	121	33	60
ENSMUSG00000001415	485	430	390	447	312	438	330	421	553	227	399	234	296
ENSMUSG00000001416	998	722	985	663	624	755	588	647	1205	344	687	568	760
ENSMUSG00000001417	95	62	67	41	31	34	210	208	329	170	273	158	263
ENSMUSG00000001418	779	737	653	556	313	340	430	688	655	448	824	480	616
ENSMUSG00000001419	552	467	549	469	340	480	258	464	438	745	991	364	528
ENSMUSG00000001420	11	9	6	7	9	8	8	8	9	10	16	6	4
ENSMUSG00000001424	881	607	719	637	470	545	445	507	725	325	593	376	411
ENSMUSG00000001435	9167	9156	8211	7651	4005	5012	7976	6052	9706	5036	10133	5380	5370
ENSMUSG00000001436	61	43	60	18	34	57	21	62	91	19	39	33	41
ENSMUSG00000001440	1609	1201	1624	1221	1576	1753	1014	1203	2501	552	960	869	920
ENSMUSG00000001441	417	347	387	215	202	264	173	219	367	201	307	193	196
ENSMUSG00000001444	6	2	1	0	0	0	0	3	2	4	5	8	16
ENSMUSG00000001445	687	564	642	582	415	488	627	578	906	1078	1554	742	958
ENSMUSG00000001467	3226	2795	3363	1166	1855	1566	2759	2972	5750	1036	1720	1898	1983
ENSMUSG00000001472	1624	1262	1320	1407	970	1146	1292	1387	2218	1015	1870	1267	1415
ENSMUSG00000001473	107	81	72	237	214	193	468	688	787	111	257	121	125
ENSMUSG00000001482	583	539	628	300	215	231	447	455	815	416	644	503	657
ENSMUSG00000001493	6	1	3	1	0	0	0	0	0	0	0	0	0
ENSMUSG00000001494	2	0	1	0	0	1	0	0	0	47	76	42	53
ENSMUSG00000001496	0	0	0	0	0	0	1	0	0	0	0	0	0
ENSMUSG00000001497	3	2	6	8	6	8	0	5	10	0	0	0	0
ENSMUSG00000001504	0	0	0	0	0	0	0	0	0	0	0	0	0
ENSMUSG00000001506	102	132	54	143	24	27	141	380	172	28	158	23	32
ENSMUSG00000001507	141	142	116	103	73	97	114	106	186	57	131	51	61
ENSMUSG00000001508	0	0	0	0	0	0	0	0	1	0	4	1	0
ENSMUSG00000001510	0	0	0	0	0	0	0	0	0	0	0	0	0
ENSMUSG00000001517	10	3	11	7	6	7	15	24	36	6	6	8	14
ENSMUSG00000001518	116	105	142	86	63	65	94	95	166	94	206	132	150
ENSMUSG00000001520	1	4	0	6	7	8	6	4	1	10	24	16	11
ENSMUSG00000001521	18	20	24	14	14	10	62	45	64	6	11	9	7
ENSMUSG00000001524	168	134	160	138	66	109	131	116	117	71	139	97	136
ENSMUSG00000001525	1432	1292	1352	822	662	745	1106	1421	2211	789	1455	680	1178
ENSMUSG00000001542	954	674	1126	772	814	963	273	367	698	290	401	290	522
ENSMUSG00000001552	719	790	778	742	409	450	541	431	597	1187	2193	939	1061
ENSMUSG00000001555	12	19	14	25	9	4	14	22	9	1	12	1	3
ENSMUSG00000001558	1	0	1	6	2	3	0	0	0	2	2	0	0
ENSMUSG00000001566	0	0	0	0	0	0	0	0	0	0	0	0	0
ENSMUSG00000001569	271	246	244	197	203	205	156	190	324	182	238	211	246
ENSMUSG00000001576	1585	1278	1447	1265	906	980	1306	1389	2339	881	1867	922	1239
ENSMUSG00000001583	0	1	1	0	2	0	0	1	3	4	12	2	2
ENSMUSG00000001588	45	17	24	31	13	26	24	32	50	15	11	16	20
ENSMUSG00000001604	554	592	558	199	153	156	646	334	624	293	558	395	426
ENSMUSG00000001622	0	0	0	0	0	0	0	0	0	0	0	0	0
ENSMUSG00000001627	15	11	20	17	14	22	57	43	50	17	16	16	14
ENSMUSG00000001630	366	217	293	86	111	131	162	243	594	18	48	43	45
ENSMUSG00000001632	176	119	163	252	164	214	137	149	202	133	188	111	116
ENSMUSG00000001642	8	15	7	2	0	1	2	16	5	2	4	1	2
ENSMUSG00000001655	0	0	0	0	0	0	0	0	0	0	0	0	0
ENSMUSG00000001656	0	0	0	0	0	0	0	0	0	0	0	0	0
ENSMUSG00000001657	0	0	0	0	0	0	0	0	0	0	0	0	0
ENSMUSG00000001661	0	2	0	0	0	0	0	0	0	0	0	0	0
ENSMUSG00000001663	4120	4533	4211	88	286	48	135	303	305	106	275	35	142
ENSMUSG00000001665	889	893	1097	333	151	111	3004	2655	6550	368	486	51	277
ENSMUSG00000001666	2999	4298	3465	1281	734	686	817	1360	2374	2326	4036	1787	2537
ENSMUSG00000001670	14174	14386	18774	6560	9234	11923	9953	8252	16050	10328	12558	8964	11073
ENSMUSG00000001672	1	3	1	1	3	1	21	9	7	28	49	50	49
ENSMUSG00000001674	72	86	66	39	35	40	14	29	46	35	49	32	42
ENSMUSG00000001687	798	538	725	527	410	490	788	544	895	447	632	537	740
ENSMUSG00000001700	751	471	648	415	376	398	436	336	897	228	464	294	429
ENSMUSG00000001707	117	74	120	91	90	124	44	86	97	63	92	55	63
ENSMUSG00000001729	451	444	438	693	360	377	644	576	779	390	739	438	493
ENSMUSG00000001739	2	8	5	11	12	2	11	3	0	7	27	10	2
ENSMUSG00000001741	32	25	25	21	20	13	19	20	20	8	13	11	17
ENSMUSG00000001750	409	435	430	401	236	275	432	393	620	247	403	162	265
ENSMUSG00000001751	388	427	361	298	177	186	482	237	352	326	622	319	370
ENSMUSG00000001755	2205	1756	1699	1504	863	1047	1563	1297	1949	605	1112	670	917
ENSMUSG00000001761	72	47	57	39	32	34	0	4	3	4	8	1	6
ENSMUSG00000001763	147	158	124	238	229	304	197	238	417	27	78	58	35
ENSMUSG00000001767	152	95	143	107	113	101	138	143	224	47	73	86	113
ENSMUSG00000001768	194	155	171	130	133	174	144	146	286	44	59	53	80
ENSMUSG00000001773	0	0	1	0	0	0	0	0	0	0	0	0	0
ENSMUSG00000001774	356	284	360	123	243	358	237	177	357	108	221	159	178
ENSMUSG00000001783	761	606	686	645	482	586	545	684	1068	465	949	662	835
ENSMUSG00000001785	154	126	184	131	92	121	153	142	378	82	162	111	133
ENSMUSG00000001786	304	267	330	188	175	233	195	274	419	183	382	214	241
ENSMUSG00000001794	1597	1413	1355	933	657	721	974	1154	1976	2486	4119	1343	1549
ENSMUSG00000001802	260	192	207	481	231	354	710	581	662	107	257	136	138
ENSMUSG00000001804	0	0	0	0	0	0	0	0	0	0	0	0	2
ENSMUSG00000001815	0	0	0	0	0	0	0	0	0	0	0	0	0
ENSMUSG00000001819	0	0	0	0	0	0	0	0	0	0	0	0	0
ENSMUSG00000001823	0	0	0	0	0	0	0	0	0	0	0	0	0
ENSMUSG00000001827	0	1	0	0	0	0	0	0	0	0	1	1	0
ENSMUSG00000001829	466	365	411	500	335	436	385	429	664	272	519	362	459
ENSMUSG00000001833	756	517	640	232	309	345	345	301	634	116	181	187	337
ENSMUSG00000001844	249	268	230	382	212	268	209	178	397	130	240	174	197
ENSMUSG00000001847	1899	1569	1891	1342	954	1212	971	921	2014	795	1317	861	1156
ENSMUSG00000001855	172	136	156	191	140	157	136	191	193	195	247	123	148
ENSMUSG00000001864	3	0	1	3	3	3	25	27	15	159	240	186	204
ENSMUSG00000001865	0	0	0	0	0	0	0	0	0	0	0	0	0
ENSMUSG00000001870	35	45	34	122	64	65	10	45	71	65	168	70	66
ENSMUSG00000001891	5665	4258	6148	1943	1785	1972	3237	2122	5153	1431	2325	1890	2390
ENSMUSG00000001901	0	0	0	0	0	0	0	0	0	2	1	1	0
ENSMUSG00000001909	330	329	296	351	179	230	167	180	382	210	466	241	277
ENSMUSG00000001910	456	498	515	489	331	442	512	433	688	436	561	239	301
ENSMUSG00000001911	300	418	384	607	273	326	534	294	485	546	565	177	226
ENSMUSG00000001918	27	26	27	23	6	14	11	18	18	7	7	4	5
ENSMUSG00000001924	2336	1939	2371	2194	1721	1828	1696	1515	3339	1063	1663	1029	1267
ENSMUSG00000001930	124	55	99	157	68	104	51	98	139	68	159	49	52
ENSMUSG00000001942	480	350	422	264	268	304	320	455	655	117	168	142	179
ENSMUSG00000001943	9	7	10	5	4	6	0	5	2	3	4	6	3
ENSMUSG00000001946	118	114	125	116	75	77	114	126	166	108	263	74	158
ENSMUSG00000001948	6	8	4	0	0	0	0	7	12	6	11	5	5
ENSMUSG00000001962	141	135	151	138	103	95	156	115	282	55	139	76	75
ENSMUSG00000001964	59	71	63	47	27	42	67	65	58	34	84	47	54
ENSMUSG00000001983	214	164	163	137	127	137	106	101	159	108	161	129	156
ENSMUSG00000001985	0	0	1	2	2	1	12	1	2	1	0	0	1
ENSMUSG00000001986	13	13	7	9	8	14	34	75	70	0	1	0	0
ENSMUSG00000001988	0	0	2	2	1	4	16	3	3	0	0	0	1
ENSMUSG00000001995	57	42	56	116	80	70	28	42	44	10	11	6	8
ENSMUSG00000001998	60	30	63	36	67	55	24	44	59	29	45	37	66
ENSMUSG00000001999	129	94	129	80	54	77	162	123	170	20	26	9	31
ENSMUSG00000002006	0	3	5	10	9	12	1	7	5	7	19	10	15
ENSMUSG00000002007	8	4	1	6	6	3	4	5	6	4	13	5	0
ENSMUSG00000002010	829	855	874	1068	623	769	436	807	1234	876	1823	632	878
ENSMUSG00000002012	2	4	0	0	0	2	0	0	0	0	8	1	0
ENSMUSG00000002014	973	1470	1511	522	470	523	419	1149	791	1263	2548	1217	1522
ENSMUSG00000002015	1509	1564	1618	1175	837	912	1139	1056	2296	629	1428	1035	1254
ENSMUSG00000002017	481	366	420	418	393	497	431	490	1103	205	312	283	320
ENSMUSG00000002020	18	12	17	18	6	5	8	21	9	41	65	32	38
ENSMUSG00000002028	289	183	257	228	405	448	92	270	236	237	361	220	285
ENSMUSG00000002031	358	392	362	213	136	152	184	317	444	384	672	295	427
ENSMUSG00000002032	765	566	846	780	615	804	293	349	564	129	165	89	178
ENSMUSG00000002033	12	2	4	2	1	1	0	5	2	3	4	10	18
ENSMUSG00000002043	146	125	75	162	72	82	176	223	140	259	526	297	355
ENSMUSG00000002052	652	601	573	679	671	844	426	830	852	471	829	429	492
ENSMUSG00000002055	8	3	12	7	11	10	0	15	18	1	1	3	4
ENSMUSG00000002057	0	0	0	0	0	0	0	0	0	0	0	0	0
ENSMUSG00000002058	181	74	85	75	62	56	955	718	1384	102	211	150	210
ENSMUSG00000002059	73	47	46	10	10	5	28	34	60	20	34	16	25
ENSMUSG00000002064	435	371	402	440	317	375	278	560	743	354	802	528	704
ENSMUSG00000002068	11	6	6	19	5	3	39	8	58	4	2	2	3
ENSMUSG00000002076	6	5	8	31	39	31	188	120	240	4	13	11	14
ENSMUSG00000002083	141	205	83	67	55	48	45	48	31	87	187	114	153
ENSMUSG00000002100	2	0	0	3	2	2	0	0	0	0	3	0	2
ENSMUSG00000002102	977	833	845	824	510	603	611	531	885	687	1218	825	1030
ENSMUSG00000002103	650	598	699	932	760	928	601	719	1203	774	1311	790	1166
ENSMUSG00000002104	0	1	1	1	1	0	0	1	1	1	0	0	0
ENSMUSG00000002105	118	140	103	198	85	122	106	100	162	249	329	136	133
ENSMUSG00000002107	187	122	180	77	122	113	74	87	155	89	132	123	130
ENSMUSG00000002108	1497	1325	1329	1811	1165	1508	1206	995	2118	619	1046	706	839
ENSMUSG00000002109	38	21	34	27	27	32	28	51	29	9	22	12	6
ENSMUSG00000002111	20	7	15	10	10	5	7	18	17	6	19	14	12
ENSMUSG00000002129	275	290	330	304	176	223	170	282	422	274	442	210	226
ENSMUSG00000002147	837	742	818	868	598	858	519	478	842	404	716	388	505
ENSMUSG00000002190	0	0	0	0	0	0	47	26	41	0	0	0	1
ENSMUSG00000002204	9	6	4	3	3	1	8	4	7	6	10	9	7
ENSMUSG00000002205	316	219	267	234	146	169	274	210	423	218	489	241	293
ENSMUSG00000002210	107	138	122	96	47	61	50	94	112	101	190	97	103
ENSMUSG00000002221	255	237	255	243	209	257	137	234	285	124	177	103	124
ENSMUSG00000002222	2977	1760	2412	1910	1929	2363	1094	1458	3047	635	1382	1088	1469
ENSMUSG00000002227	268	296	274	337	150	170	504	457	586	577	1067	400	449
ENSMUSG00000002228	6	0	3	2	1	5	2	4	5	2	7	2	2
ENSMUSG00000002233	118	165	128	238	171	213	240	345	148	1030	2737	1468	1704
ENSMUSG00000002240	0	0	0	0	0	0	0	0	0	0	0	0	0
ENSMUSG00000002249	137	137	158	149	67	100	110	152	161	130	249	61	81
ENSMUSG00000002250	93	105	99	128	118	101	84	273	93	86	101	52	193
ENSMUSG00000002257	1	1	1	6	1	1	4	7	2	10	6	6	7
ENSMUSG00000002265	89	38	55	46	77	119	2	23	22	8	19	7	10
ENSMUSG00000002266	0	0	0	0	0	0	0	0	0	0	0	0	0
ENSMUSG00000002274	6	3	1	6	0	1	0	12	6	0	1	7	3
ENSMUSG00000002279	671	590	587	841	465	609	1135	954	1563	469	911	462	516
ENSMUSG00000002280	286	269	238	317	186	215	198	254	308	192	335	213	298
ENSMUSG00000002289	1468	484	631	512	355	1036	802	611	516	150	972	499	665
ENSMUSG00000002297	53	23	30	10	8	14	28	9	31	36	46	33	78
ENSMUSG00000002307	179	168	155	154	98	91	116	169	152	136	252	96	116
ENSMUSG00000002308	46	48	52	51	22	37	30	15	59	20	37	34	32
ENSMUSG00000002319	302	276	314	431	336	363	381	321	524	262	506	339	409
ENSMUSG00000002320	518	386	384	445	334	396	498	568	849	151	436	280	408
ENSMUSG00000002324	64	23	35	0	5	2	0	1	1	2	3	4	0
ENSMUSG00000002325	445	357	426	169	175	189	435	373	770	395	565	262	503
ENSMUSG00000002326	185	138	175	144	124	147	182	249	400	156	307	148	218
ENSMUSG00000002329	203	257	252	122	95	121	126	207	249	85	174	103	152
ENSMUSG00000002332	1595	1488	1599	1227	891	961	1352	1867	2096	409	803	444	529
ENSMUSG00000002341	0	0	0	0	0	0	0	0	0	0	0	0	0
ENSMUSG00000002342	247	266	216	411	271	354	180	274	373	143	279	157	215
ENSMUSG00000002343	54	39	46	38	27	38	63	53	91	28	63	61	74
ENSMUSG00000002345	0	3	0	3	2	0	0	1	2	7	3	7	3
ENSMUSG00000002346	1746	1459	1411	1835	980	1358	937	960	1440	1037	2295	1016	1334
ENSMUSG00000002365	97	85	102	269	209	234	172	181	300	192	287	225	270
ENSMUSG00000002372	407	355	300	403	208	265	305	371	468	212	521	277	310
ENSMUSG00000002379	358	382	343	197	158	137	285	588	448	1195	1763	783	1083
ENSMUSG00000002384	2	0	0	2	3	3	0	2	0	0	0	1	3
ENSMUSG00000002393	695	756	659	557	367	439	1431	696	957	307	475	369	467
ENSMUSG00000002395	253	341	265	321	173	198	212	270	253	257	395	271	321
ENSMUSG00000002396	225	232	193	348	311	381	333	421	622	156	289	161	213
ENSMUSG00000002409	251	342	250	153	101	105	218	213	171	256	547	187	148
ENSMUSG00000002413	289	222	258	152	268	251	90	190	263	99	154	152	212
ENSMUSG00000002416	316	378	318	180	149	165	232	385	281	348	524	385	454
ENSMUSG00000002428	147	114	161	67	81	80	96	70	174	63	113	107	154
ENSMUSG00000002455	810	580	623	707	562	718	343	524	770	240	469	318	359
ENSMUSG00000002458	21	9	15	19	12	9	29	19	18	23	10	10	14
ENSMUSG00000002459	1	1	0	1	0	4	0	1	1	1	2	0	0
ENSMUSG00000002475	714	414	665	450	448	492	109	159	328	191	317	232	362
ENSMUSG00000002477	53	77	82	26	36	35	49	54	107	51	71	60	77
ENSMUSG00000002486	38	19	39	36	16	23	20	24	39	21	15	11	30
ENSMUSG00000002489	19	24	25	18	21	7	0	3	2	56	32	24	21
ENSMUSG00000002496	597	456	559	655	403	459	325	372	641	499	804	400	438
ENSMUSG00000002500	0	3	0	5	2	1	142	176	295	3	6	5	9
ENSMUSG00000002504	307	275	267	249	90	120	202	187	234	217	257	109	142
ENSMUSG00000002524	741	807	782	783	399	497	603	598	960	454	714	485	555
ENSMUSG00000002546	590	548	475	488	344	371	380	406	689	243	604	331	402
ENSMUSG00000002550	396	261	301	161	141	158	217	179	315	61	89	75	86
ENSMUSG00000002565	0	2	0	0	0	0	0	0	0	0	0	0	1
ENSMUSG00000002578	24	20	11	19	9	13	0	4	10	3	9	3	5
ENSMUSG00000002580	573	628	632	332	285	343	350	386	786	220	330	250	316
ENSMUSG00000002588	9545	8750	11120	6620	5301	6071	4594	5691	11866	2906	5188	3703	5278
ENSMUSG00000002602	225	110	213	115	70	54	98	145	256	46	51	34	55
ENSMUSG00000002603	113	91	113	59	25	40	127	113	84	127	176	78	94
ENSMUSG00000002608	332	364	342	412	217	265	159	169	221	419	605	262	337
ENSMUSG00000002617	14	33	35	37	34	37	41	52	117	7	11	8	21
ENSMUSG00000002625	412	370	328	320	250	295	238	279	500	160	343	215	252
ENSMUSG00000002633	2	4	3	0	1	0	0	0	1	8	4	6	4
ENSMUSG00000002635	97	86	92	65	60	58	31	64	80	32	62	33	40
ENSMUSG00000002658	150	184	151	185	122	157	108	155	243	152	260	170	208
ENSMUSG00000002660	556	668	477	339	218	281	284	472	464	537	794	502	672
ENSMUSG00000002661	134	160	115	112	73	92	114	112	116	94	177	141	208
ENSMUSG00000002664	0	2	0	1	1	1	2	0	0	0	3	2	3
ENSMUSG00000002668	42	42	41	64	38	48	34	30	52	58	87	70	77
ENSMUSG00000002679	87	89	108	60	68	65	46	53	97	59	92	53	99
ENSMUSG00000002688	4	1	1	2	0	3	0	1	0	0	1	1	0
ENSMUSG00000002699	47	21	29	36	30	22	3	22	40	28	15	25	31
ENSMUSG00000002718	445	331	503	309	411	421	315	295	789	166	275	214	313
ENSMUSG00000002728	73	60	95	68	57	63	59	62	163	101	150	89	150
ENSMUSG00000002731	250	167	226	143	137	141	176	201	353	128	265	185	269
ENSMUSG00000002732	21	32	32	31	20	21	87	79	147	34	56	39	48
ENSMUSG00000002733	315	202	282	179	148	206	171	188	379	157	217	150	206
ENSMUSG00000002741	958	781	696	796	648	796	651	645	1648	427	799	651	806
ENSMUSG00000002748	639	452	553	601	549	766	370	439	687	210	385	362	280
ENSMUSG00000002763	1237	938	853	1009	474	680	728	481	784	208	448	330	327
ENSMUSG00000002767	437	440	393	449	200	268	433	489	684	453	834	472	536
ENSMUSG00000002768	396	503	377	214	153	162	334	501	459	381	867	494	565
ENSMUSG00000002769	23746	29957	21732	18028	7602	11440	6226	7460	10212	10056	15713	9109	13518
ENSMUSG00000002771	8	3	4	6	2	6	1	1	3	7	10	3	5
ENSMUSG00000002778	2164	2632	1893	1457	805	949	1252	1603	2387	1554	2622	1531	1600
ENSMUSG00000002781	450	588	386	278	175	188	386	359	431	277	552	300	317
ENSMUSG00000002797	67	73	68	125	129	161	47	63	100	142	156	116	304
ENSMUSG00000002799	0	1	2	5	1	2	0	2	5	0	1	1	3
ENSMUSG00000002803	239	202	244	152	119	121	324	195	399	135	209	191	182
ENSMUSG00000002804	132	121	111	134	74	93	86	124	157	158	256	196	232
ENSMUSG00000002808	4	6	7	2	2	5	2	5	3	8	28	7	38
ENSMUSG00000002812	639	527	563	631	395	459	605	497	911	259	401	218	304
ENSMUSG00000002814	101	63	94	95	71	96	112	117	185	65	79	73	107
ENSMUSG00000002820	216	173	177	347	148	195	186	139	267	98	226	160	171
ENSMUSG00000002825	27	26	19	57	28	46	26	35	54	10	26	11	31
ENSMUSG00000002831	105	61	40	24	46	78	19	62	59	200	413	105	102
ENSMUSG00000002833	365	317	303	286	194	208	195	275	387	232	453	244	265
ENSMUSG00000002835	17	7	13	14	10	5	12	23	25	24	42	18	45
ENSMUSG00000002844	97	106	98	61	54	52	196	294	283	136	277	197	266
ENSMUSG00000002845	105	96	114	168	154	138	81	156	260	103	117	80	117
ENSMUSG00000002846	371	280	188	231	174	176	255	223	410	140	218	173	199
ENSMUSG00000002847	508	597	706	380	324	325	527	810	1083	407	893	424	591
ENSMUSG00000002870	49	36	57	55	58	54	107	92	168	34	88	49	92
ENSMUSG00000002871	195	196	186	218	124	153	242	238	314	144	333	136	189
ENSMUSG00000002881	688	587	843	440	475	466	383	349	695	143	221	187	240
ENSMUSG00000002885	162	114	153	146	74	70	100	106	131	97	112	95	99
ENSMUSG00000002897	208	183	194	283	170	231	271	303	590	128	289	107	255
ENSMUSG00000002900	121	69	118	86	42	71	56	94	108	35	66	26	53
ENSMUSG00000002908	57	58	52	83	36	50	101	106	180	23	45	37	46
ENSMUSG00000002910	114	140	121	158	123	152	258	276	285	103	177	118	111
ENSMUSG00000002930	0	0	0	0	0	0	0	0	0	0	0	0	0
ENSMUSG00000002944	1362	412	805	339	392	212	393	256	750	156	445	236	471
ENSMUSG00000002948	199	136	168	251	167	194	95	151	212	95	130	101	106
ENSMUSG00000002949	503	404	458	476	268	319	235	266	590	204	390	236	270
ENSMUSG00000002957	1563	1257	1411	1121	1038	1191	1053	946	1839	494	1018	698	1124
ENSMUSG00000002963	268	225	235	126	91	97	171	217	286	117	269	128	150
ENSMUSG00000002968	385	400	310	632	249	304	725	452	623	373	604	317	362
ENSMUSG00000002980	61	61	35	97	36	30	69	40	25	172	461	128	170
ENSMUSG00000002981	1401	1192	1263	1166	766	944	1391	1095	1890	969	1547	899	1183
ENSMUSG00000002983	18	15	17	23	16	13	33	30	33	5	38	32	27
ENSMUSG00000002984	263	249	224	410	156	202	284	278	338	109	209	179	144
ENSMUSG00000002985	164131	194278	130643	130056	55068	66743	180327	133379	163083	183382	309849	166901	162338
ENSMUSG00000002992	1963	3714	2714	3220	1775	1791	1741	1748	3418	926	1907	1030	1113
ENSMUSG00000002996	1270	1006	1313	1039	835	863	731	964	1745	400	848	487	657
ENSMUSG00000002997	1	3	5	4	6	2	4	3	10	3	3	4	1
ENSMUSG00000003031	313	271	211	182	151	174	209	146	281	90	171	130	84
ENSMUSG00000003032	6	10	21	7	4	6	10	10	13	12	14	7	10
ENSMUSG00000003033	381	281	327	323	213	268	414	428	743	442	701	330	455
ENSMUSG00000003037	968	994	949	754	475	663	647	949	1562	584	1421	749	842
ENSMUSG00000003038	78	109	87	5	10	7	8	27	0	19	21	16	22
ENSMUSG00000003039	708	784	727	703	481	673	707	1080	1452	1211	2155	1111	1452
ENSMUSG00000003051	5	14	8	8	3	6	349	350	289	8	4	1	4
ENSMUSG00000003053	23057	17369	26933	8983	15802	10762	122	346	802	17675	23205	16761	22647
ENSMUSG00000003062	105	86	120	90	55	66	68	63	132	62	79	95	147
ENSMUSG00000003068	1107	1092	951	956	419	584	764	554	982	507	902	574	667
ENSMUSG00000003070	2	1	2	0	2	0	2	0	1	0	2	0	0
ENSMUSG00000003072	2739	3243	3084	2091	986	1154	2172	4105	2619	4029	7104	3160	3682
ENSMUSG00000003099	532	442	436	562	345	468	299	481	477	301	605	371	472
ENSMUSG00000003119	226	128	195	190	228	254	75	166	166	138	253	163	232
ENSMUSG00000003123	190	195	148	229	147	151	256	126	306	196	323	121	133
ENSMUSG00000003131	438	351	466	339	264	383	251	292	554	124	190	148	218
ENSMUSG00000003134	187	101	137	178	142	189	104	132	211	52	89	56	91
ENSMUSG00000003153	0	0	0	0	1	1	0	0	0	0	0	0	0
ENSMUSG00000003154	192	161	196	146	133	173	107	140	250	141	193	83	107
ENSMUSG00000003161	356	370	437	164	154	167	109	127	227	77	95	57	105
ENSMUSG00000003166	670	548	671	766	555	645	560	472	1085	210	395	326	390
ENSMUSG00000003178	74	36	36	67	122	174	20	132	83	90	102	106	99
ENSMUSG00000003184	780	805	706	464	239	331	771	806	1026	463	882	429	511
ENSMUSG00000003190	86	111	95	63	42	53	67	62	80	47	64	34	39
ENSMUSG00000003198	90	62	97	22	30	28	21	24	66	22	28	35	47
ENSMUSG00000003199	658	719	599	834	417	660	302	256	455	158	258	242	239
ENSMUSG00000003200	210	201	235	247	159	268	335	271	359	129	272	139	156
ENSMUSG00000003206	4	1	3	3	0	4	2	5	5	0	2	1	2
ENSMUSG00000003208	24	39	35	83	35	40	23	46	54	32	71	42	41
ENSMUSG00000003226	765	553	764	458	1046	1028	187	346	560	181	358	411	595
ENSMUSG00000003227	0	0	0	0	0	1	0	2	4	0	0	0	1
ENSMUSG00000003228	48	32	52	24	34	29	5	19	36	8	22	26	27
ENSMUSG00000003233	122	61	114	155	96	115	85	146	128	197	226	81	99
ENSMUSG00000003234	484	381	508	492	388	535	237	387	672	253	455	337	383
ENSMUSG00000003235	503	416	448	467	322	442	255	248	615	147	265	236	294
ENSMUSG00000003269	191	175	136	188	127	150	246	165	332	115	183	116	123
ENSMUSG00000003271	1	0	0	0	0	0	76	69	115	61	119	80	98
ENSMUSG00000003273	10	3	7	26	10	31	10	2	10	29	89	30	28
ENSMUSG00000003279	40	46	46	13	25	17	6	17	15	3	9	9	9
ENSMUSG00000003282	3	3	0	5	4	7	0	0	0	0	2	3	2
ENSMUSG00000003283	44	13	34	17	13	12	11	31	58	7	6	23	21
ENSMUSG00000003299	363	383	318	222	125	146	196	199	262	333	585	308	384
ENSMUSG00000003308	574	591	497	618	376	483	671	486	804	250	409	335	423
ENSMUSG00000003309	4	4	8	2	4	0	0	3	1	3	2	3	2
ENSMUSG00000003316	489	323	416	489	604	718	319	469	764	118	208	184	255
ENSMUSG00000003341	0	0	0	0	0	0	0	0	0	0	0	0	0
ENSMUSG00000003344	350	367	327	388	196	202	462	372	508	444	875	332	409
ENSMUSG00000003345	895	845	615	850	460	500	1211	1132	1121	684	1314	743	771
ENSMUSG00000003346	572	532	490	804	383	394	938	615	827	295	503	430	498
ENSMUSG00000003348	14	16	17	25	20	15	27	29	25	17	24	18	21
ENSMUSG00000003352	6	6	7	9	3	6	12	9	2	3	6	0	5
ENSMUSG00000003354	3	2	1	0	0	2	0	0	0	0	1	0	0
ENSMUSG00000003355	94	114	90	56	35	51	18	16	14	8	65	23	40
ENSMUSG00000003360	580	352	357	674	458	564	464	538	1064	324	716	415	514
ENSMUSG00000003363	354	256	282	389	198	292	331	301	427	279	399	250	292
ENSMUSG00000003378	180	106	93	127	54	84	4	6	14	14	24	13	12
ENSMUSG00000003379	17	6	7	12	3	2	0	6	12	9	4	6	5
ENSMUSG00000003380	532	524	409	416	215	269	395	395	392	663	1091	684	773
ENSMUSG00000003382	174	159	159	175	172	208	168	281	380	70	118	89	110
ENSMUSG00000003402	1322	1419	1105	1258	562	717	1022	997	1275	636	1552	795	879
ENSMUSG00000003410	0	0	0	0	0	0	0	0	0	0	0	0	0
ENSMUSG00000003411	6	1	2	0	0	0	0	0	0	0	0	0	2
ENSMUSG00000003418	0	0	2	1	2	0	0	4	4	0	0	0	0
ENSMUSG00000003420	2443	2156	1979	1564	955	1043	1737	1358	2297	1178	2132	1121	1212
ENSMUSG00000003421	213	239	213	249	125	149	266	305	320	286	493	192	231
ENSMUSG00000003423	283	290	294	149	71	103	136	100	157	76	128	64	109
ENSMUSG00000003429	249	235	215	302	230	287	244	240	722	135	151	82	124
ENSMUSG00000003435	799	915	835	851	511	677	420	664	983	840	1522	555	681
ENSMUSG00000003436	0	0	0	0	0	0	0	0	0	0	0	0	0
ENSMUSG00000003437	389	443	386	315	182	220	225	371	469	256	521	243	282
ENSMUSG00000003438	342	312	276	346	200	227	344	233	402	249	387	280	410
ENSMUSG00000003444	59	67	43	22	16	20	106	87	144	211	199	134	164
ENSMUSG00000003452	1	2	1	1	0	4	0	0	1	1	0	2	0
ENSMUSG00000003458	633	484	633	629	432	442	411	519	770	703	854	456	494
ENSMUSG00000003464	2030	1650	1943	895	639	612	926	937	1895	989	2040	1332	1601
ENSMUSG00000003469	1	0	1	6	2	0	0	0	1	22	23	13	8
ENSMUSG00000003476	9	1	7	3	4	0	0	0	0	56	78	34	61
ENSMUSG00000003477	7643	7546	7781	185	623	88	55	148	119	13387	27505	29535	24613
ENSMUSG00000003484	0	8	1	3	2	1	0	1	1	0	1	0	0
ENSMUSG00000003500	24	24	23	30	15	13	18	47	27	11	29	20	16
ENSMUSG00000003505	0	0	0	0	0	0	0	0	0	0	0	0	0
ENSMUSG00000003518	749	511	713	499	425	596	1334	1579	2148	233	315	243	363
ENSMUSG00000003526	104	46	58	74	38	37	86	244	80	249	501	396	639
ENSMUSG00000003527	77	73	70	65	48	49	75	86	127	163	208	93	112
ENSMUSG00000003528	4417	4484	4135	3206	2057	1698	4085	4301	6761	2983	5572	3681	3554
ENSMUSG00000003531	498	469	422	329	197	214	319	247	516	418	626	507	576
ENSMUSG00000003534	27	31	20	46	11	11	87	97	70	18	28	15	15
ENSMUSG00000003541	12	9	9	10	4	4	17	21	23	20	23	8	18
ENSMUSG00000003545	4	1	4	2	1	3	3	26	6	1	8	1	5
ENSMUSG00000003546	718	590	553	660	381	501	509	650	857	620	1331	675	852
ENSMUSG00000003549	38	54	66	44	26	33	44	47	41	146	255	104	105
ENSMUSG00000003555	147	159	162	127	49	51	20	20	51	9756	22495	9934	11012
ENSMUSG00000003559	507	474	489	366	240	306	42	46	54	1198	2745	1813	1909
ENSMUSG00000003573	11	5	8	17	10	13	0	11	16	9	27	13	16
ENSMUSG00000003575	174	169	152	207	104	113	146	134	207	128	191	99	133
ENSMUSG00000003581	153	83	110	102	74	88	128	104	167	68	95	64	80
ENSMUSG00000003585	10610	9864	9912	6141	4692	5482	5157	7521	11224	7120	17028	9784	11740
ENSMUSG00000003604	145	180	168	103	104	135	179	124	339	48	111	87	153
ENSMUSG00000003617	11090	6287	10491	5655	8162	8161	6213	7193	14846	4664	10722	9000	11327
ENSMUSG00000003623	7913	5309	8021	2430	3468	3752	1989	2503	3951	1024	1892	1856	3475
ENSMUSG00000003644	230	199	234	150	128	104	531	442	667	249	410	239	234
ENSMUSG00000003657	0	0	0	0	0	0	0	0	0	0	0	0	0
ENSMUSG00000003660	770	525	795	937	1016	1118	439	694	1092	612	1073	613	832
ENSMUSG00000003662	572	482	558	373	282	342	212	562	392	362	784	502	604
ENSMUSG00000003665	0	0	0	0	2	0	2	0	1	0	1	0	0
ENSMUSG00000003680	52	31	30	37	15	35	85	68	96	15	25	17	20
ENSMUSG00000003721	2334	1396	2028	1545	3118	3601	1304	2792	4228	300	799	516	1129
ENSMUSG00000003731	846	633	777	638	602	671	347	636	1113	461	699	432	600
ENSMUSG00000003746	3272	2204	2959	1619	1661	2021	1700	1750	2733	1009	1976	1763	1990
ENSMUSG00000003752	113	95	89	89	79	102	63	75	95	41	74	23	54
ENSMUSG00000003762	275	239	179	191	103	136	235	231	292	151	336	171	233
ENSMUSG00000003778	150	127	130	136	113	128	106	122	160	76	125	81	125
ENSMUSG00000003779	58	53	76	36	45	46	36	67	104	24	39	28	57
ENSMUSG00000003808	232	185	179	274	163	259	200	227	322	150	245	138	194
ENSMUSG00000003809	7157	5507	7297	4724	3580	4526	2567	3177	6526	4556	10497	5871	6198
ENSMUSG00000003810	263	227	233	283	266	335	260	355	491	155	278	107	157
ENSMUSG00000003812	140	91	85	16	16	14	0	0	0	10	7	5	4
ENSMUSG00000003813	446	346	348	288	142	190	339	377	416	317	567	298	399
ENSMUSG00000003814	11711	10518	12835	7234	6214	7353	6709	8019	13050	6972	13266	8342	11102
ENSMUSG00000003824	99	66	123	90	75	62	10	14	64	10	16	19	18
ENSMUSG00000003847	699	463	571	622	992	1272	232	502	702	219	477	321	350
ENSMUSG00000003848	132	111	126	109	48	104	105	108	158	120	179	98	141
ENSMUSG00000003849	125	112	160	183	159	170	385	582	967	2	6	1	3
ENSMUSG00000003863	0	2	0	0	0	0	0	0	1	0	1	2	1
ENSMUSG00000003865	27	16	28	46	33	38	19	20	39	30	62	31	36
ENSMUSG00000003868	102	91	106	147	63	98	131	101	168	95	134	86	115
ENSMUSG00000003872	0	0	0	0	1	0	0	0	1	0	0	0	1
ENSMUSG00000003873	177	169	131	111	66	93	181	189	278	117	178	135	138
ENSMUSG00000003882	9	2	1	0	2	2	3	5	3	0	0	1	0
ENSMUSG00000003923	628	454	523	330	302	366	313	268	604	182	265	285	374
ENSMUSG00000003929	69	24	48	34	55	42	4	16	52	45	65	39	54
ENSMUSG00000003934	0	3	2	0	1	0	0	0	0	0	1	1	0
ENSMUSG00000003948	88	95	92	8	7	4	49	56	33	49	52	31	37
ENSMUSG00000003949	583	489	772	718	495	690	921	844	1435	724	927	555	395
ENSMUSG00000003955	410	419	397	259	211	248	228	237	489	211	268	192	262
ENSMUSG00000003970	2166	2601	1971	2547	1121	1368	1968	1574	2376	1615	2623	1880	2305
ENSMUSG00000003974	1	0	0	0	0	0	0	0	1	0	0	0	0
ENSMUSG00000003992	23	14	26	31	13	33	2	6	7	7	15	9	11
ENSMUSG00000004018	95	77	110	42	49	47	28	45	46	3	22	24	26
ENSMUSG00000004031	0	0	0	0	0	0	0	1	0	0	0	0	0
ENSMUSG00000004032	114	95	84	48	31	34	108	98	311	106	165	131	182
ENSMUSG00000004035	840	904	895	1401	856	973	246	320	738	2543	4776	2259	2858
ENSMUSG00000004038	492	561	671	103	196	103	672	537	2046	67	111	84	107
ENSMUSG00000004040	1224	1168	1245	1019	771	958	446	617	967	908	1518	809	1207
ENSMUSG00000004043	185	174	213	202	161	229	146	159	210	67	166	95	154
ENSMUSG00000004044	184	210	163	218	111	103	150	140	169	45	108	72	70
ENSMUSG00000004054	652	623	495	568	279	359	535	507	553	282	509	297	317
ENSMUSG00000004056	711	595	678	858	562	632	591	386	790	497	820	304	333
ENSMUSG00000004069	45	46	48	38	37	57	47	57	48	0	0	0	0
ENSMUSG00000004070	348	327	388	260	195	300	345	381	785	192	370	280	313
ENSMUSG00000004071	1066	811	1001	1626	833	1266	565	754	955	1094	1779	886	1122
ENSMUSG00000004085	101	85	132	45	41	43	39	61	97	72	207	110	118
ENSMUSG00000004096	514	614	567	160	129	146	268	395	414	456	825	366	562
ENSMUSG00000004098	1038	838	818	70	126	38	2725	2682	5850	337	517	286	492
ENSMUSG00000004099	154	104	138	133	130	126	127	175	191	68	174	83	126
ENSMUSG00000004100	151	147	109	222	68	122	147	140	172	89	172	102	98
ENSMUSG00000004105	203	176	187	320	134	144	59	189	141	228	438	218	308
ENSMUSG00000004110	1	1	0	0	2	0	8	9	16	1	0	0	0
ENSMUSG00000004113	0	0	0	0	0	1	0	0	0	0	0	0	0
ENSMUSG00000004127	52	37	29	18	15	19	4	28	39	14	44	23	51
ENSMUSG00000004151	7	2	3	2	3	3	0	2	5	7	4	2	3
ENSMUSG00000004187	129	151	143	86	64	111	75	57	61	111	189	54	76
ENSMUSG00000004207	7883	5710	5576	6762	3539	4464	5470	6065	9357	4718	10113	7042	7811
ENSMUSG00000004221	1265	736	977	814	1313	1574	444	687	1317	224	382	431	706
ENSMUSG00000004231	0	0	0	0	0	1	0	0	0	0	0	0	0
ENSMUSG00000004233	9	3	15	9	13	12	0	15	16	12	11	3	15
ENSMUSG00000004263	388	507	478	373	174	210	500	546	407	850	1540	282	337
ENSMUSG00000004264	1548	1825	1606	2053	974	1351	1211	1331	1919	1162	2537	1412	1629
ENSMUSG00000004266	254	180	217	199	130	166	247	261	385	158	318	240	252
ENSMUSG00000004267	1	3	0	10	3	10	2	1	5	10	13	4	7
ENSMUSG00000004268	451	393	472	382	275	348	289	317	426	191	267	193	214
ENSMUSG00000004270	1810	1449	1528	1222	816	780	1164	1273	2031	950	1794	844	1328
ENSMUSG00000004285	450	531	411	377	216	173	353	508	629	610	1053	710	747
ENSMUSG00000004296	1	0	0	0	0	0	0	0	1	0	0	0	0
ENSMUSG00000004317	1	7	3	3	23	15	7	8	8	3	8	16	27
ENSMUSG00000004319	701	437	590	354	448	576	389	494	818	233	393	338	509
ENSMUSG00000004328	3	0	0	4	1	5	0	5	3	4	3	0	2
ENSMUSG00000004341	34	58	37	24	16	14	0	0	0	0	0	0	0
ENSMUSG00000004344	0	3	0	1	5	5	0	0	0	0	0	0	0
ENSMUSG00000004347	1	0	3	1	0	2	0	0	0	0	1	0	2
ENSMUSG00000004356	208	122	220	181	261	280	482	548	937	55	102	76	114
ENSMUSG00000004359	6	0	3	1	1	1	5	2	5	1	2	3	2
ENSMUSG00000004360	0	0	0	0	1	0	0	0	0	0	0	0	0
ENSMUSG00000004364	852	623	831	467	493	531	505	471	1015	332	510	398	567
ENSMUSG00000004366	0	0	0	0	0	0	0	0	0	0	0	0	0
ENSMUSG00000004371	0	1	0	1	1	2	0	0	0	0	0	0	0
ENSMUSG00000004383	100	66	60	213	191	223	231	201	365	124	232	152	242
ENSMUSG00000004393	294	283	275	313	212	250	236	191	358	284	446	280	387
ENSMUSG00000004394	1051	966	1007	820	586	732	1431	1647	2148	441	1003	619	783
ENSMUSG00000004415	0	0	0	22	12	7	0	3	7	0	0	0	0
ENSMUSG00000004446	176	188	171	99	60	67	79	58	115	223	420	161	261
ENSMUSG00000004451	170	210	163	124	113	123	172	175	321	85	129	126	113
ENSMUSG00000004455	50	30	45	16	18	26	47	41	71	104	157	159	209
ENSMUSG00000004460	781	612	787	446	573	646	424	430	836	207	463	378	463
ENSMUSG00000004462	274	227	358	175	177	186	163	173	359	313	558	338	374
ENSMUSG00000004473	17	25	24	33	7	19	31	18	18	10	19	8	13
ENSMUSG00000004500	56	59	72	46	73	51	37	105	104	62	92	61	73
ENSMUSG00000004508	34	27	28	40	33	39	12	39	45	21	45	20	33
ENSMUSG00000004530	320	227	296	263	204	205	234	341	457	158	253	199	210
ENSMUSG00000004535	2057	1344	1964	1560	1481	1772	1106	1307	2555	630	1225	913	1085
ENSMUSG00000004540	0	1	0	0	0	0	0	0	0	0	0	0	0
ENSMUSG00000004542	0	0	0	0	0	0	0	0	0	0	0	0	0
ENSMUSG00000004552	11	2	1	14	7	7	6	6	19	1	2	2	0
ENSMUSG00000004558	14283	14245	14800	17064	9462	13181	4631	4835	15609	10510	22565	13994	15073
ENSMUSG00000004561	142	152	163	185	94	164	149	150	182	209	414	167	222
ENSMUSG00000004562	113	99	75	237	175	236	119	146	215	47	66	31	48
ENSMUSG00000004565	265	272	265	265	330	361	192	260	417	334	553	426	618
ENSMUSG00000004567	471	418	399	428	292	303	251	276	394	654	1091	755	915
ENSMUSG00000004568	363	285	373	354	274	364	206	221	451	171	252	219	356
ENSMUSG00000004591	587	375	482	265	321	355	241	260	533	91	151	131	188
ENSMUSG00000004609	7	4	2	6	3	2	0	7	6	1	3	4	2
ENSMUSG00000004610	2330	2487	2327	2334	1390	1604	1637	1287	2770	1346	2376	2194	2472
ENSMUSG00000004612	6	2	5	2	1	0	8	12	8	3	6	3	7
ENSMUSG00000004613	0	0	0	0	0	0	0	0	0	0	0	0	0
ENSMUSG00000004626	397	326	298	353	234	271	209	218	364	242	367	268	283
ENSMUSG00000004630	0	0	1	0	2	1	0	0	0	0	2	5	1
ENSMUSG00000004631	77	46	59	44	38	42	84	40	51	17	29	9	19
ENSMUSG00000004633	326	252	247	275	196	263	308	231	343	158	265	172	194
ENSMUSG00000004637	92	48	87	59	33	36	33	53	78	48	68	63	52
ENSMUSG00000004642	32	19	15	19	18	19	18	51	39	16	30	13	22
ENSMUSG00000004651	0	0	0	0	0	0	0	0	0	0	0	0	0
ENSMUSG00000004654	1	0	2	0	0	0	0	0	1	5	7	2	3
ENSMUSG00000004655	1299	948	1080	1558	1068	940	546	674	1706	225	591	341	427
ENSMUSG00000004661	12	10	13	16	18	9	3	7	10	12	20	9	15
ENSMUSG00000004665	69	49	73	54	41	26	103	68	88	55	85	53	57
ENSMUSG00000004667	247	311	265	446	157	234	276	262	362	318	600	279	326
ENSMUSG00000004668	0	0	0	0	0	0	0	1	0	0	0	0	1
ENSMUSG00000004677	438	316	372	384	335	429	283	493	619	289	515	306	362
ENSMUSG00000004698	8	2	9	3	2	0	0	0	8	5	11	6	10
ENSMUSG00000004707	21	1	22	11	7	7	14	19	17	4	5	5	9
ENSMUSG00000004709	2	2	2	4	4	2	0	4	5	1	4	3	2
ENSMUSG00000004730	112	44	99	31	32	24	47	94	156	30	14	25	38
ENSMUSG00000004748	407	406	377	194	167	182	137	270	310	248	423	316	340
ENSMUSG00000004768	112	70	145	23	33	28	118	116	244	42	67	59	90
ENSMUSG00000004771	693	537	764	409	353	474	343	441	906	352	525	434	548
ENSMUSG00000004788	244	230	194	213	135	133	181	368	346	224	460	192	251
ENSMUSG00000004789	2805	2414	2775	3207	2107	2740	1584	1772	4213	2341	3925	2504	3355
ENSMUSG00000004791	0	0	0	0	0	1	0	0	4	0	1	0	0
ENSMUSG00000004798	1189	725	1035	477	585	637	679	810	1703	546	841	869	937
ENSMUSG00000004814	16	9	19	15	10	11	15	28	58	9	5	6	9
ENSMUSG00000004815	327	172	302	401	345	468	199	245	511	83	123	118	150
ENSMUSG00000004821	0	0	0	0	0	0	0	0	0	0	0	0	0
ENSMUSG00000004837	40	38	33	23	15	26	41	37	45	25	27	28	27
ENSMUSG00000004842	0	0	1	1	0	0	0	0	0	0	0	0	0
ENSMUSG00000004843	405	314	414	221	203	221	272	259	508	77	118	124	167
ENSMUSG00000004846	314	263	259	331	204	254	253	285	388	224	383	218	248
ENSMUSG00000004849	332	354	272	282	158	194	501	329	503	268	488	321	400
ENSMUSG00000004864	3	3	0	6	2	2	0	1	1	1	1	1	1
ENSMUSG00000004865	337	290	294	246	241	358	332	374	762	140	205	134	229
ENSMUSG00000004872	0	0	1	0	0	0	0	0	0	0	0	0	0
ENSMUSG00000004880	209	186	220	107	99	123	94	94	232	36	37	47	58
ENSMUSG00000004885	0	0	0	0	0	1	0	2	0	0	0	0	0
ENSMUSG00000004891	53	34	37	12	15	10	4	31	18	2	14	6	6
ENSMUSG00000004892	0	2	0	0	0	0	0	0	0	0	0	0	0
ENSMUSG00000004894	0	0	0	0	0	0	0	0	0	0	0	0	0
ENSMUSG00000004895	398	312	261	310	180	214	263	275	387	258	430	227	243
ENSMUSG00000004896	154	118	117	130	89	98	131	130	122	69	131	93	97
ENSMUSG00000004897	2422	2609	2195	1223	894	921	1991	2034	3090	1062	2150	1129	1082
ENSMUSG00000004902	8	1	4	7	6	9	3	4	3	1	1	1	2
ENSMUSG00000004929	97	89	70	178	120	127	136	117	166	55	127	83	79
ENSMUSG00000004931	408	351	276	436	243	353	478	431	354	388	682	281	377
ENSMUSG00000004933	1	2	2	4	1	1	14	7	11	4	3	0	2
ENSMUSG00000004934	147	161	128	166	90	117	145	105	149	99	189	74	106
ENSMUSG00000004936	643	502	661	447	369	456	464	710	1042	247	419	328	553
ENSMUSG00000004937	956	938	777	796	388	487	689	790	998	1008	1847	970	1084
ENSMUSG00000004939	0	0	0	0	0	0	0	0	0	0	0	0	0
ENSMUSG00000004945	439	302	250	300	225	254	274	239	347	135	193	113	139
ENSMUSG00000004947	51	58	61	79	37	53	44	54	65	61	159	63	97
ENSMUSG00000004948	0	0	0	0	0	0	0	0	1	0	0	0	0
ENSMUSG00000004951	169	150	187	13	8	8	29	88	28	40	81	18	47
ENSMUSG00000004952	18	13	29	19	9	6	59	16	52	4	13	7	17
ENSMUSG00000004961	2	2	0	1	1	2	0	2	2	0	2	0	1
ENSMUSG00000004980	4090	3983	4149	2783	2771	3327	1411	2215	3802	945	2030	1504	1756
ENSMUSG00000004988	1	0	0	0	0	1	0	1	1	0	0	0	0
ENSMUSG00000004994	68	67	63	68	45	58	37	73	88	47	76	46	54
ENSMUSG00000004996	215	244	193	160	90	72	239	160	275	91	159	147	180
ENSMUSG00000005034	765	515	674	487	440	454	347	411	746	268	463	346	478
ENSMUSG00000005043	82	78	108	170	100	138	165	214	392	81	83	56	111
ENSMUSG00000005045	1	0	0	1	0	0	0	1	0	0	0	0	0
ENSMUSG00000005054	315	367	307	189	184	164	367	567	659	312	442	322	394
ENSMUSG00000005057	10	17	15	11	12	7	14	31	26	11	14	14	6
ENSMUSG00000005069	2408	1637	1931	1766	1361	1459	1641	1290	2636	702	1446	1277	1642
ENSMUSG00000005078	210	175	201	195	109	123	179	160	248	130	152	107	181
ENSMUSG00000005087	94	39	64	38	28	27	34	49	130	52	100	50	94
ENSMUSG00000005089	2334	1449	1811	1884	1512	1768	370	562	1170	384	758	467	445
ENSMUSG00000005102	147	64	119	118	134	137	50	82	144	65	99	88	84
ENSMUSG00000005103	669	592	677	485	336	383	538	488	925	326	597	421	523
ENSMUSG00000005107	592	359	560	1302	744	888	725	868	1684	920	1370	905	1083
ENSMUSG00000005124	21	18	19	10	8	3	20	26	24	2	15	15	27
ENSMUSG00000005125	142	255	249	63	54	48	111	63	86	347	803	180	615
ENSMUSG00000005131	0	1	2	0	0	2	0	0	2	0	0	0	0
ENSMUSG00000005142	1191	955	1168	1158	616	697	1380	1284	2017	555	902	497	625
ENSMUSG00000005148	0	1	1	3	1	1	0	0	1	3	2	3	2
ENSMUSG00000005150	151	131	117	133	84	104	134	211	211	127	212	157	195
ENSMUSG00000005161	639	715	658	524	323	413	443	350	763	325	439	350	469
ENSMUSG00000005198	822	772	787	650	564	630	262	871	754	1783	1816	529	575
ENSMUSG00000005202	0	0	0	0	1	0	0	0	0	0	0	0	0
ENSMUSG00000005204	219	301	243	189	130	182	162	218	332	80	118	92	101
ENSMUSG00000005220	5	1	4	22	27	24	7	2	9	0	0	0	0
ENSMUSG00000005225	316	221	422	182	298	312	185	195	372	44	63	54	76
ENSMUSG00000005232	2	0	0	2	2	1	0	1	6	0	0	0	0
ENSMUSG00000005233	91	33	52	29	25	22	4	9	23	15	19	11	37
ENSMUSG00000005237	5	0	5	5	1	4	6	15	3	1	1	0	1
ENSMUSG00000005251	56	52	56	91	60	99	139	94	273	35	81	57	56
ENSMUSG00000005262	361	335	380	196	190	205	172	234	351	433	725	333	524
ENSMUSG00000005267	2	0	0	2	0	1	0	0	1	2	1	2	1
ENSMUSG00000005268	923	1094	1342	999	953	835	115	286	655	331	441	302	418
ENSMUSG00000005299	1199	907	1096	1150	775	945	1009	1102	1931	642	1211	899	1254
ENSMUSG00000005312	2838	2154	2737	1464	1709	2109	1376	1452	2866	1161	1969	1089	1634
ENSMUSG00000005320	804	912	765	1064	577	791	1290	749	1436	497	829	430	442
ENSMUSG00000005338	105	61	65	134	107	92	136	149	212	95	141	84	88
ENSMUSG00000005339	0	0	0	0	0	0	0	0	0	0	0	0	0
ENSMUSG00000005354	2563	2751	2718	2714	1476	1739	1482	1895	2584	2589	5139	2498	3217
ENSMUSG00000005355	0	0	0	0	0	0	0	0	0	0	0	0	0
ENSMUSG00000005357	0	0	1	1	1	0	0	0	0	0	0	0	0
ENSMUSG00000005360	4	0	4	2	4	3	3	6	16	3	1	3	4
ENSMUSG00000005362	245	173	225	183	173	196	161	174	309	93	196	187	246
ENSMUSG00000005364	0	0	0	0	0	0	0	0	0	0	0	0	0
ENSMUSG00000005370	240	140	211	131	139	128	78	137	171	69	88	59	73
ENSMUSG00000005371	369	307	395	185	227	264	134	170	334	101	142	142	184
ENSMUSG00000005373	6292	5506	5983	7753	4167	6179	3820	5539	6656	3832	5804	1471	1970
ENSMUSG00000005374	211	193	253	538	328	415	336	279	628	202	348	236	282
ENSMUSG00000005378	158	173	132	116	63	101	94	113	109	78	135	107	125
ENSMUSG00000005397	195	145	191	118	139	126	43	127	113	90	177	72	123
ENSMUSG00000005410	32	28	34	45	36	40	45	53	96	32	33	13	33
ENSMUSG00000005413	286	134	211	105	80	69	188	421	273	149	164	150	210
ENSMUSG00000005417	1323	1060	1083	1157	927	1208	606	856	1349	510	966	570	685
ENSMUSG00000005442	448	551	434	593	327	431	629	679	801	469	908	351	274
ENSMUSG00000005447	31	32	29	38	20	24	51	47	64	106	242	120	132
ENSMUSG00000005465	16	11	20	36	18	17	19	10	31	6	14	6	4
ENSMUSG00000005469	1330	1476	1269	676	558	611	946	1067	1424	767	1590	758	1091
ENSMUSG00000005470	6	5	7	5	4	5	9	11	28	46	43	16	37
ENSMUSG00000005474	0	0	0	0	0	0	0	0	0	0	2	0	1
ENSMUSG00000005481	124	105	147	133	86	110	139	114	235	43	83	94	72
ENSMUSG00000005483	286	195	268	181	139	272	283	257	416	135	219	112	103
ENSMUSG00000005493	0	0	0	0	1	0	0	1	0	4	2	1	7
ENSMUSG00000005501	387	276	358	267	352	401	227	171	412	112	217	210	245
ENSMUSG00000005503	0	0	0	0	0	0	0	0	0	0	0	0	0
ENSMUSG00000005505	69	27	48	49	27	53	24	35	66	7	31	9	26
ENSMUSG00000005506	1770	1334	1505	1163	1290	1599	697	846	1325	661	1064	805	922
ENSMUSG00000005510	241	254	239	211	179	241	257	414	398	213	243	192	274
ENSMUSG00000005514	536	355	466	1306	230	273	432	372	624	1268	2525	1196	769
ENSMUSG00000005533	2	5	3	8	15	22	2	6	7	8	12	9	7
ENSMUSG00000005534	1729	1134	1491	992	1373	1482	741	919	1554	730	1180	1036	1431
ENSMUSG00000005540	24	11	6	3	4	2	0	2	4	2	3	7	4
ENSMUSG00000005547	3440	3451	5727	8913	1523	2371	17	4	21	14082	36537	7474	10297
ENSMUSG00000005553	7	9	18	8	6	4	13	12	13	2	2	1	2
ENSMUSG00000005566	852	727	794	1033	551	767	917	677	1533	427	966	720	668
ENSMUSG00000005575	608	674	476	443	226	320	449	337	487	539	714	539	509
ENSMUSG00000005580	202	144	179	236	218	264	68	189	217	67	136	108	72
ENSMUSG00000005583	38	41	48	24	27	20	39	32	41	3	34	12	13
ENSMUSG00000005609	349	216	303	332	288	361	377	506	845	164	278	201	285
ENSMUSG00000005610	6483	4566	7257	4311	4411	5741	4567	4823	10080	2068	3372	2788	3218
ENSMUSG00000005611	31	22	24	48	54	61	149	184	301	17	53	26	19
ENSMUSG00000005615	1308	836	1117	787	772	843	534	890	1492	478	812	583	820
ENSMUSG00000005621	513	371	455	414	365	566	311	312	450	319	567	307	318
ENSMUSG00000005625	1260	1214	1194	771	541	697	523	1360	1471	939	2243	1201	1958
ENSMUSG00000005628	5	4	7	3	5	9	0	1	4	0	0	1	0
ENSMUSG00000005640	0	0	0	1	0	0	0	2	0	2	2	0	0
ENSMUSG00000005649	0	0	0	0	1	0	0	0	0	0	0	0	0
ENSMUSG00000005656	188	203	203	115	114	121	106	123	172	87	126	93	171
ENSMUSG00000005667	22	14	17	6	6	8	15	7	5	2	1	2	4
ENSMUSG00000005672	47	31	69	9	21	10	21	34	57	60	94	44	52
ENSMUSG00000005674	425	240	422	609	411	591	114	107	224	87	177	137	140
ENSMUSG00000005677	1205	933	1208	1221	703	949	320	608	939	415	1066	572	490
ENSMUSG00000005681	77955	102852	80312	48934	27080	35510	29515	55197	97044	81844	166593	94408	99715
ENSMUSG00000005682	452	343	468	506	472	516	441	485	847	359	585	287	416
ENSMUSG00000005683	2324	2299	2304	950	911	1018	1621	2481	3562	1224	2387	1260	1859
ENSMUSG00000005686	13	10	16	16	9	21	6	3	5	8	9	5	3
ENSMUSG00000005687	310	300	295	216	138	177	153	204	294	197	439	234	332
ENSMUSG00000005696	0	1	0	0	0	0	0	0	0	0	0	0	0
ENSMUSG00000005698	420	315	455	318	281	363	324	266	521	114	167	137	210
ENSMUSG00000005699	39	52	47	21	17	26	24	25	26	27	75	35	41
ENSMUSG00000005705	2	0	0	3	3	4	11	8	4	5	3	0	4
ENSMUSG00000005716	0	0	0	0	0	0	0	0	0	0	0	0	0
ENSMUSG00000005718	60	75	58	100	60	55	61	64	48	58	139	65	68
ENSMUSG00000005732	249	328	290	140	106	139	214	162	308	188	326	126	167
ENSMUSG00000005763	0	0	0	0	0	0	0	0	0	0	0	0	2
ENSMUSG00000005774	175	171	205	85	99	92	78	93	174	71	119	75	121
ENSMUSG00000005779	1278	1362	1190	752	529	644	605	925	958	1137	1880	1126	1454
ENSMUSG00000005800	2	1	0	0	0	0	0	0	0	1	4	3	2
ENSMUSG00000005802	202	104	170	95	109	124	98	112	255	48	44	43	80
ENSMUSG00000005803	2154	1931	2411	1954	1570	1722	664	666	1448	1244	2537	1613	2102
ENSMUSG00000005804	287	176	223	224	187	236	218	244	476	215	340	218	340
ENSMUSG00000005813	458	349	522	381	351	481	242	290	531	231	395	287	432
ENSMUSG00000005823	359	271	323	277	254	266	111	117	190	387	777	434	618
ENSMUSG00000005824	6	4	1	0	1	1	6	2	1	1	1	4	4
ENSMUSG00000005836	74	74	98	59	58	73	51	38	28	50	85	52	57
ENSMUSG00000005846	654	576	666	301	205	320	257	433	372	460	627	291	455
ENSMUSG00000005864	0	0	0	0	0	0	0	0	0	0	0	0	0
ENSMUSG00000005871	410	233	362	220	333	384	207	326	424	227	358	258	358
ENSMUSG00000005873	199	163	150	366	305	329	310	266	618	25	54	48	63
ENSMUSG00000005881	799	744	676	914	521	678	814	791	1570	582	1033	702	713
ENSMUSG00000005882	317	278	325	257	174	223	204	171	339	268	473	275	356
ENSMUSG00000005883	0	0	0	1	1	1	0	1	3	0	0	0	0
ENSMUSG00000005886	688	405	550	510	581	610	242	379	554	246	457	403	428
ENSMUSG00000005891	0	0	0	0	0	0	0	0	0	0	0	0	0
ENSMUSG00000005892	0	0	0	0	0	0	0	0	0	0	0	0	0
ENSMUSG00000005893	54	24	25	41	156	157	1	60	27	22	41	83	93
ENSMUSG00000005897	314	238	285	156	169	172	191	172	318	102	139	79	123
ENSMUSG00000005899	208	212	243	182	163	190	206	230	399	172	300	152	230
ENSMUSG00000005907	340	250	316	211	282	340	291	461	567	130	263	197	291
ENSMUSG00000005917	0	0	0	0	0	0	0	0	0	0	0	0	0
ENSMUSG00000005936	521	450	516	589	488	580	475	502	1006	104	222	165	242
ENSMUSG00000005947	7	10	6	8	4	1	0	4	3	0	3	8	6
ENSMUSG00000005949	244	207	247	220	156	189	175	247	363	142	303	150	194
ENSMUSG00000005950	0	1	1	4	8	5	0	0	0	2	3	2	3
ENSMUSG00000005951	1051	861	1053	917	618	687	419	467	879	407	812	466	513
ENSMUSG00000005952	0	1	3	0	0	2	6	7	12	3	11	11	17
ENSMUSG00000005958	3	7	2	9	2	4	0	9	4	5	14	4	9
ENSMUSG00000005968	100	109	60	106	65	110	42	61	94	11	33	17	23
ENSMUSG00000005973	84	67	80	95	103	61	98	115	203	126	202	160	211
ENSMUSG00000005980	25	9	11	2	7	4	8	15	14	3	1	2	1
ENSMUSG00000005981	2046	1331	1704	1881	1409	1703	1061	1005	1793	1516	3030	2283	2740
ENSMUSG00000005982	223	148	223	234	162	182	130	131	219	235	412	151	173
ENSMUSG00000005983	0	1	3	2	2	1	0	1	3	9	38	15	19
ENSMUSG00000005986	5	0	6	5	13	7	0	4	4	1	0	2	2
ENSMUSG00000005994	0	0	0	0	0	0	0	0	0	0	0	0	0
ENSMUSG00000006005	658	388	571	451	580	571	328	546	728	269	479	291	382
ENSMUSG00000006007	0	0	0	0	0	0	0	0	0	0	0	0	0
ENSMUSG00000006010	512	345	429	265	315	347	272	264	622	137	308	233	315
ENSMUSG00000006014	278	314	329	427	364	373	145	156	327	232	602	326	445
ENSMUSG00000006019	140	122	126	231	111	168	69	95	143	73	148	78	85
ENSMUSG00000006021	182	146	125	124	79	75	118	107	206	109	210	163	176
ENSMUSG00000006024	893	1103	928	696	368	495	697	709	1170	640	1335	674	765
ENSMUSG00000006050	732	672	762	446	301	400	378	526	856	305	510	386	456
ENSMUSG00000006056	0	0	0	0	0	0	0	0	0	0	0	0	0
ENSMUSG00000006057	211	350	232	290	140	162	299	202	448	380	403	283	393
ENSMUSG00000006058	177	176	163	213	171	231	129	112	251	341	527	393	512
ENSMUSG00000006095	244	241	174	108	93	112	97	196	181	135	162	132	168
ENSMUSG00000006127	246	178	229	241	128	178	176	148	269	84	232	109	164
ENSMUSG00000006134	401	238	388	287	352	388	262	357	410	164	249	162	232
ENSMUSG00000006143	0	0	0	0	0	0	0	0	0	0	0	0	0
ENSMUSG00000006154	17	11	5	2	0	0	0	1	1	1	1	0	2
ENSMUSG00000006169	879	756	1026	605	568	668	713	715	1129	516	1146	567	1082
ENSMUSG00000006179	0	0	0	0	0	0	0	0	0	2	6	4	8
ENSMUSG00000006191	48	42	74	49	70	51	81	40	50	32	57	47	41
ENSMUSG00000006200	0	0	0	0	0	0	0	0	0	0	0	0	0
ENSMUSG00000006204	0	0	0	0	0	0	0	0	0	0	0	0	0
ENSMUSG00000006205	28	26	21	91	28	39	26	46	29	3	11	7	9
ENSMUSG00000006215	134	141	118	183	97	164	94	95	127	119	204	126	168
ENSMUSG00000006216	0	0	0	1	0	0	4	1	1	0	0	0	0
ENSMUSG00000006218	45	40	43	75	36	72	1206	762	1350	220	476	292	282
ENSMUSG00000006219	19	11	26	5	9	9	22	27	31	11	34	8	10
ENSMUSG00000006221	0	0	1	3	0	0	0	4	0	0	41	0	1
ENSMUSG00000006235	18	13	10	35	12	12	31	42	57	32	55	38	27
ENSMUSG00000006241	65	49	78	72	49	80	8	30	39	30	42	35	36
ENSMUSG00000006262	961	634	937	379	546	538	397	363	688	258	431	449	482
ENSMUSG00000006269	0	0	0	0	1	1	0	1	0	0	0	0	0
ENSMUSG00000006270	0	0	0	0	0	0	0	0	0	0	0	0	0
ENSMUSG00000006273	644	491	583	440	299	363	287	267	685	236	361	333	475
ENSMUSG00000006276	132	123	123	148	145	167	80	125	203	176	255	110	130
ENSMUSG00000006281	192	144	202	134	234	259	105	140	199	120	170	130	225
ENSMUSG00000006288	72	64	70	78	56	57	45	49	97	3	11	17	18
ENSMUSG00000006289	59	62	77	88	51	62	82	108	185	54	134	66	85
ENSMUSG00000006299	1577	1467	1212	1666	812	1063	938	1154	1438	737	1549	1341	1339
ENSMUSG00000006301	770	774	786	288	245	265	479	623	753	702	1263	615	765
ENSMUSG00000006304	973	877	890	480	412	421	642	643	1123	627	841	480	728
ENSMUSG00000006307	433	409	428	588	399	588	267	367	569	385	526	226	259
ENSMUSG00000006310	15	12	9	3	1	6	7	25	12	4	6	2	12
ENSMUSG00000006311	0	0	0	0	0	0	0	0	2	4	1	0	0
ENSMUSG00000006313	0	0	1	0	0	0	0	2	1	1	4	1	0
ENSMUSG00000006315	824	773	758	701	425	522	360	371	708	473	1006	559	644
ENSMUSG00000006333	991	1118	704	693	367	404	429	338	495	1226	2310	1473	2007
ENSMUSG00000006335	131	138	114	91	45	42	81	91	101	51	102	64	75
ENSMUSG00000006342	34	20	32	38	13	22	17	44	33	94	253	37	78
ENSMUSG00000006344	23	24	22	19	12	8	59	50	44	54	129	72	70
ENSMUSG00000006345	2	1	1	1	0	3	5	4	6	0	0	0	0
ENSMUSG00000006356	933	1136	935	822	491	844	680	1459	1193	945	2025	563	1442
ENSMUSG00000006360	13	26	14	33	8	6	11	28	32	33	114	22	52
ENSMUSG00000006362	40	47	37	9	21	11	45	68	55	30	47	22	28
ENSMUSG00000006369	12	7	11	35	7	14	79	32	53	9	47	7	12
ENSMUSG00000006373	19429	12957	19840	11008	10002	11218	8211	8948	19374	5841	10726	8008	10142
ENSMUSG00000006378	925	685	639	362	213	224	88	90	149	206	431	267	364
ENSMUSG00000006386	144	76	123	90	104	94	80	82	184	72	100	79	112
ENSMUSG00000006389	1	0	0	0	0	1	0	0	1	0	0	0	0
ENSMUSG00000006390	665	613	635	559	637	640	816	868	1486	1260	2524	1315	1468
ENSMUSG00000006392	453	510	463	259	241	303	279	313	577	167	305	218	311
ENSMUSG00000006398	6	1	6	6	4	3	3	19	26	51	82	19	66
ENSMUSG00000006403	2	1	4	2	4	3	6	19	10	3	0	0	2
ENSMUSG00000006411	1	3	3	4	0	1	6	9	13	0	4	0	2
ENSMUSG00000006412	313	347	281	285	165	215	123	164	374	116	212	93	138
ENSMUSG00000006418	1174	938	950	897	639	731	521	606	984	269	514	310	390
ENSMUSG00000006435	2	1	4	7	3	5	8	0	4	5	9	9	7
ENSMUSG00000006442	175	203	174	316	167	229	430	248	459	290	383	198	192
ENSMUSG00000006445	259	329	264	107	227	423	203	586	477	295	423	260	324
ENSMUSG00000006456	252	187	195	159	125	200	213	247	260	167	279	155	162
ENSMUSG00000006457	0	0	0	1	0	4	0	0	0	0	0	0	0
ENSMUSG00000006463	44	45	62	56	31	43	31	23	52	41	52	37	33
ENSMUSG00000006464	10	16	20	30	22	24	17	20	49	39	84	36	57
ENSMUSG00000006469	0	0	0	0	0	0	0	0	0	0	0	0	0
ENSMUSG00000006471	289	250	273	269	144	234	146	187	328	168	331	181	202
ENSMUSG00000006476	1983	2008	1713	1710	1095	1398	1832	1431	1966	795	1390	910	1112
ENSMUSG00000006488	0	0	0	0	0	0	0	0	0	0	0	0	0
ENSMUSG00000006490	0	0	0	0	0	0	0	0	0	0	0	0	0
ENSMUSG00000006494	1788	1164	1533	710	698	742	617	786	1527	439	790	591	989
ENSMUSG00000006498	1169	1334	1215	935	568	682	698	962	993	788	1172	488	484
ENSMUSG00000006517	659	674	571	224	327	199	779	1071	1484	904	2092	1002	1490
ENSMUSG00000006519	52	36	38	37	21	17	14	96	42	52	47	24	34
ENSMUSG00000006522	8011	6702	7592	8747	8259	9898	11161	11681	24672	10954	21540	15388	19254
ENSMUSG00000006526	153	122	145	179	91	71	94	105	236	72	96	87	101
ENSMUSG00000006527	451	279	400	303	403	463	322	390	759	190	420	336	353
ENSMUSG00000006529	7828	6063	7832	7207	6796	7984	6851	8292	15192	7273	14277	8222	8988
ENSMUSG00000006538	26	33	46	5	18	5	25	53	42	46	65	27	6
ENSMUSG00000006542	2	4	3	0	3	5	0	3	6	3	6	5	8
ENSMUSG00000006546	0	0	0	0	0	0	0	0	0	0	0	0	0
ENSMUSG00000006567	522	380	539	403	369	390	332	498	683	94	180	180	174
ENSMUSG00000006570	0	0	0	0	0	0	0	0	0	0	0	0	0
ENSMUSG00000006574	3	4	1	0	0	1	0	5	14	4	10	11	3
ENSMUSG00000006575	168	198	140	110	72	82	142	195	289	144	333	278	261
ENSMUSG00000006576	15	7	7	5	8	6	2	5	5	4	2	2	1
ENSMUSG00000006585	38	31	48	40	28	24	89	77	82	8	2	0	4
ENSMUSG00000006586	2	3	5	6	5	2	1	3	1	2	2	3	3
ENSMUSG00000006587	2	0	0	6	3	0	0	1	1	17	14	9	8
ENSMUSG00000006589	247	348	338	371	152	224	1037	1938	1294	13	29	6	14
ENSMUSG00000006599	337	230	330	214	194	234	243	224	420	117	165	124	148
ENSMUSG00000006611	695	478	645	731	537	622	356	399	771	154	281	228	377
ENSMUSG00000006641	87	62	78	144	63	66	218	206	444	84	215	122	120
ENSMUSG00000006642	3	2	1	0	0	0	5	2	1	0	1	1	1
ENSMUSG00000006649	0	0	0	0	0	0	0	0	0	0	0	0	0
ENSMUSG00000006651	6	7	7	8	3	3	4	2	0	14	30	9	13
ENSMUSG00000006673	586	449	556	627	568	652	389	575	829	396	605	368	479
ENSMUSG00000006675	1	3	2	5	0	0	0	1	2	3	2	0	0
ENSMUSG00000006676	868	642	799	1009	629	830	596	646	932	489	1015	543	711
ENSMUSG00000006678	37	24	33	39	57	51	42	18	44	13	24	25	33
ENSMUSG00000006699	2015	1691	2136	1205	1101	1284	1662	1320	2815	750	1266	894	1221
ENSMUSG00000006705	175	186	201	150	189	194	118	89	203	104	130	122	129
ENSMUSG00000006711	165	102	133	107	154	123	65	43	97	10	11	14	19
ENSMUSG00000006715	54	52	68	26	13	15	34	34	89	24	44	36	48
ENSMUSG00000006717	590	621	556	117	141	138	333	837	866	393	756	425	643
ENSMUSG00000006720	2	1	3	4	4	5	6	6	10	2	1	0	1
ENSMUSG00000006724	1	0	0	3	1	3	0	1	6	2	1	1	0
ENSMUSG00000006728	301	372	287	248	119	185	205	224	342	147	283	171	178
ENSMUSG00000006731	1333	1631	1522	1360	754	920	1384	795	1344	8	22	7	11
ENSMUSG00000006732	112	165	115	84	68	80	69	79	253	105	182	109	122
ENSMUSG00000006736	1955	1499	1740	872	717	820	1833	1623	2881	717	1587	1263	1511
ENSMUSG00000006740	405	293	418	219	404	426	123	188	303	66	124	154	219
ENSMUSG00000006763	45	35	68	88	67	89	34	39	89	25	45	35	52
ENSMUSG00000006764	0	0	0	0	0	0	0	0	0	1	0	1	1
ENSMUSG00000006777	30	25	33	269	138	130	427	421	463	73	433	162	113
ENSMUSG00000006782	56	49	57	47	35	31	42	38	41	22	47	33	65
ENSMUSG00000006784	7	2	8	7	2	6	28	37	33	2	7	4	3
ENSMUSG00000006800	142	151	195	906	451	451	232	288	599	1078	1984	799	939
ENSMUSG00000006818	2750	2506	2500	1954	1760	2189	1651	2003	3536	1075	2082	1669	1920
ENSMUSG00000006850	111	108	84	54	47	50	28	50	38	36	56	37	38
ENSMUSG00000006906	262	252	294	130	117	120	95	146	267	139	279	128	185
ENSMUSG00000006920	219	209	208	236	137	251	133	166	271	94	188	124	142
ENSMUSG00000006930	28	28	26	37	16	9	1	10	16	4	7	2	3
ENSMUSG00000006931	8	5	2	6	6	13	9	5	12	0	2	0	4
ENSMUSG00000006932	2495	1698	2569	2682	2767	3187	2252	2664	4793	1581	2604	2061	3116
ENSMUSG00000006941	198	217	194	117	117	125	179	178	235	124	203	129	170
ENSMUSG00000006948	0	0	0	0	0	0	0	0	0	0	0	0	0
ENSMUSG00000006958	71	67	51	79	55	58	25	30	70	28	64	38	36
ENSMUSG00000006998	1471	1124	1042	835	769	802	831	1104	1776	566	1049	686	938
ENSMUSG00000007021	3	0	0	2	5	6	210	188	284	3	0	0	0
ENSMUSG00000007029	389	365	307	428	193	293	383	252	457	229	416	317	316
ENSMUSG00000007030	3	7	4	4	9	3	21	25	39	0	2	0	0
ENSMUSG00000007033	31	27	33	22	23	30	8	0	12	1	2	2	5
ENSMUSG00000007034	3	6	5	5	8	3	0	4	2	4	4	6	2
ENSMUSG00000007035	13	10	12	28	19	24	27	21	45	1	1	1	4
ENSMUSG00000007036	318	255	257	349	163	245	198	132	175	148	310	160	190
ENSMUSG00000007038	490	477	412	718	423	538	333	212	300	261	392	247	255
ENSMUSG00000007039	22	35	23	41	12	23	10	28	32	23	28	15	30
ENSMUSG00000007041	209	240	183	120	95	102	186	195	292	110	182	91	133
ENSMUSG00000007050	114	176	166	100	43	49	142	108	183	152	209	134	197
ENSMUSG00000007080	26	7	18	51	46	68	15	15	32	61	66	37	52
ENSMUSG00000007097	14	10	12	30	4	12	2	3	8	3	19	1	2
ENSMUSG00000007107	3	0	0	0	0	0	0	0	0	0	0	0	0
ENSMUSG00000007122	2	2	2	1	1	1	0	0	4	0	0	0	0
ENSMUSG00000007207	9	14	7	8	8	3	7	3	8	3	5	4	5
ENSMUSG00000007209	0	0	0	0	0	0	0	0	1	0	0	0	0
ENSMUSG00000007216	41	29	27	67	30	41	24	35	47	36	94	69	95
ENSMUSG00000007279	0	0	0	0	0	0	0	0	0	0	0	0	0
ENSMUSG00000007338	429	515	558	328	260	345	287	384	462	183	303	229	235
ENSMUSG00000007379	6	2	6	3	4	4	8	8	14	3	3	6	3
ENSMUSG00000007411	500	440	507	447	332	398	379	365	693	165	250	225	296
ENSMUSG00000007415	248	221	263	121	115	132	92	136	228	207	332	136	160
ENSMUSG00000007440	0	0	0	0	0	0	0	0	0	0	0	0	0
ENSMUSG00000007457	0	0	0	0	0	0	0	0	0	0	0	0	0
ENSMUSG00000007458	1250	957	1156	487	436	503	482	582	655	190	347	270	297
ENSMUSG00000007476	1106	837	868	989	643	824	665	881	1177	974	1733	980	1187
ENSMUSG00000007480	0	0	0	0	0	0	0	0	0	0	0	0	0
ENSMUSG00000007564	770	812	782	841	457	602	787	1045	1443	637	1237	718	947
ENSMUSG00000007570	127	121	85	156	61	119	117	122	152	62	125	58	67
ENSMUSG00000007589	165	173	148	101	71	92	117	131	185	28	60	33	58
ENSMUSG00000007591	6	5	3	12	13	11	0	0	2	2	0	0	0
ENSMUSG00000007594	194	195	215	303	286	276	204	166	323	0	3	1	2
ENSMUSG00000007603	188	189	195	263	138	148	236	195	242	137	218	136	184
ENSMUSG00000007610	67	86	50	246	162	235	149	271	248	43	153	58	86
ENSMUSG00000007613	418	297	410	280	297	400	295	424	822	175	251	237	266
ENSMUSG00000007617	72	28	42	20	62	48	41	26	55	19	28	28	51
ENSMUSG00000007646	3	6	3	1	3	14	5	1	2	6	2	4	6
ENSMUSG00000007653	0	0	0	0	0	0	0	0	0	0	0	0	0
ENSMUSG00000007655	222	67	107	46	44	40	62	56	168	10	36	9	15
ENSMUSG00000007656	603	659	626	270	305	379	374	247	672	259	431	270	400
ENSMUSG00000007659	411	476	498	431	310	316	383	307	554	542	1257	513	316
ENSMUSG00000007670	720	972	754	639	326	434	677	757	726	711	913	410	399
ENSMUSG00000007682	0	0	0	0	0	0	0	0	0	0	1	0	0
ENSMUSG00000007721	484	471	365	292	157	194	447	446	394	509	1070	516	512
ENSMUSG00000007739	1182	899	1155	802	669	808	683	759	1380	513	964	864	1002
ENSMUSG00000007777	204	180	240	77	126	184	102	186	259	53	90	89	133
ENSMUSG00000007783	9	7	6	17	4	10	2	6	7	4	6	1	1
ENSMUSG00000007805	1	0	1	0	0	0	0	0	0	1	4	0	0
ENSMUSG00000007812	554	309	329	357	312	353	164	135	285	94	190	135	205
ENSMUSG00000007815	2420	2284	2009	1021	845	910	1179	1260	2374	507	888	759	960
ENSMUSG00000007817	542	483	630	641	504	491	461	557	1013	555	885	340	504
ENSMUSG00000007827	41	6	30	14	45	45	21	47	45	9	23	12	19
ENSMUSG00000007833	875	804	588	432	183	239	480	460	559	233	523	349	400
ENSMUSG00000007836	820	893	734	445	277	316	666	408	578	254	392	219	326
ENSMUSG00000007837	385	323	297	338	204	218	406	352	328	328	652	357	364
ENSMUSG00000007850	908	685	806	603	623	872	330	481	776	193	377	283	383
ENSMUSG00000007867	11	19	23	11	3	5	16	6	24	8	22	5	8
ENSMUSG00000007872	854	569	530	553	284	220	544	1039	733	207	219	140	186
ENSMUSG00000007877	0	1	0	1	0	0	0	0	0	0	3	0	0
ENSMUSG00000007880	527	371	519	693	589	702	212	618	542	885	1007	354	490
ENSMUSG00000007888	2	1	0	1	0	0	0	0	0	2	4	4	4
ENSMUSG00000007891	4730	3971	3989	3393	2091	2276	2828	3320	5045	3804	7594	3618	4948
ENSMUSG00000007892	3066	4479	3216	964	533	508	1223	7882	2181	383	387	295	351
ENSMUSG00000007907	0	0	0	0	0	0	0	0	0	0	0	0	0
ENSMUSG00000007908	1	0	0	0	1	2	3	0	0	0	0	0	1
ENSMUSG00000007944	0	0	0	0	0	0	0	0	0	0	0	0	0
ENSMUSG00000007946	0	0	0	0	0	0	0	0	0	0	0	0	0
ENSMUSG00000007950	47	39	37	70	52	68	129	94	62	23	37	36	68
ENSMUSG00000007987	32	44	24	20	11	8	20	28	31	20	22	20	14
ENSMUSG00000007989	1	1	2	1	5	0	0	1	2	2	5	4	5
ENSMUSG00000008028	1	1	1	5	1	4	1	7	1	2	4	2	5
ENSMUSG00000008035	210	192	216	165	95	72	372	342	293	233	375	183	128
ENSMUSG00000008036	606	692	487	532	207	302	621	601	751	471	808	542	590
ENSMUSG00000008090	571	504	539	870	341	312	334	333	486	452	949	625	514
ENSMUSG00000008129	0	1	1	0	2	0	0	1	1	3	3	2	3
ENSMUSG00000008136	13	3	7	8	7	9	3	15	4	6	13	2	11
ENSMUSG00000008140	744	711	635	746	330	421	821	636	687	1078	1843	693	895
ENSMUSG00000008153	588	231	270	3	20	3	9	15	22	6	38	11	21
ENSMUSG00000008167	293	321	350	189	146	151	391	499	637	49	93	54	87
ENSMUSG00000008193	8	7	11	6	5	4	3	4	6	1	2	2	3
ENSMUSG00000008200	387	268	318	287	271	330	129	216	322	243	367	192	209
ENSMUSG00000008206	22	35	40	39	31	31	12	13	20	3	12	5	4
ENSMUSG00000008226	856	588	820	276	335	307	302	345	658	131	138	133	173
ENSMUSG00000008301	190	208	241	158	122	150	171	129	267	129	246	162	189
ENSMUSG00000008305	453	327	408	614	300	358	471	451	745	242	552	306	354
ENSMUSG00000008307	5	7	5	6	9	4	0	3	1	3	1	3	6
ENSMUSG00000008318	4	2	4	2	4	4	0	5	1	1	1	0	1
ENSMUSG00000008333	101	123	120	37	42	40	65	64	94	43	54	53	65
ENSMUSG00000008348	3004	2796	2879	1523	1226	1862	4448	3413	9821	2585	8042	5101	6193
ENSMUSG00000008373	146	176	157	136	104	123	72	149	217	108	205	134	169
ENSMUSG00000008384	47	79	50	45	24	22	73	43	58	104	123	59	36
ENSMUSG00000008393	1399	1329	1455	830	592	671	676	551	1297	331	495	362	454
ENSMUSG00000008398	167	107	149	110	89	82	85	96	162	83	144	62	76
ENSMUSG00000008429	495	375	449	276	240	246	311	301	476	193	341	234	299
ENSMUSG00000008435	53	14	34	111	75	104	31	34	56	18	27	11	33
ENSMUSG00000008438	0	2	1	0	0	1	0	0	3	0	2	2	4
ENSMUSG00000008450	30	44	40	21	21	30	177	160	326	214	265	188	196
ENSMUSG00000008461	6	8	0	5	4	4	9	8	22	0	1	1	0
ENSMUSG00000008475	1129	921	1102	443	420	455	459	438	883	153	218	177	226
ENSMUSG00000008482	1	0	1	0	0	3	0	0	0	0	0	0	0
ENSMUSG00000008489	0	2	0	0	0	0	0	0	0	0	0	0	0
ENSMUSG00000008496	5	0	1	2	1	1	0	1	2	4	1	1	2
ENSMUSG00000008540	56710	49848	57069	27788	27465	33480	14718	26455	36722	9467	18305	16799	20317
ENSMUSG00000008575	1566	1241	1367	802	1032	1091	508	583	863	544	1122	815	824
ENSMUSG00000008590	0	0	0	0	0	0	0	0	0	0	0	0	0
ENSMUSG00000008601	4	8	5	2	2	0	5	1	3	7	6	1	6
ENSMUSG00000008604	607	546	570	495	403	568	427	471	794	283	444	257	305
ENSMUSG00000008658	0	0	0	0	0	0	0	0	0	0	0	0	0
ENSMUSG00000008668	380	321	374	2	0	0	0	2	2	27	31	12	17
ENSMUSG00000008682	42	45	50	0	1	0	4	3	1	1	2	0	2
ENSMUSG00000008683	115	175	133	66	68	82	81	182	239	60	90	88	146
ENSMUSG00000008690	285	232	294	230	137	171	271	303	444	131	243	214	204
ENSMUSG00000008730	1008	651	973	1281	1476	1826	459	711	1203	312	607	484	648
ENSMUSG00000008734	39	7	12	11	14	8	7	6	8	2	3	3	5
ENSMUSG00000008763	446	323	472	227	303	340	269	345	634	119	276	247	253
ENSMUSG00000008789	0	0	0	0	0	0	0	0	0	0	0	0	0
ENSMUSG00000008813	1	0	2	0	3	1	0	2	1	0	0	1	1
ENSMUSG00000008822	52	53	58	6	8	16	39	43	47	46	81	49	60
ENSMUSG00000008843	0	0	0	0	0	0	0	2	0	0	0	0	0
ENSMUSG00000008845	136	53	63	76	61	70	0	17	15	4	4	2	0
ENSMUSG00000008855	601	580	508	623	367	515	706	549	723	234	468	254	347
ENSMUSG00000008859	388	351	413	153	196	240	196	211	483	164	311	202	262
ENSMUSG00000008874	0	0	0	0	0	0	0	0	0	0	0	0	0
ENSMUSG00000008892	301	347	313	179	156	219	137	211	408	113	205	214	265
ENSMUSG00000008932	0	0	1	3	2	2	0	3	0	8	11	5	2
ENSMUSG00000008958	154	167	133	79	46	67	94	128	161	190	209	119	171
ENSMUSG00000008976	675	425	647	424	422	480	160	182	316	139	314	257	287
ENSMUSG00000008999	34	21	32	62	23	40	252	158	364	122	225	117	117
ENSMUSG00000009013	101	124	111	48	58	97	58	63	132	50	56	38	53
ENSMUSG00000009030	330	271	311	197	188	209	154	232	320	71	119	160	197
ENSMUSG00000009035	513	461	515	370	245	219	516	511	501	544	1343	517	484
ENSMUSG00000009047	0	0	0	0	0	0	0	0	0	0	0	0	0
ENSMUSG00000009070	0	2	0	0	0	0	0	1	1	2	0	1	0
ENSMUSG00000009073	419	389	326	492	354	548	199	242	478	191	341	240	271
ENSMUSG00000009075	4	0	2	2	1	6	0	0	0	0	0	0	0
ENSMUSG00000009076	53	59	37	17	22	20	16	30	36	52	152	66	128
ENSMUSG00000009079	743	990	1015	574	385	454	468	1307	949	758	1732	703	986
ENSMUSG00000009090	847	672	833	773	604	634	1039	1106	1782	592	1179	854	1235
ENSMUSG00000009092	29	19	45	9	8	8	8	16	12	6	63	4	7
ENSMUSG00000009093	0	0	0	0	0	0	0	0	0	0	0	0	0
ENSMUSG00000009097	2	1	0	3	3	1	0	0	0	0	0	0	0
ENSMUSG00000009108	8	6	13	20	21	29	8	12	21	30	51	50	68
ENSMUSG00000009112	624	359	496	393	374	443	402	436	644	298	477	262	404
ENSMUSG00000009114	0	0	0	1	0	0	0	0	0	0	0	0	0
ENSMUSG00000009115	38	22	40	74	75	65	16	39	17	63	90	85	75
ENSMUSG00000009145	197	190	173	310	178	255	305	219	354	245	490	248	252
ENSMUSG00000009185	1	0	1	0	0	0	0	0	0	6	21	6	16
ENSMUSG00000009207	50	26	37	13	30	23	13	21	31	5	8	14	24
ENSMUSG00000009210	2	0	2	0	0	1	0	0	0	0	1	2	3
ENSMUSG00000009214	0	0	0	0	0	0	0	0	1	0	0	0	1
ENSMUSG00000009216	0	0	0	1	1	0	0	0	0	2	2	0	1
ENSMUSG00000009246	0	0	0	3	2	3	0	0	0	0	1	0	0
ENSMUSG00000009248	0	0	0	0	0	0	0	1	0	3	1	2	2
ENSMUSG00000009281	2815	3876	3480	3111	1949	2682	1672	2157	3180	3067	8077	4175	4582
ENSMUSG00000009291	4431	3799	4245	2342	1911	2240	2306	2312	4316	1915	3276	2158	2871
ENSMUSG00000009292	65	16	31	40	42	32	9	22	42	19	18	19	39
ENSMUSG00000009293	344	335	370	407	297	452	425	542	825	166	290	215	325
ENSMUSG00000009350	1	0	0	0	0	0	2	9	3	0	0	0	0
ENSMUSG00000009356	0	0	0	0	0	0	0	0	0	0	1	0	1
ENSMUSG00000009376	814	659	965	939	1281	1401	732	888	1797	371	716	670	635
ENSMUSG00000009378	582	406	630	849	758	743	805	634	1495	201	280	391	505
ENSMUSG00000009394	1	0	1	0	0	0	0	0	0	0	0	1	0
ENSMUSG00000009406	66	68	54	44	63	80	49	88	82	80	84	54	47
ENSMUSG00000009418	92	93	76	50	64	43	148	238	280	73	91	65	115
ENSMUSG00000009470	914	620	814	674	802	852	409	508	989	239	456	451	566
ENSMUSG00000009471	0	0	0	0	0	0	0	0	0	0	0	0	0
ENSMUSG00000009487	0	0	0	0	0	0	0	0	0	0	0	0	0
ENSMUSG00000009535	214	148	226	167	135	193	86	143	237	71	137	111	145
ENSMUSG00000009545	19	9	15	8	16	10	5	13	30	8	24	12	21
ENSMUSG00000009549	357	339	369	260	196	234	229	207	492	181	305	223	320
ENSMUSG00000009555	418	324	326	472	217	298	311	300	513	126	302	190	186
ENSMUSG00000009563	395	372	343	229	163	202	492	406	549	304	703	356	406
ENSMUSG00000009566	567	421	423	498	446	593	238	564	624	195	408	233	536
ENSMUSG00000009569	166	62	122	203	481	470	83	489	320	130	145	134	266
ENSMUSG00000009575	477	378	465	347	495	515	217	311	563	74	191	149	227
ENSMUSG00000009580	0	0	0	0	0	0	0	0	0	0	0	0	0
ENSMUSG00000009585	42	19	23	19	13	11	42	16	51	16	5	16	15
ENSMUSG00000009588	0	0	0	0	0	0	0	0	0	0	0	0	0
ENSMUSG00000009596	0	0	0	0	0	0	0	2	0	0	0	0	0
ENSMUSG00000009614	13708	12161	12922	10025	4969	5093	3740	4868	10121	7586	13909	8863	9948
ENSMUSG00000009621	522	467	449	555	445	498	589	556	954	406	628	448	530
ENSMUSG00000009628	0	0	0	0	0	0	0	0	0	0	0	0	0
ENSMUSG00000009630	442	355	410	313	224	293	293	225	413	121	189	174	250
ENSMUSG00000009633	1166	1194	924	101	308	671	548	1651	678	238	364	345	1191
ENSMUSG00000009640	144	143	156	107	66	74	86	113	166	106	238	128	181
ENSMUSG00000009646	658	535	542	503	349	439	520	536	793	331	530	373	491
ENSMUSG00000009647	605	600	536	276	263	273	168	193	370	373	727	363	474
ENSMUSG00000009654	272	233	269	274	172	210	203	205	260	141	238	140	191
ENSMUSG00000009670	0	0	0	0	0	0	0	0	0	0	0	0	0
ENSMUSG00000009681	537	541	466	608	481	558	788	755	1250	433	787	469	531
ENSMUSG00000009687	35	28	23	8	9	8	4	15	12	12	40	12	16
ENSMUSG00000009731	5	4	6	1	2	5	2	5	5	4	7	4	3
ENSMUSG00000009733	85	118	116	111	86	128	149	89	251	58	95	70	95
ENSMUSG00000009734	0	0	0	0	0	0	0	1	0	0	0	0	0
ENSMUSG00000009739	104	95	101	106	59	90	108	130	272	37	47	32	38
ENSMUSG00000009741	903	726	850	607	523	690	363	386	758	439	676	372	538
ENSMUSG00000009772	135	174	216	275	178	217	231	141	334	198	255	142	77
ENSMUSG00000009828	249	243	196	366	341	397	312	358	511	194	366	152	231
ENSMUSG00000009863	2088	1952	2038	1969	1113	1445	1342	1528	2789	1551	2224	1787	2543
ENSMUSG00000009876	0	1	0	6	1	0	0	1	1	0	1	0	2
ENSMUSG00000009894	1085	800	1019	715	587	682	816	883	1849	360	679	403	532
ENSMUSG00000009900	0	0	0	0	0	0	0	0	0	0	0	0	0
ENSMUSG00000009905	493	269	285	431	377	489	649	1015	1013	229	519	387	422
ENSMUSG00000009907	244	163	210	217	206	199	221	249	453	46	59	65	96
ENSMUSG00000009927	295	279	325	480	418	491	262	565	417	232	378	272	356
ENSMUSG00000009941	0	0	0	0	0	0	0	0	0	0	0	0	0
ENSMUSG00000009995	530	554	530	405	280	322	293	283	555	216	465	221	325
ENSMUSG00000010021	4	1	2	1	1	0	38	17	25	15	22	8	23
ENSMUSG00000010025	2401	815	1554	470	623	466	1148	1302	1670	743	1646	1214	1505
ENSMUSG00000010044	5	8	2	2	0	4	1	2	2	12	26	13	8
ENSMUSG00000010045	322	255	297	376	165	218	487	349	483	265	393	232	235
ENSMUSG00000010047	667	525	489	559	271	365	852	742	755	390	733	325	579
ENSMUSG00000010048	552	429	514	318	198	217	372	300	491	263	531	369	290
ENSMUSG00000010051	368	257	339	256	336	327	306	579	759	519	1138	480	696
ENSMUSG00000010054	456	489	417	429	245	343	410	283	543	397	576	273	317
ENSMUSG00000010057	242	224	223	147	110	121	73	116	166	212	444	193	200
ENSMUSG00000010064	23584	22037	23110	31286	13129	14619	15984	13748	27535	24341	39148	20180	17438
ENSMUSG00000010066	3	0	0	0	0	0	0	1	0	1	1	2	1
ENSMUSG00000010067	25	17	14	27	15	9	15	42	62	25	43	14	37
ENSMUSG00000010080	4	9	1	1	4	4	3	1	5	2	6	0	2
ENSMUSG00000010086	0	0	0	0	0	0	0	0	0	1	0	0	0
ENSMUSG00000010095	508	545	568	390	257	292	389	680	728	392	795	488	609
ENSMUSG00000010097	470	424	405	418	352	518	232	269	469	274	415	170	246
ENSMUSG00000010110	568	649	543	631	459	500	406	485	1003	368	782	479	579
ENSMUSG00000010122	1596	1229	1492	1096	875	1039	78	89	249	591	1137	867	1125
ENSMUSG00000010136	0	0	0	0	0	0	0	0	0	0	0	0	0
ENSMUSG00000010142	2	2	5	4	0	1	2	6	7	0	1	2	2
ENSMUSG00000010154	0	0	0	0	0	0	0	0	0	9	1	5	5
ENSMUSG00000010175	975	979	1616	1042	1521	1377	1086	1173	2034	606	874	829	1046
ENSMUSG00000010205	407	467	444	333	175	172	378	360	521	303	427	160	206
ENSMUSG00000010277	1997	1394	1675	1972	2692	2923	940	1305	2321	546	859	1025	1129
ENSMUSG00000010290	171	119	129	130	142	184	72	85	155	39	63	65	90
ENSMUSG00000010307	82	97	80	98	47	56	1156	696	596	54	160	113	88
ENSMUSG00000010311	0	1	2	1	1	0	0	1	0	0	5	0	1
ENSMUSG00000010342	0	0	1	0	0	0	10	2	6	0	0	0	0
ENSMUSG00000010358	326	416	406	175	110	112	209	253	440	178	382	254	361
ENSMUSG00000010362	76	82	90	45	41	40	12	13	20	15	28	19	18
ENSMUSG00000010376	468	616	507	336	243	277	252	485	757	550	662	397	520
ENSMUSG00000010392	581	506	537	487	369	461	219	369	633	279	546	347	446
ENSMUSG00000010406	96	190	116	71	72	59	40	55	96	100	104	32	73
ENSMUSG00000010435	0	0	0	0	0	0	0	0	0	0	0	0	0
ENSMUSG00000010453	840	587	701	630	475	621	293	298	640	309	582	380	497
ENSMUSG00000010461	1	0	4	0	0	1	0	0	0	0	0	0	0
ENSMUSG00000010476	0	0	4	1	1	0	0	0	0	1	0	0	0
ENSMUSG00000010505	0	0	0	0	0	0	0	0	0	1	0	0	0
ENSMUSG00000010517	345	284	315	237	228	309	294	208	575	142	202	170	287
ENSMUSG00000010529	0	0	0	0	0	0	0	2	0	0	0	0	0
ENSMUSG00000010538	18	16	16	9	5	7	3	2	3	5	13	4	6
ENSMUSG00000010554	209	173	185	134	158	178	147	118	222	105	156	113	143
ENSMUSG00000010592	1	2	0	1	2	0	0	0	0	1	3	1	3
ENSMUSG00000010601	1671	1544	2195	709	774	779	740	701	1376	620	1188	866	904
ENSMUSG00000010607	261	239	202	278	124	156	164	319	279	202	309	199	207
ENSMUSG00000010608	776	599	689	388	456	521	353	329	564	210	431	341	352
ENSMUSG00000010609	3271	3708	2979	567	520	391	514	596	882	343	796	463	554
ENSMUSG00000010651	10106	5098	5879	2216	1676	1927	3226	4105	4265	323	737	502	539
ENSMUSG00000010660	5	3	6	7	1	5	22	28	22	7	26	12	7
ENSMUSG00000010663	10127	9965	9692	8137	6269	6273	6606	5905	10527	9088	17787	12936	12301
ENSMUSG00000010721	70	38	66	62	50	74	47	31	52	13	23	23	23
ENSMUSG00000010751	8	2	1	4	6	1	0	0	1	0	0	0	0
ENSMUSG00000010755	345	246	327	145	181	187	154	150	236	84	171	117	145
ENSMUSG00000010760	0	0	1	3	9	7	27	20	17	53	72	32	31
ENSMUSG00000010796	0	0	0	1	0	0	2	2	0	0	0	0	0
ENSMUSG00000010797	37	29	31	25	28	14	31	25	65	12	44	30	31
ENSMUSG00000010803	0	0	0	1	0	4	0	0	0	0	0	0	0
ENSMUSG00000010825	0	0	0	2	1	0	0	1	0	1	2	0	1
ENSMUSG00000010830	4	1	4	5	2	2	0	4	7	14	28	12	17
ENSMUSG00000010841	0	0	0	0	0	0	0	0	0	0	0	0	0
ENSMUSG00000010911	167	165	171	87	81	80	98	122	210	75	129	79	144
ENSMUSG00000010914	322	259	339	225	192	214	389	337	507	115	201	153	260
ENSMUSG00000010936	395	285	317	231	168	172	261	253	348	464	804	391	664
ENSMUSG00000011008	4	0	2	1	5	4	0	2	4	4	5	3	6
ENSMUSG00000011034	26	17	33	26	26	25	9	27	12	20	46	14	41
ENSMUSG00000011096	530	668	387	324	154	160	617	538	464	424	658	338	386
ENSMUSG00000011114	577	597	640	530	347	398	684	747	1158	361	668	399	564
ENSMUSG00000011118	0	0	0	0	0	0	0	0	0	0	0	0	0
ENSMUSG00000011148	195	177	178	228	81	117	223	174	312	146	270	179	188
ENSMUSG00000011154	0	0	0	0	0	0	0	0	0	0	0	0	0
ENSMUSG00000011158	161	127	131	233	139	230	92	129	155	56	93	69	113
ENSMUSG00000011171	0	1	1	0	0	0	0	0	0	0	1	0	1
ENSMUSG00000011179	245	263	343	231	208	263	63	101	279	163	379	296	325
ENSMUSG00000011254	52	49	32	41	30	20	113	109	187	33	41	21	31
ENSMUSG00000011256	30	19	19	16	28	18	3	32	54	8	29	11	19
ENSMUSG00000011257	16	9	8	0	0	0	12	14	25	0	0	0	0
ENSMUSG00000011263	99	103	99	104	53	68	69	43	127	52	73	49	56
ENSMUSG00000011267	8	6	10	2	4	6	0	1	3	2	1	2	1
ENSMUSG00000011305	458	291	362	256	196	354	414	367	387	173	341	213	260
ENSMUSG00000011306	154	203	210	164	124	123	156	180	240	160	341	125	191
ENSMUSG00000011349	0	0	0	0	0	0	0	0	1	0	0	0	0
ENSMUSG00000011382	4457	4060	3633	2383	1889	2181	2275	3195	5286	293	488	267	319
ENSMUSG00000011427	144	86	112	122	133	141	59	121	130	46	70	54	70
ENSMUSG00000011463	0	0	0	1	0	2	0	0	2	0	1	0	1
ENSMUSG00000011486	0	0	0	1	0	0	0	0	0	5	10	0	4
ENSMUSG00000011589	2	0	0	1	8	1	0	0	3	3	1	3	2
ENSMUSG00000011632	0	0	0	0	0	0	0	4	0	0	0	0	1
ENSMUSG00000011658	83	85	85	56	38	42	82	67	124	40	57	41	55
ENSMUSG00000011751	1	2	1	0	0	0	0	1	0	0	3	1	4
ENSMUSG00000011752	183	105	181	245	181	244	242	248	520	748	1525	878	1278
ENSMUSG00000011831	1755	1092	1598	680	1305	1343	791	863	1573	174	313	307	526
ENSMUSG00000011832	63	51	67	47	40	42	50	45	79	28	48	48	45
ENSMUSG00000011837	166	150	143	117	84	79	103	167	202	60	190	68	88
ENSMUSG00000011877	200	210	187	175	87	126	338	325	374	280	472	120	204
ENSMUSG00000011884	50	25	38	56	24	21	37	40	44	27	63	39	43
ENSMUSG00000011958	474	420	453	251	262	274	164	185	380	136	184	156	226
ENSMUSG00000011960	343	238	327	266	322	405	159	185	384	112	183	149	212
ENSMUSG00000012017	70	76	51	54	21	22	41	57	21	25	37	18	25
ENSMUSG00000012042	0	1	1	1	2	3	22	37	31	0	0	0	0
ENSMUSG00000012076	88	61	71	45	51	61	57	55	85	15	23	27	25
ENSMUSG00000012114	472	385	447	645	401	412	371	553	686	306	524	255	241
ENSMUSG00000012117	465	444	485	337	323	397	351	469	652	200	395	233	318
ENSMUSG00000012123	58	58	48	19	8	3	4	5	14	0	3	0	1
ENSMUSG00000012126	0	2	2	4	2	3	0	2	0	0	0	3	0
ENSMUSG00000012187	37	10	15	0	2	0	190	148	291	0	0	0	0
ENSMUSG00000012211	0	3	1	1	0	1	0	0	0	1	1	1	2
ENSMUSG00000012282	0	0	0	0	0	0	0	0	0	0	0	0	0
ENSMUSG00000012296	101	73	85	82	60	62	85	101	95	72	123	41	65
ENSMUSG00000012350	17	15	9	11	9	14	0	5	3	2	8	11	13
ENSMUSG00000012396	0	0	0	0	0	0	0	0	0	0	0	0	3
ENSMUSG00000012405	276	240	308	237	250	290	125	113	297	114	207	163	231
ENSMUSG00000012422	24	22	19	10	18	15	0	19	15	1	6	1	2
ENSMUSG00000012428	1301	841	1207	892	710	806	871	995	1549	571	821	756	778
ENSMUSG00000012429	134	120	146	41	67	74	60	86	122	41	104	66	67
ENSMUSG00000012443	14	9	15	3	7	3	5	8	22	7	6	9	18
ENSMUSG00000012483	80	69	74	41	16	33	29	114	23	66	80	45	50
ENSMUSG00000012519	56	55	54	18	8	10	40	39	74	22	19	16	19
ENSMUSG00000012520	0	0	0	0	0	0	0	0	0	0	0	0	0
ENSMUSG00000012535	529	465	515	351	388	479	267	353	590	172	349	220	335
ENSMUSG00000012609	97	82	81	82	77	77	100	98	147	122	186	107	83
ENSMUSG00000012640	20	4	10	7	22	16	2	13	16	22	18	10	15
ENSMUSG00000012705	0	1	0	0	0	0	0	0	0	0	0	0	1
ENSMUSG00000012777	12	24	7	7	7	5	4	6	17	4	7	6	11
ENSMUSG00000012819	0	0	1	0	2	1	0	3	4	0	0	0	0
ENSMUSG00000012848	1505	1534	1483	1766	1027	1295	938	1018	2285	918	1386	1235	1786
ENSMUSG00000012889	4	0	3	2	0	3	0	1	2	3	1	4	1
ENSMUSG00000013033	87	86	78	103	71	74	40	45	65	26	43	31	35
ENSMUSG00000013076	175	122	134	129	192	180	60	99	143	359	575	550	598
ENSMUSG00000013083	0	0	0	0	0	0	0	0	0	0	0	0	0
ENSMUSG00000013089	30	42	36	61	22	37	7	23	53	14	14	13	15
ENSMUSG00000013091	4	1	2	1	3	2	5	9	7	13	31	7	18
ENSMUSG00000013150	145	108	100	59	47	81	105	96	136	59	74	48	97
ENSMUSG00000013155	8	4	11	9	3	10	15	5	6	8	11	3	9
ENSMUSG00000013158	2	1	1	1	0	0	0	2	1	0	0	0	0
ENSMUSG00000013160	1034	1059	1110	877	535	610	1088	848	1833	629	1207	831	1003
ENSMUSG00000013236	60	76	77	129	76	97	164	181	239	140	192	149	160
ENSMUSG00000013275	88	109	101	274	107	145	30	30	51	74	91	59	39
ENSMUSG00000013338	0	0	0	0	0	0	0	0	0	0	0	1	0
ENSMUSG00000013353	0	0	0	0	0	0	0	0	0	0	0	0	0
ENSMUSG00000013367	7	18	14	5	3	2	6	2	0	0	12	5	3
ENSMUSG00000013415	0	0	0	0	0	0	0	0	1	0	0	0	0
ENSMUSG00000013418	2	3	1	2	1	2	2	2	2	0	0	0	0
ENSMUSG00000013419	10	14	14	21	19	15	0	8	15	3	12	2	11
ENSMUSG00000013465	363	311	354	419	276	337	321	313	650	130	252	211	259
ENSMUSG00000013483	1	1	3	10	9	13	23	35	38	2	0	2	1
ENSMUSG00000013495	85	85	97	104	72	80	116	123	230	52	78	43	65
ENSMUSG00000013523	1	0	0	0	2	0	0	0	0	0	0	0	0
ENSMUSG00000013562	0	0	0	0	1	5	0	0	0	0	0	0	0
ENSMUSG00000013584	3	0	5	6	8	0	0	1	5	4	6	3	1
ENSMUSG00000013593	2295	1878	1985	2528	1685	2041	1650	1826	2793	2593	5374	2505	3096
ENSMUSG00000013611	0	0	0	1	0	0	0	0	0	0	0	0	0
ENSMUSG00000013622	886	831	743	574	357	468	502	503	755	297	472	349	495
ENSMUSG00000013629	151	142	128	198	158	196	105	145	222	121	184	102	104
ENSMUSG00000013643	0	0	0	0	1	0	4	24	40	0	0	0	0
ENSMUSG00000013646	275	210	225	263	137	175	240	233	410	123	355	198	233
ENSMUSG00000013653	0	0	0	0	0	0	0	0	0	0	2	0	6
ENSMUSG00000013662	797	656	843	416	400	447	446	393	854	182	244	256	349
ENSMUSG00000013663	1681	1099	1708	963	1555	1533	837	944	1921	599	1043	899	1159
ENSMUSG00000013668	0	0	0	0	0	0	0	0	0	0	0	0	0
ENSMUSG00000013698	307	265	294	223	176	192	250	356	554	148	284	164	187
ENSMUSG00000013701	71	55	28	136	117	162	0	0	0	43	69	84	120
ENSMUSG00000013707	12	9	12	9	4	9	11	21	20	13	6	10	21
ENSMUSG00000013736	185	141	183	98	98	95	73	93	133	38	54	48	80
ENSMUSG00000013766	2	0	0	0	2	0	0	0	2	0	0	0	0
ENSMUSG00000013787	775	741	574	1120	523	647	802	720	1231	634	1249	671	744
ENSMUSG00000013822	370	364	349	239	158	161	284	548	547	496	796	442	517
ENSMUSG00000013833	244	202	188	454	208	204	432	291	406	782	1384	786	898
ENSMUSG00000013846	1667	1441	1674	1067	1035	1310	1330	1953	3162	587	1081	585	1087
ENSMUSG00000013858	1240	1075	920	1384	608	820	1506	853	994	978	1910	907	982
ENSMUSG00000013878	214	146	217	62	52	74	77	42	159	19	34	39	53
ENSMUSG00000013921	7	12	5	15	4	7	4	10	6	10	19	3	6
ENSMUSG00000013928	0	0	0	0	0	0	0	0	1	1	0	0	1
ENSMUSG00000013936	0	0	0	0	0	0	0	0	0	0	0	1	0
ENSMUSG00000013973	466	474	459	357	259	353	311	337	646	169	325	224	275
ENSMUSG00000013974	1	2	2	0	0	1	0	0	0	3	1	0	1
ENSMUSG00000013997	743	645	756	404	274	388	379	787	656	264	722	342	432
ENSMUSG00000014030	2	4	1	0	0	2	0	0	0	1	1	0	0
ENSMUSG00000014039	91	50	70	51	88	95	25	64	67	26	55	27	57
ENSMUSG00000014074	198	154	198	122	142	157	87	115	231	67	118	108	107
ENSMUSG00000014075	11	4	11	4	7	8	6	28	24	41	56	37	34
ENSMUSG00000014077	4452	3362	3686	1723	1446	1690	1176	1408	2380	869	1342	1200	1608
ENSMUSG00000014104	0	0	0	0	0	0	0	0	0	0	0	0	0
ENSMUSG00000014158	4	2	7	7	6	7	52	40	73	3	8	5	5
ENSMUSG00000014164	66	19	26	48	52	46	10	27	27	12	40	26	56
ENSMUSG00000014177	25	7	11	34	27	47	20	34	65	6	23	25	43
ENSMUSG00000014195	560	482	481	287	257	370	239	249	587	153	263	196	219
ENSMUSG00000014198	0	0	0	0	0	0	0	0	0	0	0	0	0
ENSMUSG00000014226	398	334	413	106	230	245	219	244	360	116	228	143	193
ENSMUSG00000014232	61	59	91	39	23	55	339	323	828	19	35	30	30
ENSMUSG00000014243	116	109	100	70	49	74	116	108	224	15	17	26	25
ENSMUSG00000014245	69	84	60	66	48	75	25	38	55	438	622	190	235
ENSMUSG00000014294	1135	1507	839	504	339	383	448	1447	973	1056	1450	890	1154
ENSMUSG00000014301	7	21	8	5	3	3	0	12	3	24	27	14	23
ENSMUSG00000014303	21	40	28	28	18	23	32	23	52	30	74	18	27
ENSMUSG00000014313	287	516	258	49	85	83	17	51	51	7	3	3	2
ENSMUSG00000014329	47	47	29	168	167	208	20	40	31	50	50	27	43
ENSMUSG00000014349	710	647	757	607	460	551	676	687	1202	560	1030	591	739
ENSMUSG00000014351	0	0	0	0	0	0	4	4	10	0	0	0	0
ENSMUSG00000014353	315	216	299	345	257	334	122	107	197	90	204	123	220
ENSMUSG00000014355	432	352	401	312	404	433	306	378	594	104	246	188	248
ENSMUSG00000014361	204	130	160	242	236	316	40	61	140	226	488	340	313
ENSMUSG00000014402	283	251	254	224	190	214	254	319	492	376	702	287	391
ENSMUSG00000014418	213	161	207	174	177	204	137	191	350	74	189	140	207
ENSMUSG00000014426	93	103	77	79	66	76	53	57	82	75	93	67	77
ENSMUSG00000014444	54	20	35	81	82	70	18	68	66	43	79	59	43
ENSMUSG00000014453	8	4	2	6	5	8	0	0	4	1	2	0	2
ENSMUSG00000014470	134	139	129	102	47	50	79	76	83	147	271	150	189
ENSMUSG00000014496	304	176	261	263	396	384	102	199	285	72	106	119	197
ENSMUSG00000014498	22	28	32	53	39	58	4	34	16	15	24	20	14
ENSMUSG00000014503	6	5	11	3	12	8	9	1	9	0	1	5	1
ENSMUSG00000014504	131	114	138	134	93	138	63	81	216	96	130	107	180
ENSMUSG00000014529	0	0	0	0	0	0	0	0	0	0	0	0	0
ENSMUSG00000014542	816	359	635	481	378	325	337	550	1151	495	501	606	754
ENSMUSG00000014543	0	0	0	0	0	0	0	3	5	1	0	0	0
ENSMUSG00000014547	28	11	16	19	71	64	0	25	17	9	13	23	46
ENSMUSG00000014550	141	103	139	106	110	129	92	98	213	57	114	89	149
ENSMUSG00000014551	189	172	168	102	78	92	99	198	310	73	150	101	140
ENSMUSG00000014554	134	154	122	82	62	99	135	158	285	101	240	106	136
ENSMUSG00000014592	11	8	10	6	6	4	25	19	20	8	11	8	5
ENSMUSG00000014599	124	104	144	127	79	66	132	97	109	96	169	95	106
ENSMUSG00000014601	236	188	194	216	207	234	223	227	382	134	186	126	185
ENSMUSG00000014602	1	4	1	6	3	3	28	21	66	0	1	1	1
ENSMUSG00000014603	0	0	0	0	0	0	2	0	0	0	0	0	0
ENSMUSG00000014606	927	838	883	1158	571	812	701	598	1118	798	1355	798	929
ENSMUSG00000014609	5	11	3	1	2	2	0	0	3	71	162	82	89
ENSMUSG00000014633	86	121	111	80	62	69	84	170	209	63	122	73	83
ENSMUSG00000014668	216	221	234	190	151	192	159	143	262	84	157	125	159
ENSMUSG00000014686	0	0	0	2	0	0	0	1	1	1	1	1	3
ENSMUSG00000014704	3	1	4	6	2	1	0	3	4	4	10	1	3
ENSMUSG00000014725	0	0	0	0	0	0	0	0	0	2	0	0	0
ENSMUSG00000014747	0	2	0	2	0	0	0	0	0	0	0	0	0
ENSMUSG00000014748	1090	998	1127	863	538	612	1293	1301	2301	649	1077	740	871
ENSMUSG00000014763	295	216	318	172	169	160	200	239	391	147	346	199	209
ENSMUSG00000014767	229	164	191	194	178	205	132	139	224	119	111	81	143
ENSMUSG00000014769	1075	1288	1050	646	522	563	479	809	1027	822	1442	959	1110
ENSMUSG00000014771	0	0	0	0	0	0	0	0	0	0	0	0	0
ENSMUSG00000014773	45	29	42	49	30	40	48	38	46	30	58	26	40
ENSMUSG00000014776	7	11	1	2	1	1	23	18	17	2	7	2	0
ENSMUSG00000014778	117	87	110	87	57	70	55	50	51	32	33	18	23
ENSMUSG00000014782	0	0	1	2	0	1	0	0	0	0	0	0	0
ENSMUSG00000014786	1	2	7	2	6	2	1	6	8	0	0	2	2
ENSMUSG00000014791	334	294	311	261	158	207	278	298	425	204	419	240	234
ENSMUSG00000014813	0	0	1	0	1	1	0	4	0	1	4	0	4
ENSMUSG00000014837	9	9	8	6	5	7	5	14	9	6	5	7	14
ENSMUSG00000014846	1	2	1	7	5	9	0	9	5	1	28	2	6
ENSMUSG00000014850	147	139	187	90	109	117	61	75	165	44	69	68	80
ENSMUSG00000014852	54	31	36	359	156	271	86	130	149	74	117	75	88
ENSMUSG00000014856	137	134	139	104	87	97	75	162	143	89	176	131	202
ENSMUSG00000014859	269	271	273	342	179	198	246	249	371	304	437	201	231
ENSMUSG00000014867	4520	3935	4582	4050	3010	3527	4422	4546	9075	2980	6019	3946	4695
ENSMUSG00000014873	115	103	125	107	62	88	83	139	242	47	86	51	70
ENSMUSG00000014905	618	545	632	388	350	410	545	511	1151	159	188	251	302
ENSMUSG00000014907	68	54	52	26	21	27	26	22	38	76	97	44	46
ENSMUSG00000014932	346	239	300	130	211	215	162	166	269	47	73	81	119
ENSMUSG00000014956	661	328	568	301	398	449	367	388	606	242	386	249	355
ENSMUSG00000014959	481	308	467	502	327	345	435	381	743	593	1079	354	430
ENSMUSG00000014980	59	52	55	118	85	128	29	47	67	18	45	28	59
ENSMUSG00000015001	0	0	0	0	0	1	0	1	0	0	0	0	0
ENSMUSG00000015002	721	501	624	398	448	519	247	363	663	168	300	290	405
ENSMUSG00000015013	101	135	84	136	83	89	86	97	234	86	136	78	95
ENSMUSG00000015016	422	375	346	403	236	236	395	398	591	233	423	280	351
ENSMUSG00000015023	278	201	293	187	136	158	102	187	276	149	184	120	164
ENSMUSG00000015027	91	90	73	103	56	68	177	128	222	26	46	33	44
ENSMUSG00000015053	13	10	17	14	6	6	27	17	19	4	21	6	9
ENSMUSG00000015083	3070	3466	3128	2336	1673	1895	1512	1398	2979	1104	1649	1403	1605
ENSMUSG00000015085	47	56	60	35	15	24	57	43	60	97	171	96	121
ENSMUSG00000015087	233	211	213	310	154	224	210	182	341	199	274	184	138
ENSMUSG00000015090	21	55	33	53	31	38	9	4	16	0	0	2	1
ENSMUSG00000015092	633	736	465	538	303	295	611	477	498	413	520	300	350
ENSMUSG00000015093	16	17	35	2	11	9	60	133	187	9	32	25	21
ENSMUSG00000015094	20	10	19	11	5	4	113	42	67	18	23	21	34
ENSMUSG00000015095	535	484	581	841	409	535	883	849	1293	992	1542	609	795
ENSMUSG00000015112	2909	1990	2645	2720	1973	2594	2125	1542	2963	1175	2343	1961	2184
ENSMUSG00000015120	57	37	56	34	35	36	59	66	139	15	28	12	34
ENSMUSG00000015126	96	95	86	93	47	47	138	113	171	61	135	81	89
ENSMUSG00000015127	33	34	50	52	53	59	10	61	36	116	155	83	71
ENSMUSG00000015133	288	178	242	325	274	367	257	250	335	147	263	184	235
ENSMUSG00000015134	1	12	2	4	4	0	22	26	8	16	23	15	11
ENSMUSG00000015143	245	259	298	437	266	301	115	150	185	311	574	338	339
ENSMUSG00000015149	484	487	393	307	179	242	253	266	350	383	691	285	315
ENSMUSG00000015165	1417	1215	931	1008	597	733	858	639	1334	473	727	508	573
ENSMUSG00000015176	302	308	345	348	271	335	259	295	630	169	194	127	157
ENSMUSG00000015189	437	272	386	302	312	355	170	115	319	70	111	93	136
ENSMUSG00000015202	106	98	146	80	65	74	80	102	205	76	96	50	97
ENSMUSG00000015214	490	285	396	364	342	406	243	297	460	81	134	159	169
ENSMUSG00000015217	55	50	48	70	33	29	28	44	66	17	46	38	36
ENSMUSG00000015222	11	13	15	10	24	32	6	2	14	4	1	3	2
ENSMUSG00000015224	182	122	142	98	100	84	20	28	69	1	3	1	2
ENSMUSG00000015242	0	0	0	0	0	0	0	0	0	0	0	0	0
ENSMUSG00000015243	2359	1510	1945	1744	2373	2633	940	1119	2177	574	1011	1207	1408
ENSMUSG00000015247	1131	910	1114	587	560	664	473	391	653	178	478	330	346
ENSMUSG00000015289	170	249	153	129	84	83	70	213	109	54	114	75	72
ENSMUSG00000015290	172	179	181	187	136	178	233	203	349	111	172	160	179
ENSMUSG00000015291	1007	996	1092	930	710	975	760	763	1603	574	1048	633	727
ENSMUSG00000015305	637	353	407	350	352	420	316	475	698	251	459	336	381
ENSMUSG00000015312	5	4	7	1	1	3	7	8	8	2	8	4	4
ENSMUSG00000015314	2	0	2	4	1	3	7	0	6	0	3	0	2
ENSMUSG00000015316	2	0	0	0	0	0	0	1	0	2	0	1	1
ENSMUSG00000015335	207	178	191	162	72	103	140	173	165	241	617	260	217
ENSMUSG00000015337	215	133	109	181	68	63	301	171	184	65	106	90	89
ENSMUSG00000015340	107	41	98	78	50	63	32	84	144	26	44	55	65
ENSMUSG00000015341	735	546	823	614	418	607	258	187	388	239	477	272	390
ENSMUSG00000015342	98	62	95	49	84	78	45	77	151	34	42	53	68
ENSMUSG00000015354	11	7	13	6	5	4	0	3	6	5	4	2	5
ENSMUSG00000015355	18	7	7	3	5	2	3	7	22	3	13	6	10
ENSMUSG00000015357	2297	1855	2071	780	1918	2693	1716	3308	3204	472	839	591	2617
ENSMUSG00000015363	1238	1174	824	1023	618	680	1235	1194	1867	348	782	540	580
ENSMUSG00000015365	0	0	0	0	0	0	0	0	0	3	2	3	3
ENSMUSG00000015377	85	93	84	97	52	68	113	130	171	46	86	65	43
ENSMUSG00000015396	12	10	5	10	0	3	7	10	4	3	3	2	5
ENSMUSG00000015401	1	0	1	1	0	0	0	4	2	0	0	0	1
ENSMUSG00000015405	5	0	1	5	5	8	0	1	0	18	25	12	13
ENSMUSG00000015437	3	4	2	2	3	1	0	0	6	0	0	3	1
ENSMUSG00000015441	0	0	0	0	0	0	0	0	1	0	0	0	1
ENSMUSG00000015443	0	0	0	0	0	0	0	0	0	0	0	0	0
ENSMUSG00000015452	3	3	2	4	4	3	0	3	1	3	19	3	3
ENSMUSG00000015461	253	246	158	212	166	184	205	215	296	244	375	207	368
ENSMUSG00000015467	14	13	6	6	10	11	3	11	3	1	7	3	5
ENSMUSG00000015468	47	37	25	59	44	79	24	40	57	37	76	61	52
ENSMUSG00000015474	272	229	269	268	139	220	125	148	211	121	242	107	172
ENSMUSG00000015476	5	5	11	5	3	5	3	3	3	8	14	3	5
ENSMUSG00000015478	1099	1281	1093	544	357	341	345	1087	606	815	2122	920	992
ENSMUSG00000015484	0	0	0	0	0	0	0	0	0	0	0	0	0
ENSMUSG00000015488	224	331	266	480	314	435	263	283	674	75	129	92	133
ENSMUSG00000015501	101	56	72	88	107	119	38	52	92	66	134	121	113
ENSMUSG00000015519	1	0	0	0	0	0	0	0	0	0	0	0	5
ENSMUSG00000015522	634	458	464	440	410	456	157	292	413	150	261	165	224
ENSMUSG00000015533	0	0	0	0	4	2	3	15	5	19	30	9	10
ENSMUSG00000015536	1206	1064	1197	930	840	1167	653	681	1648	392	562	615	975
ENSMUSG00000015542	185	180	152	91	66	91	193	141	259	127	172	129	154
ENSMUSG00000015568	21	12	18	19	10	11	3	59	27	0	1	1	9
ENSMUSG00000015575	337	349	322	318	260	298	148	252	456	381	536	390	553
ENSMUSG00000015579	0	0	0	0	0	0	0	0	0	0	0	0	0
ENSMUSG00000015597	103	52	78	57	133	165	20	42	57	22	25	42	63
ENSMUSG00000015599	16	20	19	18	10	14	505	514	591	5	4	1	2
ENSMUSG00000015605	251	207	178	203	98	153	230	218	212	132	228	119	129
ENSMUSG00000015619	1	0	3	0	3	0	0	1	2	3	1	2	2
ENSMUSG00000015627	3	1	0	5	2	0	2	1	0	0	0	1	0
ENSMUSG00000015647	59	41	39	55	38	46	16	53	49	9	23	9	11
ENSMUSG00000015652	2	3	2	0	0	0	0	1	0	0	0	0	0
ENSMUSG00000015653	26	18	18	1	1	2	0	1	2	8	13	11	7
ENSMUSG00000015656	1676	1511	1519	980	1512	2453	155	260	294	540	741	940	640
ENSMUSG00000015659	34	31	37	63	76	92	29	38	63	18	61	56	51
ENSMUSG00000015665	0	0	0	0	2	0	0	4	3	0	1	0	1
ENSMUSG00000015668	166	152	200	142	116	158	125	170	316	465	806	257	430
ENSMUSG00000015671	308	321	291	186	185	179	188	201	448	370	689	428	714
ENSMUSG00000015672	247	218	228	97	85	120	64	123	162	110	206	175	192
ENSMUSG00000015697	307	294	405	290	252	282	101	187	292	197	409	252	302
ENSMUSG00000015702	24	21	34	34	30	45	22	13	47	24	37	13	18
ENSMUSG00000015709	1	0	0	0	0	0	6	1	2	13	30	7	25
ENSMUSG00000015711	300	248	290	152	120	115	257	284	556	137	333	161	246
ENSMUSG00000015714	5378	4694	5861	3547	2674	2796	3174	2992	7898	4283	7530	5258	7087
ENSMUSG00000015721	0	0	0	0	0	0	0	0	0	0	0	0	0
ENSMUSG00000015733	1133	896	1153	487	533	569	364	638	1066	270	503	492	619
ENSMUSG00000015745	59	47	59	57	20	24	24	25	15	27	71	20	35
ENSMUSG00000015747	148	88	111	60	68	74	99	95	173	93	145	93	107
ENSMUSG00000015748	72	124	105	68	77	100	66	67	153	52	112	63	57
ENSMUSG00000015749	320	282	274	230	283	372	144	225	387	122	248	204	287
ENSMUSG00000015750	141	150	102	161	115	99	135	135	236	379	643	486	480
ENSMUSG00000015755	1098	722	839	501	650	737	292	629	888	462	600	315	723
ENSMUSG00000015757	189	133	189	185	173	259	72	93	215	89	114	98	160
ENSMUSG00000015759	925	867	1090	469	433	474	426	552	984	310	544	472	574
ENSMUSG00000015766	28	16	31	25	25	15	24	64	53	13	18	22	21
ENSMUSG00000015776	356	317	361	378	267	360	296	326	656	291	561	371	402
ENSMUSG00000015787	0	0	0	0	0	0	0	0	0	0	0	0	0
ENSMUSG00000015790	302	268	333	253	157	208	183	174	353	294	415	292	342
ENSMUSG00000015804	210	219	252	134	114	117	121	191	235	190	223	212	245
ENSMUSG00000015806	6122	6108	6341	2685	2266	2477	2139	2375	4508	3399	5751	4765	6274
ENSMUSG00000015812	8	8	8	3	9	9	0	0	0	5	5	0	6
ENSMUSG00000015829	0	0	0	0	1	0	21	6	77	1	1	2	1
ENSMUSG00000015837	6296	5230	5650	3310	2729	3315	6032	6866	8655	4354	8364	4402	6430
ENSMUSG00000015839	1399	864	1488	693	667	763	1207	908	1720	615	1265	703	1026
ENSMUSG00000015843	63	59	59	55	38	45	120	101	178	64	136	79	115
ENSMUSG00000015846	5189	4249	4364	8801	4572	5827	4233	4104	7279	5246	8441	5651	4638
ENSMUSG00000015850	68	60	30	53	26	33	204	105	154	318	583	178	157
ENSMUSG00000015852	3	3	1	0	0	1	0	3	1	1	2	3	2
ENSMUSG00000015854	740	296	453	445	296	206	420	760	1617	583	509	616	954
ENSMUSG00000015869	1201	1045	1142	1371	774	1009	1086	798	1733	210	512	413	569
ENSMUSG00000015879	6	4	18	12	19	19	2	2	3	11	30	34	28
ENSMUSG00000015880	1	0	2	1	2	6	2	3	13	9	13	4	17
ENSMUSG00000015882	96	47	77	38	56	63	39	39	105	7	12	14	16
ENSMUSG00000015889	331	282	303	302	230	311	159	203	341	181	338	188	301
ENSMUSG00000015890	3056	2953	3398	2109	1726	1987	623	636	1239	1058	2250	1403	1853
ENSMUSG00000015932	2479	1739	2499	956	914	1078	863	1388	2020	715	1213	899	1427
ENSMUSG00000015937	973	939	802	598	360	420	782	608	951	295	403	385	418
ENSMUSG00000015942	18	6	11	9	9	13	10	28	18	1	4	0	8
ENSMUSG00000015943	121	157	120	104	33	45	167	210	148	127	177	140	136
ENSMUSG00000015944	93	72	86	29	41	54	42	68	138	45	74	29	62
ENSMUSG00000015947	19	8	27	6	9	4	17	14	31	2	0	1	2
ENSMUSG00000015950	13	2	5	2	1	3	9	5	5	5	5	8	9
ENSMUSG00000015957	0	0	0	0	0	0	0	0	0	0	0	0	0
ENSMUSG00000015961	605	566	620	283	341	341	356	296	599	315	523	479	622
ENSMUSG00000015962	0	0	0	0	0	1	0	0	4	0	2	0	3
ENSMUSG00000015966	114	90	103	86	61	82	196	146	209	95	166	81	185
ENSMUSG00000015968	54	47	61	22	36	47	17	9	13	22	41	38	38
ENSMUSG00000015970	2605	1848	2413	1640	1676	1772	1244	1286	1800	2254	4087	2436	3226
ENSMUSG00000015971	340	252	304	257	168	232	191	310	449	149	278	232	298
ENSMUSG00000015980	6	1	2	0	0	0	0	4	1	10	9	9	10
ENSMUSG00000015981	3	3	4	4	2	1	0	1	1	1	0	0	1
ENSMUSG00000015994	386	370	366	289	265	270	287	302	685	196	351	245	351
ENSMUSG00000016018	216	158	243	161	173	238	58	121	238	146	218	197	297
ENSMUSG00000016024	512	457	671	813	551	724	1439	1266	1679	1108	1986	932	1189
ENSMUSG00000016028	340	212	401	11	78	19	275	472	776	6	10	0	8
ENSMUSG00000016087	44	28	44	31	29	32	2	38	36	23	27	27	33
ENSMUSG00000016128	7	2	9	6	8	10	3	9	4	2	1	1	11
ENSMUSG00000016150	0	0	0	0	0	0	0	0	0	0	0	0	0
ENSMUSG00000016179	0	0	0	0	0	0	0	0	1	0	0	0	0
ENSMUSG00000016181	139	108	117	127	107	142	59	88	134	91	143	110	136
ENSMUSG00000016194	6105	4748	6913	8830	7149	8530	6265	8306	14059	5757	10663	8204	10629
ENSMUSG00000016200	0	0	0	0	0	0	0	0	1	5	21	25	26
ENSMUSG00000016206	30	22	34	11	11	7	36	49	66	16	46	47	48
ENSMUSG00000016239	11	5	3	1	16	18	3	9	9	2	3	2	7
ENSMUSG00000016252	1272	1694	1099	724	493	619	832	1258	1516	1330	1756	1188	1632
ENSMUSG00000016253	472	305	384	439	286	339	399	423	704	242	455	326	415
ENSMUSG00000016255	0	1	2	0	1	2	5	3	2	0	0	1	0
ENSMUSG00000016256	2140	1952	1900	2205	1288	1760	2702	3341	5463	2051	4704	3485	4315
ENSMUSG00000016257	350	300	376	165	194	201	181	278	426	140	254	204	319
ENSMUSG00000016262	5	5	2	73	18	34	136	144	233	0	3	0	8
ENSMUSG00000016283	1	2	0	1	1	0	42	29	81	0	0	0	0
ENSMUSG00000016308	241	268	224	104	118	129	151	179	243	219	220	181	227
ENSMUSG00000016319	3717	3030	3841	2546	1933	2157	2205	2010	4013	450	771	822	1088
ENSMUSG00000016327	0	0	2	1	2	0	0	1	1	0	0	0	0
ENSMUSG00000016344	396	526	374	241	129	174	293	366	437	2274	2505	1124	1430
ENSMUSG00000016346	0	0	0	0	0	0	0	0	0	0	0	0	0
ENSMUSG00000016349	0	0	0	0	0	0	0	0	0	0	5	1	0
ENSMUSG00000016356	13	20	14	7	11	8	0	1	1	0	3	0	2
ENSMUSG00000016382	1256	839	1428	848	950	986	658	698	1461	471	743	717	927
ENSMUSG00000016386	0	3	1	39	26	32	15	12	27	2	7	5	15
ENSMUSG00000016409	114	93	159	74	73	83	47	84	167	49	66	69	90
ENSMUSG00000016427	1105	1900	1369	498	369	489	513	1720	1222	1690	3574	1930	3046
ENSMUSG00000016458	3	13	7	11	2	4	7	7	1	3	11	2	3
ENSMUSG00000016477	168	126	123	99	112	130	47	86	81	62	63	62	91
ENSMUSG00000016481	319	276	346	146	133	139	99	187	240	168	289	217	265
ENSMUSG00000016487	516	270	447	197	266	246	269	294	452	92	162	147	345
ENSMUSG00000016493	11	3	3	0	7	1	3	2	4	1	2	0	0
ENSMUSG00000016494	15	16	24	24	16	15	21	7	8	0	45	8	19
ENSMUSG00000016495	53	56	60	33	22	24	25	16	26	21	16	14	37
ENSMUSG00000016496	37	17	26	11	10	7	6	8	20	14	9	14	21
ENSMUSG00000016498	0	0	0	0	0	0	0	0	0	1	0	0	0
ENSMUSG00000016503	17	33	35	48	32	35	217	77	218	109	108	115	137
ENSMUSG00000016510	234	200	257	198	160	189	158	210	328	125	241	136	197
ENSMUSG00000016520	346	232	332	124	173	178	172	225	215	154	216	191	639
ENSMUSG00000016524	0	0	0	0	0	0	0	1	2	0	0	0	0
ENSMUSG00000016526	18	8	23	8	15	6	42	9	15	25	28	26	17
ENSMUSG00000016528	1096	918	906	586	420	512	1060	986	1903	431	707	560	874
ENSMUSG00000016529	2	0	0	0	0	0	0	0	0	0	0	0	1
ENSMUSG00000016534	4092	2450	4077	3234	3271	3704	2356	2952	4516	2666	4141	2087	3088
ENSMUSG00000016541	936	800	999	610	526	608	493	444	917	672	1267	754	1046
ENSMUSG00000016552	1	3	2	9	4	4	6	0	3	6	3	0	0
ENSMUSG00000016554	560	555	558	745	388	439	416	413	878	418	825	535	699
ENSMUSG00000016559	1427	1795	1655	1163	1017	1192	981	1286	2190	412	799	475	903
ENSMUSG00000016619	504	379	578	597	387	432	349	444	726	385	622	381	347
ENSMUSG00000016624	5	1	4	4	5	5	0	2	5	96	126	64	88
ENSMUSG00000016626	0	0	0	0	0	0	0	0	0	0	0	0	0
ENSMUSG00000016637	108	115	144	67	34	28	42	115	81	567	1150	414	559
ENSMUSG00000016664	762	527	853	492	411	438	644	1016	1241	328	683	455	497
ENSMUSG00000016756	2533	1853	2252	1426	2649	3143	0	2	7	42	96	68	102
ENSMUSG00000016757	178	163	171	143	95	122	137	130	284	172	269	155	202
ENSMUSG00000016758	42	50	50	27	23	29	3	6	5	17	31	23	23
ENSMUSG00000016763	7	0	2	16	4	8	25	28	47	22	36	14	12
ENSMUSG00000016831	438	371	471	308	247	263	194	206	416	207	291	183	271
ENSMUSG00000016833	134	168	137	26	33	18	33	64	39	35	80	58	68
ENSMUSG00000016918	8	7	8	48	31	19	47	17	7	9	28	6	8
ENSMUSG00000016921	1520	1169	1340	1012	964	1258	639	669	1242	435	714	605	735
ENSMUSG00000016933	331	179	240	283	315	314	175	271	341	233	387	312	344
ENSMUSG00000016940	309	248	282	226	153	219	619	451	841	170	366	313	321
ENSMUSG00000016942	7268	5008	5310	8786	4994	6166	7389	7023	9318	3830	8003	4914	6007
ENSMUSG00000016946	51	44	60	55	40	50	54	49	96	24	29	26	36
ENSMUSG00000016982	0	0	0	0	0	0	0	0	0	0	0	0	0
ENSMUSG00000016984	92	61	92	31	67	71	39	39	88	17	49	36	57
ENSMUSG00000016995	0	0	0	3	0	1	0	0	0	0	1	1	1
ENSMUSG00000016998	0	0	0	0	0	0	0	0	0	0	0	0	0
ENSMUSG00000017000	0	0	0	0	0	0	0	0	0	0	0	0	0
ENSMUSG00000017002	2	25	9	2	0	0	3	5	5	0	46	5	4
ENSMUSG00000017003	0	0	0	0	0	0	0	0	0	0	0	0	0
ENSMUSG00000017004	0	0	0	0	0	0	0	0	0	0	0	0	0
ENSMUSG00000017007	0	0	0	0	0	1	0	1	2	0	0	0	0
ENSMUSG00000017009	6680	5883	4826	8060	4201	5988	4881	3656	8779	2052	4322	3282	3194
ENSMUSG00000017049	0	0	0	0	1	0	0	0	0	0	0	0	0
ENSMUSG00000017057	467	476	470	349	293	315	463	412	845	266	506	424	558
ENSMUSG00000017064	0	0	0	0	0	0	0	0	0	0	0	0	0
ENSMUSG00000017119	2464	1791	2273	2182	1921	2339	1042	1341	2366	1121	2037	1525	1772
ENSMUSG00000017132	130	81	117	167	87	123	79	69	139	43	56	32	52
ENSMUSG00000017144	300	175	239	177	191	153	195	152	440	134	266	150	182
ENSMUSG00000017146	10	7	13	11	10	11	0	3	4	5	5	4	7
ENSMUSG00000017165	0	0	0	0	0	0	0	0	0	0	0	0	0
ENSMUSG00000017167	31	31	30	51	37	28	1237	1065	1125	1	7	2	3
ENSMUSG00000017176	5	11	5	35	13	16	18	21	25	4	5	4	12
ENSMUSG00000017188	708	900	715	387	247	274	245	319	438	196	366	288	302
ENSMUSG00000017195	0	3	2	2	2	4	4	0	0	4	5	9	10
ENSMUSG00000017204	0	0	0	8	5	8	0	0	0	0	0	0	0
ENSMUSG00000017210	283	200	195	210	177	205	151	223	362	247	496	219	337
ENSMUSG00000017211	0	0	0	0	1	1	0	0	0	0	0	0	1
ENSMUSG00000017221	1304	1034	1069	1202	648	775	1180	1086	1657	1046	2063	1234	1543
ENSMUSG00000017264	191	165	184	223	170	203	155	173	331	194	309	172	251
ENSMUSG00000017286	282	207	277	193	180	241	134	205	397	107	204	184	243
ENSMUSG00000017288	331	314	312	292	239	261	261	267	495	129	194	138	164
ENSMUSG00000017291	733	447	648	442	722	758	232	362	549	201	402	443	489
ENSMUSG00000017299	80	113	77	91	70	69	53	55	91	54	107	60	46
ENSMUSG00000017300	0	0	0	0	0	0	0	0	0	0	0	0	0
ENSMUSG00000017307	174	118	117	168	80	122	125	173	216	46	107	111	138
ENSMUSG00000017309	240	252	228	198	112	90	156	133	344	149	258	131	162
ENSMUSG00000017310	0	0	0	0	0	0	0	0	0	0	0	0	0
ENSMUSG00000017311	0	0	0	0	0	0	0	0	0	0	0	0	0
ENSMUSG00000017314	2	3	5	5	5	1	12	10	15	6	9	2	6
ENSMUSG00000017316	0	0	0	0	0	0	0	0	0	0	0	0	0
ENSMUSG00000017344	30518	29381	29603	24262	14873	17837	21836	20395	30661	12625	21844	16399	16814
ENSMUSG00000017376	159	120	150	64	94	95	84	113	171	96	120	86	138
ENSMUSG00000017386	628	441	434	446	255	303	900	596	864	380	688	319	299
ENSMUSG00000017390	230	270	238	291	157	177	94	266	269	24	62	17	18
ENSMUSG00000017400	3	0	2	22	7	6	0	0	0	3	1	1	1
ENSMUSG00000017404	29	41	29	5	5	4	4	9	28	761	1037	506	742
ENSMUSG00000017405	97	81	63	50	31	24	72	88	150	75	127	62	53
ENSMUSG00000017412	42	44	45	12	22	12	8	6	10	7	4	8	2
ENSMUSG00000017417	7	15	9	14	18	7	0	2	7	0	2	0	3
ENSMUSG00000017418	69	34	54	26	102	78	13	24	25	22	36	53	73
ENSMUSG00000017421	718	586	812	632	623	640	419	500	1043	389	642	510	630
ENSMUSG00000017428	1500	1415	1404	652	663	615	993	1070	1671	911	1217	514	1037
ENSMUSG00000017446	138	91	105	158	109	99	120	156	239	152	243	151	179
ENSMUSG00000017453	3901	3900	4422	2286	1648	2296	2200	2180	4503	2550	4603	2663	3108
ENSMUSG00000017466	171	164	152	283	146	106	146	278	308	1138	1668	1048	1561
ENSMUSG00000017478	388	374	357	320	196	244	370	437	592	178	365	179	227
ENSMUSG00000017485	501	328	505	204	290	292	181	235	403	125	238	197	280
ENSMUSG00000017491	49	40	41	90	66	71	37	36	82	50	109	75	105
ENSMUSG00000017493	16328	16909	15461	23526	10834	14355	11305	9225	21486	13846	31022	20343	19763
ENSMUSG00000017499	1	0	4	0	2	4	0	2	2	0	0	0	0
ENSMUSG00000017548	395	276	371	202	195	254	180	220	390	54	86	90	114
ENSMUSG00000017550	29	21	23	11	25	18	8	11	8	3	9	4	3
ENSMUSG00000017561	102	61	75	65	52	74	73	43	100	31	41	21	38
ENSMUSG00000017588	0	0	0	1	0	0	0	0	0	0	0	0	0
ENSMUSG00000017607	9	9	8	8	9	1	5	6	5	0	0	1	1
ENSMUSG00000017615	556	468	548	474	336	437	430	465	868	423	665	333	517
ENSMUSG00000017631	48	21	29	39	38	30	28	48	38	45	36	29	47
ENSMUSG00000017639	73	93	78	123	199	300	73	97	213	126	193	127	208
ENSMUSG00000017652	3	4	4	2	2	0	12	23	17	0	6	0	5
ENSMUSG00000017664	356	358	300	500	250	334	1089	1170	1814	920	2321	1228	1387
ENSMUSG00000017667	22	14	18	29	26	24	7	20	28	4	6	8	10
ENSMUSG00000017670	120	130	125	124	112	113	1454	1594	2105	62	95	64	78
ENSMUSG00000017677	477	268	175	95	169	184	67	43	105	123	127	73	150
ENSMUSG00000017679	209	146	214	153	190	270	188	142	373	71	92	95	147
ENSMUSG00000017686	496	329	487	348	347	409	237	289	575	97	256	164	293
ENSMUSG00000017688	2	3	2	0	1	1	0	0	1	25	34	31	37
ENSMUSG00000017692	3	1	0	2	0	1	0	1	4	0	1	3	0
ENSMUSG00000017697	16	17	20	8	8	12	10	21	32	16	29	20	9
ENSMUSG00000017707	3092	2291	2761	3468	2660	3918	1713	1567	2886	1624	2692	1437	2177
ENSMUSG00000017713	62	73	84	78	28	40	101	113	150	19	27	15	29
ENSMUSG00000017715	132	128	121	116	103	107	73	99	163	61	93	72	99
ENSMUSG00000017716	11	15	8	11	7	2	11	24	55	14	21	18	17
ENSMUSG00000017718	1623	1914	1499	511	303	345	3170	4116	7194	1562	3000	1591	1948
ENSMUSG00000017720	1	0	0	1	4	5	0	2	2	3	2	0	4
ENSMUSG00000017721	733	762	604	684	363	388	641	584	822	511	785	380	501
ENSMUSG00000017723	49	34	52	24	10	10	10	4	2	307	605	147	255
ENSMUSG00000017724	0	0	1	4	2	1	11	3	2	1	0	2	0
ENSMUSG00000017733	0	0	0	0	0	0	0	0	0	0	0	0	0
ENSMUSG00000017734	69	80	67	75	38	58	109	104	122	41	122	65	78
ENSMUSG00000017737	0	0	2	0	1	0	0	0	0	0	0	0	0
ENSMUSG00000017740	36	23	25	33	26	39	25	20	41	4	2	1	1
ENSMUSG00000017747	225	179	202	147	91	105	134	130	226	214	361	216	288
ENSMUSG00000017754	1450	974	771	96	138	60	487	517	794	36	36	38	40
ENSMUSG00000017756	1603	1171	1474	1044	792	809	647	662	1412	485	1088	619	780
ENSMUSG00000017760	1707	1913	2007	2088	963	1368	974	1333	1560	3597	6435	2457	2866
ENSMUSG00000017764	36	54	57	62	29	31	33	66	76	44	46	15	17
ENSMUSG00000017765	259	155	208	177	102	138	261	168	284	172	373	186	214
ENSMUSG00000017767	2	1	0	0	0	0	0	0	0	0	0	0	0
ENSMUSG00000017774	523	491	509	387	306	303	374	379	656	289	521	370	385
ENSMUSG00000017776	1008	622	1015	670	735	925	577	621	1252	207	382	275	339
ENSMUSG00000017778	275	207	191	438	198	237	454	1016	552	1412	1893	1535	1959
ENSMUSG00000017781	633	563	696	542	421	553	412	414	772	280	464	305	332
ENSMUSG00000017801	346	302	389	328	294	369	336	305	510	258	399	308	406
ENSMUSG00000017802	1901	1363	1253	1095	810	957	967	929	2199	631	1301	1026	1198
ENSMUSG00000017817	4	1	1	11	8	6	1	9	4	5	31	12	17
ENSMUSG00000017830	126	103	137	77	81	72	188	231	352	76	152	115	194
ENSMUSG00000017831	560	365	520	306	318	386	332	310	467	90	163	183	194
ENSMUSG00000017832	2	1	1	0	0	1	0	0	0	3	1	0	5
ENSMUSG00000017837	148	124	167	110	66	78	79	96	139	83	116	58	83
ENSMUSG00000017843	482	386	568	317	281	305	413	369	598	275	435	367	414
ENSMUSG00000017858	355	298	379	330	253	251	275	306	560	217	387	237	269
ENSMUSG00000017861	4	1	6	12	6	9	0	4	6	29	66	14	35
ENSMUSG00000017868	1121	1131	1166	643	685	644	313	370	747	614	1076	779	827
ENSMUSG00000017897	2	1	0	0	0	0	0	0	1	2	0	1	2
ENSMUSG00000017914	0	0	0	0	0	0	0	0	0	0	0	0	0
ENSMUSG00000017922	0	0	0	0	0	0	0	0	0	0	0	0	0
ENSMUSG00000017929	554	370	470	774	506	716	932	988	1655	201	461	329	248
ENSMUSG00000017943	0	0	0	0	0	0	0	2	0	0	0	0	0
ENSMUSG00000017950	204	101	156	360	293	362	178	240	389	108	114	133	114
ENSMUSG00000017969	18	22	16	9	2	5	20	0	1	6	31	4	18
ENSMUSG00000017978	191	153	193	162	182	194	96	103	274	58	112	68	118
ENSMUSG00000017999	278	189	208	196	124	186	109	211	227	104	205	117	135
ENSMUSG00000018001	90	67	74	62	67	63	38	68	121	17	38	33	46
ENSMUSG00000018008	67	30	41	55	41	27	39	68	90	29	38	25	43
ENSMUSG00000018012	10	6	12	11	12	24	1	7	12	12	15	3	11
ENSMUSG00000018040	142	141	122	138	63	108	62	102	151	60	126	106	83
ENSMUSG00000018042	12969	13362	13433	7799	4124	4750	6451	9291	13567	10819	24651	8767	9388
ENSMUSG00000018068	62	41	85	48	97	114	37	27	74	18	32	34	53
ENSMUSG00000018076	164	104	126	169	208	216	59	141	123	131	233	202	251
ENSMUSG00000018102	1165	1117	1187	550	563	634	714	879	1162	834	1479	879	1362
ENSMUSG00000018126	0	0	0	57	14	33	11	1	2	133	200	103	107
ENSMUSG00000018143	211	143	132	153	80	103	196	151	247	81	260	103	150
ENSMUSG00000018160	425	272	341	315	444	463	178	348	498	233	390	274	318
ENSMUSG00000018166	2742	1497	1986	1213	1215	1304	856	998	1699	1651	3208	2143	2062
ENSMUSG00000018167	192	167	166	163	97	145	140	181	287	105	178	115	109
ENSMUSG00000018168	10	3	5	2	6	4	0	6	0	6	4	9	10
ENSMUSG00000018169	7	16	15	26	12	15	36	20	23	14	31	12	15
ENSMUSG00000018171	1504	1067	1396	848	988	939	903	829	2174	256	396	298	466
ENSMUSG00000018189	200	177	212	97	111	131	72	107	164	37	72	55	99
ENSMUSG00000018196	259	253	303	244	233	292	83	55	169	64	76	46	67
ENSMUSG00000018199	68	52	62	24	33	35	43	46	98	14	12	29	29
ENSMUSG00000018209	260	211	292	173	214	279	131	185	305	155	191	135	188
ENSMUSG00000018211	2	5	2	0	0	2	0	0	0	0	0	0	0
ENSMUSG00000018217	36	24	31	40	22	21	48	35	70	32	74	25	55
ENSMUSG00000018238	1	2	6	2	0	1	0	1	1	0	0	0	1
ENSMUSG00000018239	56	42	41	21	33	30	19	38	57	26	21	28	27
ENSMUSG00000018259	0	0	0	0	0	0	0	0	0	0	0	0	0
ENSMUSG00000018263	0	0	0	0	0	0	0	0	0	0	0	0	0
ENSMUSG00000018286	1018	1209	810	361	220	289	415	557	778	424	665	421	530
ENSMUSG00000018287	487	427	352	183	116	145	145	369	329	238	471	291	362
ENSMUSG00000018293	2399	3451	2397	2080	1050	1270	2378	2119	2445	4315	5810	2781	3108
ENSMUSG00000018322	224	265	226	128	83	113	157	145	278	172	329	172	213
ENSMUSG00000018326	1546	1182	1586	1017	1021	1086	1060	975	1867	827	1451	954	1265
ENSMUSG00000018334	30	26	44	34	16	29	23	26	41	31	49	20	30
ENSMUSG00000018339	56	73	46	79	30	27	69	40	33	28	77	26	26
ENSMUSG00000018340	1147	1234	1103	990	562	610	1071	996	2143	1867	3078	1619	1990
ENSMUSG00000018341	14	2	17	8	15	15	0	6	5	2	15	8	10
ENSMUSG00000018347	47	60	68	50	53	36	71	47	81	27	75	42	53
ENSMUSG00000018362	50	19	28	24	17	30	4	6	34	59	126	106	157
ENSMUSG00000018363	623	410	548	475	510	594	327	389	543	218	532	427	420
ENSMUSG00000018372	69	46	52	48	57	61	35	47	87	40	81	52	58
ENSMUSG00000018377	218	194	205	202	167	197	137	139	216	114	186	114	161
ENSMUSG00000018378	41	35	34	35	15	18	39	20	30	9	37	20	7
ENSMUSG00000018379	1342	1052	1386	734	902	1023	652	654	1227	317	654	561	692
ENSMUSG00000018381	31	14	9	14	11	10	19	16	29	8	18	8	15
ENSMUSG00000018387	522	608	730	627	462	604	808	810	1030	127	164	111	220
ENSMUSG00000018395	30	33	35	27	25	26	21	17	26	10	13	13	22
ENSMUSG00000018398	12	10	14	9	7	7	10	16	10	5	17	11	12
ENSMUSG00000018401	722	461	685	406	676	762	361	525	1039	215	330	333	406
ENSMUSG00000018405	38	64	47	52	35	34	16	29	48	46	72	52	70
ENSMUSG00000018411	63	86	63	109	69	84	650	516	1368	26	35	26	31
ENSMUSG00000018412	414	259	389	267	317	376	211	347	501	306	463	278	317
ENSMUSG00000018415	104	77	77	70	79	95	81	74	132	36	69	37	46
ENSMUSG00000018417	2147	1590	2194	1376	2088	2392	875	1176	1835	439	801	681	948
ENSMUSG00000018425	567	378	540	153	146	192	89	116	292	84	140	116	164
ENSMUSG00000018427	506	326	363	77	314	325	288	521	603	51	114	102	304
ENSMUSG00000018428	1607	1157	1349	1124	976	1244	1036	1001	1468	799	1256	945	1087
ENSMUSG00000018433	186	146	180	162	137	165	99	100	258	67	105	59	125
ENSMUSG00000018442	732	615	707	291	265	268	346	357	432	224	418	373	517
ENSMUSG00000018446	627	659	692	553	422	546	554	437	1003	400	606	541	695
ENSMUSG00000018449	169	191	225	213	152	184	127	148	292	164	247	148	188
ENSMUSG00000018459	281	231	284	445	251	334	316	384	529	949	1997	812	992
ENSMUSG00000018470	4	12	9	6	8	3	4	4	7	4	11	0	3
ENSMUSG00000018474	1081	1046	1135	2005	1428	1772	102	146	275	831	1525	904	847
ENSMUSG00000018476	237	365	274	304	248	318	298	321	381	548	728	193	150
ENSMUSG00000018481	380	325	428	242	293	309	165	199	369	172	303	295	327
ENSMUSG00000018486	38	17	17	13	7	6	8	7	38	6	20	8	10
ENSMUSG00000018500	0	0	0	1	2	1	0	0	1	0	0	0	0
ENSMUSG00000018501	1026	703	876	677	992	1096	331	556	647	585	976	653	735
ENSMUSG00000018507	16	4	16	11	2	6	10	4	18	4	4	4	7
ENSMUSG00000018509	138	209	152	93	63	61	134	97	186	181	304	109	120
ENSMUSG00000018537	76	126	101	118	80	91	112	138	157	321	626	172	181
ENSMUSG00000018541	159	132	130	92	93	105	93	128	165	64	96	72	60
ENSMUSG00000018543	0	0	0	0	0	1	0	0	1	0	0	0	0
ENSMUSG00000018547	369	371	393	287	323	371	303	351	651	265	449	244	265
ENSMUSG00000018548	167	118	129	60	98	113	77	119	171	59	99	99	122
ENSMUSG00000018554	1	0	1	0	0	1	0	0	0	1	1	1	0
ENSMUSG00000018559	290	486	328	242	119	156	337	252	401	234	349	226	267
ENSMUSG00000018565	294	245	267	196	116	145	167	228	371	182	342	211	305
ENSMUSG00000018566	16	27	14	0	1	2	15	12	17	25	55	22	17
ENSMUSG00000018567	3038	4185	3866	2044	1542	1783	1621	1781	3798	2654	4579	2217	2681
ENSMUSG00000018569	7	6	3	6	3	3	6	2	4	1	4	1	1
ENSMUSG00000018570	6	6	0	0	2	2	3	3	5	1	2	1	3
ENSMUSG00000018572	361	279	242	236	130	190	217	329	362	187	333	205	185
ENSMUSG00000018574	1980	1245	1619	1579	1296	1562	1580	1524	2521	719	1525	1361	1592
ENSMUSG00000018581	2	2	4	0	3	4	2	2	5	3	6	4	7
ENSMUSG00000018583	533	489	612	353	344	445	331	306	666	80	105	73	78
ENSMUSG00000018585	720	800	643	622	331	358	446	356	894	369	634	344	457
ENSMUSG00000018589	0	0	0	0	0	0	0	0	0	0	1	0	0
ENSMUSG00000018593	576	494	586	1157	661	806	607	945	907	584	1076	389	609
ENSMUSG00000018595	2	0	2	2	2	2	2	1	3	2	4	1	1
ENSMUSG00000018599	383	320	340	170	138	170	171	197	346	102	293	189	280
ENSMUSG00000018604	468	492	609	240	156	216	328	493	397	492	802	433	578
ENSMUSG00000018620	0	0	0	0	0	0	0	0	0	0	0	0	0
ENSMUSG00000018623	1	1	4	0	0	0	0	0	0	0	0	0	0
ENSMUSG00000018634	0	0	0	0	0	0	9	2	10	0	0	0	0
ENSMUSG00000018648	1	10	12	21	23	19	15	13	19	76	107	26	85
ENSMUSG00000018651	84	84	83	83	59	82	44	29	97	23	43	34	39
ENSMUSG00000018654	34	1	24	16	14	7	20	20	24	10	18	18	20
ENSMUSG00000018656	0	0	0	0	0	0	0	0	0	0	0	0	0
ENSMUSG00000018659	2529	2537	2318	1320	923	1130	607	551	889	308	709	491	544
ENSMUSG00000018661	243	182	233	313	189	226	173	169	285	179	321	134	227
ENSMUSG00000018666	139	106	96	118	103	107	93	112	192	65	129	76	97
ENSMUSG00000018669	831	621	756	793	493	660	480	478	780	233	552	369	445
ENSMUSG00000018672	219	360	212	111	48	67	96	125	217	223	406	136	168
ENSMUSG00000018677	4977	4868	4036	7264	2745	3310	5205	3592	6334	3263	5177	3610	4761
ENSMUSG00000018678	39	36	53	50	28	34	75	42	51	48	71	37	23
ENSMUSG00000018697	162	158	171	96	113	111	91	102	210	198	484	149	138
ENSMUSG00000018698	0	0	1	0	1	0	0	2	4	0	1	1	0
ENSMUSG00000018707	1429	1079	1188	1586	1546	1979	999	1302	1678	1078	1828	1220	1606
ENSMUSG00000018727	35	58	58	248	97	153	57	77	170	18	44	39	10
ENSMUSG00000018733	20	13	17	11	10	19	14	27	31	9	30	8	23
ENSMUSG00000018736	168	100	83	90	96	108	88	109	182	96	187	226	165
ENSMUSG00000018740	19	24	39	23	19	25	44	44	71	62	119	49	63
ENSMUSG00000018750	199	222	220	177	147	205	153	175	222	277	400	187	198
ENSMUSG00000018752	0	0	0	0	0	0	0	0	0	0	0	0	0
ENSMUSG00000018761	959	733	710	692	448	395	486	559	961	574	1386	829	969
ENSMUSG00000018765	586	507	413	340	250	310	234	283	465	112	290	231	189
ENSMUSG00000018770	5808	6215	5838	3499	2638	3256	2270	4256	4798	4945	5749	3898	5250
ENSMUSG00000018774	86	58	64	38	16	17	47	126	105	69	72	35	48
ENSMUSG00000018776	0	0	1	0	0	1	0	0	0	1	0	0	1
ENSMUSG00000018796	12889	9832	11473	9172	9277	11649	11052	14481	25927	2062	4689	2997	3915
ENSMUSG00000018800	74	32	56	55	97	93	46	55	93	16	22	25	28
ENSMUSG00000018809	56	36	34	28	25	25	83	78	123	15	40	24	23
ENSMUSG00000018819	31	18	20	23	5	6	20	23	26	23	22	13	24
ENSMUSG00000018820	350	237	243	319	254	280	256	228	399	47	81	58	49
ENSMUSG00000018821	331	378	253	190	121	154	69	75	112	86	113	119	121
ENSMUSG00000018822	1	1	3	0	0	0	0	1	0	0	1	0	0
ENSMUSG00000018830	51	25	40	88	49	70	28	42	41	20	419	11	26
ENSMUSG00000018841	190	135	191	109	100	132	184	160	247	153	411	164	251
ENSMUSG00000018844	1	3	0	0	5	8	0	0	2	0	0	0	0
ENSMUSG00000018845	15	13	31	4	4	3	23	5	8	2	0	2	0
ENSMUSG00000018846	1068	745	991	563	877	848	643	671	1453	251	409	431	467
ENSMUSG00000018848	350	371	429	396	332	385	199	290	572	278	420	303	441
[truncated: 19,762 more rows]

## Sheet: DESeq_normalized
Gene expression values
gene_id	b1	b2	b3	cast1	cast2	cast3	s1	s3	s4	car3	car4	car5	car6	bmean	castmean	smean	carmean	bmedian	castmedian	smedian	carmedian
ENSMUSG00000000001	1070.93	860.081	1193.56	864.761	1217.96	1200.7	778.753	778.33	917.583	724.209	696.101	1160.19	1195.42	1041.52	1094.47	824.888	943.979	1070.93	1200.7	778.753	942.198
ENSMUSG00000000003	0	0	0	0	0	0	0	0	0	0	0	0	0	0	0	0	0	0	0	0	0
ENSMUSG00000000028	16.7096	8.37741	8.97411	14.6404	17.4827	12.0673	18.8503	7.07572	7.00445	15.311	9.70484	17.0423	13.3509	11.3537	14.7301	10.9768	13.8522	8.97411	14.6404	7.07572	14.3309
ENSMUSG00000000037	0	0	0	0	2.33103	0	9.42515	1.01082	1.27354	0	0	0	0	0	0.77701	3.90317	0	0	0	1.27354	0
ENSMUSG00000000049	3240.9	4119.83	4907.21	3802.61	3116.59	3314.48	2907.66	7884.38	4127.53	6470.42	9730.42	7552.35	8356.64	4089.31	3411.23	4973.19	8027.46	4119.83	3314.48	4127.53	7954.49
ENSMUSG00000000056	486.856	429.11	468.285	1339.11	949.894	977.451	368.759	311.332	559.719	629.281	740.214	739.373	406.689	461.417	1088.82	413.27	628.889	468.285	977.451	368.759	684.327
ENSMUSG00000000058	57.724	33.5097	42.4231	38.0651	33.7999	38.2131	23.5629	34.3678	40.1164	19.9043	25.5855	39.3284	39.0257	44.5522	36.6927	32.6824	30.961	42.4231	38.0651	34.3678	32.3056
ENSMUSG00000000078	100.257	75.3967	106.058	64.4179	83.917	40.2243	151.981	102.093	108.887	156.172	311.437	301.517	298.855	93.9039	62.8531	120.987	266.995	100.257	64.4179	108.887	300.186
ENSMUSG00000000085	97.9788	140.554	111.768	112.243	85.0825	84.4711	135.487	99.0601	101.246	128.612	130.574	93.0771	103.726	116.767	93.9323	111.931	113.997	111.768	85.0825	101.246	116.169
ENSMUSG00000000088	388.877	584.557	411.993	410.908	340.33	336.879	389.966	530.679	321.568	1849.57	1119.59	820.652	1033.15	461.809	362.706	414.071	1205.74	411.993	340.33	389.966	1076.37
ENSMUSG00000000093	16.7096	35.3713	38.3439	51.7295	20.9793	18.1009	56.5509	37.4003	20.3766	56.6506	62.6403	20.9751	16.4319	30.1416	30.2699	38.1092	39.1745	35.3713	20.9793	37.4003	38.8129
ENSMUSG00000000094	0	0	0	0	0	0	0	0	0	0	0	0	2.05398	0	0	0	0.513496	0	0	0	0
ENSMUSG00000000103	0	0	0	0	0	0	0	0	0	0	0	0	0	0	0	0	0	0	0	0	0
ENSMUSG00000000120	66.0788	51.1953	64.4504	67.346	66.4343	81.4542	111.924	121.298	80.8695	205.167	157.924	154.692	185.886	60.5748	71.7448	104.697	175.917	64.4504	67.346	111.924	171.905
ENSMUSG00000000125	0	0	0	0	1.16551	0	0	0	1.27354	0	0	0	0	0	0.388505	0.424512	0	0	0	0	0
ENSMUSG00000000126	9.11431	10.2391	6.52662	7.80823	6.99309	3.01682	3.53443	4.04327	3.18384	0	7.05806	2.62189	1.02699	8.62667	5.93938	3.58718	2.67674	9.11431	6.99309	3.53443	1.82444
ENSMUSG00000000127	47.8501	75.3967	71.7929	62.4658	76.9239	69.3869	58.9072	54.5842	69.4077	24.4976	26.4677	49.8159	30.8098	65.0132	69.5922	60.9663	32.8977	71.7929	69.3869	58.9072	28.6388
ENSMUSG00000000131	442.044	398.393	431.573	916.491	675.998	718.004	586.715	573.134	614.481	1039.62	939.605	634.497	551.495	424.003	770.164	591.443	791.303	431.573	718.004	586.715	787.051
ENSMUSG00000000134	315.963	384.43	354.885	284.024	213.289	248.385	448.873	493.279	452.742	359.808	336.14	241.214	269.072	351.759	248.566	464.965	301.559	354.885	248.385	452.742	302.606
ENSMUSG00000000142	57.724	85.6358	121.558	130.788	114.22	130.729	141.377	191.045	140.726	306.22	343.198	159.935	149.941	88.306	125.246	157.716	239.824	85.6358	130.729	141.377	233.077
ENSMUSG00000000148	109.372	121.938	115.848	190.326	122.379	137.768	213.244	244.618	189.12	217.416	183.51	146.826	167.4	115.719	150.158	215.661	178.788	115.848	137.768	213.244	175.455
ENSMUSG00000000149	1356.51	1325.49	1480.73	2469.35	1557.13	1523.5	1046.19	755.081	932.865	356.746	391.723	355.266	301.936	1387.58	1849.99	911.379	351.418	1356.51	1557.13	932.865	356.006
ENSMUSG00000000154	1101.31	1324.56	1183.77	1900.33	1282.07	1245.95	1581.07	2068.13	1518.69	4871.95	6250.8	4517.52	4074.08	1203.21	1476.11	1722.63	4928.59	1183.77	1282.07	1581.07	4694.73
ENSMUSG00000000157	10.6334	14.8932	5.7108	30.2569	85.0825	53.2972	0	0	0	1.5311	7.94032	6.55473	10.2699	10.4124	56.2122	0	6.57402	10.6334	53.2972	0	7.24752
ENSMUSG00000000159	119.246	128.454	141.954	147.38	178.324	143.802	47.1257	56.6058	47.1208	117.895	150.866	179.599	192.048	129.884	156.502	50.2841	160.102	128.454	147.38	47.1257	165.233
ENSMUSG00000000167	2.27858	2.79247	4.07914	3.90411	1.16551	5.02804	4.71257	3.03245	5.09414	4.59329	7.94032	0	4.10797	3.05006	3.36589	4.27972	4.1604	2.79247	3.90411	4.71257	4.35063
ENSMUSG00000000168	730.664	628.306	716.297	339.658	433.571	322.8	815.275	742.951	863.457	414.927	442.011	448.343	370.744	691.756	365.343	807.228	419.007	716.297	339.658	815.275	428.469
ENSMUSG00000000171	2285.41	2717.07	2770.55	2068.2	1849.67	1950.88	1621.13	2080.26	2061.22	2364.01	2593.84	2687.44	3226.81	2591.01	1956.25	1920.87	2718.02	2717.07	1950.88	2061.22	2640.64
ENSMUSG00000000182	0	0	0	0	0	0	0	1.01082	0	0	0	0	0	0	0	0.336939	0	0	0	0	0
ENSMUSG00000000183	0	0	0	0	0	0	0	0	0	0	0	0	0	0	0	0	0	0	0	0	0
ENSMUSG00000000184	85.0669	67.0193	102.794	80.0343	129.372	99.5552	58.9072	82.887	89.7843	53.5884	52.9355	72.102	51.3496	84.9602	102.987	77.1928	57.4939	85.0669	99.5552	82.887	53.2619
ENSMUSG00000000194	233.174	227.121	225.169	469.47	402.102	413.305	348.73	327.505	397.343	656.841	574.35	523.067	491.929	228.488	428.292	357.86	561.547	227.121	413.305	348.73	548.708
ENSMUSG00000000197	0	0	0	0	0	1.00561	0	0	0	0	0.882258	1.31095	0	0	0.335203	0	0.548301	0	0	0	0.441129
ENSMUSG00000000202	0	0	0	0	0	0	0	0	0	0	0	0	0	0	0	0	0	0	0	0	0
ENSMUSG00000000204	0	0.930824	0.815828	0.976028	1.16551	2.01122	8.247	1.01082	1.27354	13.7799	13.2339	15.7313	20.5398	0.582217	1.38425	3.51045	15.8212	0.815828	1.16551	1.27354	14.7556
ENSMUSG00000000214	0	0	0	0	0	0	0	0	0	0	0	0	0	0	0	0	0	0	0	0	0
ENSMUSG00000000215	0	0	0	0	0	0	0	0	0	0	0	0	0	0	0	0	0	0	0	0	0
ENSMUSG00000000216	3.0381	0	0.815828	0	0	0	0	0	0	0	5.29355	7.86567	3.08098	1.28464	0	0	4.06005	0.815828	0	0	4.18726
ENSMUSG00000000223	0	0	0.815828	0	2.33103	0	0	0	0	0	1.76452	0	0	0.271943	0.77701	0	0.441129	0	0	0	0
ENSMUSG00000000244	3.0381	0	6.52662	2.92809	2.33103	2.01122	0	2.02164	3.18384	3.0622	0.882258	3.93284	3.08098	3.18824	2.42344	1.73516	2.73957	3.0381	2.33103	2.02164	3.07159
ENSMUSG00000000247	21.2667	13.9624	17.9482	43.9213	20.9793	11.0617	34.1662	27.2921	15.2824	67.3683	57.3468	28.8408	20.5398	17.7258	25.3207	25.5802	43.5239	17.9482	20.9793	27.2921	43.0938
ENSMUSG00000000248	0	0	1.63166	3.90411	24.4758	9.05047	11.7814	6.06491	3.18384	0	0	0	0	0.543885	12.4768	7.01006	0	0	9.05047	6.06491	0
ENSMUSG00000000253	6.07621	9.30824	1.63166	6.8322	6.99309	7.03926	21.2066	5.05409	12.7354	15.311	9.70484	15.7313	15.4049	5.67203	6.95485	12.9987	14.038	6.07621	6.99309	12.7354	15.3579
ENSMUSG00000000263	0	0	0	0	0	0	0	0	0	0	0	0	0	0	0	0	0	0	0	0	0
ENSMUSG00000000266	57.724	50.2645	74.2404	42.9452	109.558	79.443	17.6722	37.4003	35.0222	70.4305	46.7597	64.2363	67.7815	60.7429	77.3155	30.0315	62.302	57.724	79.443	35.0222	66.0089
ENSMUSG00000000275	1112.71	950.371	1189.48	920.395	1115.4	1072.98	874.182	1231.18	1370.96	750.238	642.284	774.768	1041.37	1084.18	1036.26	1158.77	802.165	1112.71	1072.98	1231.18	762.503
ENSMUSG00000000276	31.1406	31.648	35.0806	27.3288	30.3034	27.1514	23.5629	29.3137	40.1164	24.4976	13.2339	47.194	35.9447	32.6231	28.2612	30.9977	30.2175	31.648	27.3288	29.3137	30.2211
ENSMUSG00000000278	482.299	525.915	496.023	232.295	242.427	282.576	775.218	569.09	598.562	675.214	623.756	681.691	657.275	501.413	252.433	647.624	659.484	496.023	242.427	598.562	666.245
ENSMUSG00000000282	105.574	137.762	87.2936	182.517	107.227	102.572	246.232	181.947	163.013	545.071	547	314.627	189.994	110.21	130.772	197.064	399.173	105.574	107.227	181.947	429.849
ENSMUSG00000000290	34.1787	21.4089	45.6864	23.4247	20.9793	13.0729	12.9596	39.4219	22.9237	76.5549	44.1129	66.8582	85.2404	33.758	19.1589	25.1017	68.1916	34.1787	20.9793	22.9237	71.7065
ENSMUSG00000000295	6.07621	13.9624	11.4216	21.4726	20.9793	19.1066	42.4132	21.2272	43.3002	24.4976	26.4677	20.9751	19.5129	10.4867	20.5195	35.6469	22.8633	11.4216	20.9793	42.4132	22.7363
ENSMUSG00000000296	79.7502	87.4974	73.4245	81.0104	61.7723	35.1963	108.389	138.482	79.596	15.311	18.5274	6.55473	13.3509	80.2241	59.3263	108.822	13.436	79.7502	61.7723	108.389	14.3309
ENSMUSG00000000301	2109.2	2607.24	2257.4	2481.06	2090.93	1776.91	1969.86	1779.04	2152.28	2102.2	2329.16	2227.3	2196.74	2324.61	2116.3	1967.06	2213.85	2257.4	2090.93	1969.86	2212.02
ENSMUSG00000000303	560.53	806.093	662.452	524.127	782.06	819.57	917.774	637.826	371.236	814.544	854.908	761.659	1155.37	676.359	708.586	642.279	896.619	662.452	782.06	637.826	834.726
ENSMUSG00000000305	9.87384	12.1007	5.7108	21.4726	19.8137	20.1122	0	0	0	39.8085	28.2323	18.3532	19.5129	9.22845	20.4662	0	26.4767	9.87384	20.1122	0	23.8726
ENSMUSG00000000308	0.759526	2.79247	0	0.976028	1.16551	0	0	0	2.54707	1.5311	2.64677	1.31095	0	1.184	0.713848	0.849024	1.3722	0.759526	0.976028	0	1.42102
ENSMUSG00000000317	37.2168	33.5097	36.7123	13.6644	13.9862	14.0785	23.5629	33.357	26.1075	10.7177	21.1742	5.24378	20.5398	35.8129	13.9097	27.6758	14.4189	36.7123	13.9862	26.1075	15.6288
ENSMUSG00000000318	0.759526	0	0.815828	0	2.33103	0	0	9.09736	5.73091	12.2488	7.94032	9.17662	8.21594	0.525118	0.77701	4.94276	9.39541	0.759526	0	5.73091	8.69628
ENSMUSG00000000320	5.31668	10.2391	10.6058	3.90411	10.4896	4.02243	0	3.03245	3.18384	36.7463	27.35	15.7313	29.7828	8.7205	6.13872	2.0721	27.4026	10.2391	4.02243	3.03245	28.5664
ENSMUSG00000000325	646.357	914.069	517.235	1466.97	1332.18	1385.73	345.196	246.64	266.169	388.899	426.131	550.597	395.392	692.554	1394.96	286.002	440.255	646.357	1385.73	266.169	410.761
ENSMUSG00000000326	8641.13	8801.87	6952.49	10027.7	9134.14	9019.3	19411.1	18253.3	16917	2435.98	2923.8	2560.28	1841.4	8131.83	9393.72	18193.8	2440.36	8641.13	9134.14	18253.3	2498.13
ENSMUSG00000000339	35.6977	32.5788	41.6072	40.9932	62.9378	45.2524	76.5793	39.4219	64.3136	97.9903	87.3435	107.497	101.672	36.6279	49.7278	60.1049	98.6259	35.6977	45.2524	64.3136	99.8312
ENSMUSG00000000340	829.402	753.967	840.303	712.501	752.922	840.688	339.305	394.219	425.361	857.415	867.26	862.602	1139.96	807.891	768.704	386.295	931.809	829.402	752.922	394.219	864.931
ENSMUSG00000000346	1651.97	1712.72	1894.35	997.501	934.743	983.485	1100.39	1565.76	1494.49	1825.07	2106.83	1607.22	1479.9	1753.01	971.909	1386.88	1754.75	1712.72	983.485	1494.49	1716.14
ENSMUSG00000000355	248.365	253.184	276.566	118.099	177.158	199.11	130.774	191.045	174.474	218.947	238.21	352.644	341.988	259.372	164.789	165.431	287.947	253.184	177.158	174.474	290.099
ENSMUSG00000000359	4.55716	3.7233	2.44748	6.8322	2.33103	4.02243	4.71257	10.1082	2.54707	6.12439	2.64677	1.31095	1.02699	3.57598	4.39522	5.78927	2.77728	3.7233	4.02243	4.71257	1.97886
ENSMUSG00000000365	0	0	0	0	0	0	0	0	0	0	0	0	0	0	0	0	0	0	0	0	0
ENSMUSG00000000374	265.075	235.498	227.616	374.795	397.44	406.266	364.046	493.279	412.626	506.793	674.045	516.512	554.576	242.73	392.834	423.317	562.982	235.498	397.44	412.626	535.544
ENSMUSG00000000378	192.92	217.813	203.141	212.774	203.965	220.228	261.548	242.596	238.151	370.526	334.376	390.662	312.206	204.625	212.322	247.432	351.942	203.141	212.774	242.596	352.451
ENSMUSG00000000381	0	0	0	0	1.16551	0	0	2.02164	0	0	0	0	0	0	0.388505	0.673878	0	0	0	0	0
ENSMUSG00000000384	346.344	323.927	346.727	586.593	348.489	367.047	613.813	465.987	417.72	716.554	817.853	718.398	598.736	338.999	434.043	499.173	712.885	346.344	367.047	465.987	717.476
ENSMUSG00000000385	28.1025	41.8871	30.1856	36.113	69.9309	75.4206	109.567	60.6491	59.8562	310.813	338.787	315.938	531.982	33.3917	60.4882	76.6909	374.38	30.1856	69.9309	60.6491	327.362
ENSMUSG00000000386	9.11431	30.7172	25.2907	10.7363	24.4758	13.0729	114.28	95.0169	124.807	94.9281	82.05	83.9005	181.778	21.7074	16.095	111.368	110.664	25.2907	13.0729	114.28	89.4143
ENSMUSG00000000392	0	0	0	7.80823	6.99309	8.04486	1.17814	5.05409	8.91475	0	0.882258	0	0	0	7.61539	5.04899	0.220564	0	7.80823	5.05409	0
ENSMUSG00000000394	0	0	0	0	0	0	0	0	0	0	0	0	0	0	0	0	0	0	0	0	0
ENSMUSG00000000399	695.726	685.086	767.694	995.549	810.032	946.277	777.575	508.441	855.816	601.721	622.874	852.114	823.648	716.169	917.286	713.944	725.089	695.726	946.277	777.575	723.261
ENSMUSG00000000402	0	0.930824	0	0	1.16551	0	0	0	0	341.435	317.613	175.667	172.535	0.310275	0.388505	0	251.812	0	0	0	246.64
ENSMUSG00000000409	5.31668	0.930824	4.89497	6.8322	2.33103	2.01122	0	5.05409	8.27798	6.12439	3.52903	18.3532	16.4319	3.71416	3.72481	4.44402	11.1096	4.89497	2.33103	5.05409	11.2781
ENSMUSG00000000411	0.759526	0	0	0	1.16551	0	0	0	1.27354	1.5311	0	0	0	0.253175	0.388505	0.424512	0.382774	0	0	0	0
ENSMUSG00000000416	5.31668	0.930824	3.26331	4.88014	9.32411	7.03926	12.9596	1.01082	2.54707	32.1531	29.9968	38.0174	35.9447	3.17027	7.08117	5.50582	34.028	3.26331	7.03926	2.54707	34.0489
ENSMUSG00000000420	439.766	326.719	438.915	297.689	409.096	361.013	682.145	652.988	905.484	261.818	286.734	485.05	517.604	401.8	355.932	746.872	387.801	438.915	361.013	682.145	385.892
ENSMUSG00000000435	0	0	0	0	1.16551	0	0	0	0	0	0	0	0	0	0.388505	0	0	0	0	0	0
ENSMUSG00000000439	131.398	141.485	149.297	185.445	125.876	135.757	206.175	193.066	171.927	209.76	237.327	209.751	189.994	140.727	149.026	190.39	211.708	141.485	135.757	193.066	209.756
ENSMUSG00000000440	205.832	106.114	109.321	0.976028	41.9585	3.01682	128.418	133.428	116.529	171.483	184.392	112.741	106.807	140.422	15.3171	126.125	143.856	109.321	3.01682	128.418	142.112
ENSMUSG00000000441	1105.11	881.49	1040.18	1052.16	1048.96	1116.22	1198.17	1229.15	1481.12	927.845	1026.07	1137.9	1061.91	1008.93	1072.45	1302.82	1038.43	1040.18	1052.16	1229.15	1043.99
ENSMUSG00000000486	7.59526	11.1699	13.8691	11.7123	2.33103	2.01122	3.53443	7.07572	5.09414	33.6842	9.70484	22.2861	21.5668	10.8781	5.35153	5.23477	21.8105	11.1699	2.33103	5.09414	21.9265
ENSMUSG00000000489	12.9119	11.1699	8.97411	35.137	20.9793	24.1346	11.7814	14.1514	12.0986	24.4976	17.6452	28.8408	15.4049	11.0186	26.7503	12.6772	21.5971	11.1699	24.1346	12.0986	21.0714
ENSMUSG00000000530	34.9382	39.0946	46.5022	65.3939	51.2826	51.286	27.0973	37.4003	27.381	29.0909	19.4097	20.9751	21.5668	40.1783	55.9875	30.6262	22.7606	39.0946	51.286	27.381	21.271
ENSMUSG00000000531	12.1524	18.6165	8.97411	12.6884	5.82757	10.0561	5.89072	21.2272	10.1883	18.3732	8.82258	7.86567	8.21594	13.2477	9.52401	12.4354	10.8193	12.1524	10.0561	10.1883	8.51926
ENSMUSG00000000532	142.791	150.793	122.374	364.059	263.406	208.161	133.13	146.569	159.829	166.89	173.805	170.423	151.995	138.653	278.542	146.509	165.778	142.791	263.406	146.569	168.656
ENSMUSG00000000538	538.504	532.431	552.316	611.97	484.854	408.277	613.813	522.593	573.091	688.994	812.56	516.512	520.685	541.084	501.7	569.832	634.688	538.504	484.854	573.091	604.84
ENSMUSG00000000544	0	0	0	0	0	0	0	0	0	0	0	0	0	0	0	0	0	0	0	0	0
ENSMUSG00000000552	198.996	391.877	306.751	97.6028	95.5722	87.4879	381.719	294.148	157.918	393.492	394.369	171.734	238.262	299.208	93.5543	277.928	299.464	306.751	95.5722	294.148	315.877
ENSMUSG00000000555	231.655	306.241	334.49	185.445	265.737	284.587	405.281	408.37	396.707	505.262	269.971	222.861	419.013	290.795	245.257	403.453	354.277	306.241	265.737	405.281	344.492
ENSMUSG00000000560	0	0	0	0	0	0	0	0	0	0	0	0	0	0	0	0	0	0	0	0	0
ENSMUSG00000000561	71.3954	57.7111	70.1612	104.435	104.896	90.5047	97.7859	72.7789	75.1386	81.1482	82.9322	97.0099	83.1864	66.4226	99.9453	81.9011	86.0692	70.1612	104.435	75.1386	83.0593
ENSMUSG00000000562	1.51905	0.930824	0	0	0	1.00561	0	0	0	0	0	0	1.02699	0.816625	0.335203	0	0.256748	0.930824	0	0	0
ENSMUSG00000000563	1670.2	1878.4	1844.59	774.967	749.426	803.481	1270.04	1313.05	1417.45	1159.04	1064	1132.66	1167.69	1797.73	775.958	1333.51	1130.85	1844.59	774.967	1313.05	1145.85
ENSMUSG00000000567	71.3954	118.215	102.794	29.2809	51.2826	47.2636	201.463	339.635	134.358	53.5884	23.821	22.2861	28.7558	97.4681	42.609	225.152	32.1128	102.794	47.2636	201.463	26.2884
ENSMUSG00000000568	374.446	502.645	422.599	309.401	340.33	294.643	371.115	265.845	321.568	286.315	269.089	280.542	288.585	433.23	314.791	319.509	281.133	422.599	309.401	321.568	283.429
ENSMUSG00000000579	0	0	0	0	0	0	0	0	0	1.5311	1.76452	0	0	0	0	0	0.823903	0	0	0	0.765549
ENSMUSG00000000581	527.111	469.135	573.527	223.51	306.53	286.598	249.766	258.769	340.671	76.5549	61.7581	103.565	124.266	523.258	272.213	283.069	91.5359	527.111	286.598	258.769	90.0598
ENSMUSG00000000594	2630.24	3928.08	3149.1	1545.05	1370.64	1202.71	842.373	1032.04	952.605	12700.5	14724.9	9691.82	9275.79	3235.8	1372.8	942.341	11598.2	3149.1	1370.64	952.605	11196.1
ENSMUSG00000000600	145.829	110.768	155.823	79.0583	156.179	133.746	120.171	109.168	122.259	48.9951	33.5258	47.194	85.2404	137.473	122.994	117.199	53.7388	145.829	133.746	120.171	48.0946
ENSMUSG00000000605	734.462	625.514	731.798	468.494	646.86	627.499	167.296	129.385	207.586	183.732	206.448	310.694	338.907	697.258	580.951	168.089	259.945	731.798	627.499	167.296	258.571
ENSMUSG00000000606	0	0	0	0	0	0	0	0	0	0	0	0	0	0	0	0	0	0	0	0	0
ENSMUSG00000000617	0	0	0	0	0	0	0	0	0	0	0	0	0	0	0	0	0	0	0	0	0
ENSMUSG00000000627	3.0381	0	1.63166	1.95206	0	0	23.5629	25.2704	29.9281	0	0	0	0	1.55659	0.650686	26.2538	0	1.63166	0	25.2704	0
ENSMUSG00000000628	7.59526	2.79247	10.6058	1.95206	3.49654	1.00561	3.53443	3.03245	9.55152	3.0622	2.64677	3.93284	2.05398	6.99783	2.1514	5.3728	2.92395	7.59526	1.95206	3.53443	2.85448
ENSMUSG00000000631	753.45	776.307	591.475	1196.61	939.405	984.49	637.376	663.096	552.078	711.96	868.142	741.995	505.28	707.077	1040.17	617.517	706.844	753.45	984.49	637.376	726.978
ENSMUSG00000000632	0	0	0	5.85617	4.66206	3.01682	0	0	0	9.18659	4.41129	1.31095	4.10797	0	4.51168	0	4.7542	0	4.66206	0	4.25963
ENSMUSG00000000673	4598.17	5987.99	4594.74	2725.07	2003.52	1859.37	7119.52	9895.9	6959.87	6226.97	7226.57	5567.58	5803.53	5060.3	2195.99	7991.77	6206.17	4598.17	2003.52	7119.52	6015.25
ENSMUSG00000000682	9.11431	6.51577	13.8691	2.92809	1.16551	0	8.247	15.1623	5.09414	9.18659	3.52903	9.17662	8.21594	9.83305	1.36453	9.50114	7.52704	9.11431	1.16551	8.247	8.69628
ENSMUSG00000000686	6.83573	3.7233	6.52662	12.6884	16.3172	9.05047	22.3847	11.119	12.0986	91.8659	100.577	57.6816	77.0244	5.69522	12.6853	15.2008	81.7873	6.52662	12.6884	12.0986	84.4451
ENSMUSG00000000690	0	2.79247	5.7108	1.95206	3.49654	0	1.17814	2.02164	2.54707	4.59329	6.17581	5.24378	1.02699	2.83442	1.8162	1.91562	4.25997	2.79247	1.95206	2.02164	4.91854
ENSMUSG00000000693	20.5072	14.8932	27.7382	15.6165	10.4896	18.1009	23.5629	18.1947	19.103	10.7177	18.5274	11.7985	6.16195	21.0462	14.7357	20.2869	11.8014	20.5072	15.6165	19.103	11.2581
ENSMUSG00000000701	0	0	0	0	0	0	0	0	0	0	0	0	0	0	0	0	0	0	0	0	0
ENSMUSG00000000706	0	0	0	0	0	0	0	0	0	0	0	0	0	0	0	0	0	0	0	0	0
ENSMUSG00000000708	780.793	675.778	814.196	516.319	673.667	672.752	450.051	434.652	461.02	395.023	382.018	471.94	523.766	756.922	620.913	448.574	443.187	780.793	672.752	450.051	433.482
ENSMUSG00000000711	804.338	845.188	961.045	768.134	713.295	715.993	690.392	550.896	599.836	606.315	758.742	638.43	569.981	870.191	732.474	613.708	643.367	845.188	715.993	599.836	622.372
ENSMUSG00000000724	0	0	0	0.976028	1.16551	1.00561	0	0	0	0	0.882258	2.62189	0	0	1.04905	0	0.876037	0	1.00561	0	0.441129
ENSMUSG00000000730	0	0	0	0	0	0	0	0	0	0	0	0	0	0	0	0	0	0	0	0	0
ENSMUSG00000000731	0	0	0	0	0	0	0	0	0	0	0	0	0	0	0	0	0	0	0	0	0
ENSMUSG00000000732	3.79763	8.37741	7.34245	8.78426	10.4896	9.05047	0	6.06491	2.54707	10.7177	2.64677	7.86567	9.24293	6.50583	9.44145	2.87066	7.61826	7.34245	9.05047	2.54707	8.5543
ENSMUSG00000000738	375.206	314.618	329.595	434.333	320.516	378.109	435.913	362.884	417.72	638.468	700.513	832.45	884.24	339.806	377.653	405.505	763.918	329.595	378.109	417.72	766.481
ENSMUSG00000000739	74.4335	132.177	115.848	28.3048	52.4481	11.0617	980.215	1203.88	3083.23	0	2.64677	5.24378	0	107.486	30.6049	1755.78	1.97264	115.848	28.3048	1203.88	1.32339
ENSMUSG00000000740	62.2811	132.177	43.2389	1.95206	0	0	3.53443	4.04327	0.636768	535.884	374.96	429.99	540.198	79.2323	0.650686	2.73816	470.258	62.2811	0	3.53443	482.937
ENSMUSG00000000743	716.993	659.954	618.398	821.816	433.571	520.905	766.971	614.577	662.239	174.545	179.098	171.734	202.317	665.115	592.097	681.262	181.924	659.954	520.905	662.239	176.822
ENSMUSG00000000751	362.294	382.569	409.546	273.288	328.675	308.722	420.597	387.143	464.204	70.4305	78.521	98.3209	81.1324	384.803	303.562	423.981	82.1012	382.569	308.722	420.597	79.8267
ENSMUSG00000000753	7030.93	8034.87	6998.99	6676.03	5237.82	5313.63	7196.1	5885.99	6127.62	16525.1	15783.6	13066.2	12444.1	7354.93	5742.5	6403.24	14454.7	7030.93	5313.63	6127.62	14424.9
ENSMUSG00000000759	136.715	129.385	130.532	136.644	193.475	149.836	217.957	126.352	153.461	122.488	98.8129	82.5895	107.834	132.211	159.985	165.923	102.931	130.532	149.836	153.461	103.324
ENSMUSG00000000766	0	0	0	0	0	0	0	0	0	0	0	0	0	0	0	0	0	0	0	0	0
ENSMUSG00000000776	53.9263	62.3652	69.3454	117.123	64.1033	71.3982	54.1946	78.8438	94.8784	64.3061	87.3435	119.296	94.4833	61.879	84.2083	75.9723	91.3572	62.3652	71.3982	78.8438	90.9134
ENSMUSG00000000782	40.2549	44.6795	35.0806	28.3048	39.6275	22.1234	53.0165	71.7681	72.5916	52.0573	28.2323	24.908	13.3509	40.005	30.0186	65.792	29.6371	40.2549	28.3048	71.7681	26.5701
ENSMUSG00000000787	1705.9	1324.56	1670.82	1218.08	2313.55	2220.38	963.721	1270.6	1093.33	813.013	826.676	1161.5	1390.55	1567.09	1917.34	1109.22	1047.93	1670.82	2220.38	1093.33	994.086
ENSMUSG00000000791	8.35479	11.1699	8.97411	16.5925	5.82757	9.05047	17.6722	21.2272	13.3721	26.0287	17.6452	30.1517	16.4319	9.49959	10.4902	17.4238	22.5644	8.97411	9.05047	17.6722	21.8369
ENSMUSG00000000792	0	0	0	0	0	0	0	0	0	0	0.882258	0	0	0	0	0	0.220564	0	0	0	0
ENSMUSG00000000794	0	0	0	1.95206	1.16551	0	0	0	1.9103	0	0	0	0	0	1.03919	0.636768	0	0	1.16551	0	0
ENSMUSG00000000804	284.822	221.536	262.697	149.332	333.337	293.638	215.6	206.207	215.864	159.234	217.035	296.274	257.775	256.352	258.769	212.557	232.58	262.697	293.638	215.6	237.405
ENSMUSG00000000805	0	0	0	0	0	0	0	0	0	12.2488	14.1161	11.7985	9.24293	0	0	0	11.8516	0	0	0	12.0236
ENSMUSG00000000811	102.536	100.529	71.7929	170.805	124.71	128.718	155.515	95.0169	161.102	67.3683	36.1726	91.7662	56.4846	91.6193	141.411	137.211	62.9479	100.529	128.718	155.515	61.9264
ENSMUSG00000000817	0.759526	0.930824	3.26331	0.976028	0	0	0	1.01082	1.27354	4.59329	0.882258	1.31095	3.08098	1.65122	0.325343	0.761451	2.46687	0.930824	0	1.01082	2.19596
ENSMUSG00000000823	423.056	339.751	356.517	639.299	644.529	574.202	329.88	500.355	527.881	569.568	523.179	547.975	500.145	373.108	619.343	452.705	535.217	356.517	639.299	500.355	535.577
ENSMUSG00000000826	741.297	653.438	754.641	733.973	867.143	789.402	812.919	961.288	1037.93	425.645	360.843	500.781	524.793	716.459	796.839	937.38	453.016	741.297	789.402	961.288	463.213
ENSMUSG00000000827	289.379	302.518	258.617	266.456	268.068	266.486	216.778	339.635	240.062	396.554	422.602	432.612	399.5	283.505	267.003	265.492	412.817	289.379	266.486	240.062	411.051
ENSMUSG00000000838	207.351	215.02	243.117	143.476	182.986	159.892	182.612	135.45	187.847	76.5549	99.6951	138.96	132.482	221.829	162.118	168.636	111.923	215.02	159.892	182.612	116.089
ENSMUSG00000000861	1.51905	2.79247	0.815828	1.95206	0	1.00561	3.53443	1.01082	0.636768	0	1.76452	1.31095	1.02699	1.70912	0.985888	1.72734	1.02561	1.51905	1.00561	1.01082	1.16897
ENSMUSG00000000869	6.83573	0	0.815828	0.976028	0	3.01682	0	1.01082	4.45738	9.18659	0.882258	1.31095	3.08098	2.55052	1.33095	1.82273	3.61519	0.815828	0.976028	1.01082	2.19596
ENSMUSG00000000876	1182.58	1116.99	943.097	822.792	998.846	1203.71	1470.32	1590.02	1286.27	895.692	915.784	905.863	1379.25	1080.89	1008.45	1448.87	1024.15	1116.99	998.846	1470.32	910.823
ENSMUSG00000000881	205.072	236.429	212.115	157.141	194.641	188.049	153.159	113.212	146.457	211.291	173.805	156.002	119.131	217.872	179.943	137.609	165.057	212.115	188.049	146.457	164.904
ENSMUSG00000000884	23.5453	23.2706	16.3166	64.4179	38.462	30.1682	78.9356	86.9303	71.318	3.0622	22.9387	5.24378	10.2699	21.0442	44.3494	79.0613	10.3787	23.2706	38.462	78.9356	7.75685
ENSMUSG00000000889	0	0	0	0	0	0	0	0	0.636768	0	0	0	0	0	0	0.212256	0	0	0	0	0
ENSMUSG00000000901	9.87384	13.9624	9.78994	14.6404	5.82757	9.05047	3.53443	10.1082	1.9103	3.0622	10.5871	2.62189	2.05398	11.2087	9.83949	5.1843	4.58129	9.87384	9.05047	3.53443	2.84204
ENSMUSG00000000902	189.122	262.492	245.564	258.648	194.641	197.099	241.519	241.585	232.42	402.679	387.311	342.157	413.878	232.393	216.796	238.508	386.506	245.564	197.099	241.519	394.995
ENSMUSG00000000903	1.51905	3.7233	0	0.976028	0	1.00561	0	2.02164	0	0	0.882258	0	0	1.74745	0.660545	0.673878	0.220564	1.51905	0.976028	0	0
ENSMUSG00000000915	259.758	235.498	168.876	169.829	132.869	137.768	309.852	309.31	217.138	157.703	128.81	141.582	209.506	221.378	146.822	278.767	159.4	235.498	137.768	309.31	149.643
ENSMUSG00000000916	86.586	80.9817	81.5828	121.028	85.0825	99.5552	386.431	233.499	324.115	101.052	110.282	111.43	106.807	83.0501	101.888	314.682	107.393	81.5828	99.5552	324.115	108.545
ENSMUSG00000000934	223.301	278.316	230.879	255.719	238.93	290.621	249.766	191.045	180.842	237.32	307.908	259.567	298.855	244.165	261.757	207.218	275.912	230.879	255.719	191.045	279.211
ENSMUSG00000000938	0	0	0	0	0	0	0	0	0	0	0	0	0	0	0	0	0	0	0	0	0
ENSMUSG00000000942	0	3.7233	4.89497	3.90411	1.16551	6.03365	3.53443	6.06491	3.18384	7.65549	14.9984	11.7985	10.2699	2.87275	3.70109	4.26106	11.1806	3.7233	3.90411	3.53443	11.0342
ENSMUSG00000000948	22.7858	43.7487	46.5022	67.346	65.2688	54.3028	86.0045	67.7248	96.152	162.296	142.044	111.43	122.212	37.6789	62.3059	83.2937	134.496	43.7487	65.2688	86.0045	132.128
ENSMUSG00000000957	238.491	336.958	256.986	174.709	137.531	157.88	62.4416	98.0493	52.215	39.8085	37.9371	18.3532	11.2969	277.478	156.707	70.902	26.8489	256.986	157.88	62.4416	28.1452
ENSMUSG00000000958	34.9382	21.4089	19.5799	25.3767	25.6413	35.1963	50.6602	41.4435	50.3047	15.311	17.6452	19.6642	25.6748	25.309	28.7381	47.4695	19.5738	21.4089	25.6413	50.3047	18.6547
ENSMUSG00000000959	502.806	576.18	510.708	761.302	460.378	480.681	614.991	587.285	545.073	1012.06	810.795	534.866	563.819	529.898	567.454	582.45	730.384	510.708	480.681	587.285	687.307
ENSMUSG00000000976	160.26	161.963	186.825	207.894	283.22	243.357	248.588	282.018	265.532	263.349	269.089	197.953	187.94	169.683	244.824	265.38	229.582	161.963	243.357	265.532	230.651
ENSMUSG00000000982	1.51905	0.930824	1.63166	0	0	0	0	5.05409	0	4.59329	0	0	0	1.36051	0	1.6847	1.14832	1.51905	0	0	0
ENSMUSG00000000983	0	0	2.44748	0.976028	0	0	0	0	0	0	0	0	0	0.815828	0.325343	0	0	0	0	0	0
ENSMUSG00000001014	0	0	0	0	0	0	0	0	0	0	0	0	0	0	0	0	0	0	0	0	0
ENSMUSG00000001016	138.234	157.309	146.033	124.932	121.213	124.695	139.021	95.0169	154.098	68.8994	72.3451	77.3458	73.9434	147.192	123.614	129.379	73.1334	146.033	124.695	139.021	73.1443
ENSMUSG00000001017	500.528	543.601	563.737	298.665	326.344	363.024	305.139	298.191	371.236	254.162	297.321	298.895	324.53	535.955	329.344	324.855	293.727	543.601	326.344	305.139	298.108
ENSMUSG00000001018	211.908	208.505	206.404	180.565	122.379	130.729	294.536	259.78	275.721	58.1817	59.9935	69.4801	64.7005	208.939	144.558	276.679	63.089	208.505	130.729	275.721	62.347
ENSMUSG00000001020	3.79763	2.79247	4.89497	2.92809	0	2.01122	0	5.05409	2.54707	1.5311	0.882258	2.62189	2.05398	3.82836	1.64643	2.53372	1.77231	3.79763	2.01122	2.54707	1.79254
ENSMUSG00000001021	0	0	0	0	0	0	0	0	0	0	0	0	0	0	0	0	0	0	0	0	0
ENSMUSG00000001023	0	0	0	0	0	0	0	0	0	0	0	0	0	0	0	0	0	0	0	0	0
ENSMUSG00000001025	14.431	19.5473	13.0532	24.4007	8.1586	3.01682	17.6722	35.3786	8.91475	6.12439	35.2903	13.1095	12.3239	15.6772	11.8587	20.6552	16.712	14.431	8.1586	17.6722	12.7167
ENSMUSG00000001027	0	0.930824	0	2.92809	0	1.00561	0	0	0.636768	0	0	0	0	0.310275	1.31123	0.212256	0	0	1.00561	0	0
ENSMUSG00000001029	28.1025	16.7548	22.8432	11.7123	19.8137	9.05047	5.89072	13.1406	6.36768	59.7128	56.4645	14.4204	21.5668	22.5668	13.5255	8.46634	38.0411	22.8432	11.7123	6.36768	39.0157
ENSMUSG00000001034	26.5834	15.824	29.3698	25.3767	18.6482	19.1066	44.7695	53.5733	28.6546	44.4018	30.879	18.3532	22.5938	23.9257	21.0438	42.3325	29.057	26.5834	19.1066	44.7695	26.7364
ENSMUSG00000001036	95.7003	85.6358	75.0562	127.86	113.055	100.561	136.665	104.114	80.8695	82.6793	100.577	94.388	105.78	85.4641	113.825	107.216	95.8562	85.6358	113.055	104.114	97.4827
ENSMUSG00000001039	2.27858	2.79247	0.815828	8.78426	8.1586	3.01682	15.3159	15.1623	15.9192	12.2488	15.8806	14.4204	8.21594	1.96229	6.65323	15.4658	12.6914	2.27858	8.1586	15.3159	13.3346
ENSMUSG00000001052	266.594	220.605	261.065	241.079	259.91	241.346	160.228	301.224	236.878	252.631	231.152	191.398	199.236	249.421	247.445	232.776	218.604	261.065	241.346	236.878	215.194
ENSMUSG00000001053	52.4073	49.3337	37.5281	27.3288	23.3103	35.1963	37.7006	20.2164	19.103	6.12439	6.17581	2.62189	8.21594	46.423	28.6118	25.6733	5.78451	49.3337	27.3288	20.2164	6.1501
ENSMUSG00000001054	109.372	137.762	144.402	217.654	155.013	164.92	190.859	134.439	143.91	122.488	115.576	133.716	147.887	130.512	179.196	156.403	129.917	137.762	164.92	143.91	128.102
ENSMUSG00000001056	168.615	255.977	137.875	197.158	139.862	108.606	118.992	109.168	112.708	218.947	154.395	167.801	163.292	187.489	148.542	113.623	176.109	168.615	139.862	112.708	165.546
ENSMUSG00000001065	148.867	154.517	147.665	188.373	142.193	202.127	108.389	147.579	85.3269	223.54	194.979	195.331	153.022	150.35	177.564	113.765	191.718	148.867	188.373	108.389	195.155
ENSMUSG00000001076	1.51905	1.86165	0	8.78426	2.33103	11.0617	10.6033	3.03245	2.54707	0	0	1.31095	1.02699	1.1269	7.39232	5.39427	0.584484	1.51905	8.78426	3.03245	0.513496
ENSMUSG00000001082	43.293	55.8494	37.5281	46.8494	26.8068	36.2019	63.6198	63.6815	40.7532	73.4927	90.8726	49.8159	41.0797	45.5568	36.6194	56.0181	63.8152	43.293	36.2019	63.6198	61.6543
ENSMUSG00000001089	175.45	158.24	197.43	159.093	250.586	241.346	217.957	216.315	208.86	142.392	74.9919	123.229	219.776	177.04	217.008	214.377	140.097	175.45	241.346	216.315	132.81
ENSMUSG00000001095	10.6334	11.1699	13.0532	4.88014	8.1586	7.03926	8.247	4.04327	3.18384	0	0	0	2.05398	11.6188	6.69267	5.15804	0.513496	11.1699	7.03926	4.04327	0
ENSMUSG00000001098	82.0288	58.6419	85.6619	102.483	81.586	80.4486	136.665	135.45	82.1431	136.268	156.16	116.674	95.5103	75.4442	88.1725	118.086	126.153	82.0288	81.586	135.45	126.471
ENSMUSG00000001100	764.083	973.642	884.358	882.33	726.115	749.178	1056.79	741.94	845.628	1178.95	1290.74	972.721	881.159	874.027	785.874	881.454	1080.89	884.358	749.178	845.628	1075.83
ENSMUSG00000001103	9.11431	22.3398	10.6058	2.92809	9.32411	5.02804	10.6033	7.07572	10.8251	0	10.5871	6.55473	6.16195	14.0199	5.76008	9.50136	5.82594	10.6058	5.02804	10.6033	6.35834
ENSMUSG00000001105	306.089	400.254	319.805	224.487	233.103	240.34	401.747	354.797	365.505	591.004	582.29	618.766	632.627	342.049	232.643	374.016	606.172	319.805	233.103	365.505	604.885
ENSMUSG00000001119	88.8645	92.1516	67.7137	124.932	64.1033	60.3365	103.677	171.839	78.9592	59.7128	124.398	55.0597	60.5925	82.9099	83.1238	118.158	74.9409	88.8645	64.1033	103.677	60.1527
ENSMUSG00000001120	12.9119	6.51577	10.6058	7.80823	10.4896	9.05047	18.8503	5.05409	5.09414	15.311	7.05806	5.24378	4.10797	10.0112	9.11611	9.66618	7.9302	10.6058	9.05047	5.09414	6.15092
ENSMUSG00000001123	6522.81	8434.2	7776.47	5874.71	5708.69	5272.4	9025.76	16109.4	9490.39	4810.71	4944.17	3211.82	4999.4	7577.83	5618.6	11541.8	4491.52	7776.47	5708.69	9490.39	4877.44
ENSMUSG00000001127	590.152	748.382	708.955	1199.54	819.357	932.199	716.311	656.021	622.759	924.783	1054.3	850.803	784.622	682.496	983.698	665.03	903.627	708.955	932.199	656.021	887.793
ENSMUSG00000001128	123.803	82.8433	152.56	169.829	104.896	81.4542	91.8952	137.471	102.52	226.602	128.81	182.221	210.533	119.735	118.726	110.629	187.042	123.803	104.896	102.52	196.377
ENSMUSG00000001131	2.27858	0.930824	0.815828	0.976028	0	0	12.9596	12.1298	5.73091	4.59329	13.2339	5.24378	10.2699	1.34174	0.325343	10.2734	8.33522	0.930824	0	12.1298	7.75685
ENSMUSG00000001134	3.0381	0	1.63166	0.976028	2.33103	3.01682	0	0	3.18384	0	3.52903	10.4876	3.08098	1.55659	2.10796	1.06128	4.27439	1.63166	2.33103	0	3.305
ENSMUSG00000001138	246.846	223.398	217.01	221.558	182.986	241.346	354.621	258.769	255.981	148.516	169.394	140.271	109.888	229.085	215.297	289.79	142.017	223.398	221.558	258.769	144.394
ENSMUSG00000001143	169.374	157.309	170.508	130.788	191.144	214.194	187.325	118.266	215.864	108.708	69.6984	62.9254	78.0514	165.731	178.709	173.818	79.8458	169.374	191.144	187.325	73.8749
ENSMUSG00000001150	234.694	204.781	208.036	271.336	304.199	307.716	209.71	175.882	241.335	232.727	208.213	228.104	204.371	215.837	294.417	208.976	218.354	208.036	304.199	209.71	218.159
ENSMUSG00000001151	122.284	146.139	92.1886	145.428	170.165	147.824	68.3323	102.093	75.7754	105.646	130.574	119.296	121.185	120.204	154.473	82.0668	119.175	122.284	147.824	75.7754	120.241
ENSMUSG00000001155	5443.52	7358.16	6649.81	8187.9	6131.77	7833.69	4210.68	4689.18	3721.27	9388.69	12927.7	8653.55	7968.43	6483.83	7384.45	4207.05	9734.6	6649.81	7833.69	4210.68	9021.12
ENSMUSG00000001156	95.7003	80.0509	57.9238	108.339	75.7584	94.5271	101.32	88.952	80.2328	108.708	120.869	77.3458	78.0514	77.8916	92.8749	90.1684	96.2436	80.0509	94.5271	88.952	93.3797
ENSMUSG00000001157	118.486	142.416	150.928	87.8426	118.882	119.667	177.9	182.958	242.609	146.985	161.453	179.599	182.805	137.277	108.797	201.155	167.711	142.416	118.882	182.958	170.526
ENSMUSG00000001158	120.005	229.913	129.717	62.4658	68.7653	59.3309	108.389	107.147	58.5827	349.09	289.381	163.868	235.181	159.878	63.5207	91.3728	259.38	129.717	62.4658	107.147	262.281
ENSMUSG00000001166	9.11431	14.8932	9.78994	10.7363	11.6551	6.03365	0	1.01082	0	0	0	0	0	11.2658	9.47503	0.336939	0	9.78994	10.7363	0	0
ENSMUSG00000001168	0.759526	0	0	0	1.16551	2.01122	0	0	0	1.5311	1.76452	0	1.02699	0.253175	1.05891	0	1.08065	0	1.16551	0	1.27904
ENSMUSG00000001173	63.8002	48.4028	62.0029	71.2501	89.7446	93.5215	27.0973	33.357	43.937	70.4305	49.4064	60.3035	66.7545	58.0687	84.8387	34.7971	61.7237	62.0029	89.7446	33.357	63.529
ENSMUSG00000001175	2359.85	2213.5	2329.19	1541.15	2019.84	1815.12	2937.11	2483.58	2820.25	1869.47	2055.66	2205.01	2457.59	2300.85	1792.04	2746.98	2146.93	2329.19	1815.12	2820.25	2130.34
ENSMUSG00000001211	2545.17	2779.44	2631.05	2808.03	2396.3	2311.89	3242.25	2984.94	2737.47	3255.11	3546.68	2819.84	2400.08	2651.89	2505.41	2988.22	3005.43	2631.05	2396.3	2984.94	3037.48
ENSMUSG00000001225	0	0	0	0	1.16551	0	0	0	0	0	0	0	0	0	0.388505	0	0	0	0	0	0
ENSMUSG00000001227	54.6859	74.4659	24.4748	63.4418	48.9516	34.1907	111.924	71.7681	33.7487	36.7463	36.1726	28.8408	16.4319	51.2089	48.8614	72.4801	29.5479	54.6859	48.9516	71.7681	32.5067
ENSMUSG00000001228	4.55716	0.930824	4.07914	5.85617	3.49654	3.01682	11.7814	12.1298	8.91475	3.0622	3.52903	2.62189	5.13496	3.18904	4.12318	10.942	3.58702	4.07914	3.49654	11.7814	3.29561
ENSMUSG00000001229	540.023	465.412	465.022	411.884	435.902	450.512	858.867	677.248	531.701	489.951	532.884	397.216	518.631	490.152	432.766	689.272	484.671	465.412	435.902	677.248	504.291
ENSMUSG00000001240	9.87384	0	4.89497	11.7123	4.66206	3.01682	4.71257	16.1731	6.36768	7.65549	14.1161	17.0423	12.3239	4.92294	6.46374	9.08445	12.7845	4.89497	4.66206	6.36768	13.22
ENSMUSG00000001247	1083.84	1234.27	1068.73	1031.66	883.46	915.103	1214.67	1313.05	565.45	1999.61	2247.11	1575.76	1497.35	1128.95	943.408	1031.06	1829.96	1083.84	915.103	1214.67	1787.68
ENSMUSG00000001248	120.005	98.6673	110.137	206.918	122.379	155.869	172.009	115.233	87.2372	194.449	193.214	131.095	113.996	109.603	161.722	124.826	158.189	110.137	155.869	115.233	162.154
ENSMUSG00000001249	3642.69	4366.49	3214.36	5680.49	2994.21	3501.53	6053.3	4409.19	4344.03	3908.89	4546.28	4404.78	4055.59	3741.18	4058.74	4935.51	4228.88	3642.69	3501.53	4409.19	4230.18
ENSMUSG00000001260	0	0	0	0	0	0	23.5629	13.1406	14.6457	0	0	1.31095	0	0	0	17.1164	0.327736	0	0	14.6457	0
ENSMUSG00000001270	24.3048	21.4089	14.6849	20.4966	12.8207	6.03365	25.9192	22.238	24.834	13.7799	21.1742	2.62189	12.3239	20.1329	13.117	24.3304	12.475	21.4089	12.8207	24.834	13.0519
ENSMUSG00000001280	413.182	430.971	437.284	356.25	730.778	554.09	221.491	301.224	354.68	509.856	509.945	606.968	592.574	427.146	547.039	292.465	554.836	430.971	554.09	301.224	551.26
ENSMUSG00000001281	18.9881	5.58494	4.07914	36.113	15.1517	17.0953	0	9.09736	4.45738	9.18659	10.5871	30.1517	25.6748	9.55074	22.7867	4.51825	18.9001	5.58494	17.0953	4.45738	18.1309
ENSMUSG00000001285	117.727	148.932	119.927	179.589	122.379	121.679	255.657	185.99	220.959	104.115	94.4016	153.381	166.373	128.862	141.216	220.869	129.567	119.927	122.379	220.959	128.748
ENSMUSG00000001288	70.6359	114.491	79.9511	53.6816	50.1171	20.1122	93.0733	55.595	44.5738	97.9903	99.6951	74.7239	64.7005	88.3595	41.3036	64.414	84.2774	79.9511	50.1171	55.595	86.3571
ENSMUSG00000001289	113.169	178.718	132.98	107.363	71.0964	95.5328	156.693	157.688	180.842	215.885	282.323	183.532	158.157	141.623	91.3308	165.074	209.974	132.98	95.5328	157.688	199.709
ENSMUSG00000001300	22.7858	26.9939	34.2648	50.7535	72.2619	82.4599	40.0569	50.5409	33.7487	12.2488	32.6435	26.2189	22.5938	28.0148	68.4917	41.4488	23.4263	26.9939	72.2619	40.0569	24.4064
ENSMUSG00000001305	82.0288	69.8118	67.7137	80.0343	54.7792	54.3028	69.5105	72.7789	91.0578	113.301	115.576	127.162	123.239	73.1848	63.0388	77.7824	119.819	69.8118	54.7792	72.7789	119.407
ENSMUSG00000001313	155.703	181.511	140.322	207.894	178.324	189.054	136.665	141.514	247.066	3.0622	5.29355	10.4876	1.02699	159.179	191.757	175.082	4.96757	155.703	189.054	141.514	4.17787
ENSMUSG00000001323	770.159	822.848	903.122	302.569	489.516	378.109	94.2515	148.59	130.537	133.206	175.569	125.851	141.725	832.043	390.064	124.46	144.088	822.848	378.109	130.537	137.465
ENSMUSG00000001333	1.51905	0	0	2.92809	0	0	1.17814	2.02164	0	7.65549	10.5871	2.62189	6.16195	0.506351	0.976028	1.06659	6.75661	0	0	1.17814	6.90872
ENSMUSG00000001334	0.759526	10.2391	10.6058	7.80823	13.9862	7.03926	0	1.01082	0	0	0	0	2.05398	7.20145	9.61122	0.336939	0.513496	10.2391	7.80823	0	0
ENSMUSG00000001348	1126.38	1295.71	1178.87	453.853	558.281	421.35	1862.64	1351.46	1326.39	2524.78	2637.95	2286.29	2342.57	1200.32	477.828	1513.5	2447.9	1178.87	453.853	1351.46	2433.67
ENSMUSG00000001349	0.759526	0.930824	0.815828	6.8322	1.16551	2.01122	0	3.03245	1.27354	4.59329	102.342	2.62189	3.08098	0.835393	3.33631	1.43533	28.1595	0.815828	2.01122	1.27354	3.83713
ENSMUSG00000001366	559.771	551.048	600.449	775.943	637.536	710.965	986.106	852.119	1052.58	515.98	449.952	414.259	515.55	570.423	708.148	963.601	473.935	559.771	710.965	986.106	482.751
ENSMUSG00000001376	95.7003	108.906	101.979	81.0104	86.2481	100.561	106.033	73.7897	98.0623	99.5214	73.2274	123.229	134.536	102.195	89.2731	92.6283	107.628	101.979	86.2481	98.0623	111.375
ENSMUSG00000001379	150.386	129.385	132.98	227.415	155.013	169.948	408.816	389.165	309.469	206.698	255.855	292.341	170.481	137.584	184.125	369.15	231.344	132.98	169.948	389.165	231.276
ENSMUSG00000001380	273.429	310.895	305.12	266.456	257.579	251.402	236.807	185.99	251.523	277.129	287.616	323.803	331.718	296.481	258.479	224.774	305.067	305.12	257.579	236.807	305.71
ENSMUSG00000001383	480.02	643.199	432.389	398.22	312.358	363.024	267.439	294.148	461.657	391.961	458.774	486.361	403.608	518.536	357.867	341.081	435.176	480.02	363.024	294.148	431.191
ENSMUSG00000001403	3.0381	0.930824	2.44748	1.95206	6.99309	3.01682	0	2.02164	2.54707	114.832	106.753	43.2612	61.6195	2.1388	3.98732	1.5229	81.6166	2.44748	3.01682	2.02164	84.1864
ENSMUSG00000001415	368.37	400.254	318.173	436.285	363.64	440.456	388.787	425.554	352.133	347.559	352.021	306.761	303.99	362.266	413.46	388.825	327.583	368.37	436.285	388.787	327.16
ENSMUSG00000001416	758.007	672.055	803.591	647.107	727.281	759.234	692.748	653.999	767.306	526.698	606.111	744.617	780.514	744.551	711.207	704.684	664.485	758.007	727.281	692.748	675.364
ENSMUSG00000001417	72.155	57.7111	54.6605	40.0172	36.1309	34.1907	247.41	210.25	209.497	260.287	240.856	207.129	270.099	61.5088	36.7796	222.386	244.593	57.7111	36.1309	210.25	250.572
ENSMUSG00000001418	591.671	686.017	532.736	542.672	364.806	341.907	506.602	695.443	417.083	685.932	726.981	629.254	632.627	603.475	416.461	539.709	668.698	591.671	364.806	506.602	659.279
ENSMUSG00000001419	419.258	434.695	447.89	457.757	396.275	482.692	303.961	469.019	278.904	1140.67	874.318	477.184	542.252	433.948	445.575	350.628	758.605	434.695	457.757	303.961	708.285
ENSMUSG00000001420	8.35479	8.37741	4.89497	6.8322	10.4896	8.04486	9.42515	8.08654	5.73091	15.311	14.1161	7.86567	4.10797	7.20906	8.45556	7.74753	10.3502	8.35479	8.04486	8.08654	10.9909
ENSMUSG00000001424	669.142	565.01	586.58	621.73	547.792	548.056	524.274	512.485	461.657	497.607	523.179	492.915	422.094	606.911	572.526	499.472	483.949	586.58	548.056	512.485	495.261
ENSMUSG00000001435	6962.57	8522.62	6698.76	7467.59	4667.89	5040.11	9396.87	6117.47	6180.47	7710.61	8939.92	7052.88	5514.95	7394.65	5725.2	7231.6	7304.59	6962.57	5040.11	6180.47	7381.75
ENSMUSG00000001436	46.3311	40.0254	48.9497	17.5685	39.6275	57.3197	24.741	62.6707	57.9459	29.0909	34.4081	43.2612	42.1067	45.1021	38.1719	48.4525	37.2167	46.3311	39.6275	57.9459	38.2574
ENSMUSG00000001440	1222.08	1117.92	1324.9	1191.73	1836.85	1762.83	1194.64	1216.01	1592.56	845.166	846.968	1139.21	944.833	1221.63	1597.14	1334.4	944.044	1222.08	1762.83	1216.01	895.9
ENSMUSG00000001441	316.722	322.996	315.725	209.846	235.434	265.481	203.819	221.369	233.694	307.751	270.853	253.012	201.29	318.481	236.92	219.627	258.227	316.722	235.434	221.369	261.933
ENSMUSG00000001444	4.55716	1.86165	0.815828	0	0	0	0	3.03245	1.27354	6.12439	4.41129	10.4876	16.4319	2.41154	0	1.43533	9.36378	1.86165	0	1.27354	8.30598
ENSMUSG00000001445	521.794	524.985	523.762	568.049	483.688	490.737	738.696	584.253	576.912	1650.52	1371.03	972.721	983.859	523.514	514.158	633.287	1244.53	523.762	490.737	584.253	1177.44
ENSMUSG00000001467	2450.23	2601.65	2743.63	1138.05	2162.03	1574.78	3250.5	3004.15	3661.42	1586.22	1517.48	2488.17	2036.53	2598.5	1624.95	3305.35	1907.1	2601.65	1574.78	3250.5	1811.37
ENSMUSG00000001472	1233.47	1174.7	1076.89	1373.27	1130.55	1152.43	1522.16	1402	1412.35	1554.06	1649.82	1660.97	1453.19	1161.69	1218.75	1445.51	1579.51	1174.7	1152.43	1412.35	1601.94
ENSMUSG00000001473	81.2693	75.3967	58.7396	231.319	249.42	194.082	551.371	695.443	501.136	169.952	226.74	158.624	128.374	71.8019	224.94	582.65	170.923	75.3967	231.319	551.371	164.288
ENSMUSG00000001482	442.804	501.714	512.34	292.809	250.586	232.295	526.63	459.922	518.966	636.937	568.174	659.405	674.734	485.619	258.563	501.839	634.812	501.714	250.586	518.966	648.171
ENSMUSG00000001493	4.55716	0.930824	2.44748	0.976028	0	0	0	0	0	0	0	0	0	2.64515	0.325343	0	0	2.44748	0	0	0
ENSMUSG00000001494	1.51905	0	0.815828	0	0	1.00561	0	0	0	71.9616	67.0516	55.0597	54.4306	0.778293	0.335203	0	62.1259	0.815828	0	0	61.0556
ENSMUSG00000001496	0	0	0	0	0	0	1.17814	0	0	0	0	0	0	0	0	0.392715	0	0	0	0	0
ENSMUSG00000001497	2.27858	1.86165	4.89497	7.80823	6.99309	8.04486	0	5.05409	6.36768	0	0	0	0	3.01173	7.61539	3.80726	0	2.27858	7.80823	5.05409	0
ENSMUSG00000001504	0	0	0	0	0	0	0	0	0	0	0	0	0	0	0	0	0	0	0	0	0
ENSMUSG00000001506	77.4716	122.869	44.0547	139.572	27.9723	27.1514	166.118	384.111	109.524	42.8707	139.397	30.1517	32.8637	81.465	64.8986	219.918	61.3207	77.4716	27.9723	166.118	37.8672
ENSMUSG00000001507	107.093	132.177	94.6361	100.531	85.0825	97.544	134.308	107.147	118.439	87.2726	115.576	66.8582	62.6465	111.302	94.3858	119.965	83.0883	107.093	97.544	118.439	77.0654
ENSMUSG00000001508	0	0	0	0	0	0	0	0	0.636768	0	3.52903	1.31095	0	0	0	0.212256	1.20999	0	0	0	0.655473
ENSMUSG00000001510	0	0	0	0	0	0	0	0	0	0	0	0	0	0	0	0	0	0	0	0	0
ENSMUSG00000001517	7.59526	2.79247	8.97411	6.8322	6.99309	7.03926	17.6722	24.2596	22.9237	9.18659	5.29355	10.4876	14.3779	6.45395	6.95485	21.6185	9.8364	7.59526	6.99309	22.9237	9.83707
ENSMUSG00000001518	88.105	97.7365	115.848	83.9384	73.4274	65.3645	110.745	96.0277	105.703	143.923	181.745	173.045	154.049	100.563	74.2435	104.159	163.19	97.7365	73.4274	105.703	163.547
ENSMUSG00000001520	0.759526	3.7233	0	5.85617	8.1586	8.04486	7.06886	4.04327	0.636768	15.311	21.1742	20.9751	11.2969	1.49427	7.35321	3.9163	17.1893	0.759526	8.04486	4.04327	18.143
ENSMUSG00000001521	13.6715	18.6165	19.5799	13.6644	16.3172	10.0561	73.0449	45.4868	40.7532	9.18659	9.70484	11.7985	7.18895	17.2893	13.3459	53.0949	9.46972	18.6165	13.6644	45.4868	9.44571
ENSMUSG00000001524	127.6	124.73	130.532	134.692	76.9239	109.611	154.337	117.255	74.5019	108.708	122.634	127.162	139.671	127.621	107.076	115.365	124.544	127.6	109.611	117.255	124.898
ENSMUSG00000001525	1087.64	1202.62	1103	802.295	771.571	749.178	1303.03	1436.37	1407.89	1208.04	1283.69	891.443	1209.8	1131.09	774.348	1382.43	1148.24	1103	771.571	1407.89	1208.92
ENSMUSG00000001542	724.588	627.375	918.622	753.494	948.729	968.4	321.633	370.97	444.464	444.018	353.785	380.174	536.09	756.862	890.208	379.022	428.517	724.588	948.729	370.97	412.096
ENSMUSG00000001552	546.099	735.351	634.714	724.213	476.695	452.524	637.376	435.662	380.151	1817.41	1934.79	1230.98	1089.64	638.721	551.144	484.396	1518.21	634.714	476.695	435.662	1524.2
ENSMUSG00000001555	9.11431	17.6857	11.4216	24.4007	10.4896	4.02243	16.494	22.238	5.73091	1.5311	10.5871	1.31095	3.08098	12.7405	12.9709	14.821	4.12753	11.4216	10.4896	16.494	2.30604
ENSMUSG00000001558	0.759526	0	0.815828	5.85617	2.33103	3.01682	0	0	0	3.0622	1.76452	0	0	0.525118	3.73467	0	1.20668	0.759526	3.01682	0	0.882258
ENSMUSG00000001566	0	0	0	0	0	0	0	0	0	0	0	0	0	0	0	0	0	0	0	0	0
ENSMUSG00000001569	205.832	228.983	199.062	192.278	236.599	206.15	183.79	192.055	206.313	278.66	209.977	276.609	252.64	211.292	211.676	194.053	254.472	205.832	206.15	192.055	264.625
ENSMUSG00000001576	1203.85	1189.59	1180.5	1234.68	1055.96	985.496	1538.66	1404.03	1489.4	1348.9	1647.18	1208.69	1272.44	1191.31	1092.04	1477.36	1369.3	1189.59	1055.96	1489.4	1310.67
ENSMUSG00000001583	0	0.930824	0.815828	0	2.33103	0	0	1.01082	1.9103	6.12439	10.5871	2.62189	2.05398	0.582217	0.77701	0.973707	5.34684	0.815828	0	1.01082	4.37314
ENSMUSG00000001588	34.1787	15.824	19.5799	30.2569	15.1517	26.1458	28.2754	32.3462	31.8384	22.9665	9.70484	20.9751	20.5398	23.1942	23.8515	30.82	18.5466	19.5799	26.1458	31.8384	20.7575
ENSMUSG00000001604	420.777	551.048	455.232	194.23	178.324	156.875	761.081	337.613	397.343	448.612	492.3	517.823	437.499	475.686	176.476	498.679	474.058	455.232	178.324	397.343	470.456
ENSMUSG00000001622	0	0	0	0	0	0	0	0	0	0	0	0	0	0	0	0	0	0	0	0	0
ENSMUSG00000001627	11.3929	10.2391	16.3166	16.5925	16.3172	22.1234	67.1542	43.4652	31.8384	26.0287	14.1161	20.9751	14.3779	12.6495	18.3444	47.4859	18.8744	11.3929	16.5925	43.4652	17.6765
ENSMUSG00000001630	277.987	201.989	239.038	83.9384	129.372	131.735	190.859	245.629	378.24	27.5598	42.3484	56.3706	46.2146	239.671	115.015	271.576	43.1234	239.038	129.372	245.629	44.2815
ENSMUSG00000001632	133.677	110.768	132.98	245.959	191.144	215.2	161.406	150.612	128.627	203.636	165.864	145.515	119.131	125.808	217.435	146.882	158.537	132.98	215.2	150.612	155.69
ENSMUSG00000001642	6.07621	13.9624	5.7108	1.95206	0	1.00561	2.35629	16.1731	3.18384	3.0622	3.52903	1.31095	2.05398	8.58312	0.985888	7.23774	2.48904	6.07621	1.00561	3.18384	2.55809
ENSMUSG00000001655	0	0	0	0	0	0	0	0	0	0	0	0	0	0	0	0	0	0	0	0	0
ENSMUSG00000001656	0	0	0	0	0	0	0	0	0	0	0	0	0	0	0	0	0	0	0	0	0
ENSMUSG00000001657	0	0	0	0	0	0	0	0	0	0	0	0	0	0	0	0	0	0	0	0	0
ENSMUSG00000001661	0	1.86165	0	0	0	0	0	0	0	0	0	0	0	0.620549	0	0	0	0	0	0	0
ENSMUSG00000001663	3129.25	4219.42	3435.45	85.8905	333.337	48.2692	159.049	306.278	194.214	162.296	242.621	45.8831	145.833	3594.71	155.832	219.847	149.158	3435.45	85.8905	194.214	154.065
ENSMUSG00000001665	675.219	831.226	894.963	325.017	175.993	111.622	3539.14	2683.72	4170.83	563.444	428.777	66.8582	284.477	800.469	204.211	3464.56	335.889	831.226	175.993	3539.14	356.627
ENSMUSG00000001666	2277.82	4000.68	2826.84	1250.29	855.488	689.847	962.543	1374.71	1511.69	3561.33	3560.79	2342.66	2605.48	3035.11	931.876	1282.98	3017.57	2826.84	855.488	1374.71	3083.14
ENSMUSG00000001670	10765.5	13390.8	15316.4	6402.75	10762.4	11989.9	11726.1	8341.27	10220.1	15813.2	11079.4	11751.3	11371.9	13157.6	9718.32	10095.8	12503.9	13390.8	10762.4	10220.1	11561.6
ENSMUSG00000001672	0.759526	2.79247	0.815828	0.976028	3.49654	1.00561	24.741	9.09736	4.45738	42.8707	43.2306	65.5473	50.3226	1.45594	1.82606	12.7652	50.4928	0.815828	1.00561	9.09736	46.7766
ENSMUSG00000001674	54.6859	80.0509	53.8447	38.0651	40.793	40.2243	16.494	29.3137	29.2913	53.5884	43.2306	41.9502	43.1337	62.8605	39.6941	25.033	45.4757	54.6859	40.2243	29.2913	43.1822
ENSMUSG00000001687	606.102	500.783	591.475	514.367	477.861	492.748	928.377	549.885	569.907	684.401	557.587	703.977	759.974	566.12	494.992	682.723	676.485	591.475	492.748	569.907	694.189
ENSMUSG00000001700	570.404	438.418	528.657	405.052	438.233	400.232	513.671	339.635	571.181	349.09	409.368	385.418	440.58	512.493	414.506	474.829	396.114	528.657	405.052	513.671	397.393
ENSMUSG00000001707	88.8645	68.881	97.8994	88.8186	104.896	124.695	51.8383	86.9303	61.7665	96.4592	81.1677	72.102	64.7005	85.215	106.137	66.845	78.6073	88.8645	104.896	61.7665	76.6349
ENSMUSG00000001729	342.546	413.286	357.333	676.388	419.585	379.114	758.724	582.231	496.042	597.128	651.989	574.194	506.307	371.055	491.696	612.333	582.404	357.333	419.585	582.231	585.661
ENSMUSG00000001739	1.51905	7.44659	4.07914	10.7363	13.9862	2.01122	12.9596	3.03245	0	10.7177	23.821	13.1095	2.05398	4.34826	8.91123	5.33068	12.4255	4.07914	10.7363	3.03245	11.9136
ENSMUSG00000001741	24.3048	23.2706	20.3957	20.4966	23.3103	13.0729	22.3847	20.2164	12.7354	12.2488	11.4694	14.4204	17.4589	22.657	18.9599	18.4455	13.8993	23.2706	20.4966	20.2164	13.3346
ENSMUSG00000001750	310.646	404.908	350.806	391.387	275.061	276.542	508.958	397.251	394.796	378.181	355.55	212.373	272.153	355.454	314.33	433.669	304.564	350.806	276.542	397.251	313.851
ENSMUSG00000001751	294.696	397.462	294.514	290.856	206.296	187.043	567.865	239.564	224.142	499.138	548.764	418.191	379.987	328.891	228.065	343.857	461.52	294.696	206.296	239.564	458.665
ENSMUSG00000001755	1674.75	1634.53	1386.09	1467.95	1005.84	1052.87	1841.44	1311.03	1241.06	926.314	981.071	878.333	941.752	1565.12	1175.55	1464.51	931.867	1634.53	1052.87	1311.03	934.033
ENSMUSG00000001761	54.6859	43.7487	46.5022	38.0651	37.2965	34.1907	0	4.04327	1.9103	6.12439	7.05806	1.31095	6.16195	48.3123	36.5174	1.98452	5.16384	46.5022	37.2965	1.9103	6.14317
ENSMUSG00000001763	111.65	147.07	101.163	232.295	266.903	305.705	232.094	240.575	265.532	41.3396	68.8161	76.0348	35.9447	119.961	268.301	246.067	55.5338	111.65	266.903	240.575	55.0779
ENSMUSG00000001767	115.448	88.4283	116.663	104.435	131.703	101.566	162.584	144.547	142.636	71.9616	64.4048	112.741	116.05	106.847	112.568	149.922	91.2895	115.448	104.435	144.547	92.3514
ENSMUSG00000001768	147.348	144.278	139.507	126.884	155.013	174.976	169.653	147.579	182.116	67.3683	52.0532	69.4801	82.1594	143.711	152.291	166.449	67.7652	144.278	155.013	169.653	68.4242
ENSMUSG00000001773	0	0	0.815828	0	0	0	0	0	0	0	0	0	0	0.271943	0	0	0	0	0	0	0
ENSMUSG00000001774	270.391	264.354	293.698	120.051	283.22	360.008	279.22	178.915	227.326	165.359	194.979	208.44	182.805	276.148	254.426	228.487	187.896	270.391	283.22	227.326	188.892
ENSMUSG00000001783	577.999	564.079	559.658	629.538	561.778	589.286	642.088	691.399	680.068	711.96	837.263	867.846	857.538	567.246	593.534	671.185	818.652	564.079	589.286	680.068	847.401
ENSMUSG00000001785	116.967	117.284	150.112	127.86	107.227	121.679	180.256	143.536	240.698	125.55	142.926	145.515	136.59	128.121	118.922	188.163	137.645	117.284	121.679	180.256	139.758
ENSMUSG00000001786	230.896	248.53	269.223	183.493	203.965	234.307	229.738	276.964	266.806	280.191	337.023	280.542	247.505	249.55	207.255	257.836	286.315	248.53	203.965	266.806	280.367
ENSMUSG00000001794	1212.96	1315.25	1105.45	910.634	765.743	725.043	1147.51	1166.48	1258.25	3806.31	3634.02	1760.6	1590.81	1211.22	800.474	1190.75	2697.93	1212.96	765.743	1166.48	2697.31
ENSMUSG00000001802	197.477	178.718	168.876	469.47	269.234	355.985	836.482	587.285	421.54	163.827	226.74	178.289	141.725	181.69	364.896	615.102	177.645	178.718	355.985	587.285	171.058
ENSMUSG00000001804	0	0	0	0	0	0	0	0	0	0	0	0	2.05398	0	0	0	0.513496	0	0	0	0
ENSMUSG00000001815	0	0	0	0	0	0	0	0	0	0	0	0	0	0	0	0	0	0	0	0	0
ENSMUSG00000001819	0	0	0	0	0	0	0	0	0	0	0	0	0	0	0	0	0	0	0	0	0
ENSMUSG00000001823	0	0	0	0	0	0	0	0	0	0	0	0	0	0	0	0	0	0	0	0	0
ENSMUSG00000001827	0	0.930824	0	0	0	0	0	0	0	0	0.882258	1.31095	0	0.310275	0	0	0.548301	0	0	0	0.441129
ENSMUSG00000001829	353.939	339.751	335.305	488.014	390.447	438.445	453.585	433.641	422.814	416.459	457.892	474.562	471.389	342.998	438.969	436.68	455.075	339.751	438.445	433.641	464.641
ENSMUSG00000001833	574.202	481.236	522.13	226.439	360.144	346.935	406.46	304.256	403.711	177.607	159.689	245.147	346.096	525.856	311.172	371.476	232.135	522.13	346.935	403.711	211.377
ENSMUSG00000001844	189.122	249.461	187.64	372.843	247.089	269.503	246.232	179.926	252.797	199.043	211.742	228.104	202.317	208.741	296.478	226.318	210.302	189.122	269.503	246.232	207.03
ENSMUSG00000001847	1442.34	1460.46	1542.73	1309.83	1111.9	1218.8	1143.98	930.963	1282.45	1217.22	1161.93	1128.72	1187.2	1481.84	1213.51	1119.13	1173.77	1460.46	1218.8	1143.98	1174.57
ENSMUSG00000001855	130.638	126.592	127.269	186.421	163.172	157.88	160.228	193.066	122.896	298.564	217.918	161.246	151.995	128.167	169.158	158.73	207.431	127.269	163.172	160.228	189.582
ENSMUSG00000001864	2.27858	0	0.815828	2.92809	3.49654	3.01682	29.4536	27.2921	9.55152	243.445	211.742	243.836	209.506	1.03147	3.14715	22.0991	227.132	0.815828	3.01682	27.2921	227.593
ENSMUSG00000001865	0	0	0	0	0	0	0	0	0	0	0	0	0	0	0	0	0	0	0	0	0
ENSMUSG00000001870	26.5834	41.8871	27.7382	119.075	74.5929	65.3645	11.7814	45.4868	45.2105	99.5214	148.219	91.7662	67.7815	32.0695	86.3443	34.1596	101.822	27.7382	74.5929	45.2105	95.6438
ENSMUSG00000001891	4302.71	3963.45	5015.71	1896.42	2080.44	1983.06	3813.65	2144.96	3281.27	2191	2051.25	2477.69	2454.51	4427.29	1986.64	3079.96	2293.61	4302.71	1983.06	3281.27	2322.76
ENSMUSG00000001901	0	0	0	0	0	0	0	0	0	3.0622	0.882258	1.31095	0	0	0	0	1.31385	0	0	0	1.0966
ENSMUSG00000001909	250.644	306.241	241.485	342.586	208.627	231.29	196.75	181.947	243.245	321.531	411.132	315.938	284.477	266.123	260.834	207.314	333.269	250.644	231.29	196.75	318.734
ENSMUSG00000001910	346.344	463.55	420.151	477.278	385.785	444.479	603.209	437.684	438.096	667.559	494.947	313.316	309.125	410.015	435.847	492.997	446.236	420.151	444.479	438.096	404.131
ENSMUSG00000001911	227.858	389.084	313.278	592.449	318.185	327.828	629.129	297.18	308.833	835.979	498.476	232.037	232.1	310.073	412.821	411.714	449.648	313.278	327.828	308.833	365.288
ENSMUSG00000001918	20.5072	24.2014	22.0274	22.4487	6.99309	14.0785	12.9596	18.1947	11.4618	10.7177	6.17581	5.24378	5.13496	22.2453	14.5068	14.2054	6.81806	22.0274	14.0785	12.9596	5.70979
ENSMUSG00000001924	1774.25	1804.87	1934.33	2141.41	2005.85	1838.25	1998.13	1531.39	2126.17	1627.56	1467.19	1348.96	1301.2	1837.82	1995.17	1885.23	1436.23	1804.87	2005.85	1998.13	1408.08
ENSMUSG00000001930	94.1812	51.1953	80.767	153.236	79.255	104.583	60.0853	99.0601	88.5108	104.115	140.279	64.2363	53.4036	75.3812	112.358	82.5521	90.5084	80.767	104.583	88.5108	84.1755
ENSMUSG00000001942	364.572	325.788	344.279	257.671	312.358	305.705	377.006	459.922	417.083	179.138	148.219	186.154	183.832	344.88	291.911	418.004	174.336	344.279	305.705	417.083	181.485
ENSMUSG00000001943	6.83573	6.51577	8.15828	4.88014	4.66206	6.03365	0	5.05409	1.27354	4.59329	3.52903	7.86567	3.08098	7.16993	5.19195	2.10921	4.76724	6.83573	4.88014	1.27354	4.06116
ENSMUSG00000001946	89.6241	106.114	101.979	113.219	87.4136	77.4318	134.308	127.363	105.703	165.359	232.034	97.0099	162.265	99.2388	92.6882	122.458	164.167	101.979	87.4136	127.363	163.812
ENSMUSG00000001948	4.55716	7.44659	3.26331	0	0	0	0	7.07572	7.64122	9.18659	9.70484	6.55473	5.13496	5.08902	0	4.90565	7.64528	4.55716	0	7.07572	7.87066
ENSMUSG00000001962	107.093	125.661	123.19	134.692	120.048	95.5328	183.79	116.244	179.569	84.2104	122.634	99.6318	77.0244	118.648	116.758	159.868	95.8751	123.19	120.048	179.569	91.9211
ENSMUSG00000001964	44.812	66.0885	51.3972	45.8733	31.4689	42.2355	78.9356	65.7031	36.9325	52.0573	74.1097	61.6144	55.4576	54.0992	39.8593	60.5238	60.8097	51.3972	42.2355	65.7031	58.536
ENSMUSG00000001983	162.539	152.655	132.98	133.716	148.02	137.768	124.883	102.093	101.246	165.359	142.044	169.112	160.211	149.391	139.835	109.407	159.181	152.655	137.768	102.093	162.785
ENSMUSG00000001985	0	0	0.815828	1.95206	2.33103	1.00561	14.1377	1.01082	1.27354	1.5311	0	0	1.02699	0.271943	1.7629	5.47403	0.639522	0	1.95206	1.27354	0.513496
ENSMUSG00000001986	9.87384	12.1007	5.7108	8.78426	9.32411	14.0785	40.0569	75.8113	44.5738	0	0.882258	0	0	9.22845	10.729	53.4807	0.220564	9.87384	9.32411	44.5738	0
ENSMUSG00000001988	0	0	1.63166	1.95206	1.16551	4.02243	18.8503	3.03245	1.9103	0	0	0	1.02699	0.543885	2.38	7.93102	0.256748	0	1.95206	3.03245	0
ENSMUSG00000001995	43.293	39.0946	45.6864	113.219	93.2411	70.3926	32.988	42.4543	28.0178	15.311	9.70484	7.86567	8.21594	42.6913	92.2843	34.4867	10.2744	43.293	93.2411	32.988	8.96039
ENSMUSG00000001998	45.5716	27.9247	51.3972	35.137	78.0895	55.3084	28.2754	44.476	37.5693	44.4018	39.7016	48.505	67.7815	41.6311	56.1783	36.7736	50.0975	45.5716	55.3084	37.5693	46.4534
ENSMUSG00000001999	97.9788	87.4974	105.242	78.0823	62.9378	77.4318	190.859	124.331	108.251	30.622	22.9387	11.7985	31.8368	96.906	72.8173	141.147	24.299	97.9788	77.4318	124.331	26.7803
ENSMUSG00000002006	0	2.79247	4.07914	9.76028	10.4896	12.0673	1.17814	7.07572	3.18384	10.7177	16.7629	13.1095	15.4049	2.29054	10.7724	3.81257	13.9987	2.79247	10.4896	3.18384	14.2572
ENSMUSG00000002007	6.07621	3.7233	0.815828	5.85617	6.99309	3.01682	4.71257	5.05409	3.82061	6.12439	11.4694	6.55473	0	3.53844	5.28869	4.52909	6.03712	3.7233	5.85617	4.71257	6.33956
ENSMUSG00000002010	629.647	795.854	713.034	1042.4	726.115	773.313	513.671	815.73	785.772	1341.24	1608.36	828.517	901.699	712.845	847.275	705.057	1169.95	713.034	773.313	785.772	1121.47
ENSMUSG00000002012	1.51905	3.7233	0	0	0	2.01122	0	0	0	0	7.05806	1.31095	0	1.74745	0.670405	0	2.09225	1.51905	0	0	0.655473
ENSMUSG00000002014	739.019	1368.31	1232.72	509.487	547.792	525.933	493.642	1161.43	503.684	1933.78	2247.99	1595.42	1563.08	1113.35	527.737	719.585	1835.07	1232.72	525.933	503.684	1764.6
ENSMUSG00000002015	1146.12	1455.81	1320.01	1146.83	975.536	917.114	1341.91	1067.42	1462.02	963.06	1259.86	1356.83	1287.85	1307.31	1013.16	1290.45	1216.9	1320.01	975.536	1341.91	1273.86
ENSMUSG00000002017	365.332	340.682	342.648	407.98	458.047	499.787	507.78	495.301	702.355	313.875	275.264	370.997	328.637	349.554	455.271	568.479	322.194	342.648	458.047	507.78	321.256
ENSMUSG00000002020	13.6715	11.1699	13.8691	17.5685	6.99309	5.02804	9.42515	21.2272	5.73091	62.775	57.3468	41.9502	39.0257	12.9035	9.86321	12.1277	50.2744	13.6715	6.99309	9.42515	49.6485
ENSMUSG00000002028	219.503	170.341	209.668	222.534	472.033	450.512	108.389	272.921	150.277	362.87	318.495	288.408	292.693	199.837	381.693	177.196	315.616	209.668	450.512	150.277	305.594
ENSMUSG00000002031	271.91	364.883	295.33	207.894	158.51	152.852	216.778	320.429	282.725	587.942	592.877	386.729	438.526	310.708	173.085	273.311	501.518	295.33	158.51	282.725	513.234
ENSMUSG00000002032	581.037	526.846	690.191	761.302	716.791	808.509	345.196	352.775	359.137	197.512	145.573	116.674	182.805	599.358	762.201	352.37	160.641	581.037	761.302	352.775	164.189
ENSMUSG00000002033	9.11431	1.86165	3.26331	1.95206	1.16551	1.00561	0	5.05409	1.27354	4.59329	3.52903	13.1095	18.4859	4.74642	1.37439	2.10921	9.92941	3.26331	1.16551	1.27354	8.85137
ENSMUSG00000002043	110.891	116.353	61.1871	158.117	83.917	82.4599	207.353	225.412	89.1475	396.554	464.068	389.351	364.582	96.1436	108.164	173.971	403.639	110.891	83.917	207.353	392.952
ENSMUSG00000002052	495.211	559.425	467.469	662.723	782.06	848.733	501.889	838.979	542.526	721.147	731.392	562.395	505.28	507.369	764.506	627.798	630.054	495.211	782.06	542.526	641.771
ENSMUSG00000002055	6.07621	2.79247	9.78994	6.8322	12.8207	10.0561	0	15.1623	11.4618	1.5311	0.882258	3.93284	4.10797	6.21954	9.90298	8.8747	2.61354	6.07621	10.0561	11.4618	2.73197
ENSMUSG00000002057	0	0	0	0	0	0	0	0	0	0	0	0	0	0	0	0	0	0	0	0	0
ENSMUSG00000002058	137.474	68.881	69.3454	73.2021	72.2619	56.314	1125.13	725.767	881.287	156.172	186.156	196.642	215.668	91.9002	67.2594	910.727	188.66	69.3454	72.2619	881.287	191.399
ENSMUSG00000002059	55.4454	43.7487	37.5281	9.76028	11.6551	5.02804	32.988	34.3678	38.2061	30.622	29.9968	20.9751	25.6748	45.5741	8.81449	35.1873	26.8172	43.7487	9.76028	34.3678	27.8358
ENSMUSG00000002064	330.394	345.336	327.963	429.452	369.468	377.103	327.524	566.058	473.119	542.009	707.571	692.179	723.002	334.564	392.008	455.567	666.19	330.394	377.103	473.119	699.875
ENSMUSG00000002068	8.35479	5.58494	4.89497	18.5445	5.82757	3.01682	45.9476	8.08654	36.9325	6.12439	1.76452	2.62189	3.08098	6.27823	9.12964	30.3222	3.39794	5.58494	5.82757	36.9325	2.85143
ENSMUSG00000002076	4.55716	4.65412	6.52662	30.2569	45.4551	31.1738	221.491	121.298	152.824	6.12439	11.4694	14.4204	14.3779	5.24597	35.6286	165.204	11.598	4.65412	31.1738	152.824	12.9236
ENSMUSG00000002083	107.093	190.819	67.7137	65.3939	64.1033	48.2692	53.0165	48.5192	19.7398	133.206	164.982	149.448	157.13	121.875	59.2555	40.4252	151.191	107.093	64.1033	48.5192	153.289
ENSMUSG00000002100	1.51905	0	0	2.92809	2.33103	2.01122	0	0	0	0	2.64677	0	2.05398	0.506351	2.42344	0	1.17519	0	2.33103	0	1.02699
ENSMUSG00000002102	742.057	775.376	689.375	804.247	594.412	606.382	719.846	536.744	563.54	1051.86	1074.59	1081.53	1057.8	735.603	668.347	606.71	1066.45	742.057	606.382	563.54	1066.2
ENSMUSG00000002103	493.692	556.633	570.264	909.658	885.791	933.204	708.064	726.778	766.032	1185.07	1156.64	1035.65	1197.47	540.196	909.551	733.625	1143.71	556.633	909.658	726.778	1170.85
ENSMUSG00000002104	0	0.930824	0.815828	0.976028	1.16551	0	0	1.01082	0.636768	1.5311	0	0	0	0.582217	0.713848	0.549195	0.382774	0.815828	0.976028	0.636768	0
ENSMUSG00000002105	89.6241	130.315	84.0303	193.254	99.0687	122.684	124.883	101.082	103.156	381.243	290.263	178.289	136.59	101.323	138.336	109.707	246.596	89.6241	122.684	103.156	234.276
ENSMUSG00000002107	142.031	113.561	146.849	75.1542	142.193	113.634	87.1826	87.9411	98.699	136.268	116.458	161.246	133.509	134.147	110.327	91.2743	136.87	142.031	113.634	87.9411	134.888
ENSMUSG00000002108	1137.01	1233.34	1084.24	1767.59	1357.82	1516.46	1420.84	1005.76	1348.67	947.75	922.842	925.527	861.646	1151.53	1547.29	1258.43	914.441	1137.01	1516.46	1348.67	924.184
ENSMUSG00000002109	28.862	19.5473	27.7382	26.3528	31.4689	32.1795	32.988	51.5517	18.4663	13.7799	19.4097	15.7313	6.16195	25.3825	30.0004	34.3353	13.7707	27.7382	31.4689	32.988	14.7556
ENSMUSG00000002111	15.1905	6.51577	12.2374	9.76028	11.6551	5.02804	8.247	18.1947	10.8251	9.18659	16.7629	18.3532	12.3239	11.3146	8.81449	12.4223	14.1567	12.2374	9.76028	10.8251	14.5434
ENSMUSG00000002129	208.87	269.939	269.223	296.713	205.131	224.251	200.284	285.051	268.716	419.521	389.958	275.298	232.1	249.344	242.031	251.35	329.219	269.223	224.251	268.716	332.628
ENSMUSG00000002147	635.723	690.671	667.347	847.193	696.978	862.812	611.456	483.171	536.159	618.563	631.697	508.647	518.631	664.581	802.327	543.595	569.384	667.347	847.193	536.159	568.597
ENSMUSG00000002190	0	0	0	0	0	0	55.3727	26.2813	26.1075	0	0	0	1.02699	0	0	35.9205	0.256748	0	0	26.2813	0
ENSMUSG00000002204	6.83573	5.58494	3.26331	2.92809	3.49654	1.00561	9.42515	4.04327	4.45738	9.18659	8.82258	11.7985	7.18895	5.228	2.47675	5.97527	9.24915	5.58494	2.92809	4.45738	9.00458
ENSMUSG00000002205	240.01	203.85	217.826	228.391	170.165	169.948	322.811	212.272	269.353	333.779	431.424	315.938	300.909	220.562	189.501	268.145	345.512	217.826	170.165	269.353	324.859
ENSMUSG00000002210	81.2693	128.454	99.531	93.6987	54.7792	61.3421	58.9072	95.0169	71.318	154.641	167.629	127.162	105.78	103.085	69.94	75.0807	138.803	99.531	61.3421	71.318	140.901
ENSMUSG00000002221	193.679	220.605	208.036	237.175	243.593	258.441	161.406	236.531	181.479	189.856	156.16	135.027	127.347	207.44	246.403	193.139	152.098	208.036	243.593	181.479	145.593
ENSMUSG00000002222	2261.11	1638.25	1967.78	1864.21	2248.28	2376.25	1288.89	1473.77	1940.23	972.247	1219.28	1426.31	1508.65	1955.71	2162.91	1567.63	1281.62	1967.78	2248.28	1473.77	1322.79
ENSMUSG00000002227	203.553	275.524	223.537	328.922	174.827	170.953	593.784	461.944	373.146	883.443	941.369	524.378	461.119	234.205	224.901	476.291	702.578	223.537	174.827	461.944	703.911
ENSMUSG00000002228	4.55716	0	2.44748	1.95206	1.16551	5.02804	2.35629	4.04327	3.18384	3.0622	6.17581	2.62189	2.05398	2.33488	2.7152	3.19447	3.47847	2.44748	1.95206	3.18384	2.84204
ENSMUSG00000002233	89.6241	153.586	104.426	232.295	199.303	214.194	282.754	348.732	94.2417	1577.03	2414.74	1924.47	1749.99	115.879	215.264	241.909	1916.56	104.426	214.194	282.754	1837.23
ENSMUSG00000002240	0	0	0	0	0	0	0	0	0	0	0	0	0	0	0	0	0	0	0	0	0
ENSMUSG00000002249	104.055	127.523	128.901	145.428	78.0895	100.561	129.596	153.644	102.52	199.043	219.682	79.9676	83.1864	120.16	108.026	128.587	145.47	127.523	100.561	129.596	141.115
ENSMUSG00000002250	70.6359	97.7365	80.767	124.932	137.531	101.566	98.9641	275.953	59.2194	131.674	89.108	68.1691	198.209	83.0465	121.343	144.712	121.79	80.767	124.932	98.9641	110.391
ENSMUSG00000002257	0.759526	0.930824	0.815828	5.85617	1.16551	1.00561	4.71257	7.07572	1.27354	15.311	5.29355	7.86567	7.18895	0.835393	2.67576	4.35394	8.91479	0.815828	1.16551	4.71257	7.52731
ENSMUSG00000002265	67.5978	35.3713	44.8705	44.8973	89.7446	119.667	2.35629	23.2488	14.0089	12.2488	16.7629	9.17662	10.2699	49.2799	84.7698	13.2047	12.1146	44.8705	89.7446	14.0089	11.2594
ENSMUSG00000002266	0	0	0	0	0	0	0	0	0	0	0	0	0	0	0	0	0	0	0	0	0
ENSMUSG00000002274	4.55716	2.79247	0.815828	5.85617	0	1.00561	0	12.1298	3.82061	0	0.882258	9.17662	3.08098	2.72182	2.28726	5.31681	3.28496	2.79247	1.00561	3.82061	1.98162
ENSMUSG00000002279	509.642	549.186	478.891	820.84	541.964	612.415	1337.19	964.32	995.268	718.085	803.737	605.657	529.928	512.573	658.406	1098.93	664.352	509.642	612.415	995.268	661.871
ENSMUSG00000002280	217.224	250.392	194.167	309.401	216.786	216.206	233.272	256.748	196.125	293.971	295.556	279.231	306.044	220.594	247.464	228.715	293.701	217.224	216.786	233.272	294.764
ENSMUSG00000002289	1114.98	450.519	514.788	499.727	413.758	1041.81	944.871	617.61	328.572	229.665	857.555	654.162	682.95	693.43	651.765	630.351	606.083	514.788	499.727	617.61	668.556
ENSMUSG00000002297	40.2549	21.4089	24.4748	9.76028	9.32411	14.0785	32.988	9.09736	19.7398	55.1195	40.5839	43.2612	80.1054	28.7129	11.0543	20.6084	54.7675	24.4748	9.76028	19.7398	49.1904
ENSMUSG00000002307	135.955	156.378	126.453	150.308	114.22	91.5103	136.665	170.828	96.7887	208.229	222.329	125.851	119.131	139.596	118.68	134.761	168.885	135.955	114.22	136.665	167.04
ENSMUSG00000002308	34.9382	44.6795	42.4231	49.7774	25.6413	37.2075	35.3443	15.1623	37.5693	30.622	32.6435	44.5721	32.8637	40.6803	37.5421	29.3586	35.1753	42.4231	37.2075	35.3443	32.7536
ENSMUSG00000002319	229.377	256.907	256.17	420.668	391.613	365.036	448.873	324.472	333.666	401.148	446.423	444.41	420.04	247.485	392.439	369.004	428.005	256.17	391.613	333.666	432.225
ENSMUSG00000002320	393.434	359.298	313.278	434.333	389.282	398.221	586.715	574.144	540.616	231.196	384.664	367.065	419.013	355.337	407.278	567.159	350.484	359.298	398.221	574.144	375.865
ENSMUSG00000002324	48.6097	21.4089	28.554	0	5.82757	2.01122	0	1.01082	0.636768	3.0622	2.64677	5.24378	0	32.8575	2.61293	0.549195	2.73819	28.554	2.01122	0.636768	2.85448
ENSMUSG00000002325	337.989	332.304	347.543	164.949	203.965	190.06	512.492	377.035	490.311	604.784	498.476	343.468	516.577	339.279	186.325	459.946	490.826	337.989	190.06	490.311	507.526
ENSMUSG00000002326	140.512	128.454	142.77	140.548	144.524	147.824	214.422	251.694	254.707	238.851	270.853	194.02	223.884	137.245	144.299	240.274	231.902	140.512	144.524	251.694	231.368
ENSMUSG00000002329	154.184	239.222	205.589	119.075	110.724	121.679	148.446	209.239	158.555	130.143	153.513	135.027	156.103	199.665	117.159	172.08	143.697	205.589	119.075	158.555	144.27
ENSMUSG00000002332	1211.44	1385.07	1304.51	1197.59	1038.47	966.389	1592.85	1887.2	1334.67	626.219	708.453	582.06	543.279	1300.34	1067.48	1604.9	615.003	1304.51	1038.47	1592.85	604.139
ENSMUSG00000002341	0	0	0	0	0	0	0	0	0	0	0	0	0	0	0	0	0	0	0	0	0
ENSMUSG00000002342	187.603	247.599	176.219	401.148	315.854	355.985	212.066	276.964	237.514	218.947	246.15	205.818	220.803	203.807	357.662	242.181	222.93	187.603	355.985	237.514	219.875
ENSMUSG00000002343	41.0144	36.3021	37.5281	37.0891	31.4689	38.2131	74.223	53.5733	57.9459	42.8707	55.5822	79.9676	75.9974	38.2815	35.5904	61.9141	63.6045	37.5281	37.0891	57.9459	65.7898
ENSMUSG00000002345	0	2.79247	0	2.92809	2.33103	0	0	1.01082	1.27354	10.7177	2.64677	9.17662	3.08098	0.930824	1.75304	0.761451	6.40551	0	2.33103	1.01082	6.1288
ENSMUSG00000002346	1326.13	1358.07	1151.13	1791.01	1142.2	1365.62	1103.92	970.385	916.946	1587.75	2024.78	1331.92	1370.01	1278.45	1432.94	997.084	1578.61	1326.13	1365.62	970.385	1478.88
ENSMUSG00000002365	73.674	79.12	83.2145	262.552	243.593	235.312	202.641	182.958	191.03	293.971	253.208	294.963	277.288	78.6695	247.152	192.21	279.857	79.12	243.593	191.03	285.629
ENSMUSG00000002372	309.127	330.442	244.748	393.339	242.427	266.486	359.334	375.013	298.007	324.593	459.656	363.132	318.368	294.773	300.751	344.118	366.437	309.127	266.486	359.334	343.862
ENSMUSG00000002379	271.91	355.575	279.829	192.278	184.151	137.768	335.771	594.361	285.272	1829.66	1555.42	1026.47	1112.23	302.438	171.399	405.135	1380.95	279.829	184.151	335.771	1333.83
ENSMUSG00000002384	1.51905	0	0	1.95206	3.49654	3.01682	0	2.02164	0	0	0	1.31095	3.08098	0.506351	2.82181	0.673878	1.09798	0	3.01682	0	0.655473
ENSMUSG00000002393	527.871	703.703	537.631	543.648	427.744	441.462	1685.92	703.529	609.387	470.047	419.073	483.739	479.605	589.735	470.951	999.613	463.116	537.631	441.462	703.529	474.826
ENSMUSG00000002395	192.16	317.411	216.194	313.305	201.634	199.11	249.766	272.921	161.102	393.492	348.492	355.266	329.664	241.922	238.016	227.93	356.729	216.194	201.634	249.766	351.879
ENSMUSG00000002396	170.893	215.951	157.455	339.658	362.475	383.137	392.322	425.554	396.07	238.851	254.973	211.062	218.749	181.433	361.756	404.649	230.909	170.893	362.475	396.07	228.8
ENSMUSG00000002409	190.641	318.342	203.957	149.332	117.717	105.589	256.835	215.304	108.887	391.961	482.595	245.147	151.995	237.647	124.213	193.676	317.924	203.957	117.717	215.304	318.554
ENSMUSG00000002413	219.503	206.643	210.484	148.356	312.358	252.408	106.033	192.055	167.47	151.579	135.868	199.264	217.722	212.21	237.707	155.186	176.108	210.484	252.408	167.47	175.421
ENSMUSG00000002416	240.01	351.851	259.433	175.685	173.662	165.925	273.329	389.165	178.932	532.822	462.303	504.714	466.254	283.765	171.757	280.475	491.523	259.433	173.662	273.329	485.484
ENSMUSG00000002428	111.65	106.114	131.348	65.3939	94.4067	80.4486	113.102	70.7572	110.798	96.4592	99.6951	140.271	158.157	116.371	80.0831	98.2189	123.646	111.65	80.4486	110.798	119.983
ENSMUSG00000002455	615.216	539.878	508.261	690.052	655.019	722.027	404.103	529.668	490.311	367.463	413.779	416.881	368.69	554.452	689.033	474.694	391.703	539.878	690.052	490.311	391.235
ENSMUSG00000002458	15.95	8.37741	12.2374	18.5445	13.9862	9.05047	34.1662	19.2055	11.4618	35.2152	8.82258	13.1095	14.3779	12.1883	13.8604	21.6112	17.8813	12.2374	13.9862	19.2055	13.7437
ENSMUSG00000002459	0.759526	0.930824	0	0.976028	0	4.02243	0	1.01082	0.636768	1.5311	1.76452	0	0	0.56345	1.66615	0.549195	0.823903	0.759526	0.976028	0.636768	0.765549
ENSMUSG00000002475	542.302	385.361	542.526	439.213	522.15	494.759	128.418	160.72	208.86	292.44	279.676	304.139	371.771	490.063	485.374	165.999	312.006	542.302	494.759	160.72	298.289
ENSMUSG00000002477	40.2549	71.6734	66.8979	25.3767	41.9585	35.1963	57.729	54.5842	68.1342	78.086	62.6403	78.6567	79.0784	59.6087	34.1772	60.1491	74.6153	66.8979	35.1963	57.729	78.3713
ENSMUSG00000002486	28.862	17.6857	31.8173	35.137	18.6482	23.129	23.5629	24.2596	24.834	32.1531	13.2339	14.4204	30.8098	26.1216	25.6381	24.2188	22.6543	28.862	23.129	24.2596	22.6151
ENSMUSG00000002489	14.431	22.3398	20.3957	17.5685	24.4758	7.03926	0	3.03245	1.27354	85.7415	28.2323	31.4627	21.5668	19.0555	16.3612	1.43533	41.7508	20.3957	17.5685	1.27354	29.8475
ENSMUSG00000002496	453.437	424.456	456.048	639.299	469.702	461.574	382.897	376.024	408.168	764.018	709.335	524.378	449.823	444.647	523.525	389.03	611.888	453.437	469.702	382.897	616.857
ENSMUSG00000002500	0	2.79247	0	4.88014	2.33103	1.00561	167.296	177.904	187.847	4.59329	5.29355	6.55473	9.24293	0.930824	2.73893	177.682	6.42112	0	2.33103	177.904	5.92414
ENSMUSG00000002504	233.174	255.977	217.826	243.031	104.896	120.673	237.985	189.023	149.004	332.248	226.74	142.893	145.833	235.659	156.2	192.004	211.929	233.174	120.673	189.023	186.287
ENSMUSG00000002524	562.809	751.175	637.978	764.23	465.04	499.787	710.421	604.469	611.297	695.118	629.932	635.808	569.981	650.654	576.353	642.062	632.71	637.978	499.787	611.297	632.87
ENSMUSG00000002546	448.12	510.091	387.518	476.302	400.937	373.081	447.695	410.392	438.733	372.057	532.884	433.923	412.851	448.577	416.773	432.273	437.929	448.12	400.937	438.733	423.387
ENSMUSG00000002550	300.772	242.945	245.564	157.141	164.338	158.886	255.657	180.936	200.582	93.397	78.521	98.3209	88.3213	263.094	160.121	212.392	89.64	245.564	158.886	200.582	90.8591
ENSMUSG00000002565	0	1.86165	0	0	0	0	0	0	0	0	0	0	1.02699	0.620549	0	0	0.256748	0	0	0	0
ENSMUSG00000002578	18.2286	18.6165	8.97411	18.5445	10.4896	13.0729	0	4.04327	6.36768	4.59329	7.94032	3.93284	5.13496	15.2731	14.0357	3.47032	5.40035	18.2286	13.0729	4.04327	4.86413
ENSMUSG00000002580	435.208	584.557	515.603	324.041	332.172	344.924	412.35	390.176	500.5	336.842	291.145	327.736	324.53	511.79	333.712	434.342	320.063	515.603	332.172	412.35	326.133
ENSMUSG00000002588	7249.68	8144.71	9072.01	6461.31	6178.39	6105.05	5412.39	5752.56	7555.89	4449.37	4577.15	4854.43	5420.46	8155.46	6248.25	6240.28	4825.35	8144.71	6178.39	5752.56	4715.79
ENSMUSG00000002602	170.893	102.391	173.771	112.243	81.586	54.3028	115.458	146.569	163.013	70.4305	44.9952	44.5721	56.4846	149.018	82.7107	141.68	54.1206	170.893	81.586	146.569	50.7399
ENSMUSG00000002603	85.8264	84.705	92.1886	57.5857	29.1379	40.2243	149.624	114.222	53.4885	194.449	155.277	102.254	96.5373	87.5733	42.316	105.778	137.129	85.8264	40.2243	114.222	128.766
ENSMUSG00000002608	252.163	338.82	279.013	402.124	252.917	266.486	187.325	170.828	140.726	641.53	533.766	343.468	346.096	289.999	307.175	166.293	466.215	279.013	266.486	170.828	439.931
ENSMUSG00000002617	10.6334	30.7172	28.554	36.113	39.6275	37.2075	48.3039	52.5625	74.5019	10.7177	9.70484	10.4876	21.5668	23.3015	37.6493	58.4561	13.1192	28.554	37.2075	52.5625	10.6026
ENSMUSG00000002625	312.925	344.405	267.592	312.329	291.379	296.654	280.398	282.018	318.384	244.976	302.614	281.853	258.802	308.307	300.121	293.6	272.061	312.925	296.654	282.018	270.328
ENSMUSG00000002633	1.51905	3.7233	2.44748	0	1.16551	0	0	0	0.636768	12.2488	3.52903	7.86567	4.10797	2.56328	0.388505	0.212256	6.93786	2.44748	0	0	5.98682
ENSMUSG00000002635	73.674	80.0509	75.0562	63.4418	69.9309	58.3253	36.5224	64.6923	50.9414	48.9951	54.7	43.2612	41.0797	76.2604	63.8993	50.7187	47.009	75.0562	63.4418	50.9414	46.1282
ENSMUSG00000002658	113.929	171.272	123.19	180.565	142.193	157.88	127.24	156.677	154.735	232.727	229.387	222.861	213.614	136.13	160.213	146.217	224.647	123.19	157.88	154.735	226.124
ENSMUSG00000002660	422.296	621.79	389.15	330.874	254.082	282.576	334.593	477.106	295.46	822.199	700.513	658.094	690.139	477.746	289.177	369.053	717.736	422.296	282.576	334.593	695.326
ENSMUSG00000002661	101.776	148.932	93.8202	109.315	85.0825	92.5159	134.308	113.212	73.8651	143.923	156.16	184.843	213.614	114.843	95.6379	107.128	174.635	101.776	92.5159	113.212	170.501
ENSMUSG00000002664	0	1.86165	0	0.976028	1.16551	1.00561	2.35629	0	0	0	2.64677	2.62189	3.08098	0.620549	1.04905	0.785429	2.08741	0	1.00561	0	2.63433
ENSMUSG00000002668	31.9001	39.0946	33.449	62.4658	44.2895	48.2692	40.0569	30.3245	33.1119	88.8037	76.7564	91.7662	79.0784	34.8145	51.6748	34.4978	84.1012	33.449	48.2692	33.1119	83.941
ENSMUSG00000002679	66.0788	82.8433	88.1094	58.5617	79.255	65.3645	54.1946	53.5733	61.7665	90.3348	81.1677	69.4801	101.672	79.0105	67.7271	56.5115	85.6637	82.8433	65.3645	54.1946	85.7512
ENSMUSG00000002688	3.0381	0.930824	0.815828	1.95206	0	3.01682	0	1.01082	0	0	0.882258	1.31095	0	1.59492	1.65629	0.336939	0.548301	0.930824	1.95206	0	0.441129
ENSMUSG00000002699	35.6977	19.5473	23.659	35.137	34.9654	22.1234	3.53443	22.238	25.4707	42.8707	13.2339	32.7736	31.8368	26.3013	30.7419	17.081	30.1787	23.659	34.9654	22.238	32.3052
ENSMUSG00000002718	337.989	308.103	410.362	301.593	479.026	423.361	371.115	298.191	502.41	254.162	242.621	280.542	321.449	352.151	401.327	390.572	274.693	337.989	423.361	371.115	267.352
ENSMUSG00000002728	55.4454	55.8494	77.5037	66.3699	66.4343	63.3533	69.5105	62.6707	103.793	154.641	132.339	116.674	154.049	62.9328	65.3858	78.6581	139.426	55.8494	66.3699	69.5105	143.194
ENSMUSG00000002731	189.881	155.448	184.377	139.572	159.675	141.791	207.353	203.174	224.779	195.981	233.798	242.525	276.261	176.569	147.013	211.769	237.141	184.377	141.791	207.353	238.162
ENSMUSG00000002732	15.95	29.7864	26.1065	30.2569	23.3103	21.1178	102.498	79.8546	93.6049	52.0573	49.4064	51.1269	49.2956	23.9476	24.895	91.986	50.4716	26.1065	23.3103	93.6049	50.2666
ENSMUSG00000002733	239.251	188.026	230.064	174.709	172.496	207.155	201.463	190.034	241.335	240.382	191.45	196.642	211.56	219.114	184.787	210.944	210.009	230.064	174.709	201.463	204.101
ENSMUSG00000002741	727.626	726.973	567.816	776.919	755.253	800.464	766.971	651.977	1049.39	653.779	704.924	853.425	827.756	674.139	777.545	822.781	759.971	726.973	776.919	766.971	766.34
ENSMUSG00000002748	485.337	420.732	451.153	586.593	639.867	770.296	435.913	443.749	437.46	321.531	339.669	474.562	287.558	452.407	665.585	439.041	355.83	451.153	639.867	437.46	330.6
ENSMUSG00000002763	939.534	873.113	695.901	984.813	552.454	683.813	857.688	486.203	499.226	318.468	395.252	432.612	335.826	836.183	740.36	614.373	370.54	873.113	683.813	499.226	365.539
ENSMUSG00000002767	331.913	409.562	320.62	438.237	233.103	269.503	510.136	494.29	435.549	693.587	735.803	618.766	550.468	354.032	313.614	479.992	649.656	331.913	269.503	494.29	656.177
ENSMUSG00000002768	300.772	468.204	307.567	208.87	178.324	162.908	393.5	506.42	292.277	583.348	764.918	647.607	580.251	358.848	183.367	397.399	644.031	307.567	178.324	393.5	615.478
ENSMUSG00000002769	18035.7	27884.7	17729.6	17595.8	8860.24	11504.2	7335.12	7540.7	6502.68	15396.7	13862.9	11941.4	13882.9	21216.7	12653.4	7126.17	13771	18035.7	11504.2	7335.12	13872.9
ENSMUSG00000002771	6.07621	2.79247	3.26331	5.85617	2.33103	6.03365	1.17814	1.01082	1.9103	10.7177	8.82258	3.93284	5.13496	4.044	4.74028	1.36642	7.15201	3.26331	5.85617	1.17814	6.97877
ENSMUSG00000002778	1643.61	2449.93	1544.36	1422.07	938.239	954.322	1475.04	1620.34	1519.97	2379.33	2313.28	2007.06	1643.19	1879.3	1104.88	1538.45	2085.71	1643.61	954.322	1519.97	2160.17
ENSMUSG00000002781	341.787	547.324	314.91	271.336	203.965	189.054	454.763	362.884	274.447	424.114	487.006	393.284	325.557	401.34	221.452	364.031	407.49	341.787	203.965	362.884	408.699
ENSMUSG00000002797	50.8882	67.9501	55.4763	122.004	150.351	161.903	55.3727	63.6815	63.6768	217.416	137.632	152.07	312.206	58.1049	144.753	60.9104	204.831	55.4763	150.351	63.6768	184.743
ENSMUSG00000002799	0	0.930824	1.63166	4.88014	1.16551	2.01122	0	2.02164	3.18384	0	0.882258	1.31095	3.08098	0.85416	2.68562	1.73516	1.31854	0.930824	2.01122	2.02164	1.0966
ENSMUSG00000002803	181.527	188.026	199.062	148.356	138.696	121.679	381.719	197.109	254.07	206.698	184.392	250.39	186.913	189.538	136.244	277.633	207.098	188.026	138.696	254.07	196.805
ENSMUSG00000002804	100.257	112.63	90.5569	130.788	86.2481	93.5215	101.32	125.341	99.9726	241.913	225.858	256.945	238.262	101.148	103.519	108.878	240.745	100.257	93.5215	101.32	240.088
ENSMUSG00000002808	3.0381	5.58494	5.7108	1.95206	2.33103	5.02804	2.35629	5.05409	1.9103	12.2488	24.7032	9.17662	39.0257	4.77795	3.10371	3.10689	21.2886	5.58494	2.33103	2.35629	18.476
ENSMUSG00000002812	485.337	490.544	459.311	615.874	460.378	461.574	712.777	502.376	580.096	396.554	353.785	285.786	312.206	478.397	512.609	598.416	337.083	485.337	461.574	580.096	332.996
ENSMUSG00000002814	76.7121	58.6419	76.6878	92.7227	82.7515	96.5384	131.952	118.266	117.802	99.5214	69.6984	95.699	109.888	70.6806	90.6709	122.673	93.7017	76.6878	92.7227	118.266	97.6102
ENSMUSG00000002820	164.058	161.033	144.402	338.682	172.496	196.094	219.135	140.504	170.017	150.048	199.39	209.751	175.616	156.497	235.757	176.552	183.701	161.033	196.094	170.017	187.503
ENSMUSG00000002825	20.5072	24.2014	15.5007	55.6336	32.6344	46.258	30.6317	35.3786	34.3855	15.311	22.9387	14.4204	31.8368	20.0698	44.842	33.4653	21.1267	20.5072	46.258	34.3855	19.1248
ENSMUSG00000002831	79.7502	56.7803	32.6331	23.4247	53.6137	78.4374	22.3847	62.6707	37.5693	306.22	364.373	137.649	104.753	56.3879	51.8253	40.8749	228.249	56.7803	53.6137	37.5693	221.934
ENSMUSG00000002833	277.227	295.071	247.196	279.144	226.11	209.166	229.738	277.975	246.429	355.215	399.663	319.871	272.153	273.165	238.14	251.381	336.725	277.227	226.11	246.429	337.543
ENSMUSG00000002835	12.9119	6.51577	10.6058	13.6644	11.6551	5.02804	14.1377	23.2488	15.9192	36.7463	37.0548	23.597	46.2146	10.0112	10.1159	17.7686	35.9032	10.6058	11.6551	15.9192	36.9006
ENSMUSG00000002844	73.674	98.6673	79.9511	59.5377	62.9378	52.2916	230.916	297.18	180.205	208.229	244.385	258.256	273.18	84.0975	58.2557	236.101	246.013	79.9511	59.5377	230.916	251.321
ENSMUSG00000002845	79.7502	89.3591	93.0044	163.973	179.489	138.774	95.4296	157.688	165.56	157.703	103.224	104.876	120.158	87.3712	160.745	139.559	121.49	89.3591	163.973	157.688	112.517
ENSMUSG00000002846	281.784	260.631	153.376	225.463	202.799	176.987	300.427	225.412	261.075	214.354	192.332	226.793	204.371	231.93	201.75	262.305	209.463	260.631	202.799	261.075	209.363
ENSMUSG00000002847	385.839	555.702	575.975	370.891	377.627	326.823	620.882	818.762	689.62	623.157	787.856	555.841	606.952	505.839	358.447	709.755	643.452	555.702	370.891	689.62	615.055
ENSMUSG00000002870	37.2168	33.5097	46.5022	53.6816	67.5998	54.3028	126.061	92.9952	106.977	52.0573	77.6387	64.2363	94.4833	39.0762	58.5281	108.678	72.1039	37.2168	54.3028	106.977	70.9375
ENSMUSG00000002871	148.108	182.441	151.744	212.774	144.524	153.858	285.111	240.575	199.945	220.478	293.792	178.289	194.102	160.764	170.385	241.877	221.665	151.744	153.858	240.575	207.29
ENSMUSG00000002881	522.554	546.394	687.743	429.452	553.619	468.613	451.229	352.775	442.554	218.947	194.979	245.147	246.478	585.564	483.895	415.519	226.388	546.394	468.613	442.554	232.047
ENSMUSG00000002885	123.043	106.114	124.822	142.5	86.2481	70.3926	117.814	107.147	83.4166	148.516	98.8129	124.54	101.672	117.993	99.7136	102.793	118.385	123.043	86.2481	107.147	113.106
ENSMUSG00000002897	157.981	170.341	158.271	276.216	198.137	232.295	319.277	306.278	375.693	195.981	254.973	140.271	261.883	162.198	235.55	333.749	213.277	158.271	232.295	319.277	225.477
ENSMUSG00000002900	91.9026	64.2268	96.2677	83.9384	48.9516	71.3982	65.976	95.0169	68.771	53.5884	58.229	34.0846	54.4306	84.1324	68.0961	76.5879	50.0831	91.9026	71.3982	68.771	54.0095
ENSMUSG00000002908	43.293	53.9878	42.4231	81.0104	41.9585	50.2804	118.992	107.147	114.618	35.2152	39.7016	48.505	47.2416	46.5679	57.7498	113.586	42.6659	43.293	50.2804	114.618	43.4716
ENSMUSG00000002910	86.586	130.315	98.7152	154.212	143.358	152.852	303.961	278.986	181.479	157.703	156.16	154.692	113.996	105.205	150.141	254.809	145.638	98.7152	152.852	278.986	155.426
ENSMUSG00000002930	0	0	0	0	0	0	0	0	0	0	0	0	0	0	0	0	0	0	0	0	0
ENSMUSG00000002944	1034.47	383.499	656.742	330.874	456.882	213.189	463.01	258.769	477.576	238.851	392.605	309.383	483.713	691.572	333.648	399.785	356.138	656.742	330.874	463.01	350.994
ENSMUSG00000002948	151.146	126.592	137.059	244.983	194.641	195.088	111.924	152.633	134.995	145.454	114.694	132.405	108.861	138.266	211.571	133.184	125.354	137.059	195.088	134.995	123.549
ENSMUSG00000002949	382.042	376.053	373.649	464.59	312.358	320.789	276.864	268.877	375.693	312.344	344.081	309.383	277.288	377.248	365.912	307.145	310.774	376.053	320.789	276.864	310.863
ENSMUSG00000002957	1187.14	1170.05	1151.13	1094.13	1209.8	1197.68	1240.59	956.233	1171.02	756.362	898.139	915.04	1154.34	1169.44	1167.2	1122.61	930.97	1170.05	1197.68	1171.02	906.589
ENSMUSG00000002963	203.553	209.435	191.72	122.98	106.062	97.544	201.463	219.347	182.116	179.138	237.327	167.801	154.049	201.569	108.862	200.975	184.579	203.553	106.062	201.463	173.47
ENSMUSG00000002968	292.417	372.33	252.907	616.85	290.213	305.705	854.154	456.89	396.707	571.099	532.884	415.57	371.771	305.885	404.256	569.25	472.831	292.417	305.705	456.89	474.227
ENSMUSG00000002980	46.3311	56.7803	28.554	94.6748	41.9585	30.1682	81.2919	40.4327	15.9192	263.349	406.721	167.801	174.589	43.8884	55.6005	45.8813	253.115	46.3311	41.9585	40.4327	218.969
ENSMUSG00000002981	1064.1	1109.54	1030.39	1138.05	892.784	949.294	1638.8	1106.85	1203.49	1483.63	1364.85	1178.54	1214.93	1068.01	993.376	1316.38	1310.49	1064.1	949.294	1203.49	1289.89
ENSMUSG00000002983	13.6715	13.9624	13.8691	22.4487	18.6482	13.0729	38.8787	30.3245	21.0133	7.65549	33.5258	41.9502	27.7288	13.8343	18.0566	30.0722	27.7151	13.8691	18.6482	30.3245	30.6273
ENSMUSG00000002984	199.755	231.775	182.745	400.172	181.82	203.133	334.593	281.007	215.228	166.89	184.392	234.659	147.887	204.759	261.708	276.943	183.457	199.755	203.133	281.007	175.641
ENSMUSG00000002985	124662	180839	106582	126938	64182.5	67117.3	212451	134822	103846	280776	273367	218798	166720	137361	86079.4	150373	234915	124662	67117.3	134822	246082
ENSMUSG00000002992	1490.95	3457.08	2214.16	3142.81	2068.79	1801.04	2051.15	1766.91	2176.47	1417.8	1682.47	1350.27	1143.04	2387.4	2337.55	1998.18	1398.39	2214.16	2068.79	2051.15	1384.03
ENSMUSG00000002996	964.598	936.409	1071.18	1014.09	973.204	867.84	861.223	974.428	1111.16	612.439	748.155	638.43	674.734	990.73	951.713	982.27	668.439	964.598	973.204	974.428	656.582
ENSMUSG00000002997	0.759526	2.79247	4.07914	3.90411	6.99309	2.01122	4.71257	3.03245	6.36768	4.59329	2.64677	5.24378	1.02699	2.54371	4.30281	4.70424	3.37771	2.79247	3.90411	4.71257	3.62003
ENSMUSG00000003031	237.732	252.253	172.14	177.637	175.993	174.976	246.232	147.579	178.932	137.799	150.866	170.423	86.2673	220.708	176.202	190.914	136.339	237.732	175.993	178.932	144.332
ENSMUSG00000003032	4.55716	9.30824	17.1324	6.8322	4.66206	6.03365	11.7814	10.1082	8.27798	18.3732	12.3516	9.17662	10.2699	10.3326	5.84263	10.0559	12.5428	9.30824	6.03365	10.1082	11.3108
ENSMUSG00000003033	289.379	261.562	266.776	315.257	248.255	269.503	487.751	432.63	473.119	676.745	618.463	432.612	467.281	272.572	277.672	464.5	548.775	266.776	269.503	473.119	542.872
ENSMUSG00000003037	735.221	925.239	774.221	735.925	553.619	666.718	762.259	959.266	994.632	894.161	1253.69	981.898	864.727	811.56	652.088	905.386	998.619	774.221	666.718	959.266	938.029
ENSMUSG00000003038	59.243	101.46	70.977	4.88014	11.6551	7.03926	9.42515	27.2921	0	29.0909	18.5274	20.9751	22.5938	77.2266	7.85818	12.2391	22.7968	70.977	7.03926	9.42515	21.7845
ENSMUSG00000003039	537.744	729.766	593.107	686.148	560.612	676.774	832.947	1091.68	924.587	1854.16	1901.27	1456.46	1491.19	620.206	641.178	949.739	1675.77	593.107	676.774	924.587	1672.68
ENSMUSG00000003051	3.79763	13.0315	6.52662	7.80823	3.49654	6.03365	411.172	353.786	184.026	12.2488	3.52903	1.31095	4.10797	7.78526	5.77947	316.328	5.29918	6.52662	6.03365	353.786	3.8185
ENSMUSG00000003053	17512.4	16167.5	21972.7	8767.66	18417.5	10822.4	143.734	349.743	510.688	27062.2	20472.8	21972.7	23258.3	18550.9	12669.2	334.721	23191.5	17512.4	10822.4	349.743	22615.5
ENSMUSG00000003062	79.7502	80.0509	97.8994	87.8426	64.1033	66.3701	80.1138	63.6815	84.0534	94.9281	69.6984	124.54	150.968	85.9001	72.772	75.9496	110.034	80.0509	66.3701	80.1138	109.734
ENSMUSG00000003068	840.795	1016.46	775.852	933.083	488.351	587.275	900.102	559.993	625.306	776.267	795.797	752.482	685.004	877.702	669.57	695.134	752.387	840.795	587.275	625.306	764.374
ENSMUSG00000003070	1.51905	0.930824	1.63166	0	2.33103	0	2.35629	0	0.636768	0	1.76452	0	0	1.36051	0.77701	0.997685	0.441129	1.51905	0	0.636768	0
ENSMUSG00000003072	2080.34	3018.66	2516.01	2040.88	1149.2	1160.47	2558.93	4149.41	1667.7	6168.79	6267.56	4142.59	3781.39	2538.34	1450.18	2792.01	5090.08	2516.01	1160.47	2558.93	5155.69
ENSMUSG00000003099	404.068	411.424	355.701	548.528	402.102	470.625	352.265	486.203	303.738	460.86	533.766	486.361	484.74	390.398	473.752	380.736	491.432	404.068	470.625	352.265	485.55
ENSMUSG00000003119	171.653	119.145	159.086	185.445	265.737	255.424	88.3608	167.796	105.703	211.291	223.211	213.684	238.262	149.962	235.536	120.62	221.612	159.086	255.424	105.703	218.448
ENSMUSG00000003123	144.31	181.511	120.743	223.51	171.331	151.847	301.605	127.363	194.851	300.095	284.969	158.624	136.59	148.854	182.229	207.94	220.07	144.31	171.331	194.851	221.797
ENSMUSG00000003131	332.672	326.719	380.176	330.874	307.696	385.148	295.714	295.159	352.77	189.856	167.629	194.02	223.884	346.522	341.239	314.547	193.847	332.672	330.874	295.714	191.938
ENSMUSG00000003134	142.031	94.0132	111.768	173.733	165.503	190.06	122.527	133.428	134.358	79.6171	78.521	73.4129	93.4563	115.938	176.432	130.104	81.2518	111.768	173.733	133.428	79.069
ENSMUSG00000003153	0	0	0	0	1.16551	1.00561	0	0	0	0	0	0	0	0	0.723707	0	0	0	1.00561	0	0
ENSMUSG00000003154	145.829	149.863	159.902	142.5	155.013	173.97	126.061	141.514	159.192	215.885	170.276	108.808	109.888	151.865	157.161	142.256	151.214	149.863	155.013	141.514	140.082
ENSMUSG00000003161	270.391	344.405	356.517	160.069	179.489	167.937	128.418	128.374	144.546	117.895	83.8145	74.7239	107.834	323.771	169.165	133.779	96.0668	344.405	167.937	128.418	95.8243
ENSMUSG00000003166	508.882	510.091	547.421	747.638	646.86	648.617	659.76	477.106	690.893	321.531	348.492	427.368	400.527	522.131	681.038	609.253	374.479	510.091	648.617	659.76	374.509
ENSMUSG00000003178	56.2049	33.5097	29.3698	65.3939	142.193	174.976	23.5629	133.428	52.8517	137.799	89.9903	138.96	101.672	39.6948	127.521	69.9475	117.105	33.5097	142.193	52.8517	119.736
ENSMUSG00000003184	592.43	749.313	575.975	452.877	278.558	332.856	908.349	814.719	653.324	708.898	778.151	562.395	524.793	639.239	354.764	792.131	643.56	592.43	332.856	814.719	635.647
ENSMUSG00000003190	65.3192	103.321	77.5037	61.4898	48.9516	53.2972	78.9356	62.6707	50.9414	71.9616	56.4645	44.5721	40.0527	82.0481	54.5795	64.1826	53.2627	77.5037	53.2972	62.6707	50.5183
ENSMUSG00000003198	68.3573	57.7111	79.1353	21.4726	34.9654	28.157	24.741	24.2596	42.0267	33.6842	24.7032	45.8831	48.2686	68.4012	28.1984	30.3424	38.1348	68.3573	28.157	24.741	39.7836
ENSMUSG00000003199	499.768	669.262	488.681	814.008	486.019	663.701	355.799	258.769	289.729	241.913	227.623	317.249	245.451	552.57	654.576	301.433	258.059	499.768	663.701	289.729	243.682
ENSMUSG00000003200	159.5	187.096	191.72	241.079	185.317	269.503	394.678	273.932	228.6	197.512	239.974	182.221	160.211	179.439	231.966	299.07	194.979	187.096	241.079	273.932	189.866
ENSMUSG00000003206	3.0381	0.930824	2.44748	2.92809	0	4.02243	2.35629	5.05409	3.18384	0	1.76452	1.31095	2.05398	2.1388	2.31684	3.53141	1.28236	2.44748	2.92809	3.18384	1.53773
ENSMUSG00000003208	18.2286	36.3021	28.554	81.0104	40.793	40.2243	27.0973	46.4976	34.3855	48.9951	62.6403	55.0597	42.1067	27.6949	54.0092	35.9935	52.2005	28.554	40.793	34.3855	52.0274
ENSMUSG00000003226	581.037	514.746	623.293	447.021	1219.13	1033.76	220.313	349.743	356.59	277.129	315.848	538.798	611.06	573.025	899.971	308.882	435.709	581.037	1033.76	349.743	427.323
ENSMUSG00000003227	0	0	0	0	0	1.00561	0	2.02164	2.54707	0	0	0	1.02699	0	0.335203	1.5229	0.256748	0	0	2.02164	0
ENSMUSG00000003228	36.4572	29.7864	42.4231	23.4247	39.6275	29.1626	5.89072	19.2055	22.9237	12.2488	19.4097	34.0846	27.7288	36.2222	30.7383	16.0066	23.368	36.4572	29.1626	19.2055	23.5692
ENSMUSG00000003233	92.6622	56.7803	93.0044	151.284	111.889	115.645	100.142	147.579	81.5063	301.626	199.39	106.187	101.672	80.8156	126.273	109.743	177.219	92.6622	115.645	100.142	152.788
ENSMUSG00000003234	367.611	354.644	414.441	480.206	452.22	538	279.22	391.186	427.908	387.368	401.427	441.788	393.338	378.898	490.142	366.105	405.98	367.611	480.206	391.186	397.383
ENSMUSG00000003235	382.042	387.223	365.491	455.805	375.296	444.479	300.427	250.683	391.612	225.071	233.798	309.383	301.936	378.252	425.193	314.241	267.547	382.042	444.479	300.427	267.867
ENSMUSG00000003269	145.069	162.894	110.953	183.493	148.02	150.841	289.823	166.785	211.407	176.076	161.453	152.07	126.32	139.639	160.785	222.672	153.98	145.069	150.841	211.407	156.761
ENSMUSG00000003271	0.759526	0	0	0	0	0	89.5389	69.7464	73.2283	93.397	104.989	104.876	100.645	0.253175	0	77.5046	100.977	0	0	73.2283	102.76
ENSMUSG00000003273	7.59526	2.79247	5.7108	25.3767	11.6551	31.1738	11.7814	2.02164	6.36768	44.4018	78.521	39.3284	28.7558	5.36618	22.7352	6.72358	47.7517	5.7108	25.3767	6.36768	41.8651
ENSMUSG00000003279	30.381	42.8179	37.5281	12.6884	29.1379	17.0953	7.06886	17.1839	9.55152	4.59329	7.94032	11.7985	9.24293	36.909	19.6405	11.2681	8.39376	37.5281	17.0953	9.55152	8.59163
ENSMUSG00000003282	2.27858	2.79247	0	4.88014	4.66206	7.03926	0	0	0	0	1.76452	3.93284	2.05398	1.69035	5.52715	0	1.93783	2.27858	4.88014	0	1.90925
ENSMUSG00000003283	33.4191	12.1007	27.7382	16.5925	15.1517	12.0673	12.9596	31.3353	36.9325	10.7177	5.29355	30.1517	21.5668	24.4193	14.6038	27.0758	16.9325	27.7382	15.1517	31.3353	16.1423
ENSMUSG00000003299	275.708	356.506	259.433	216.678	145.689	146.819	230.916	201.153	166.833	509.856	516.121	403.771	394.365	297.216	169.729	199.634	456.028	275.708	146.819	201.153	456.813
ENSMUSG00000003308	435.968	550.117	405.467	603.186	438.233	485.709	790.534	491.257	511.962	382.774	360.843	439.167	434.418	463.85	509.043	597.918	404.301	435.968	485.709	511.962	408.596
ENSMUSG00000003309	3.0381	3.7233	6.52662	1.95206	4.66206	0	0	3.03245	0.636768	4.59329	1.76452	3.93284	2.05398	4.42934	2.2047	1.22307	3.08616	3.7233	1.95206	0.636768	2.99341
ENSMUSG00000003316	371.408	300.656	339.384	477.278	703.971	722.027	375.828	474.073	486.491	180.67	183.51	241.214	261.883	337.15	634.425	445.464	216.819	339.384	703.971	474.073	212.362
ENSMUSG00000003341	0	0	0	0	0	0	0	0	0	0	0	0	0	0	0	0	0	0	0	0	0
ENSMUSG00000003344	265.834	341.612	266.776	378.699	228.441	203.133	544.302	376.024	323.478	679.807	771.976	435.234	420.04	291.407	270.091	414.602	576.764	266.776	228.441	376.024	557.521
ENSMUSG00000003345	679.776	786.546	501.734	829.624	536.137	502.804	1426.73	1144.25	713.817	1047.27	1159.29	974.032	791.811	656.019	622.855	1094.93	993.1	679.776	536.137	1144.25	1010.65
ENSMUSG00000003346	434.449	495.198	399.756	784.727	446.392	396.21	1105.1	621.653	526.607	451.674	443.776	563.706	511.442	443.134	542.443	751.12	492.65	434.449	446.392	621.653	481.558
ENSMUSG00000003348	10.6334	14.8932	13.8691	24.4007	23.3103	15.0841	31.8099	29.3137	15.9192	26.0287	21.1742	23.597	21.5668	13.1319	20.9317	25.6809	23.0917	13.8691	23.3103	29.3137	22.5819
ENSMUSG00000003352	4.55716	5.58494	5.7108	8.78426	3.49654	6.03365	14.1377	9.09736	1.27354	4.59329	5.29355	0	5.13496	5.2843	6.10482	8.16954	3.75545	5.58494	6.03365	9.09736	4.86413
ENSMUSG00000003354	2.27858	1.86165	0.815828	0	0	2.01122	0	0	0	0	0.882258	0	0	1.65202	0.670405	0	0.220564	1.86165	0	0	0
ENSMUSG00000003355	71.3954	106.114	73.4245	54.6576	40.793	51.286	21.2066	16.1731	8.91475	12.2488	57.3468	30.1517	41.0797	83.6446	48.9122	15.4315	35.2067	73.4245	51.286	16.1731	35.6157
ENSMUSG00000003360	440.525	327.65	291.251	657.843	533.806	567.163	546.659	543.82	677.521	496.076	631.697	544.042	527.874	353.142	586.271	589.333	549.922	327.65	567.163	546.659	535.958
ENSMUSG00000003363	268.872	238.291	230.064	379.675	230.772	293.638	389.966	304.256	271.9	427.176	352.021	327.736	299.882	245.742	301.361	322.041	351.704	238.291	293.638	304.256	339.879
ENSMUSG00000003378	136.715	98.6673	75.872	123.956	62.9378	84.4711	4.71257	6.06491	8.91475	21.4354	21.1742	17.0423	12.3239	103.751	90.4548	6.56408	17.9939	98.6673	84.4711	6.06491	19.1082
ENSMUSG00000003379	12.9119	5.58494	5.7108	11.7123	3.49654	2.01122	0	6.06491	7.64122	13.7799	3.52903	7.86567	5.13496	8.06923	5.74003	4.56871	7.57739	5.7108	3.49654	6.06491	6.50032
ENSMUSG00000003380	404.068	487.752	333.674	406.028	250.586	270.509	465.367	399.273	249.613	1015.12	962.543	896.686	793.865	408.498	309.041	371.418	917.053	404.068	270.509	399.273	929.615
ENSMUSG00000003382	132.158	148.001	129.717	170.805	200.468	209.166	197.928	284.04	241.972	107.177	104.106	116.674	112.969	136.625	193.48	241.313	110.232	132.158	200.468	241.972	110.073
ENSMUSG00000003402	1004.09	1320.84	901.49	1227.84	655.019	721.021	1204.06	1007.79	811.879	973.778	1369.26	1042.2	902.726	1075.47	867.961	1007.91	1071.99	1004.09	721.021	1007.79	1007.99
ENSMUSG00000003410	0	0	0	0	0	0	0	0	0	0	0	0	0	0	0	0	0	0	0	0	0
ENSMUSG00000003411	4.55716	0.930824	1.63166	0	0	0	0	0	0	0	0	0	2.05398	2.37321	0	0	0.513496	1.63166	0	0	0
ENSMUSG00000003418	0	0	1.63166	0.976028	2.33103	0	0	4.04327	2.54707	0	0	0	0	0.543885	1.10235	2.19678	0	0	0.976028	2.54707	0
ENSMUSG00000003420	1855.52	2006.86	1614.52	1526.51	1113.07	1048.85	2046.44	1372.69	1462.66	1803.63	1880.97	1469.57	1244.71	1825.63	1229.47	1627.26	1599.72	1855.52	1113.07	1462.66	1636.6
ENSMUSG00000003421	161.779	222.467	173.771	243.031	145.689	149.836	313.386	308.299	203.766	437.894	434.953	251.701	237.235	186.006	179.519	275.15	340.446	173.771	149.836	308.299	343.327
ENSMUSG00000003423	214.946	269.939	239.853	145.428	82.7515	103.578	160.228	101.082	99.9726	116.363	112.929	83.9005	111.942	241.579	110.586	120.427	106.284	239.853	103.578	101.082	112.436
ENSMUSG00000003429	189.122	218.744	175.403	294.761	268.068	288.609	287.467	242.596	459.747	206.698	133.221	107.497	127.347	194.423	283.813	329.937	143.691	189.122	288.609	287.467	130.284
ENSMUSG00000003435	606.861	851.704	681.216	830.6	595.578	680.797	494.82	671.183	625.943	1286.12	1342.8	727.574	699.382	713.26	702.325	597.315	1013.97	681.216	680.797	625.943	1006.85
ENSMUSG00000003436	0	0	0	0	0	0	0	0	0	0	0	0	0	0	0	0	0	0	0	0	0
ENSMUSG00000003437	295.456	412.355	314.91	307.449	212.124	221.234	265.082	375.013	298.644	391.961	459.656	318.56	289.612	340.907	246.935	312.913	364.947	314.91	221.234	298.644	355.26
ENSMUSG00000003438	259.758	290.417	225.169	337.706	233.103	228.273	405.281	235.521	255.981	381.243	341.434	367.065	421.067	258.448	266.361	298.928	377.702	259.758	233.103	255.981	374.154
ENSMUSG00000003444	44.812	62.3652	35.0806	21.4726	18.6482	20.1122	124.883	87.9411	91.6946	323.062	175.569	175.667	168.427	47.4193	20.0777	101.506	210.681	44.812	20.1122	91.6946	175.618
ENSMUSG00000003452	0.759526	1.86165	0.815828	0.976028	0	4.02243	0	0	0.636768	1.5311	0	2.62189	0	1.14567	1.66615	0.212256	1.03825	0.815828	0.976028	0	0.765549
ENSMUSG00000003458	480.78	450.519	516.419	613.922	503.502	444.479	484.217	524.614	490.311	1076.36	753.448	597.791	507.334	482.573	520.634	499.714	733.734	480.78	503.502	490.311	675.62
ENSMUSG00000003464	1541.84	1535.86	1585.15	873.545	744.764	615.432	1090.96	947.136	1206.68	1514.26	1799.81	1746.18	1644.21	1554.28	744.58	1081.59	1676.11	1541.84	744.764	1090.96	1695.2
ENSMUSG00000003469	0.759526	0	0.815828	5.85617	2.33103	0	0	0	0.636768	33.6842	20.2919	17.0423	8.21594	0.525118	2.72907	0.212256	19.8086	0.759526	2.33103	0	18.6671
ENSMUSG00000003476	6.83573	0.930824	5.7108	2.92809	4.66206	0	0	0	0	85.7415	68.8161	44.5721	62.6465	4.49245	2.53005	0	65.4441	5.7108	2.92809	0	65.7313
ENSMUSG00000003477	5805.06	7024	6347.96	180.565	726.115	88.4935	64.7979	149.601	75.7754	20496.8	24266.5	38718.8	25277.4	6392.34	331.725	96.7248	27189.9	6347.96	180.565	75.7754	24771.9
ENSMUSG00000003484	0	7.44659	0.815828	2.92809	2.33103	1.00561	0	1.01082	0.636768	0	0.882258	0	0	2.75414	2.08824	0.549195	0.220564	0.815828	2.33103	0.636768	0
ENSMUSG00000003500	18.2286	22.3398	18.764	29.2809	17.4827	13.0729	21.2066	47.5084	17.1927	16.8421	25.5855	26.2189	16.4319	19.7775	19.9455	28.6359	21.2696	18.764	17.4827	21.2066	21.2138
ENSMUSG00000003505	0	0	0	0	0	0	0	0	0	0	0	0	0	0	0	0	0	0	0	0	0
ENSMUSG00000003518	568.885	475.651	581.685	487.038	495.344	599.342	1571.64	1596.08	1367.78	356.746	277.911	318.56	372.798	542.074	527.241	1511.83	331.504	568.885	495.344	1571.64	337.653
ENSMUSG00000003526	78.9907	42.8179	47.318	72.2261	44.2895	37.2075	101.32	246.64	50.9414	381.243	442.011	519.134	656.248	56.3755	51.241	132.967	499.659	47.318	44.2895	101.32	480.573
ENSMUSG00000003527	58.4835	67.9501	57.108	63.4418	55.9447	49.2748	88.3608	86.9303	80.8695	249.569	183.51	121.918	115.023	61.1805	56.2204	85.3869	167.505	58.4835	55.9447	86.9303	152.714
ENSMUSG00000003528	3354.83	4173.81	3373.45	3129.15	2397.46	1707.52	4812.72	4347.53	4305.19	4567.26	4915.94	4825.59	3649.93	3634.03	2411.38	4488.48	4489.68	3373.45	2397.46	4347.53	4696.43
ENSMUSG00000003531	378.244	436.556	344.279	321.113	229.606	215.2	375.828	249.672	328.572	639.999	552.293	664.649	591.547	386.36	255.307	318.024	612.122	378.244	229.606	328.572	615.773
ENSMUSG00000003534	20.5072	28.8555	16.3166	44.8973	12.8207	11.0617	102.498	98.0493	44.5738	27.5598	24.7032	19.6642	15.4049	21.8931	22.9266	81.7072	21.833	20.5072	12.8207	98.0493	22.1837
ENSMUSG00000003541	9.11431	8.37741	7.34245	9.76028	4.66206	4.02243	20.0284	21.2272	14.6457	30.622	20.2919	10.4876	18.4859	8.27806	6.14826	18.6338	19.9718	8.37741	4.66206	20.0284	19.3889
ENSMUSG00000003545	3.0381	0.930824	3.26331	1.95206	1.16551	3.01682	3.53443	26.2813	3.82061	1.5311	7.05806	1.31095	5.13496	2.41075	2.0448	11.2121	3.75877	3.0381	1.95206	3.82061	3.33303
ENSMUSG00000003546	545.34	549.186	451.153	644.179	444.061	503.81	599.675	657.031	545.71	949.281	1174.29	884.888	874.997	515.226	530.683	600.806	970.863	545.34	503.81	599.675	917.084
ENSMUSG00000003549	28.862	50.2645	53.8447	42.9452	30.3034	33.1851	51.8383	47.5084	26.1075	223.54	224.976	136.338	107.834	44.3237	35.4779	41.8181	173.172	50.2645	33.1851	47.5084	179.939
ENSMUSG00000003555	111.65	148.001	132.164	123.956	57.1102	51.286	23.5629	20.2164	32.4752	14937.4	19846.4	13022.9	11309.2	130.605	77.4506	25.4181	14779	132.164	57.1102	23.5629	13980.2
ENSMUSG00000003559	385.08	441.211	398.94	357.226	279.723	307.716	49.482	46.4976	34.3855	1834.26	2421.8	2376.74	1960.53	408.41	314.889	43.455	2148.33	398.94	307.716	46.4976	2168.64
ENSMUSG00000003573	8.35479	4.65412	6.52662	16.5925	11.6551	13.0729	0	11.119	10.1883	13.7799	23.821	17.0423	16.4319	6.51184	13.7735	7.10243	17.7688	6.52662	13.0729	10.1883	16.7371
ENSMUSG00000003575	132.158	157.309	124.006	202.038	121.213	113.634	172.009	135.45	131.811	195.981	168.511	129.784	136.59	137.824	145.628	146.423	157.716	132.158	121.213	135.45	152.551
ENSMUSG00000003581	116.207	77.2584	89.7411	99.5549	86.2481	88.4935	150.802	105.125	106.34	104.115	83.8145	83.9005	82.1594	94.4023	91.4322	120.756	88.4973	89.7411	88.4935	106.34	83.8575
ENSMUSG00000003585	8058.57	9181.65	8086.49	5993.79	5468.59	5512.74	6075.69	7602.36	7147.08	10901.4	15023.1	12826.3	12056.9	8442.23	5658.38	6941.71	12701.9	8086.49	5512.74	7147.08	12441.6
ENSMUSG00000003604	110.131	167.548	137.059	100.531	121.213	135.757	210.888	125.341	215.864	73.4927	97.9306	114.052	157.13	138.246	119.167	184.031	110.651	137.059	121.213	210.888	105.991
ENSMUSG00000003617	8423.14	5852.09	8558.85	5519.44	9512.93	8206.77	7319.81	7270.81	9453.46	7141.04	9459.57	11798.5	11632.7	7611.36	7746.38	8014.69	10008	8423.14	8206.77	7319.81	10546.2
ENSMUSG00000003623	6010.13	4941.74	6543.76	2371.75	4042	3773.04	2343.33	2530.08	2515.87	1567.84	1669.23	2433.11	3568.8	5831.88	3395.6	2463.09	2309.75	6010.13	3773.04	2515.87	2051.17
ENSMUSG00000003644	174.691	185.234	190.904	146.404	149.186	104.583	625.594	446.781	424.724	381.243	361.726	313.316	240.316	183.61	133.391	499.033	324.15	185.234	146.404	446.781	337.521
ENSMUSG00000003657	0	0	0	0	0	0	0	0	0	0	0	0	0	0	0	0	0	0	0	0	0
ENSMUSG00000003660	584.835	488.683	648.583	914.539	1184.16	1124.27	517.205	701.507	695.351	937.032	946.663	803.609	854.457	574.034	1074.32	638.021	885.44	584.835	1124.27	695.351	895.745
ENSMUSG00000003662	434.449	448.657	455.232	364.059	328.675	343.918	249.766	568.08	249.613	554.257	691.69	658.094	620.303	446.113	345.551	355.82	631.086	448.657	343.918	249.766	639.199
ENSMUSG00000003665	0	0	0	0	2.33103	0	2.35629	0	0.636768	0	0.882258	0	0	0	0.77701	0.997685	0.220564	0	0	0.636768	0
ENSMUSG00000003680	39.4953	28.8555	24.4748	36.113	17.4827	35.1963	100.142	68.7356	61.1297	22.9665	22.0564	22.2861	20.5398	30.9419	29.5973	76.6692	21.9622	28.8555	35.1963	68.7356	22.1713
ENSMUSG00000003721	1772.73	1299.43	1654.5	1507.96	3634.07	3621.19	1536.3	2822.2	2692.26	459.329	704.924	676.448	1159.47	1575.55	2921.08	2350.25	750.044	1654.5	3621.19	2692.26	690.686
ENSMUSG00000003731	642.559	589.212	633.898	622.706	701.64	674.763	408.816	642.88	708.723	705.836	616.698	566.328	616.195	621.89	666.37	586.806	626.264	633.898	674.763	642.88	616.447
ENSMUSG00000003746	2485.17	2051.54	2414.04	1580.19	1935.92	2032.33	2002.84	1768.93	1740.29	1544.88	1743.34	2311.2	2043.71	2316.91	1849.48	1837.35	1910.78	2414.04	1935.92	1768.93	1893.53
ENSMUSG00000003752	85.8264	88.4283	72.6087	86.8665	92.0756	102.572	74.223	75.8113	60.493	62.775	65.2871	30.1517	55.4576	82.2878	93.8381	70.1758	53.4179	85.8264	92.0756	74.223	59.1163
ENSMUSG00000003762	208.87	222.467	146.033	186.421	120.048	136.763	276.864	233.499	185.936	231.196	296.439	224.172	239.289	192.457	147.744	232.1	247.774	208.87	136.763	233.499	235.242
ENSMUSG00000003778	113.929	118.215	106.058	132.74	131.703	128.718	124.883	123.32	101.883	116.363	110.282	106.187	128.374	112.734	131.054	116.695	115.302	113.929	131.703	123.32	113.323
ENSMUSG00000003779	44.0525	49.3337	62.0029	35.137	52.4481	46.258	42.4132	67.7248	66.2239	36.7463	34.4081	36.7065	58.5386	51.7964	44.6144	58.7873	41.5999	49.3337	46.258	66.2239	36.7264
ENSMUSG00000003808	176.21	172.202	146.033	267.432	189.979	260.452	235.629	229.456	205.039	229.665	216.153	180.91	199.236	164.815	239.288	223.375	206.491	172.202	260.452	229.456	207.695
ENSMUSG00000003809	5435.93	5126.05	5953.1	4610.76	4172.54	4551.38	3024.29	3211.37	4155.55	6975.68	9261.06	7696.56	6365.3	5505.02	4444.89	3463.74	7574.65	5435.93	4551.38	3211.37	7336.12
ENSMUSG00000003810	199.755	211.297	190.088	276.216	310.027	336.879	306.317	358.84	312.653	237.32	245.268	140.271	161.238	200.38	307.707	325.937	196.024	199.755	310.027	312.653	199.279
ENSMUSG00000003812	106.334	84.705	69.3454	15.6165	18.6482	14.0785	0	0	0	15.311	6.17581	6.55473	4.10797	86.7947	16.1144	0	8.03737	84.705	15.6165	0	6.36527
ENSMUSG00000003813	338.749	322.065	283.908	281.096	165.503	191.066	399.391	381.078	264.896	485.358	500.24	390.662	409.77	314.907	212.555	348.455	446.507	322.065	191.066	381.078	447.564
ENSMUSG00000003814	8894.81	9790.41	10471.2	7060.59	7242.51	7394.24	7904.16	8105.75	8309.82	10674.8	11704	10935.9	11401.7	9718.79	7232.44	8106.58	11179.1	9790.41	7242.51	8105.75	11168.8
ENSMUSG00000003824	75.1931	61.4344	100.347	87.8426	87.4136	62.3477	11.7814	14.1514	40.7532	15.311	14.1161	24.908	18.4859	78.9914	79.2013	22.2287	18.2052	75.1931	87.4136	14.1514	16.8984
ENSMUSG00000003847	530.909	430.971	465.838	607.09	1156.19	1279.13	273.329	507.43	447.011	335.31	420.837	420.813	359.447	475.906	1014.14	409.257	384.102	465.838	1156.19	447.011	390.13
ENSMUSG00000003848	100.257	103.321	102.794	106.387	55.9447	104.583	123.705	109.168	100.609	183.732	157.924	128.473	144.806	102.124	88.9717	111.161	153.734	102.794	104.583	109.168	151.365
ENSMUSG00000003849	94.9407	104.252	130.532	178.613	185.317	170.953	453.585	588.296	615.755	3.0622	5.29355	1.31095	3.08098	109.909	178.294	552.545	3.18692	104.252	178.613	588.296	3.07159
ENSMUSG00000003863	0	1.86165	0	0	0	0	0	0	0.636768	0	0.882258	2.62189	1.02699	0.620549	0	0.212256	1.13279	0	0	0	0.954625
ENSMUSG00000003865	20.5072	14.8932	22.8432	44.8973	38.462	38.2131	22.3847	20.2164	24.834	45.9329	54.7	40.6393	36.9717	19.4145	40.5241	22.4783	44.561	20.5072	38.462	22.3847	43.2861
ENSMUSG00000003868	77.4716	84.705	86.4778	143.476	73.4274	98.5496	154.337	102.093	106.977	145.454	118.223	112.741	118.104	82.8848	105.151	121.135	123.631	84.705	98.5496	106.977	118.163
ENSMUSG00000003872	0	0	0	0	1.16551	0	0	0	0.636768	0	0	0	1.02699	0	0.388505	0.212256	0.256748	0	0	0	0
ENSMUSG00000003873	134.436	157.309	106.873	108.339	76.9239	93.5215	213.244	191.045	177.022	179.138	157.042	176.978	141.725	132.873	92.9282	193.77	163.721	134.436	93.5215	191.045	167.01
ENSMUSG00000003882	6.83573	1.86165	0.815828	0	2.33103	2.01122	3.53443	5.05409	1.9103	0	0	1.31095	0	3.17107	1.44741	3.49961	0.327736	1.86165	2.01122	3.53443	0
ENSMUSG00000003923	476.982	422.594	426.678	322.089	351.985	368.053	368.759	270.899	384.608	278.66	233.798	373.619	384.095	442.085	347.376	341.422	317.543	426.678	351.985	368.759	326.14
ENSMUSG00000003929	52.4073	22.3398	39.1597	33.185	64.1033	42.2355	4.71257	16.1731	33.1119	68.8994	57.3468	51.1269	55.4576	37.9689	46.5079	17.9992	58.2076	39.1597	42.2355	16.1731	56.4022
ENSMUSG00000003934	0	2.79247	1.63166	0	1.16551	0	0	0	0	0	0.882258	1.31095	0	1.47471	0.388505	0	0.548301	1.63166	0	0	0.441129
ENSMUSG00000003948	66.8383	88.4283	75.0562	7.80823	8.1586	4.02243	57.729	56.6058	21.0133	75.0238	45.8774	40.6393	37.9987	76.7742	6.66309	45.1161	49.8848	75.0562	7.80823	56.6058	43.2584
ENSMUSG00000003949	442.804	455.173	629.819	700.788	576.93	693.869	1085.07	853.13	913.762	1108.51	817.853	727.574	405.662	509.265	657.196	950.654	764.901	455.173	693.869	913.762	772.714
ENSMUSG00000003955	311.406	390.015	323.884	252.791	245.924	249.391	268.617	239.564	311.38	323.062	236.445	251.701	269.072	341.768	249.369	273.187	270.07	323.884	249.391	268.617	260.387
ENSMUSG00000003970	1645.13	2421.07	1608	2485.94	1306.54	1375.67	2318.59	1591.03	1512.96	2472.72	2314.16	2464.58	2367.22	1891.4	1722.72	1807.52	2404.67	1645.13	1375.67	1591.03	2415.9
ENSMUSG00000003974	0.759526	0	0	0	0	0	0	0	0.636768	0	0	0	0	0.253175	0	0.212256	0	0	0	0	0
ENSMUSG00000003992	17.4691	13.0315	21.2115	30.2569	15.1517	33.1851	2.35629	6.06491	4.45738	10.7177	13.2339	11.7985	11.2969	17.2374	26.1979	4.29286	11.7617	17.4691	30.2569	4.45738	11.5477
ENSMUSG00000004018	72.155	71.6734	89.7411	40.9932	57.1102	47.2636	32.988	45.4868	29.2913	4.59329	19.4097	31.4627	26.7018	77.8565	48.4557	35.922	20.5419	72.155	47.2636	32.988	23.0557
ENSMUSG00000004031	0	0	0	0	0	0	0	1.01082	0	0	0	0	0	0	0	0.336939	0	0	0	0	0
ENSMUSG00000004032	86.586	88.4283	68.5296	46.8494	36.1309	34.1907	127.24	99.0601	198.035	162.296	145.573	171.734	186.913	81.1813	39.057	141.445	166.629	86.586	36.1309	127.24	167.015
ENSMUSG00000004035	638.002	841.465	730.166	1367.42	997.68	978.457	289.823	323.462	469.935	3893.58	4213.66	2961.42	2935.14	736.544	1114.52	361.073	3500.95	730.166	997.68	323.462	3427.5
ENSMUSG00000004038	373.687	522.192	547.421	100.531	228.441	103.578	791.712	542.809	1302.83	102.584	97.9306	110.119	109.888	481.1	144.183	879.116	105.13	522.192	103.578	791.712	106.236
ENSMUSG00000004040	929.66	1087.2	1015.71	994.573	898.612	963.372	525.452	623.674	615.755	1390.24	1339.27	1060.55	1239.58	1010.86	952.186	588.294	1257.41	1015.71	963.372	615.755	1289.42
ENSMUSG00000004043	140.512	161.963	173.771	197.158	187.648	230.284	172.009	160.72	133.721	102.584	146.455	124.54	158.157	158.749	205.03	155.483	132.934	161.963	197.158	160.72	135.497
ENSMUSG00000004044	139.753	195.473	132.98	212.774	129.372	103.578	176.722	141.514	107.614	68.8994	95.2839	94.388	71.8895	156.069	148.575	141.95	82.6152	139.753	129.372	141.514	83.1387
ENSMUSG00000004054	495.211	579.903	403.835	554.384	325.179	361.013	630.307	512.485	352.133	431.77	449.069	389.351	325.557	492.983	413.525	498.308	398.937	495.211	361.013	512.485	410.56
ENSMUSG00000004056	540.023	553.84	553.131	837.432	655.019	635.544	696.283	390.176	503.047	760.956	723.451	398.527	341.988	548.998	709.332	529.835	556.231	553.131	655.019	503.047	560.989
ENSMUSG00000004069	34.1787	42.8179	39.1597	37.0891	43.124	57.3197	55.3727	57.6166	30.5649	0	0	0	0	38.7188	45.8443	47.8514	0	39.1597	43.124	55.3727	0
ENSMUSG00000004070	264.315	304.379	316.541	253.767	227.275	301.682	406.46	385.122	499.863	293.971	326.435	367.065	321.449	295.079	260.908	430.481	327.23	304.379	253.767	406.46	323.942
ENSMUSG00000004071	809.655	754.898	816.644	1587.02	970.873	1273.1	665.651	762.156	608.113	1675.02	1569.54	1161.5	1152.29	793.732	1277	678.64	1389.59	809.655	1273.1	665.651	1365.52
ENSMUSG00000004085	76.7121	79.12	107.689	43.9213	47.7861	43.2411	45.9476	61.6599	61.7665	110.239	182.627	144.204	121.185	87.8405	44.9828	56.458	139.564	79.12	43.9213	61.6599	132.695
ENSMUSG00000004096	390.396	571.526	462.575	156.165	150.351	146.819	315.742	399.273	263.622	698.181	727.863	479.806	577.17	474.832	151.112	326.212	620.755	462.575	150.351	315.742	637.675
ENSMUSG00000004098	788.388	780.03	667.347	68.322	146.855	38.2131	3210.44	2711.01	3725.09	515.98	456.127	374.93	505.28	745.255	84.4633	3215.52	463.079	780.03	68.322	3210.44	480.704
ENSMUSG00000004099	116.967	96.8057	112.584	129.812	151.517	126.707	149.624	176.893	121.623	104.115	153.513	108.808	129.401	108.786	136.012	149.38	123.959	112.584	129.812	149.624	119.105
ENSMUSG00000004100	114.688	136.831	88.9253	216.678	79.255	122.684	173.187	141.514	109.524	136.268	151.748	133.716	100.645	113.482	139.539	141.409	130.594	114.688	122.684	141.514	134.992
ENSMUSG00000004105	154.184	163.825	152.56	312.329	156.179	144.808	69.5105	191.045	89.7843	349.09	386.429	285.786	316.314	156.856	204.439	116.78	334.405	154.184	156.179	89.7843	332.702
ENSMUSG00000004110	0.759526	0.930824	0	0	2.33103	0	9.42515	9.09736	10.1883	1.5311	0	0	0	0.56345	0.77701	9.57027	0.382774	0.759526	0	9.42515	0
ENSMUSG00000004113	0	0	0	0	0	1.00561	0	0	0	0	0	0	0	0	0.335203	0	0	0	0	0	0
ENSMUSG00000004127	39.4953	34.4405	23.659	17.5685	17.4827	19.1066	4.71257	28.3029	24.834	21.4354	38.8193	30.1517	52.3766	32.5316	18.0526	19.2831	35.6958	34.4405	17.5685	24.834	34.4855
ENSMUSG00000004151	5.31668	1.86165	2.44748	1.95206	3.49654	3.01682	0	2.02164	3.18384	10.7177	3.52903	2.62189	3.08098	3.2086	2.82181	1.73516	4.9874	2.44748	3.01682	2.02164	3.305
ENSMUSG00000004187	97.9788	140.554	116.663	83.9384	74.5929	111.622	88.3608	57.6166	38.8429	169.952	166.747	70.791	78.0514	118.399	90.0513	61.6067	121.385	116.663	83.9384	57.6166	122.399
ENSMUSG00000004207	5987.34	5315	4549.06	6599.9	4124.76	4489.03	6444.45	6130.61	5958.24	7223.72	8922.27	9231.67	8021.84	5283.8	5071.23	6177.76	8349.88	5315	4489.03	6130.61	8472.06
ENSMUSG00000004221	960.8	685.086	797.064	794.487	1530.32	1582.83	523.096	694.432	838.624	342.966	337.023	565.017	725.056	814.317	1302.54	685.384	492.516	797.064	1530.32	694.432	453.992
ENSMUSG00000004231	0	0	0	0	0	1.00561	0	0	0	0	0	0	0	0	0.335203	0	0	0	0	0	0
ENSMUSG00000004233	6.83573	2.79247	12.2374	8.78426	15.1517	12.0673	0	15.1623	10.1883	18.3732	9.70484	3.93284	15.4049	7.28854	12.0011	8.45018	11.8539	6.83573	12.0673	10.1883	12.5549
ENSMUSG00000004263	294.696	471.928	389.966	364.059	202.799	211.178	589.072	551.906	259.165	1301.43	1358.68	369.686	346.096	385.53	259.345	466.714	843.973	389.966	211.178	551.906	835.56
ENSMUSG00000004264	1175.75	1698.75	1310.22	2003.79	1135.21	1358.58	1426.73	1345.4	1221.96	1779.14	2238.29	1851.05	1672.97	1394.91	1499.19	1331.36	1885.36	1310.22	1358.58	1345.4	1815.09
ENSMUSG00000004266	192.92	167.548	177.035	194.23	151.517	166.931	291.001	263.823	245.156	241.913	280.558	314.627	258.802	179.168	170.892	266.66	273.975	177.035	166.931	263.823	269.68
ENSMUSG00000004267	0.759526	2.79247	0	9.76028	3.49654	10.0561	2.35629	1.01082	3.18384	15.311	11.4694	5.24378	7.18895	1.184	7.77097	2.18365	9.80326	0.759526	9.76028	2.35629	9.32915
ENSMUSG00000004268	342.546	365.814	385.071	372.843	320.516	349.952	340.483	320.429	271.263	292.44	235.563	253.012	219.776	364.477	347.77	310.725	250.198	365.814	349.952	320.429	244.288
ENSMUSG00000004270	1374.74	1348.76	1246.59	1192.71	951.06	784.374	1371.36	1286.77	1293.28	1454.54	1582.77	1106.44	1363.85	1323.36	976.047	1317.14	1376.9	1348.76	951.06	1293.28	1409.19
ENSMUSG00000004285	341.787	494.267	335.305	367.963	251.751	173.97	415.885	513.495	400.527	933.97	929.018	930.771	767.163	390.453	264.561	443.302	890.23	341.787	251.751	415.885	929.894
ENSMUSG00000004296	0.759526	0	0	0	0	0	0	0	0.636768	0	0	0	0	0.253175	0	0.212256	0	0	0	0	0
ENSMUSG00000004317	0.759526	6.51577	2.44748	2.92809	26.8068	15.0841	8.247	8.08654	5.09414	4.59329	7.05806	20.9751	27.7288	3.24093	14.9397	7.14256	15.0888	2.44748	15.0841	8.08654	14.0166
ENSMUSG00000004319	532.428	406.77	481.339	345.514	522.15	579.23	458.298	499.344	520.876	356.746	346.727	443.099	522.739	473.512	482.298	492.839	417.328	481.339	522.15	499.344	399.923
ENSMUSG00000004328	2.27858	0	0	3.90411	1.16551	5.02804	0	5.05409	1.9103	6.12439	2.64677	0	2.05398	0.759526	3.36589	2.32146	2.70629	0	3.90411	1.9103	2.35038
ENSMUSG00000004341	25.8239	53.9878	30.1856	23.4247	18.6482	14.0785	0	0	0	0	0	0	0	36.6658	18.7171	0	0	30.1856	18.6482	0	0
ENSMUSG00000004344	0	2.79247	0	0.976028	5.82757	5.02804	0	0	0	0	0	0	0	0.930824	3.94388	0	0	0	5.02804	0	0
ENSMUSG00000004347	0.759526	0	2.44748	0.976028	0	2.01122	0	0	0	0	0.882258	0	2.05398	1.069	0.995748	0	0.734061	0.759526	0.976028	0	0.441129
ENSMUSG00000004356	157.981	113.561	179.482	176.661	304.199	281.57	567.865	553.928	596.652	84.2104	89.9903	99.6318	117.077	150.341	254.144	572.815	97.7274	157.981	281.57	567.865	94.8111
ENSMUSG00000004359	4.55716	0	2.44748	0.976028	1.16551	1.00561	5.89072	2.02164	3.18384	1.5311	1.76452	3.93284	2.05398	2.33488	1.04905	3.69873	2.32061	2.44748	1.00561	3.18384	1.90925
ENSMUSG00000004360	0	0	0	0	1.16551	0	0	0	0	0	0	0	0	0	0.388505	0	0	0	0	0	0
ENSMUSG00000004364	647.116	579.903	677.953	455.805	574.599	533.978	594.962	476.095	646.32	508.324	449.952	521.756	582.305	634.991	521.461	572.459	515.584	647.116	533.978	594.962	515.04
ENSMUSG00000004366	0	0	0	0	0	0	0	0	0	0	0	0	0	0	0	0	0	0	0	0	0
ENSMUSG00000004371	0	0.930824	0	0.976028	1.16551	2.01122	0	0	0	0	0	0	0	0.310275	1.38425	0	0	0	1.16551	0	0
ENSMUSG00000004383	75.9526	61.4344	48.9497	207.894	222.613	224.251	272.151	203.174	232.42	189.856	204.684	199.264	248.532	62.1122	218.253	235.915	210.584	61.4344	222.613	232.42	201.974
ENSMUSG00000004393	223.301	263.423	224.353	305.497	247.089	251.402	278.042	193.066	227.963	434.832	393.487	367.065	397.446	237.025	267.996	233.024	398.207	224.353	251.402	227.963	395.467
ENSMUSG00000004394	798.262	899.176	821.539	800.343	682.991	736.105	1685.92	1664.82	1367.78	675.214	884.905	811.475	804.135	839.659	739.813	1572.84	793.932	821.539	736.105	1664.82	807.805
ENSMUSG00000004415	0	0	0	21.4726	13.9862	7.03926	0	3.03245	4.45738	0	0	0	0	0	14.166	2.49661	0	0	13.9862	3.03245	0
ENSMUSG00000004446	133.677	174.995	139.507	96.6268	69.9309	67.3757	93.0733	58.6274	73.2283	341.435	370.548	211.062	268.045	149.393	77.9778	74.9764	297.773	139.507	69.9309	73.2283	304.74
ENSMUSG00000004451	129.119	195.473	132.98	121.028	131.703	123.69	202.641	176.893	204.403	130.143	113.811	165.179	116.05	152.524	125.473	194.645	131.296	132.98	123.69	202.641	123.097
ENSMUSG00000004455	37.9763	27.9247	36.7123	15.6165	20.9793	26.1458	55.3727	41.4435	45.2105	159.234	138.514	208.44	214.641	34.2044	20.9138	47.3423	180.208	36.7123	20.9793	45.2105	183.837
ENSMUSG00000004460	593.19	569.664	642.057	435.309	667.84	649.623	499.533	434.652	532.338	316.937	408.485	495.537	475.497	601.637	584.257	488.841	424.114	593.19	649.623	499.533	441.991
ENSMUSG00000004462	208.11	211.297	292.066	170.805	206.296	187.043	192.037	174.871	228.6	479.234	492.3	443.099	384.095	237.158	188.048	198.503	449.682	211.297	187.043	192.037	461.167
ENSMUSG00000004473	12.9119	23.2706	19.5799	32.2089	8.1586	19.1066	36.5224	18.1947	11.4618	15.311	16.7629	10.4876	13.3509	18.5875	19.8247	22.0597	13.9781	19.5799	19.1066	18.1947	14.3309
ENSMUSG00000004500	42.5335	54.9186	58.7396	44.8973	85.0825	51.286	43.5913	106.136	66.2239	94.9281	81.1677	79.9676	74.9704	52.0639	60.422	71.9837	82.7585	54.9186	51.286	66.2239	80.5677
ENSMUSG00000004508	25.8239	25.1322	22.8432	39.0411	38.462	39.2187	14.1377	39.4219	28.6546	32.1531	39.7016	26.2189	33.8907	24.5998	38.9073	27.4047	32.9911	25.1322	39.0411	28.6546	33.0219
ENSMUSG00000004530	243.048	211.297	241.485	256.695	237.765	206.15	275.686	344.689	291.003	241.913	223.211	260.878	215.668	231.943	233.537	303.792	235.418	241.485	237.765	291.003	232.562
ENSMUSG00000004535	1562.34	1251.03	1602.29	1522.6	1726.13	1781.94	1303.03	1321.14	1626.94	964.592	1080.77	1196.89	1114.29	1471.89	1676.89	1417.04	1089.13	1562.34	1726.13	1321.14	1097.53
ENSMUSG00000004540	0	0.930824	0	0	0	0	0	0	0	0	0	0	0	0.310275	0	0	0	0	0	0	0
ENSMUSG00000004542	0	0	0	0	0	0	0	0	0	0	0	0	0	0	0	0	0	0	0	0	0
ENSMUSG00000004552	8.35479	1.86165	0.815828	13.6644	8.1586	7.03926	7.06886	6.06491	12.0986	1.5311	1.76452	2.62189	0	3.67742	9.62075	8.41079	1.47938	1.86165	8.1586	7.06886	1.64781
ENSMUSG00000004558	10848.3	13259.6	12074.3	16654.9	11028.1	13254.9	5455.98	4887.3	9939.31	16091.8	19908.1	18345.4	15479.9	12060.7	13646	6760.87	17456.3	12074.3	13254.9	5455.98	17218.6
ENSMUSG00000004561	107.853	141.485	132.98	180.565	109.558	164.92	175.543	151.623	115.892	319.999	365.255	218.928	227.992	127.439	151.681	147.686	283.044	132.98	164.92	151.623	273.996
ENSMUSG00000004562	85.8264	92.1516	61.1871	231.319	203.965	237.323	140.199	147.579	136.905	71.9616	58.229	40.6393	49.2956	79.7217	224.202	141.561	55.0314	85.8264	231.319	140.199	53.7623
ENSMUSG00000004565	201.274	253.184	216.194	258.648	384.62	363.024	226.204	262.813	265.532	511.387	487.889	558.463	634.681	223.551	335.431	251.516	548.105	216.194	363.024	262.813	534.925
ENSMUSG00000004567	357.737	389.084	325.515	417.74	340.33	304.699	295.714	278.986	250.887	1001.34	962.543	989.763	939.698	357.445	354.257	275.195	973.336	357.737	340.33	278.986	976.153
ENSMUSG00000004568	275.708	265.285	304.304	345.514	319.351	366.041	242.698	223.391	287.182	261.818	222.329	287.097	365.609	281.766	343.635	251.09	284.213	275.708	345.514	242.698	274.457
ENSMUSG00000004591	445.842	349.059	393.229	258.648	374.13	356.991	283.933	262.813	339.397	139.33	133.221	171.734	193.075	396.043	329.923	295.381	159.34	393.229	356.991	283.933	155.532
ENSMUSG00000004609	5.31668	3.7233	1.63166	5.85617	3.49654	2.01122	0	7.07572	3.82061	1.5311	2.64677	5.24378	2.05398	3.55721	3.78798	3.63211	2.86891	3.7233	3.49654	3.82061	2.35038
ENSMUSG00000004610	1769.7	2314.96	1898.43	2278.05	1620.06	1613	1928.62	1300.92	1763.85	2060.86	2096.24	2876.21	2538.72	1994.36	1837.04	1664.46	2393.01	1898.43	1620.06	1763.85	2317.48
ENSMUSG00000004612	4.55716	1.86165	4.07914	1.95206	1.16551	0	9.42515	12.1298	5.09414	4.59329	5.29355	3.93284	7.18895	3.49931	1.03919	8.88303	5.25216	4.07914	1.16551	9.42515	4.94342
ENSMUSG00000004613	0	0	0	0	0	0	0	0	0	0	0	0	0	0	0	0	0	0	0	0	0
ENSMUSG00000004626	301.532	303.449	243.117	344.538	272.73	272.52	246.232	220.358	231.784	370.526	323.789	351.333	290.639	282.699	296.596	232.791	334.072	301.532	272.73	231.784	337.561
ENSMUSG00000004630	0	0	0.815828	0	2.33103	1.00561	0	0	0	0	1.76452	6.55473	1.02699	0.271943	1.11221	0	2.33656	0	1.00561	0	1.39575
ENSMUSG00000004631	58.4835	42.8179	48.1339	42.9452	44.2895	42.2355	98.9641	40.4327	32.4752	26.0287	25.5855	11.7985	19.5129	49.8118	43.1568	57.2906	20.7314	48.1339	42.9452	40.4327	22.5492
ENSMUSG00000004633	247.605	234.568	201.51	268.408	228.441	264.475	362.868	233.499	218.411	241.913	233.798	225.483	199.236	227.894	253.775	271.593	225.108	234.568	264.475	233.499	229.64
ENSMUSG00000004637	69.8764	44.6795	70.977	57.5857	38.462	36.2019	38.8787	53.5733	49.6679	73.4927	59.9935	82.5895	53.4036	61.8443	44.0832	47.3733	67.3698	69.8764	38.462	49.6679	66.7431
ENSMUSG00000004642	24.3048	17.6857	12.2374	18.5445	20.9793	19.1066	21.2066	51.5517	24.834	24.4976	26.4677	17.0423	22.5938	18.076	19.5434	32.5307	22.6504	17.6857	19.1066	24.834	23.5457
ENSMUSG00000004651	0	0	0	0	0	0	0	0	0	0	0	0	0	0	0	0	0	0	0	0	0
ENSMUSG00000004654	0.759526	0	1.63166	0	0	0	0	0	0.636768	7.65549	6.17581	2.62189	3.08098	0.797061	0	0.212256	4.88354	0.759526	0	0	4.62839
ENSMUSG00000004655	986.624	882.421	881.094	1520.65	1244.77	945.271	643.266	681.291	1086.33	344.497	521.414	447.032	438.526	916.713	1236.9	803.628	437.867	882.421	1244.77	681.291	442.779
ENSMUSG00000004661	9.11431	9.30824	10.6058	15.6165	20.9793	9.05047	3.53443	7.07572	6.36768	18.3732	17.6452	11.7985	15.4049	9.6761	15.2154	5.65928	15.8054	9.30824	15.6165	6.36768	16.525
ENSMUSG00000004665	52.4073	45.6104	59.5554	52.7055	47.7861	26.1458	121.349	68.7356	56.0356	84.2104	74.9919	69.4801	58.5386	52.5244	42.2125	82.04	71.8052	52.4073	47.7861	68.7356	72.236
ENSMUSG00000004667	187.603	289.486	216.194	435.309	182.986	235.312	325.168	264.834	230.51	486.889	529.355	365.754	334.799	231.095	284.536	273.504	429.199	216.194	235.312	264.834	426.321
ENSMUSG00000004668	0	0	0	0	0	0	0	1.01082	0	0	0	0	1.02699	0	0	0.336939	0.256748	0	0	0	0
ENSMUSG00000004677	332.672	294.14	303.488	374.795	390.447	431.406	333.415	498.333	394.159	442.487	454.363	401.149	371.771	310.1	398.883	408.636	417.443	303.488	390.447	394.159	421.818
ENSMUSG00000004698	6.07621	1.86165	7.34245	2.92809	2.33103	0	0	0	5.09414	7.65549	9.70484	7.86567	10.2699	5.09344	1.75304	1.69805	8.87398	6.07621	2.33103	0	8.78525
ENSMUSG00000004707	15.95	0.930824	17.9482	10.7363	8.1586	7.03926	16.494	19.2055	10.8251	6.12439	4.41129	6.55473	9.24293	11.6097	8.64472	15.5082	6.58333	15.95	8.1586	16.494	6.33956
ENSMUSG00000004709	1.51905	1.86165	1.63166	3.90411	4.66206	2.01122	0	4.04327	3.18384	1.5311	3.52903	3.93284	2.05398	1.67079	3.5258	2.40904	2.76174	1.63166	3.90411	3.18384	2.79151
ENSMUSG00000004730	85.0669	40.9562	80.767	30.2569	37.2965	24.1346	55.3727	95.0169	99.3358	45.9329	12.3516	32.7736	39.0257	68.93	30.5626	83.2418	32.521	80.767	30.2569	95.0169	35.8997
ENSMUSG00000004748	309.127	377.914	307.567	189.35	194.641	183.021	161.406	272.921	197.398	379.712	373.195	414.259	349.177	331.536	189.004	210.575	379.086	309.127	189.35	197.398	376.454
ENSMUSG00000004768	85.0669	65.1577	118.295	22.4487	38.462	28.157	139.021	117.255	155.371	64.3061	59.1113	77.3458	92.4293	89.5065	29.6892	137.216	73.2981	85.0669	28.157	139.021	70.8259
ENSMUSG00000004771	526.351	499.852	623.293	399.196	411.427	476.658	404.103	445.771	576.912	538.946	463.185	568.95	562.792	549.832	429.093	475.595	533.468	526.351	411.427	445.771	550.869
ENSMUSG00000004788	185.324	214.089	158.271	207.894	157.344	133.746	213.244	371.981	220.322	342.966	405.839	251.701	257.775	185.895	166.328	268.516	314.57	185.324	157.344	220.322	300.37
ENSMUSG00000004789	2130.47	2247.01	2263.92	3130.12	2455.74	2755.37	1866.18	1791.17	2682.7	3584.3	3462.86	3282.61	3445.56	2213.8	2780.41	2113.35	3443.83	2247.01	2755.37	1866.18	3454.21
ENSMUSG00000004791	0	0	0	0	0	1.00561	0	0	2.54707	0	0.882258	0	0	0	0.335203	0.849024	0.220564	0	0	0	0
ENSMUSG00000004798	903.076	674.847	844.382	465.566	681.826	640.572	799.959	818.762	1084.42	835.979	741.979	1139.21	962.292	807.435	595.988	901.046	919.865	844.382	640.572	818.762	899.136
ENSMUSG00000004814	12.1524	8.37741	15.5007	14.6404	11.6551	11.0617	17.6722	28.3029	36.9325	13.7799	4.41129	7.86567	9.24293	12.0102	12.4524	27.6359	8.82494	12.1524	11.6551	28.3029	8.5543
ENSMUSG00000004815	248.365	160.102	246.38	391.387	402.102	470.625	234.451	247.65	325.388	127.081	108.518	154.692	154.049	218.282	421.371	269.163	136.085	246.38	402.102	247.65	140.565
ENSMUSG00000004821	0	0	0	0	0	0	0	0	0	0	0	0	0	0	0	0	0	0	0	0	0
ENSMUSG00000004837	30.381	35.3713	26.9223	22.4487	17.4827	26.1458	48.3039	37.4003	28.6546	38.2774	23.821	36.7065	27.7288	30.8916	22.0257	38.1196	31.6334	30.381	22.4487	37.4003	32.2176
ENSMUSG00000004842	0	0	0.815828	0.976028	0	0	0	0	0	0	0	0	0	0.271943	0.325343	0	0	0	0	0	0
ENSMUSG00000004843	307.608	292.279	337.753	215.702	236.599	222.239	320.455	261.802	323.478	117.895	104.106	162.557	171.508	312.547	224.847	301.912	139.016	307.608	222.239	320.455	140.226
ENSMUSG00000004846	238.491	244.807	211.299	323.065	237.765	255.424	298.07	288.083	247.066	342.966	337.905	285.786	254.694	231.532	272.085	277.74	305.338	238.491	255.424	288.083	311.845
ENSMUSG00000004849	252.163	329.512	221.905	275.24	184.151	195.088	590.25	332.559	320.294	410.334	430.542	420.813	410.797	267.86	218.16	414.368	418.122	252.163	195.088	332.559	415.805
ENSMUSG00000004864	2.27858	2.79247	0	5.85617	2.33103	2.01122	0	1.01082	0.636768	1.5311	0.882258	1.31095	1.02699	1.69035	3.39947	0.549195	1.18782	2.27858	2.33103	0.636768	1.16897
ENSMUSG00000004865	255.96	269.939	239.853	240.103	280.889	360.008	391.144	378.046	485.217	214.354	180.863	175.667	235.181	255.251	293.667	418.136	201.516	255.96	280.889	391.144	197.608
ENSMUSG00000004872	0	0	0.815828	0	0	0	0	0	0	0	0	0	0	0.271943	0	0	0	0	0	0	0
ENSMUSG00000004880	158.741	173.133	179.482	104.435	115.386	123.69	110.745	95.0169	147.73	55.1195	32.6435	61.6144	59.5655	170.452	114.504	117.831	52.2358	173.133	115.386	110.745	57.3425
ENSMUSG00000004885	0	0	0	0	0	1.00561	0	2.02164	0	0	0	0	0	0	0.335203	0.673878	0	0	0	0	0
ENSMUSG00000004891	40.2549	31.648	30.1856	11.7123	17.4827	10.0561	4.71257	31.3353	11.4618	3.0622	12.3516	7.86567	6.16195	34.0295	13.0837	15.8366	7.36036	31.648	11.7123	11.4618	7.01381
ENSMUSG00000004892	0	1.86165	0	0	0	0	0	0	0	0	0	0	0	0.620549	0	0	0	0	0	0	0
ENSMUSG00000004894	0	0	0	0	0	0	0	0	0	0	0	0	0	0	0	0	0	0	0	0	0
ENSMUSG00000004895	302.291	290.417	212.931	302.569	209.793	215.2	309.852	277.975	246.429	395.023	379.371	297.585	249.559	268.546	242.52	278.085	330.384	290.417	215.2	277.975	338.478
ENSMUSG00000004896	116.967	109.837	95.4519	126.884	103.731	98.5496	154.337	131.406	77.6857	105.646	115.576	121.918	99.6182	107.419	109.721	121.143	110.689	109.837	103.731	131.406	110.611
ENSMUSG00000004897	1839.57	2428.52	1790.74	1193.68	1041.97	926.165	2345.68	2056	1967.61	1626.03	1896.85	1480.06	1111.21	2019.61	1053.94	2123.1	1528.54	1839.57	1041.97	2056	1553.04
ENSMUSG00000004902	6.07621	0.930824	3.26331	6.8322	6.99309	9.05047	3.53443	4.04327	1.9103	1.5311	0.882258	1.31095	2.05398	3.42345	7.62525	3.16267	1.44457	3.26331	6.99309	3.53443	1.42102
ENSMUSG00000004929	73.674	82.8433	57.108	173.733	139.862	127.712	160.228	118.266	105.703	84.2104	112.047	108.808	81.1324	71.2084	147.102	128.066	96.5495	73.674	139.862	118.266	96.5094
ENSMUSG00000004931	309.887	326.719	225.169	425.548	283.22	354.98	563.153	435.662	225.416	594.066	601.7	368.376	387.176	287.258	354.583	408.077	487.829	309.887	354.98	435.662	490.621
ENSMUSG00000004933	0.759526	1.86165	1.63166	3.90411	1.16551	1.00561	16.494	7.07572	7.00445	6.12439	2.64677	0	2.05398	1.41761	2.02508	10.1914	2.70629	1.63166	1.16551	7.07572	2.35038
ENSMUSG00000004934	111.65	149.863	104.426	162.021	104.896	117.656	170.831	106.136	94.8784	151.579	166.747	97.0099	108.861	121.98	128.191	123.948	131.049	111.65	117.656	106.136	130.22
ENSMUSG00000004936	488.375	467.274	539.262	436.285	430.075	458.557	546.659	717.681	663.512	378.181	369.666	429.99	567.927	498.304	441.639	642.617	436.441	488.375	436.285	663.512	404.086
ENSMUSG00000004937	726.107	873.113	633.898	776.919	452.22	489.731	811.741	798.546	635.495	1543.35	1629.53	1271.62	1113.26	744.373	572.956	748.594	1389.44	726.107	489.731	798.546	1407.48
ENSMUSG00000004939	0	0	0	0	0	0	0	0	0	0	0	0	0	0	0	0	0	0	0	0	0
ENSMUSG00000004945	333.432	281.109	203.957	292.809	262.241	255.424	322.811	241.585	220.959	206.698	170.276	148.137	142.752	272.833	270.158	261.785	166.966	281.109	262.241	241.585	159.206
ENSMUSG00000004947	38.7358	53.9878	49.7655	77.1062	43.124	53.2972	51.8383	54.5842	41.3899	93.397	140.279	82.5895	99.6182	47.4964	57.8425	49.2708	103.971	49.7655	53.2972	51.8383	96.5076
ENSMUSG00000004948	0	0	0	0	0	0	0	0	0.636768	0	0	0	0	0	0	0.212256	0	0	0	0	0
ENSMUSG00000004951	128.36	139.624	152.56	12.6884	9.32411	8.04486	34.1662	88.952	17.8295	61.2439	71.4629	23.597	48.2686	140.181	10.0191	46.9825	51.1431	139.624	9.32411	34.1662	54.7563
ENSMUSG00000004952	13.6715	12.1007	23.659	18.5445	10.4896	6.03365	69.5105	16.1731	33.1119	6.12439	11.4694	9.17662	17.4589	16.4771	11.6893	39.5985	11.0573	13.6715	10.4896	33.1119	10.323
ENSMUSG00000004961	1.51905	1.86165	0	0.976028	1.16551	2.01122	0	2.02164	1.27354	0	1.76452	0	1.02699	1.1269	1.38425	1.09839	0.697877	1.51905	1.16551	1.27354	0.513496
ENSMUSG00000004980	3106.46	3707.47	3384.87	2716.29	3229.64	3345.66	1662.36	2238.96	2420.99	1446.89	1790.98	1971.66	1803.4	3399.6	3097.19	2107.44	1753.23	3384.87	3229.64	2238.96	1797.19
ENSMUSG00000004988	0.759526	0	0	0	0	1.00561	0	1.01082	0.636768	0	0	0	0	0.253175	0.335203	0.549195	0	0	0	0.636768	0
ENSMUSG00000004994	51.6478	62.3652	51.3972	66.3699	52.4481	58.3253	43.5913	73.7897	56.0356	71.9616	67.0516	60.3035	55.4576	55.1367	59.0478	57.8055	63.6936	51.6478	58.3253	56.0356	63.6775
ENSMUSG00000004996	163.298	227.121	157.455	156.165	104.896	72.4038	281.576	161.731	175.111	139.33	140.279	192.709	184.859	182.625	111.155	206.139	164.294	163.298	104.896	175.111	162.569
ENSMUSG00000005034	581.037	479.374	549.868	475.326	512.826	456.546	408.816	415.446	475.029	410.334	408.485	453.587	490.902	536.76	481.566	433.097	440.827	549.868	475.326	415.446	431.961
ENSMUSG00000005043	62.2811	72.6043	88.1094	165.925	116.551	138.774	194.394	216.315	249.613	124.019	73.2274	73.4129	113.996	74.3316	140.417	220.107	96.1638	72.6043	138.774	216.315	93.7045
ENSMUSG00000005045	0.759526	0	0	0.976028	0	0	0	1.01082	0	0	0	0	0	0.253175	0.325343	0.336939	0	0	0	0	0
ENSMUSG00000005054	239.251	341.612	250.459	184.469	214.455	164.92	432.379	573.134	419.63	477.702	389.958	422.124	404.635	277.107	187.948	475.047	423.605	250.459	184.469	432.379	413.38
ENSMUSG00000005057	7.59526	15.824	12.2374	10.7363	13.9862	7.03926	16.494	31.3353	16.556	16.8421	12.3516	18.3532	6.16195	11.8856	10.5872	21.4618	13.4272	12.2374	10.7363	16.556	14.5968
ENSMUSG00000005069	1828.94	1523.76	1575.36	1723.67	1586.27	1467.18	1933.33	1303.95	1678.52	1074.83	1275.74	1674.08	1686.32	1642.69	1592.37	1638.6	1427.74	1575.36	1586.27	1678.52	1474.91
ENSMUSG00000005078	159.5	162.894	163.981	190.326	127.041	123.69	210.888	161.731	157.918	199.043	134.103	140.271	185.886	162.125	147.019	176.846	164.826	162.894	127.041	161.731	163.078
ENSMUSG00000005087	71.3954	36.3021	52.213	37.0891	32.6344	27.1514	40.0569	49.5301	82.7798	79.6171	88.2258	65.5473	96.5373	53.3035	32.2916	57.4556	82.4818	52.213	32.6344	49.5301	83.9214
ENSMUSG00000005089	1772.73	1348.76	1477.46	1838.84	1762.26	1777.91	435.913	568.08	745.019	587.942	668.752	612.211	457.012	1532.99	1793	583.004	581.479	1477.46	1777.91	568.08	600.076
ENSMUSG00000005102	111.65	59.5727	97.0835	115.171	156.179	137.768	58.9072	82.887	91.6946	99.5214	87.3435	115.363	86.2673	89.4355	136.373	77.8296	97.1238	97.0835	137.768	82.887	93.4324
ENSMUSG00000005103	508.123	551.048	552.316	473.374	391.613	385.148	633.841	493.279	589.01	499.138	526.708	551.908	537.117	537.162	416.711	572.044	528.718	551.048	391.613	589.01	531.912
ENSMUSG00000005107	449.639	334.166	456.864	1270.79	867.143	892.98	854.154	877.39	1072.32	1408.61	1208.69	1186.41	1112.23	413.556	1010.3	934.62	1228.99	449.639	892.98	877.39	1197.55
ENSMUSG00000005124	15.95	16.7548	15.5007	9.76028	9.32411	3.01682	23.5629	26.2813	15.2824	3.0622	13.2339	19.6642	27.7288	16.0685	7.36707	21.7089	15.9223	15.95	9.32411	23.5629	16.449
ENSMUSG00000005125	107.853	237.36	203.141	61.4898	62.9378	48.2692	130.774	63.6815	54.7621	531.291	708.453	235.97	631.6	182.785	57.5656	83.0725	526.829	203.141	61.4898	63.6815	581.446
ENSMUSG00000005131	0	0.930824	1.63166	0	0	2.01122	0	0	1.27354	0	0	0	0	0.85416	0.670405	0.424512	0	0.930824	0	0	0
ENSMUSG00000005142	904.595	888.937	952.887	1130.24	717.957	700.909	1625.84	1297.89	1284.36	849.759	795.797	651.54	641.87	915.473	849.702	1402.7	734.741	904.595	717.957	1297.89	723.668
ENSMUSG00000005148	0	0.930824	0.815828	2.92809	1.16551	1.00561	0	0	0.636768	4.59329	1.76452	3.93284	2.05398	0.582217	1.69974	0.212256	3.08616	0.815828	1.16551	0	2.99341
ENSMUSG00000005150	114.688	121.938	95.4519	129.812	97.9032	104.583	157.871	213.283	134.358	194.449	187.039	205.818	200.263	110.693	110.766	168.504	196.892	114.688	104.583	157.871	197.356
ENSMUSG00000005161	485.337	665.539	536.815	511.439	376.461	415.316	521.918	353.786	485.854	497.607	387.311	458.831	481.659	562.564	434.405	453.853	456.352	536.815	415.316	485.854	470.245
ENSMUSG00000005198	624.33	718.596	642.057	634.418	657.35	633.533	308.674	880.422	480.123	2729.95	1602.18	693.49	590.521	661.661	641.767	556.406	1404.03	642.057	634.418	480.123	1147.84
ENSMUSG00000005202	0	0	0	0	1.16551	0	0	0	0	0	0	0	0	0	0.388505	0	0	0	0	0	0
ENSMUSG00000005204	166.336	280.178	198.246	184.469	151.517	183.021	190.859	220.358	211.407	122.488	104.106	120.607	103.726	214.92	173.002	207.541	112.732	198.246	183.021	211.407	112.357
ENSMUSG00000005220	3.79763	0.930824	3.26331	21.4726	31.4689	24.1346	8.247	2.02164	5.73091	0	0	0	0	2.66392	25.692	5.33318	0	3.26331	24.1346	5.73091	0
ENSMUSG00000005225	240.01	205.712	344.279	177.637	347.323	313.75	217.957	197.109	236.878	67.3683	55.5822	70.791	78.0514	263.334	279.57	217.315	67.9482	240.01	313.75	217.957	69.0797
ENSMUSG00000005232	1.51905	0	0	1.95206	2.33103	1.00561	0	1.01082	3.82061	0	0	0	0	0.506351	1.7629	1.61048	0	0	1.95206	1.01082	0
ENSMUSG00000005233	69.1169	30.7172	42.4231	28.3048	29.1379	22.1234	4.71257	9.09736	14.6457	22.9665	16.7629	14.4204	37.9987	47.419	26.522	9.4852	23.0371	42.4231	28.3048	9.09736	19.8647
ENSMUSG00000005237	3.79763	0	4.07914	4.88014	1.16551	4.02243	7.06886	15.1623	1.9103	1.5311	0.882258	0	1.02699	2.62559	3.35603	8.04714	0.860087	3.79763	4.02243	7.06886	0.954625
ENSMUSG00000005251	42.5335	48.4028	45.6864	88.8186	69.9309	99.5552	163.762	95.0169	173.838	53.5884	71.4629	74.7239	57.5116	45.5409	86.1015	144.205	64.3217	45.6864	88.8186	163.762	64.4872
ENSMUSG00000005262	274.189	311.826	310.015	191.302	221.448	206.15	202.641	236.531	223.506	662.965	639.637	436.545	538.144	298.677	206.3	220.893	569.323	310.015	206.15	223.506	588.89
ENSMUSG00000005267	1.51905	0	0	1.95206	0	1.00561	0	0	0.636768	3.0622	0.882258	2.62189	1.02699	0.506351	0.985888	0.212256	1.89833	0	1.00561	0	1.82444
ENSMUSG00000005268	701.042	1018.32	1094.84	975.052	1110.74	839.683	135.487	289.094	417.083	506.793	389.076	395.905	429.283	938.068	975.157	280.554	430.264	1018.32	975.052	289.094	412.594
ENSMUSG00000005299	910.672	844.257	894.148	1122.43	903.274	950.3	1188.75	1113.92	1229.6	982.965	1068.41	1178.54	1287.85	883.025	992.002	1177.42	1129.44	894.148	950.3	1188.75	1123.48
ENSMUSG00000005312	2155.53	2004.99	2232.92	1428.91	1991.86	2120.83	1621.13	1467.71	1824.98	1777.6	1737.17	1427.62	1678.11	2131.15	1847.2	1637.94	1655.12	2155.53	1991.86	1621.13	1707.64
ENSMUSG00000005320	610.659	848.911	624.108	1038.49	672.502	795.436	1519.81	757.102	914.399	760.956	731.392	563.706	453.931	694.56	835.477	1063.77	627.496	624.108	795.436	914.399	647.549
ENSMUSG00000005338	79.7502	56.7803	53.0288	130.788	124.71	92.5159	160.228	150.612	134.995	145.454	124.398	110.119	90.3753	63.1864	116.005	148.611	117.587	56.7803	124.71	150.612	117.259
ENSMUSG00000005339	0	0	0	0	0	0	0	0	0	0	0	0	0	0	0	0	0	0	0	0	0
ENSMUSG00000005354	1946.67	2560.7	2217.42	2648.94	1720.3	1748.75	1746.01	1915.5	1645.41	3964.01	4533.92	3274.74	3303.83	2241.59	2039.33	1768.97	3769.13	2217.42	1748.75	1746.01	3633.92
ENSMUSG00000005355	0	0	0	0	0	0	0	0	0	0	0	0	0	0	0	0	0	0	0	0	0
ENSMUSG00000005357	0	0	0.815828	0.976028	1.16551	0	0	0	0	0	0	0	0	0.271943	0.713848	0	0	0	0.976028	0	0
ENSMUSG00000005360	3.0381	0	3.26331	1.95206	4.66206	3.01682	3.53443	6.06491	10.1883	4.59329	0.882258	3.93284	4.10797	2.10047	3.21031	6.59588	3.37909	3.0381	3.01682	6.06491	4.0204
ENSMUSG00000005362	186.084	161.033	183.561	178.613	201.634	197.099	189.681	175.882	196.761	142.392	172.923	245.147	252.64	176.893	192.449	187.442	203.275	183.561	197.099	189.681	209.035
ENSMUSG00000005364	0	0	0	0	0	0	0	0	0	0	0	0	0	0	0	0	0	0	0	0	0
ENSMUSG00000005370	182.286	130.315	172.14	127.86	162.006	128.718	91.8952	138.482	108.887	105.646	77.6387	77.3458	74.9704	161.58	139.528	113.088	83.9002	172.14	128.718	108.887	77.4922
ENSMUSG00000005371	280.265	285.763	322.252	180.565	264.572	265.481	157.871	171.839	212.681	154.641	125.281	186.154	188.967	296.093	236.873	180.797	163.761	285.763	264.572	171.839	170.398
ENSMUSG00000005373	4778.94	5125.12	4881.1	7567.15	4856.7	6213.65	4500.51	5598.92	4238.33	5867.17	5120.62	1928.4	2023.17	4928.38	6212.5	4779.25	3734.84	4881.1	6213.65	4500.51	3571.9
ENSMUSG00000005374	160.26	179.649	206.404	525.103	382.289	417.327	395.856	282.018	399.89	309.282	307.026	309.383	289.612	182.104	441.573	359.255	303.826	179.649	417.327	395.856	308.154
ENSMUSG00000005378	120.005	161.033	107.689	113.219	73.4274	101.566	110.745	114.222	69.4077	119.426	119.105	140.271	128.374	129.576	96.071	98.1252	126.794	120.005	101.566	110.745	123.9
ENSMUSG00000005397	148.108	134.969	155.823	115.171	162.006	126.707	50.6602	128.374	71.9548	137.799	156.16	94.388	126.32	146.3	134.628	83.6629	128.667	148.108	126.707	71.9548	132.059
ENSMUSG00000005410	24.3048	26.0631	27.7382	43.9213	41.9585	40.2243	53.0165	53.5733	61.1297	48.9951	29.1145	17.0423	33.8907	26.0354	42.0347	55.9065	32.2607	26.0631	41.9585	53.5733	31.5026
ENSMUSG00000005413	217.224	124.73	172.14	102.483	93.2411	69.3869	221.491	425.554	173.838	228.134	144.69	196.642	215.668	171.365	88.3704	273.628	196.283	172.14	93.2411	221.491	206.155
ENSMUSG00000005417	1004.85	986.673	883.542	1129.26	1080.43	1214.77	713.955	865.26	859	780.86	852.261	747.239	703.49	958.356	1141.49	812.738	770.962	986.673	1129.26	859	764.049
ENSMUSG00000005442	340.268	512.884	354.069	578.785	381.123	433.417	741.052	686.345	510.051	718.085	801.09	460.142	281.396	402.407	464.442	645.816	565.178	354.069	433.417	686.345	589.113
ENSMUSG00000005447	23.5453	29.7864	23.659	37.0891	23.3103	24.1346	60.0853	47.5084	40.7532	162.296	213.506	157.313	135.563	25.6636	28.178	49.449	167.17	23.659	24.1346	47.5084	159.805
ENSMUSG00000005465	12.1524	10.2391	16.3166	35.137	20.9793	17.0953	22.3847	10.1082	19.7398	9.18659	12.3516	7.86567	4.10797	12.9027	24.4039	17.4109	8.37796	12.1524	20.9793	19.7398	8.52613
ENSMUSG00000005469	1010.17	1373.9	1035.29	659.795	650.357	614.426	1114.52	1078.54	906.758	1174.35	1402.79	993.696	1120.45	1139.78	641.526	1033.27	1172.82	1035.29	650.357	1078.54	1147.4
ENSMUSG00000005470	4.55716	4.65412	5.7108	4.88014	4.66206	5.02804	10.6033	11.119	17.8295	70.4305	37.9371	20.9751	37.9987	4.97402	4.85675	13.1839	41.8354	4.65412	4.88014	11.119	37.9679
ENSMUSG00000005474	0	0	0	0	0	0	0	0	0	0	1.76452	0	1.02699	0	0	0	0.697877	0	0	0	0.513496
ENSMUSG00000005481	94.1812	97.7365	119.927	129.812	100.234	110.617	163.762	115.233	149.64	65.8372	73.2274	123.229	73.9434	103.948	113.554	142.879	84.0592	97.7365	110.617	149.64	73.5854
ENSMUSG00000005483	217.224	181.511	218.642	176.661	162.006	273.525	333.415	259.78	264.896	206.698	193.214	146.826	105.78	205.792	204.064	286.03	163.13	217.224	176.661	264.896	170.02
ENSMUSG00000005493	0	0	0	0	1.16551	0	0	1.01082	0	6.12439	1.76452	1.31095	7.18895	0	0.388505	0.336939	4.0972	0	0	0	3.94445
ENSMUSG00000005501	293.937	256.907	292.066	260.6	410.261	403.249	267.439	172.85	262.348	171.483	191.45	275.298	251.613	280.97	358.036	234.212	222.461	292.066	403.249	262.348	221.532
ENSMUSG00000005503	0	0	0	0	0	0	0	0	0	0	0	0	0	0	0	0	0	0	0	0	0
ENSMUSG00000005505	52.4073	25.1322	39.1597	47.8254	31.4689	53.2972	28.2754	35.3786	42.0267	10.7177	27.35	11.7985	26.7018	38.8998	44.1972	35.2269	19.142	39.1597	47.8254	35.3786	19.2502
ENSMUSG00000005506	1344.36	1241.72	1227.82	1135.12	1503.51	1607.97	821.166	855.152	843.718	1012.06	938.722	1055.31	946.887	1271.3	1415.53	840.012	988.244	1241.72	1503.51	843.718	979.471
ENSMUSG00000005510	183.046	236.429	194.983	205.942	208.627	242.352	302.783	418.479	253.434	326.124	214.389	251.701	281.396	204.819	218.974	324.898	268.402	194.983	208.627	302.783	266.549
ENSMUSG00000005514	407.106	330.442	380.176	1274.69	268.068	274.531	508.958	376.024	397.343	1941.43	2227.7	1567.89	789.757	372.575	605.764	427.442	1631.7	380.176	274.531	397.343	1754.66
ENSMUSG00000005533	1.51905	4.65412	2.44748	7.80823	17.4827	22.1234	2.35629	6.06491	4.45738	12.2488	10.5871	11.7985	7.18895	2.87355	15.8048	4.29286	10.4558	2.44748	17.4827	4.45738	11.1928
ENSMUSG00000005534	1313.22	1055.55	1216.4	968.22	1600.25	1490.31	873.004	928.941	989.538	1117.7	1041.06	1358.14	1469.63	1195.06	1352.93	930.494	1246.63	1216.4	1490.31	928.941	1237.92
ENSMUSG00000005540	18.2286	10.2391	4.89497	2.92809	4.66206	2.01122	0	2.02164	2.54707	3.0622	2.64677	9.17662	4.10797	11.1209	3.20045	1.5229	4.74839	10.2391	2.92809	2.02164	3.58508
ENSMUSG00000005547	2612.77	3212.27	4672.25	8699.34	1775.08	2384.3	20.0284	4.04327	13.3721	21560.9	32235.1	9798	10574.9	3499.1	4286.24	12.4813	18542.2	3212.27	2384.3	13.3721	16067.9
ENSMUSG00000005553	5.31668	8.37741	14.6849	7.80823	6.99309	4.02243	15.3159	12.1298	8.27798	3.0622	1.76452	1.31095	2.05398	9.45967	6.27458	11.9079	2.04791	8.37741	6.99309	12.1298	1.90925
ENSMUSG00000005566	647.116	676.709	647.767	1008.24	642.198	771.301	1080.36	684.324	976.165	653.779	852.261	943.88	686.031	657.198	807.246	913.616	783.988	647.767	771.301	976.165	769.146
ENSMUSG00000005575	461.792	627.375	388.334	432.381	263.406	321.795	528.986	340.646	310.106	825.262	629.932	706.599	522.739	492.5	339.194	393.246	671.133	461.792	321.795	340.646	668.266
ENSMUSG00000005580	153.424	134.039	146.033	230.343	254.082	265.481	80.1138	191.045	138.179	102.584	119.987	141.582	73.9434	144.499	249.968	136.446	109.524	146.033	254.082	138.179	111.285
ENSMUSG00000005583	28.862	38.1638	39.1597	23.4247	31.4689	20.1122	45.9476	32.3462	26.1075	4.59329	29.9968	15.7313	13.3509	35.3952	25.0019	34.8004	15.9181	38.1638	23.4247	32.3462	14.5411
ENSMUSG00000005609	265.075	201.058	247.196	324.041	335.668	363.024	444.16	511.474	538.069	251.1	245.268	263.5	292.693	237.776	340.911	497.901	263.14	247.196	335.668	511.474	257.3
ENSMUSG00000005610	4924.01	4250.14	5920.46	4207.66	5141.08	5773.2	5380.58	4875.17	6418.62	3166.31	2974.97	3654.91	3304.86	5031.54	5040.65	5558.13	3275.26	4924.01	5141.08	5380.58	3235.59
ENSMUSG00000005611	23.5453	20.4781	19.5799	46.8494	62.9378	61.3421	175.543	185.99	191.667	26.0287	46.7597	34.0846	19.5129	21.2011	57.0431	184.4	31.5964	20.4781	61.3421	185.99	30.0566
ENSMUSG00000005615	993.46	778.169	911.28	768.134	899.777	847.728	629.129	899.628	950.058	731.865	716.393	764.281	842.134	894.303	838.546	826.271	763.668	911.28	847.728	899.628	748.073
ENSMUSG00000005621	389.637	345.336	371.202	404.076	425.413	569.174	366.403	315.375	286.546	488.42	500.24	402.46	326.584	368.725	466.221	322.774	429.426	371.202	425.413	315.375	445.44
ENSMUSG00000005625	957.003	1130.02	974.099	752.518	630.543	700.909	616.169	1374.71	936.686	1437.7	1978.9	1574.44	2010.85	1020.37	694.657	975.856	1750.48	974.099	700.909	936.686	1776.67
ENSMUSG00000005628	3.79763	3.7233	5.7108	2.92809	5.82757	9.05047	0	1.01082	2.54707	0	0	1.31095	0	4.41057	5.93538	1.18596	0.327736	3.79763	5.82757	1.01082	0
ENSMUSG00000005640	0	0	0	0.976028	0	0	0	2.02164	0	3.0622	1.76452	0	0	0	0.325343	0.673878	1.20668	0	0	0	0.882258
ENSMUSG00000005649	0	0	0	0	1.16551	0	0	0	0	0	0	0	0	0	0.388505	0	0	0	0	0	0
ENSMUSG00000005656	142.791	188.957	165.613	112.243	132.869	121.679	124.883	124.331	109.524	133.206	111.164	121.918	175.616	165.787	122.263	119.579	135.476	165.613	121.679	124.331	127.562
ENSMUSG00000005667	16.7096	13.0315	13.8691	5.85617	6.99309	8.04486	17.6722	7.07572	3.18384	3.0622	0.882258	2.62189	4.10797	14.5367	6.96471	9.31057	2.66858	13.8691	6.99309	7.07572	2.84204
ENSMUSG00000005672	35.6977	28.8555	56.2921	8.78426	24.4758	10.0561	24.741	34.3678	36.2958	91.8659	82.9322	57.6816	53.4036	40.2818	14.4387	31.8015	71.4708	35.6977	10.0561	34.3678	70.3069
ENSMUSG00000005674	322.799	223.398	344.279	594.401	479.026	594.314	134.308	108.157	142.636	133.206	156.16	179.599	143.779	296.825	555.914	128.367	153.186	322.799	594.314	134.308	149.969
ENSMUSG00000005677	915.229	868.459	985.52	1191.73	819.357	954.322	377.006	614.577	597.925	635.406	940.487	749.861	503.226	923.069	988.47	529.836	707.245	915.229	954.322	597.925	692.633
ENSMUSG00000005681	59208.8	95737.1	65520.8	47761	31562.1	35709.1	34772.9	55794.1	61794.5	125311	146978	123764	102407	73488.9	38344.1	50787.2	124615	65520.8	35709.1	55794.1	124537
ENSMUSG00000005682	343.306	319.273	381.808	493.87	550.123	518.894	519.561	490.247	539.343	549.664	516.121	376.241	427.229	348.129	520.962	516.383	467.314	343.306	518.894	519.561	471.675
ENSMUSG00000005683	1765.14	2139.96	1879.67	927.227	1061.78	1023.71	1909.77	2507.84	2268.17	1874.06	2105.95	1651.79	1909.18	1928.26	1004.24	2228.59	1885.25	1879.67	1023.71	2268.17	1891.62
ENSMUSG00000005686	9.87384	9.30824	13.0532	15.6165	10.4896	21.1178	7.06886	3.03245	3.18384	12.2488	7.94032	6.55473	3.08098	10.7451	15.7413	4.42838	7.4562	9.87384	15.6165	3.18384	7.24752
ENSMUSG00000005687	235.453	279.247	240.669	210.822	160.841	177.993	180.256	206.207	187.21	301.626	387.311	306.761	340.961	251.79	183.219	191.224	334.165	240.669	177.993	187.21	323.861
ENSMUSG00000005696	0	0.930824	0	0	0	0	0	0	0	0	0	0	0	0.310275	0	0	0	0	0	0	0
ENSMUSG00000005698	319.001	293.21	371.202	310.377	327.51	365.036	381.719	268.877	331.756	174.545	147.337	179.599	215.668	327.804	334.307	327.451	179.288	319.001	327.51	331.756	177.072
ENSMUSG00000005699	29.6215	48.4028	38.3439	20.4966	19.8137	26.1458	28.2754	25.2704	16.556	41.3396	66.1693	45.8831	42.1067	38.7894	22.152	23.3673	48.8747	38.3439	20.4966	25.2704	43.9949
ENSMUSG00000005705	1.51905	0	0	2.92809	3.49654	4.02243	12.9596	8.08654	2.54707	7.65549	2.64677	0	4.10797	0.506351	3.48235	7.8644	3.60256	0	3.49654	8.08654	3.37737
ENSMUSG00000005716	0	0	0	0	0	0	0	0	0	0	0	0	0	0	0	0	0	0	0	0	0
ENSMUSG00000005718	45.5716	69.8118	47.318	97.6028	69.9309	55.3084	71.8668	64.6923	30.5649	88.8037	122.634	85.2114	69.8355	54.2338	74.2807	55.708	91.6211	47.318	69.9309	64.6923	87.0075
ENSMUSG00000005732	189.122	305.31	236.59	136.644	123.545	139.78	252.123	163.752	196.125	287.846	287.616	165.179	171.508	243.674	133.323	204	228.037	236.59	136.644	196.125	229.562
ENSMUSG00000005763	0	0	0	0	0	0	0	0	0	0	0	0	2.05398	0	0	0	0.513496	0	0	0	0
ENSMUSG00000005774	132.917	159.171	167.245	82.9624	115.386	92.5159	91.8952	94.006	110.798	108.708	104.989	98.3209	124.266	153.111	96.9548	98.8996	109.071	159.171	92.5159	94.006	106.848
ENSMUSG00000005779	970.674	1267.78	970.835	733.973	616.557	647.612	712.777	935.006	610.024	1740.86	1658.64	1476.12	1493.25	1069.76	666.047	752.602	1592.22	970.835	647.612	712.777	1575.95
ENSMUSG00000005800	1.51905	0.930824	0	0	0	0	0	0	0	1.5311	3.52903	3.93284	2.05398	0.816625	0	0	2.76174	0.930824	0	0	2.79151
ENSMUSG00000005802	153.424	96.8057	138.691	92.7227	127.041	124.695	115.458	113.212	162.376	73.4927	38.8193	56.3706	82.1594	129.64	114.82	130.348	62.7105	138.691	124.695	115.458	64.9317
ENSMUSG00000005803	1636.02	1797.42	1966.96	1907.16	1829.86	1731.66	782.287	673.205	922.04	1904.69	2238.29	2114.55	2158.74	1800.13	1822.89	792.511	2104.07	1797.42	1829.86	782.287	2136.65
ENSMUSG00000005804	217.984	163.825	181.93	218.63	217.951	237.323	256.835	246.64	303.102	329.186	299.968	285.786	349.177	187.913	224.635	268.859	316.029	181.93	218.63	256.835	314.577
ENSMUSG00000005813	347.863	324.858	425.862	371.867	409.096	483.697	285.111	293.137	338.124	353.684	348.492	376.241	443.661	366.194	421.553	305.457	380.519	347.863	409.096	293.137	364.962
ENSMUSG00000005823	272.67	252.253	263.512	270.36	296.041	267.492	130.774	118.266	120.986	592.535	685.514	568.95	634.681	262.812	277.964	123.342	620.42	263.512	270.36	120.986	613.608
ENSMUSG00000005824	4.55716	3.7233	0.815828	0	1.16551	1.00561	7.06886	2.02164	0.636768	1.5311	0.882258	5.24378	4.10797	3.03209	0.723707	3.24242	2.94128	3.7233	1.00561	2.02164	2.81953
ENSMUSG00000005836	56.2049	68.881	79.9511	57.5857	67.5998	73.4094	60.0853	38.4111	17.8295	76.5549	74.9919	68.1691	58.5386	68.3457	66.1983	38.7753	69.5636	68.881	67.5998	38.4111	71.5805
ENSMUSG00000005846	496.73	536.155	543.341	293.785	238.93	321.795	302.783	437.684	236.878	704.305	553.176	381.485	467.281	525.409	284.837	325.782	526.562	536.155	293.785	302.783	510.229
ENSMUSG00000005864	0	0	0	0	0	0	0	0	0	0	0	0	0	0	0	0	0	0	0	0	0
ENSMUSG00000005871	311.406	216.882	295.33	214.726	388.116	386.153	243.876	329.527	269.99	347.559	315.848	338.224	367.663	274.539	329.665	281.131	342.324	295.33	386.153	269.99	342.891
ENSMUSG00000005873	151.146	151.724	122.374	357.226	355.482	330.845	365.224	268.877	393.523	38.2774	47.6419	62.9254	64.7005	141.748	347.851	342.542	53.3863	151.146	355.482	365.224	55.2836
ENSMUSG00000005881	606.861	692.533	551.5	892.09	607.233	681.802	959.009	799.557	999.726	891.099	911.372	920.283	732.245	616.965	727.042	919.43	863.75	606.861	681.802	959.009	901.236
ENSMUSG00000005882	240.77	258.769	265.144	250.839	202.799	224.251	240.341	172.85	215.864	410.334	417.308	360.51	365.609	254.894	225.963	209.685	388.44	258.769	224.251	215.864	387.972
ENSMUSG00000005883	0	0	0	0.976028	1.16551	1.00561	0	1.01082	1.9103	0	0	0	0	0	1.04905	0.973707	0	0	1.00561	1.01082	0
ENSMUSG00000005886	522.554	376.984	448.705	497.774	677.164	613.421	285.111	383.1	352.77	376.65	403.192	528.311	439.553	449.414	596.12	340.327	436.926	448.705	613.421	352.77	421.372
ENSMUSG00000005891	0	0	0	0	0	0	0	0	0	0	0	0	0	0	0	0	0	0	0	0	0
ENSMUSG00000005892	0	0	0	0	0	0	0	0	0	0	0	0	0	0	0	0	0	0	0	0	0
ENSMUSG00000005893	41.0144	22.3398	20.3957	40.0172	181.82	157.88	1.17814	60.6491	17.1927	33.6842	36.1726	108.808	95.5103	27.9166	126.573	26.34	68.5439	22.3398	157.88	17.1927	65.8414
ENSMUSG00000005897	238.491	221.536	232.511	152.26	196.972	172.965	225.025	173.861	202.492	156.172	122.634	103.565	126.32	230.846	174.066	200.459	127.173	232.511	172.965	202.492	124.477
ENSMUSG00000005899	157.981	197.335	198.246	177.637	189.979	191.066	242.698	232.488	254.07	263.349	264.677	199.264	236.208	184.521	186.227	243.085	240.875	197.335	189.979	242.698	249.779
ENSMUSG00000005907	258.239	232.706	257.802	205.942	328.675	341.907	342.84	465.987	361.047	199.043	232.034	258.256	298.855	249.582	292.175	389.958	247.047	257.802	328.675	361.047	245.145
ENSMUSG00000005917	0	0	0	0	0	0	0	0	0	0	0	0	0	0	0	0	0	0	0	0	0
ENSMUSG00000005936	395.713	418.871	420.967	574.881	568.771	583.253	559.618	507.43	640.589	159.234	195.861	216.306	248.532	411.85	575.635	569.212	204.983	418.871	574.881	559.618	206.084
ENSMUSG00000005947	5.31668	9.30824	4.89497	7.80823	4.66206	1.00561	0	4.04327	1.9103	0	2.64677	10.4876	6.16195	6.50663	4.49196	1.98452	4.82407	5.31668	4.66206	1.9103	4.40436
ENSMUSG00000005949	185.324	192.681	201.51	214.726	181.82	190.06	206.175	249.672	231.147	217.416	267.324	196.642	199.236	193.171	195.535	228.998	220.155	192.681	190.06	231.147	208.326
ENSMUSG00000005950	0	0.930824	0.815828	3.90411	9.32411	5.02804	0	0	0	3.0622	2.64677	2.62189	3.08098	0.582217	6.08542	0	2.85296	0.815828	5.02804	0	2.85448
ENSMUSG00000005951	798.262	801.439	859.067	895.018	720.288	690.853	493.642	472.052	559.719	623.157	716.393	610.9	526.847	819.589	768.72	508.471	619.324	801.439	720.288	493.642	617.029
ENSMUSG00000005952	0	0.930824	2.44748	0	0	2.01122	7.06886	7.07572	7.64122	4.59329	9.70484	14.4204	17.4589	1.1261	0.670405	7.26193	11.5443	0.930824	0	7.07572	12.0626
ENSMUSG00000005958	2.27858	6.51577	1.63166	8.78426	2.33103	4.02243	0	9.09736	2.54707	7.65549	12.3516	5.24378	9.24293	3.47533	5.04591	3.88148	8.62345	2.27858	4.02243	2.54707	8.44921
ENSMUSG00000005968	75.9526	101.46	48.9497	103.459	75.7584	110.617	49.482	61.6599	59.8562	16.8421	29.1145	22.2861	23.6208	75.454	96.6114	56.9994	22.9659	75.9526	103.459	59.8562	22.9534
ENSMUSG00000005973	63.8002	62.3652	65.2662	92.7227	120.048	61.3421	115.458	116.244	129.264	192.918	178.216	209.751	216.695	63.8105	91.3709	120.322	199.395	63.8002	92.7227	116.244	201.335
ENSMUSG00000005980	18.9881	8.37741	8.97411	1.95206	8.1586	4.02243	9.42515	15.1623	8.91475	4.59329	0.882258	2.62189	1.02699	12.1132	4.71103	11.1674	2.28111	8.97411	4.02243	9.42515	1.82444
ENSMUSG00000005981	1553.99	1238.93	1390.17	1835.91	1642.21	1712.55	1250.01	1015.87	1141.73	2321.14	2673.24	2992.89	2813.96	1394.36	1730.22	1135.87	2700.31	1390.17	1712.55	1141.73	2743.6
ENSMUSG00000005982	169.374	137.762	181.93	228.391	188.813	183.021	153.159	132.417	139.452	359.808	363.49	197.953	177.67	163.022	200.075	141.676	274.73	169.374	188.813	139.452	278.88
ENSMUSG00000005983	0	0.930824	2.44748	1.95206	2.33103	1.00561	0	1.01082	1.9103	13.7799	33.5258	19.6642	19.5129	1.1261	1.7629	0.973707	21.6207	0.930824	1.95206	1.01082	19.5885
ENSMUSG00000005986	3.79763	0	4.89497	4.88014	15.1517	7.03926	0	4.04327	2.54707	1.5311	0	2.62189	2.05398	2.89753	9.02369	2.19678	1.55174	3.79763	7.03926	2.54707	1.79254
ENSMUSG00000005994	0	0	0	0	0	0	0	0	0	0	0	0	0	0	0	0	0	0	0	0	0
ENSMUSG00000006005	499.768	361.16	465.838	440.189	675.998	574.202	386.431	551.906	463.567	411.865	422.602	381.485	392.311	442.255	563.463	467.302	402.066	465.838	574.202	463.567	402.088
ENSMUSG00000006007	0	0	0	0	0	0	0	0	0	0	0	0	0	0	0	0	0	0	0	0	0
ENSMUSG00000006010	388.877	321.134	349.99	258.648	367.137	348.946	320.455	266.856	396.07	209.76	271.735	305.45	323.503	353.334	324.91	327.794	277.612	349.99	348.946	320.455	288.593
ENSMUSG00000006014	211.148	292.279	268.407	416.764	424.247	375.092	170.831	157.688	208.223	355.215	531.119	427.368	457.012	257.278	405.368	178.914	442.678	268.407	416.764	170.831	442.19
ENSMUSG00000006019	106.334	113.561	102.794	225.463	129.372	168.942	81.2919	96.0277	91.0578	111.77	130.574	102.254	87.2943	107.563	174.592	89.4591	107.973	106.334	168.942	91.0578	107.012
ENSMUSG00000006021	138.234	135.9	101.979	121.028	92.0756	75.4206	139.021	108.157	131.174	166.89	185.274	213.684	180.751	125.371	96.1746	126.118	186.65	135.9	92.0756	131.174	183.012
ENSMUSG00000006024	678.257	1026.7	757.088	679.316	428.909	497.776	821.166	716.67	745.019	979.903	1177.81	883.577	785.649	820.681	535.334	760.951	956.736	757.088	497.776	745.019	931.74
ENSMUSG00000006050	555.973	625.514	621.661	435.309	350.82	402.243	445.338	531.69	545.073	466.985	449.952	506.025	468.308	601.049	396.124	507.367	472.817	621.661	402.243	531.69	467.647
ENSMUSG00000006056	0	0	0	0	0	0	0	0	0	0	0	0	0	0	0	0	0	0	0	0	0
ENSMUSG00000006057	160.26	325.788	189.272	283.048	163.172	162.908	352.265	204.185	285.272	581.817	355.55	370.997	403.608	225.107	203.043	280.574	427.993	189.272	163.172	285.272	387.303
ENSMUSG00000006058	134.436	163.825	132.98	207.894	199.303	232.295	151.981	113.212	159.829	522.104	464.95	515.201	525.82	143.747	213.164	141.674	507.019	134.436	207.894	151.981	518.653
ENSMUSG00000006095	185.324	224.329	141.954	105.411	108.393	112.628	114.28	198.12	115.255	206.698	142.926	173.045	172.535	183.869	108.811	142.552	173.801	185.324	108.393	115.255	172.79
ENSMUSG00000006127	186.843	165.687	186.825	235.223	149.186	178.998	207.353	149.601	171.291	128.612	204.684	142.893	168.427	179.785	187.802	176.082	161.154	186.825	178.998	171.291	155.66
ENSMUSG00000006134	304.57	221.536	316.541	280.12	410.261	390.176	308.674	360.862	261.075	251.1	219.682	212.373	238.262	280.882	360.186	310.203	230.354	304.57	390.176	308.674	228.972
ENSMUSG00000006143	0	0	0	0	0	0	0	0	0	0	0	0	0	0	0	0	0	0	0	0	0
ENSMUSG00000006154	12.9119	10.2391	4.07914	1.95206	0	0	0	1.01082	0.636768	1.5311	0.882258	0	2.05398	9.07671	0.650686	0.549195	1.11684	10.2391	0	0.636768	1.20668
ENSMUSG00000006169	667.623	703.703	837.04	590.497	662.012	671.746	840.016	722.735	718.911	790.046	1011.07	743.306	1111.21	736.122	641.418	760.554	913.906	703.703	662.012	722.735	900.557
ENSMUSG00000006179	0	0	0	0	0	0	0	0	0	3.0622	5.29355	5.24378	8.21594	0	0	0	5.45387	0	0	0	5.26866
ENSMUSG00000006191	36.4572	39.0946	60.3713	47.8254	81.586	51.286	95.4296	40.4327	31.8384	48.9951	50.2887	61.6144	42.1067	45.3077	60.2325	55.9002	50.7512	39.0946	51.286	40.4327	49.6419
ENSMUSG00000006200	0	0	0	0	0	0	0	0	0	0	0	0	0	0	0	0	0	0	0	0	0
ENSMUSG00000006204	0	0	0	0	0	0	0	0	0	0	0	0	0	0	0	0	0	0	0	0	0
ENSMUSG00000006205	21.2667	24.2014	17.1324	88.8186	32.6344	39.2187	30.6317	46.4976	18.4663	4.59329	9.70484	9.17662	9.24293	20.8668	53.5572	31.8652	8.17942	21.2667	39.2187	30.6317	9.20977
ENSMUSG00000006215	101.776	131.246	96.2677	178.613	113.055	164.92	110.745	96.0277	80.8695	182.201	179.981	165.179	172.535	109.763	152.196	95.8809	174.974	101.776	164.92	96.0277	176.258
ENSMUSG00000006216	0	0	0	0.976028	0	0	4.71257	1.01082	0.636768	0	0	0	0	0	0.325343	2.12005	0	0	0	1.01082	0
ENSMUSG00000006218	34.1787	37.233	35.0806	73.2021	41.9585	72.4038	1420.84	770.243	859.637	336.842	419.955	382.796	289.612	35.4974	62.5215	1016.91	357.301	35.0806	72.4038	859.637	359.819
ENSMUSG00000006219	14.431	10.2391	21.2115	4.88014	10.4896	9.05047	25.9192	27.2921	19.7398	16.8421	29.9968	10.4876	10.2699	15.2939	8.14008	24.317	16.8991	14.431	9.05047	25.9192	13.6648
ENSMUSG00000006221	0	0	0.815828	2.92809	0	0	0	4.04327	0	0	36.1726	0	1.02699	0.271943	0.976028	1.34776	9.29989	0	0	0	0.513496
ENSMUSG00000006235	13.6715	12.1007	8.15828	34.161	13.9862	12.0673	36.5224	42.4543	36.2958	48.9951	48.5242	49.8159	27.7288	11.3102	20.0715	38.4242	43.766	12.1007	13.9862	36.5224	48.7597
ENSMUSG00000006241	49.3692	45.6104	63.6346	70.274	57.1102	80.4486	9.42515	30.3245	24.834	45.9329	37.0548	45.8831	36.9717	52.8714	69.2776	21.5279	41.4606	49.3692	70.274	24.834	41.469
ENSMUSG00000006262	729.904	590.142	764.431	369.915	636.371	541.017	467.723	366.927	438.096	395.023	380.253	588.614	495.01	694.826	515.768	424.249	464.725	729.904	541.017	438.096	445.017
ENSMUSG00000006269	0	0	0	0	1.16551	1.00561	0	1.01082	0	0	0	0	0	0	0.723707	0.336939	0	0	1.00561	0	0
ENSMUSG00000006270	0	0	0	0	0	0	0	0	0	0	0	0	0	0	0	0	0	0	0	0	0
ENSMUSG00000006273	489.135	457.035	475.628	429.452	348.489	365.036	338.127	269.888	436.186	361.339	318.495	436.545	487.821	473.932	380.992	348.067	401.05	475.628	365.036	338.127	398.942
ENSMUSG00000006276	100.257	114.491	100.347	144.452	169	167.937	94.2515	126.352	129.264	269.473	224.976	144.204	133.509	105.032	160.463	116.623	193.04	100.347	167.937	126.352	184.59
ENSMUSG00000006281	145.829	134.039	164.797	130.788	272.73	260.452	123.705	141.514	126.717	183.732	149.984	170.423	231.073	148.222	221.324	130.645	183.803	145.829	260.452	126.717	177.077
ENSMUSG00000006288	54.6859	59.5727	57.108	76.1302	65.2688	57.3197	53.0165	49.5301	61.7665	4.59329	9.70484	22.2861	18.4859	57.1222	66.2396	54.771	13.7675	57.108	65.2688	53.0165	14.0953
ENSMUSG00000006289	44.812	57.7111	62.8188	85.8905	59.4412	62.3477	96.6078	109.168	117.802	82.6793	118.223	86.5224	87.2943	55.114	69.2265	107.859	93.6796	57.7111	62.3477	109.168	86.9084
ENSMUSG00000006299	1197.77	1365.52	988.784	1626.06	946.398	1068.96	1105.1	1166.48	915.672	1128.42	1366.62	1757.98	1375.14	1184.02	1213.81	1062.42	1407.04	1197.77	1068.96	1105.1	1370.88
ENSMUSG00000006301	584.835	720.458	641.241	281.096	285.551	266.486	564.331	629.739	479.486	1074.83	1114.29	806.231	785.649	648.845	277.711	557.852	945.251	641.241	281.096	564.331	940.531
ENSMUSG00000006304	739.019	816.333	726.087	468.494	480.192	423.361	756.368	649.956	715.091	959.998	741.979	629.254	747.65	760.479	457.349	707.138	769.72	739.019	468.494	715.091	744.815
ENSMUSG00000006307	328.875	380.707	349.174	573.905	465.04	591.297	314.564	370.97	362.321	589.473	464.068	296.274	265.991	352.919	543.414	349.285	403.951	349.174	573.905	362.321	380.171
ENSMUSG00000006310	11.3929	11.1699	7.34245	2.92809	1.16551	6.03365	8.247	25.2704	7.64122	6.12439	5.29355	2.62189	12.3239	9.96841	3.37575	13.7196	6.59093	11.1699	2.92809	8.247	5.70897
ENSMUSG00000006311	0	0	0	0	0	0	0	0	1.27354	6.12439	0.882258	0	0	0	0	0.424512	1.75166	0	0	0	0.441129
ENSMUSG00000006313	0	0	0.815828	0	0	0	0	2.02164	0.636768	1.5311	3.52903	1.31095	0	0.271943	0	0.886134	1.59277	0	0	0.636768	1.42102
ENSMUSG00000006315	625.849	719.527	618.398	684.196	495.344	524.927	424.132	375.013	450.832	724.209	887.551	732.818	661.383	654.591	568.156	416.659	751.49	625.849	524.927	424.132	728.514
ENSMUSG00000006333	752.69	1040.66	574.343	676.388	427.744	406.266	505.424	341.656	315.2	1877.13	2038.02	1931.02	2061.17	789.231	503.466	387.427	1976.83	752.69	427.744	341.656	1984.52
ENSMUSG00000006335	99.4979	128.454	93.0044	88.8186	52.4481	42.2355	95.4296	91.9844	64.3136	78.086	89.9903	83.9005	77.0244	106.985	61.1674	83.9092	82.2503	99.4979	52.4481	91.9844	80.9932
ENSMUSG00000006342	25.8239	18.6165	26.1065	37.0891	15.1517	22.1234	20.0284	44.476	21.0133	143.923	223.211	48.505	80.1054	23.5156	24.788	28.5059	123.936	25.8239	22.1234	21.0133	112.014
ENSMUSG00000006344	17.4691	22.3398	17.9482	18.5445	13.9862	8.04486	69.5105	50.5409	28.0178	82.6793	113.811	94.388	71.8895	19.2524	13.5252	49.3564	90.692	17.9482	13.9862	50.5409	88.5337
ENSMUSG00000006345	1.51905	0.930824	0.815828	0.976028	0	3.01682	5.89072	4.04327	3.82061	0	0	0	0	1.08857	1.33095	4.58487	0	0.930824	0.976028	4.04327	0
ENSMUSG00000006356	708.638	1057.42	762.799	802.295	572.268	848.733	801.138	1474.78	759.664	1446.89	1786.57	738.062	1480.92	842.951	741.099	1011.86	1363.11	762.799	802.295	801.138	1463.91
ENSMUSG00000006360	9.87384	24.2014	11.4216	32.2089	9.32411	6.03365	12.9596	28.3029	20.3766	50.5262	100.577	28.8408	53.4036	15.1656	15.8556	20.5464	58.337	11.4216	9.32411	20.3766	51.9649
ENSMUSG00000006362	30.381	43.7487	30.1856	8.78426	24.4758	11.0617	53.0165	68.7356	35.0222	45.9329	41.4661	28.8408	28.7558	34.7718	14.7739	52.2581	36.2489	30.381	11.0617	53.0165	35.1535
ENSMUSG00000006369	9.11431	6.51577	8.97411	34.161	8.1586	14.0785	93.0733	32.3462	33.7487	13.7799	41.4661	9.17662	12.3239	8.2014	18.7994	53.0561	19.1866	8.97411	14.0785	33.7487	13.0519
ENSMUSG00000006373	14756.8	12060.7	16186	10744.1	11657.5	11280.9	9673.74	9044.8	12336.7	8943.14	9463.1	10498	10415.8	14334.5	11227.5	10351.8	9830.01	14756.8	11280.9	9673.74	9939.43
ENSMUSG00000006378	702.562	637.614	521.314	353.322	248.255	225.256	103.677	90.9736	94.8784	315.406	380.253	350.022	373.825	620.497	275.611	96.5096	354.877	637.614	248.255	94.8784	361.924
ENSMUSG00000006386	109.372	70.7426	100.347	87.8426	121.213	94.5271	94.2515	82.887	117.165	110.239	88.2258	103.565	115.023	93.4871	101.194	98.1013	104.263	100.347	94.5271	94.2515	106.902
ENSMUSG00000006389	0.759526	0	0	0	0	1.00561	0	0	0.636768	0	0	0	0	0.253175	0.335203	0.212256	0	0	0	0	0
ENSMUSG00000006390	505.085	570.595	518.051	545.6	742.433	643.589	961.365	877.39	946.237	1929.18	2226.82	1723.89	1507.62	531.244	643.874	928.331	1846.88	518.051	643.589	946.237	1826.54
ENSMUSG00000006392	344.065	474.72	377.728	252.791	280.889	304.699	328.702	316.386	367.415	255.693	269.089	285.786	319.395	398.838	279.46	337.501	282.491	377.728	280.889	328.702	277.437
ENSMUSG00000006398	4.55716	0.930824	4.89497	5.85617	4.66206	3.01682	3.53443	19.2055	16.556	78.086	72.3451	24.908	67.7815	3.46098	4.51168	13.0986	60.7801	4.55716	4.66206	16.556	70.0633
ENSMUSG00000006403	1.51905	0.930824	3.26331	1.95206	4.66206	3.01682	7.06886	19.2055	6.36768	4.59329	0	0	2.05398	1.9044	3.21031	10.8807	1.66182	1.51905	3.01682	7.06886	1.02699
ENSMUSG00000006411	0.759526	2.79247	2.44748	3.90411	0	1.00561	7.06886	9.09736	8.27798	0	3.52903	0	2.05398	1.99983	1.63657	8.14807	1.39575	2.44748	1.00561	8.27798	1.02699
ENSMUSG00000006412	237.732	322.996	229.248	278.168	192.31	216.206	144.912	165.774	238.151	177.607	187.039	121.918	141.725	263.325	228.895	182.946	157.072	237.732	216.206	165.774	159.666
ENSMUSG00000006418	891.683	873.113	775.037	875.497	744.764	735.099	613.813	612.555	626.58	411.865	453.481	406.393	400.527	846.611	785.12	617.649	418.066	873.113	744.764	613.813	409.129
ENSMUSG00000006435	1.51905	0.930824	3.26331	6.8322	3.49654	5.02804	9.42515	0	2.54707	7.65549	7.94032	11.7985	7.18895	1.9044	5.11893	3.99074	8.64582	1.51905	5.02804	2.54707	7.7979
ENSMUSG00000006442	132.917	188.957	141.954	308.425	194.641	230.284	506.602	250.683	292.277	444.018	337.905	259.567	197.182	154.609	244.45	349.854	309.668	141.954	230.284	292.277	298.736
ENSMUSG00000006445	196.717	306.241	215.379	104.435	264.572	425.372	239.163	592.339	303.738	451.674	373.195	340.846	332.745	239.446	264.793	378.414	374.615	215.379	264.572	303.738	357.02
ENSMUSG00000006456	191.401	174.064	159.086	155.189	145.689	201.122	250.945	249.672	165.56	255.693	246.15	203.196	166.373	174.85	167.333	222.059	217.853	174.064	155.189	249.672	224.673
ENSMUSG00000006457	0	0	0	0.976028	0	4.02243	0	0	0	0	0	0	0	0	1.66615	0	0	0	0.976028	0	0
ENSMUSG00000006463	33.4191	41.8871	50.5813	54.6576	36.1309	43.2411	36.5224	23.2488	33.1119	62.775	45.8774	48.505	33.8907	41.9625	44.6766	30.9611	47.762	41.8871	43.2411	33.1119	47.1912
ENSMUSG00000006464	7.59526	14.8932	16.3166	29.2809	25.6413	24.1346	20.0284	20.2164	31.2016	59.7128	74.1097	47.194	58.5386	12.935	26.3523	23.8155	59.8888	14.8932	25.6413	20.2164	59.1257
ENSMUSG00000006469	0	0	0	0	0	0	0	0	0	0	0	0	0	0	0	0	0	0	0	0	0
ENSMUSG00000006471	219.503	232.706	222.721	262.552	167.834	235.312	172.009	189.023	208.86	257.224	292.027	237.281	207.452	224.977	221.899	189.964	248.496	222.721	235.312	189.023	247.253
ENSMUSG00000006476	1506.14	1869.09	1397.51	1669.01	1276.24	1405.84	2158.36	1446.48	1251.89	1217.22	1226.34	1192.96	1142.02	1590.92	1450.36	1618.91	1194.63	1506.14	1405.84	1446.48	1205.09
ENSMUSG00000006488	0	0	0	0	0	0	0	0	0	0	0	0	0	0	0	0	0	0	0	0	0
ENSMUSG00000006490	0	0	0	0	0	0	0	0	0	0	0	0	0	0	0	0	0	0	0	0	0
ENSMUSG00000006494	1358.03	1083.48	1250.66	692.98	813.529	746.161	726.915	794.503	972.345	672.152	696.984	774.768	1015.7	1230.73	750.89	831.254	789.9	1250.66	746.161	794.503	735.876
ENSMUSG00000006498	887.886	1241.72	991.231	912.587	662.012	685.825	822.344	972.407	632.311	1206.51	1034.01	639.741	497.064	1040.28	753.474	809.02	844.329	991.231	685.825	822.344	836.874
ENSMUSG00000006517	500.528	627.375	465.838	218.63	381.123	200.116	917.774	1082.59	944.964	1384.11	1845.68	1313.57	1530.22	531.247	266.623	981.774	1518.4	500.528	218.63	944.964	1457.17
ENSMUSG00000006519	39.4953	33.5097	31.0015	36.113	24.4758	17.0953	16.494	97.0385	26.7443	79.6171	41.4661	31.4627	34.9177	34.6688	25.8947	46.7589	46.8659	33.5097	24.4758	26.7443	38.1919
ENSMUSG00000006522	6084.56	6238.38	6193.77	8537.32	9625.98	9953.51	13149.3	11807.4	15710.3	16771.6	19003.8	20172.8	19773.7	6172.24	9372.27	13555.7	18930.5	6193.77	9625.98	13149.3	19388.8
ENSMUSG00000006526	116.207	113.561	118.295	174.709	106.062	71.3982	110.745	106.136	150.277	110.239	84.6968	114.052	103.726	116.021	117.39	122.386	103.179	116.207	106.062	110.745	106.983
ENSMUSG00000006527	342.546	259.7	326.331	295.737	469.702	465.596	379.362	394.219	483.307	290.909	370.548	440.478	362.528	309.526	410.345	418.963	366.116	326.331	465.596	394.219	366.538
ENSMUSG00000006529	5945.57	5643.59	6389.57	7034.24	7920.84	8028.77	8071.46	8381.7	9673.78	11135.7	12596	10778.6	9230.61	5992.91	7661.28	8708.98	10935.2	5945.57	7920.84	8381.7	10957.1
ENSMUSG00000006538	19.7477	30.7172	37.5281	4.88014	20.9793	5.02804	29.4536	53.5733	26.7443	70.4305	57.3468	35.3955	6.16195	29.331	10.2958	36.5904	42.3337	30.7172	5.02804	29.4536	46.3711
ENSMUSG00000006542	1.51905	3.7233	2.44748	0	3.49654	5.02804	0	3.03245	3.82061	4.59329	5.29355	6.55473	8.21594	2.56328	2.84153	2.28435	6.16438	2.44748	3.49654	3.03245	5.92414
ENSMUSG00000006546	0	0	0	0	0	0	0	0	0	0	0	0	0	0	0	0	0	0	0	0	0
ENSMUSG00000006567	396.473	353.713	439.731	393.339	430.075	392.187	391.144	503.387	434.913	143.923	158.806	235.97	178.697	396.639	405.2	443.148	179.349	396.473	393.339	434.913	168.752
ENSMUSG00000006570	0	0	0	0	0	0	0	0	0	0	0	0	0	0	0	0	0	0	0	0	0
ENSMUSG00000006574	2.27858	3.7233	0.815828	0	0	1.00561	0	5.05409	8.91475	6.12439	8.82258	14.4204	3.08098	2.27257	0.335203	4.65628	8.11209	2.27858	0	5.05409	7.47349
ENSMUSG00000006575	127.6	184.303	114.216	107.363	83.917	82.4599	167.296	197.109	184.026	220.478	293.792	364.443	268.045	142.04	91.2467	182.811	286.689	127.6	83.917	184.026	280.918
ENSMUSG00000006576	11.3929	6.51577	5.7108	4.88014	9.32411	6.03365	2.35629	5.05409	3.18384	6.12439	1.76452	2.62189	1.02699	7.87315	6.74597	3.53141	2.88445	6.51577	6.03365	3.18384	2.1932
ENSMUSG00000006585	28.862	28.8555	39.1597	39.0411	32.6344	24.1346	104.855	77.833	52.215	12.2488	1.76452	0	4.10797	32.2924	31.9367	78.3009	4.53032	28.862	32.6344	77.833	2.93624
ENSMUSG00000006586	1.51905	2.79247	4.07914	5.85617	5.82757	2.01122	1.17814	3.03245	0.636768	3.0622	1.76452	3.93284	3.08098	2.79689	4.56499	1.61579	2.96013	2.79247	5.82757	1.17814	3.07159
ENSMUSG00000006587	1.51905	0	0	5.85617	3.49654	0	0	1.01082	0.636768	26.0287	12.3516	11.7985	8.21594	0.506351	3.11757	0.549195	14.5987	0	3.49654	0.636768	12.0751
ENSMUSG00000006589	187.603	323.927	275.75	362.107	177.158	225.256	1221.73	1958.96	823.978	19.9043	25.5855	7.86567	14.3779	262.426	254.84	1334.89	16.9333	275.75	225.256	1221.73	17.1411
ENSMUSG00000006599	255.96	214.089	269.223	208.87	226.11	235.312	286.289	226.423	267.443	179.138	145.573	162.557	151.995	246.424	223.431	260.052	159.816	255.96	226.11	267.443	157.276
ENSMUSG00000006611	527.871	444.934	526.209	713.477	625.881	625.488	419.419	403.316	490.948	235.789	247.914	298.895	387.176	499.671	654.949	437.895	292.444	526.209	625.881	419.419	273.405
ENSMUSG00000006641	66.0788	57.7111	63.6346	140.548	73.4274	66.3701	256.835	208.228	282.725	128.612	189.685	159.935	123.239	62.4748	93.4485	249.263	150.368	63.6346	73.4274	256.835	144.274
ENSMUSG00000006642	2.27858	1.86165	0.815828	0	0	0	5.89072	2.02164	0.636768	0	0.882258	1.31095	1.02699	1.65202	0	2.84971	0.805049	1.86165	0	2.02164	0.954625
ENSMUSG00000006649	0	0	0	0	0	0	0	0	0	0	0	0	0	0	0	0	0	0	0	0	0
ENSMUSG00000006651	4.55716	6.51577	5.7108	7.80823	3.49654	3.01682	4.71257	2.02164	0	21.4354	26.4677	11.7985	13.3509	5.59457	4.77386	2.24474	18.2631	5.7108	3.49654	2.02164	17.3931
ENSMUSG00000006673	445.082	417.94	453.6	611.97	662.012	655.656	458.298	581.22	527.881	606.315	533.766	482.428	491.929	438.874	643.213	522.466	528.609	445.082	655.656	527.881	512.848
ENSMUSG00000006675	0.759526	2.79247	1.63166	4.88014	0	0	0	1.01082	1.27354	4.59329	1.76452	0	0	1.72788	1.62671	0.761451	1.58945	1.63166	0	1.01082	0.882258
ENSMUSG00000006676	659.269	597.589	651.847	984.813	733.109	834.655	702.174	652.988	593.468	748.707	895.492	711.843	730.191	636.235	850.859	649.543	771.558	651.847	834.655	652.988	739.449
ENSMUSG00000006678	28.1025	22.3398	26.9223	38.0651	66.4343	51.286	49.482	18.1947	28.0178	19.9043	21.1742	32.7736	33.8907	25.7882	51.9285	31.8982	26.9357	26.9223	51.286	28.0178	26.9739
ENSMUSG00000006699	1530.44	1574.02	1742.61	1176.11	1283.23	1291.2	1958.07	1334.28	1792.5	1148.32	1116.94	1171.98	1253.96	1615.69	1250.18	1694.95	1172.8	1574.02	1283.23	1792.5	1160.15
ENSMUSG00000006705	132.917	173.133	163.981	146.404	220.282	195.088	139.021	89.9628	129.264	159.234	114.694	159.935	132.482	156.677	187.258	119.416	141.586	163.981	195.088	129.264	145.858
ENSMUSG00000006711	125.322	94.944	108.505	104.435	179.489	123.69	76.5793	43.4652	61.7665	15.311	9.70484	18.3532	19.5129	109.59	135.871	60.6037	15.7205	108.505	123.69	61.7665	16.8321
ENSMUSG00000006715	41.0144	48.4028	55.4763	25.3767	15.1517	15.0841	40.0569	34.3678	56.6724	36.7463	38.8193	47.194	49.2956	48.2979	18.5375	43.699	43.0138	48.4028	15.1517	40.0569	43.0067
ENSMUSG00000006717	448.12	578.042	453.6	114.195	164.338	138.774	392.322	846.054	551.441	601.721	666.987	557.152	660.356	493.254	139.102	596.606	621.554	453.6	138.774	551.441	631.039
ENSMUSG00000006720	1.51905	0.930824	2.44748	3.90411	4.66206	5.02804	7.06886	6.06491	6.36768	3.0622	0.882258	0	1.02699	1.63245	4.5314	6.50048	1.24286	1.51905	4.66206	6.36768	0.954625
ENSMUSG00000006724	0.759526	0	0	2.92809	1.16551	3.01682	0	1.01082	3.82061	3.0622	0.882258	1.31095	0	0.253175	2.37014	1.61048	1.31385	0	2.92809	1.01082	1.0966
ENSMUSG00000006728	228.617	346.266	234.143	242.055	138.696	186.037	241.519	226.423	217.775	225.071	249.679	224.172	182.805	269.675	188.93	228.572	220.432	234.143	186.037	226.423	224.621
ENSMUSG00000006731	1012.45	1518.17	1241.69	1327.4	878.798	925.159	1630.55	803.6	855.816	12.2488	19.4097	9.17662	11.2969	1257.44	1043.79	1096.66	13.033	1241.69	925.159	855.816	11.7728
ENSMUSG00000006732	85.0669	153.586	93.8202	81.9864	79.255	80.4486	81.2919	79.8546	161.102	160.765	160.571	142.893	125.293	110.824	80.5633	107.416	147.381	93.8202	80.4486	81.2919	151.732
ENSMUSG00000006736	1484.87	1395.3	1419.54	851.097	835.674	824.599	2159.54	1640.56	1834.53	1097.8	1400.14	1655.72	1551.79	1433.24	837.123	1878.21	1426.36	1419.54	835.674	1834.53	1475.96
ENSMUSG00000006740	307.608	272.731	341.016	213.75	470.868	428.389	144.912	190.034	192.941	101.052	109.4	201.886	224.911	307.119	371.002	175.962	159.312	307.608	428.389	190.034	155.643
ENSMUSG00000006763	34.1787	32.5788	55.4763	85.8905	78.0895	89.4991	40.0569	39.4219	56.6724	38.2774	39.7016	45.8831	53.4036	40.7446	84.493	45.3837	44.3164	34.1787	85.8905	40.0569	42.7923
ENSMUSG00000006764	0	0	0	0	0	0	0	0	0	1.5311	0	1.31095	1.02699	0	0	0	0.967259	0	0	0	1.16897
ENSMUSG00000006777	22.7858	23.2706	26.9223	262.552	160.841	130.729	503.067	425.554	294.824	111.77	382.018	212.373	116.05	24.3262	184.707	407.815	205.553	23.2706	160.841	425.554	164.212
ENSMUSG00000006782	42.5335	45.6104	46.5022	45.8733	40.793	31.1738	49.482	38.4111	26.1075	33.6842	41.4661	43.2612	66.7545	44.882	39.2801	38.0002	46.2915	45.6104	40.793	38.4111	42.3637
ENSMUSG00000006784	5.31668	1.86165	6.52662	6.8322	2.33103	6.03365	32.988	37.4003	21.0133	3.0622	6.17581	5.24378	3.08098	4.56832	5.06563	30.4672	4.39069	5.31668	6.03365	32.988	4.16238
ENSMUSG00000006800	107.853	140.554	159.086	884.282	525.647	453.529	273.329	291.115	381.424	1650.52	1750.4	1047.45	964.346	135.831	621.153	315.29	1353.18	140.554	525.647	291.115	1348.98
ENSMUSG00000006818	2088.7	2332.64	2039.57	1907.16	2051.31	2201.28	1945.11	2024.67	2251.61	1645.93	1836.86	2187.97	1971.82	2153.64	2053.25	2073.8	1910.65	2088.7	2051.31	2024.67	1904.34
ENSMUSG00000006850	84.3074	100.529	68.5296	52.7055	54.7792	50.2804	32.988	50.5409	24.1972	55.1195	49.4064	48.505	39.0257	84.4553	52.5884	35.9087	48.0142	84.3074	52.7055	32.988	48.9557
ENSMUSG00000006906	198.996	234.568	239.853	126.884	136.365	120.673	111.924	147.579	170.017	212.823	246.15	167.801	189.994	224.472	127.974	143.173	204.192	234.568	126.884	147.579	201.408
ENSMUSG00000006920	166.336	194.542	169.692	230.343	159.675	252.408	156.693	167.796	172.564	143.923	165.864	162.557	145.833	176.857	214.142	165.684	154.544	169.692	230.343	167.796	154.195
ENSMUSG00000006930	21.2667	26.0631	21.2115	36.113	18.6482	9.05047	1.17814	10.1082	10.1883	6.12439	6.17581	2.62189	3.08098	22.8471	21.2706	7.1582	4.50077	21.2667	18.6482	10.1082	4.60268
ENSMUSG00000006931	6.07621	4.65412	1.63166	5.85617	6.99309	13.0729	10.6033	5.05409	7.64122	0	1.76452	0	4.10797	4.12066	8.64072	7.7662	1.46812	4.65412	6.99309	7.64122	0.882258
ENSMUSG00000006932	1895.02	1580.54	2095.86	2617.71	3224.98	3204.87	2653.18	2692.82	3052.03	2420.67	2297.4	2701.86	3200.11	1857.14	3015.85	2799.34	2655.01	1895.02	3204.87	2692.82	2561.26
ENSMUSG00000006941	150.386	201.989	158.271	114.195	136.365	125.701	210.888	179.926	149.64	189.856	179.098	169.112	174.589	170.215	125.42	180.151	178.164	158.271	125.701	179.926	176.844
ENSMUSG00000006948	0	0	0	0	0	0	0	0	0	0	0	0	0	0	0	0	0	0	0	0	0
ENSMUSG00000006958	53.9263	62.3652	41.6072	77.1062	64.1033	58.3253	29.4536	30.3245	44.5738	42.8707	56.4645	49.8159	36.9717	52.6329	66.5116	34.784	46.5307	53.9263	64.1033	30.3245	46.3433
ENSMUSG00000006998	1117.26	1046.25	850.093	814.984	896.281	806.498	979.037	1115.94	1130.9	866.601	925.489	899.308	963.319	1004.53	839.254	1075.29	913.679	1046.25	814.984	1115.94	912.398
ENSMUSG00000007021	2.27858	0	0	1.95206	5.82757	6.03365	247.41	190.034	180.842	4.59329	0	0	0	0.759526	4.60443	206.095	1.14832	0	5.82757	190.034	0
ENSMUSG00000007029	295.456	339.751	250.459	417.74	224.944	294.643	451.229	254.726	291.003	350.621	367.019	415.57	324.53	295.222	312.443	332.319	364.435	295.456	294.643	291.003	358.82
ENSMUSG00000007030	2.27858	6.51577	3.26331	3.90411	10.4896	3.01682	24.741	25.2704	24.834	0	1.76452	0	0	4.01922	5.80352	24.9485	0.441129	3.26331	3.90411	24.834	0
ENSMUSG00000007033	23.5453	25.1322	26.9223	21.4726	26.8068	30.1682	9.42515	0	7.64122	1.5311	1.76452	2.62189	5.13496	25.2	26.1492	5.68879	2.76312	25.1322	26.8068	7.64122	2.1932
ENSMUSG00000007034	2.27858	5.58494	4.07914	4.88014	9.32411	3.01682	0	4.04327	1.27354	6.12439	3.52903	7.86567	2.05398	3.98089	5.74036	1.77227	4.89327	4.07914	4.88014	1.27354	4.82671
ENSMUSG00000007035	9.87384	9.30824	9.78994	27.3288	22.1448	24.1346	31.8099	21.2272	28.6546	1.5311	0.882258	1.31095	4.10797	9.65734	24.5361	27.2305	1.95807	9.78994	24.1346	28.6546	1.42102
ENSMUSG00000007036	241.529	237.36	209.668	340.634	189.979	246.374	233.272	133.428	111.434	226.602	273.5	209.751	195.129	229.519	258.996	159.378	226.246	237.36	246.374	133.428	218.177
ENSMUSG00000007038	372.168	444.003	336.121	700.788	493.013	541.017	392.322	214.293	191.03	399.617	345.845	323.803	261.883	384.097	578.273	265.882	332.787	372.168	541.017	214.293	334.824
ENSMUSG00000007039	16.7096	32.5788	18.764	40.0172	13.9862	23.129	11.7814	28.3029	20.3766	35.2152	24.7032	19.6642	30.8098	22.6842	25.7108	20.1536	27.5981	18.764	23.129	20.3766	27.7565
ENSMUSG00000007041	158.741	223.398	149.297	117.123	110.724	102.572	219.135	197.109	185.936	168.421	160.571	119.296	136.59	177.145	110.14	200.727	146.219	158.741	110.724	197.109	148.58
ENSMUSG00000007050	86.586	163.825	135.427	97.6028	50.1171	49.2748	167.296	109.168	116.529	232.727	184.392	175.667	202.317	128.613	65.6649	130.998	198.776	135.427	50.1171	116.529	193.355
ENSMUSG00000007080	19.7477	6.51577	14.6849	49.7774	53.6137	68.3813	17.6722	15.1623	20.3766	93.397	58.229	48.505	53.4036	13.6494	57.2575	17.737	63.3836	14.6849	53.6137	17.6722	55.8163
ENSMUSG00000007097	10.6334	9.30824	9.78994	29.2809	4.66206	12.0673	2.35629	3.03245	5.09414	4.59329	16.7629	1.31095	2.05398	9.91051	15.3367	3.49429	6.18028	9.78994	12.0673	3.03245	3.32364
ENSMUSG00000007107	2.27858	0	0	0	0	0	0	0	0	0	0	0	0	0.759526	0	0	0	0	0	0	0
ENSMUSG00000007122	1.51905	1.86165	1.63166	0.976028	1.16551	1.00561	0	0	2.54707	0	0	0	0	1.67079	1.04905	0.849024	0	1.63166	1.00561	0	0
ENSMUSG00000007207	6.83573	13.0315	5.7108	7.80823	9.32411	3.01682	8.247	3.03245	5.09414	4.59329	4.41129	5.24378	5.13496	8.52602	6.71639	5.45787	4.84583	6.83573	7.80823	5.09414	4.86413
ENSMUSG00000007209	0	0	0	0	0	0	0	0	0.636768	0	0	0	0	0	0	0.212256	0	0	0	0	0
ENSMUSG00000007216	31.1406	26.9939	22.0274	65.3939	34.9654	41.2299	28.2754	35.3786	29.9281	55.1195	82.9322	90.4552	97.5643	26.7206	47.1964	31.1941	81.5178	26.9939	41.2299	29.9281	86.6937
ENSMUSG00000007279	0	0	0	0	0	0	0	0	0	0	0	0	0	0	0	0	0	0	0	0	0
ENSMUSG00000007338	325.837	479.374	455.232	320.137	303.034	346.935	338.127	388.154	294.187	280.191	267.324	300.206	241.343	420.148	323.369	340.156	272.266	455.232	320.137	338.127	273.758
ENSMUSG00000007379	4.55716	1.86165	4.89497	2.92809	4.66206	4.02243	9.42515	8.08654	8.91475	4.59329	2.64677	7.86567	3.08098	3.77126	3.87086	8.80881	4.54668	4.55716	4.02243	8.91475	3.83713
ENSMUSG00000007411	379.763	409.562	413.625	436.285	386.951	400.232	446.516	368.948	441.28	252.631	220.564	294.963	303.99	400.983	407.822	418.915	268.037	409.562	400.232	441.28	273.797
ENSMUSG00000007415	188.362	205.712	214.563	118.099	134.034	132.74	108.389	137.471	145.183	316.937	292.91	178.289	164.319	202.879	128.291	130.348	238.114	205.712	132.74	137.471	235.599
ENSMUSG00000007440	0	0	0	0	0	0	0	0	0	0	0	0	0	0	0	0	0	0	0	0	0
ENSMUSG00000007457	0	0	0	0	0	0	0	0	0	0	0	0	0	0	0	0	0	0	0	0	0
ENSMUSG00000007458	949.407	890.798	943.097	475.326	508.164	505.821	567.865	588.296	417.083	290.909	306.143	353.955	305.017	927.768	496.437	524.415	314.006	943.097	505.821	567.865	305.58
ENSMUSG00000007476	840.036	779.1	708.139	965.292	749.426	828.621	783.465	890.53	749.476	1491.29	1528.95	1284.73	1219.04	775.758	847.78	807.824	1381	779.1	828.621	783.465	1388.01
ENSMUSG00000007480	0	0	0	0	0	0	0	0	0	0	0	0	0	0	0	0	0	0	0	0	0
ENSMUSG00000007564	584.835	755.829	637.978	820.84	532.64	605.376	927.199	1056.3	918.856	975.309	1091.35	941.259	972.562	659.547	652.952	967.453	995.121	637.978	605.376	927.199	973.935
ENSMUSG00000007570	96.4598	112.63	69.3454	152.26	71.0964	119.667	137.843	123.32	96.7887	94.9281	110.282	76.0348	68.8085	92.8116	114.341	119.317	87.5134	96.4598	119.667	123.32	85.4814
ENSMUSG00000007589	125.322	161.033	120.743	98.5789	82.7515	92.5159	137.843	132.417	117.802	42.8707	52.9355	43.2612	59.5655	135.699	91.2821	129.354	49.6582	125.322	92.5159	132.417	48.0983
ENSMUSG00000007591	4.55716	4.65412	2.44748	11.7123	15.1517	11.0617	0	0	1.27354	3.0622	0	0	0	3.88625	12.6419	0.424512	0.765549	4.55716	11.7123	0	0
ENSMUSG00000007594	147.348	181.511	175.403	295.737	333.337	277.548	240.341	167.796	205.676	0	2.64677	1.31095	2.05398	168.087	302.207	204.604	1.50293	175.403	295.737	205.676	1.68246
ENSMUSG00000007603	142.791	175.926	159.086	256.695	160.841	148.83	278.042	197.109	154.098	209.76	192.332	178.289	188.967	159.268	188.789	209.75	192.337	159.086	160.841	197.109	190.649
ENSMUSG00000007610	50.8882	80.0509	40.7914	240.103	188.813	236.318	175.543	273.932	157.918	65.8372	134.985	76.0348	88.3213	57.2435	221.745	202.464	91.2947	50.8882	236.318	175.543	82.1781
ENSMUSG00000007613	317.482	276.455	334.49	273.288	346.158	402.243	347.552	428.587	523.423	267.942	221.447	310.694	273.18	309.475	340.563	433.187	268.316	317.482	346.158	428.587	270.561
ENSMUSG00000007617	54.6859	26.0631	34.2648	19.5206	72.2619	48.2692	48.3039	26.2813	35.0222	29.0909	24.7032	36.7065	52.3766	38.3379	46.6839	36.5358	35.7193	34.2648	48.2692	35.0222	32.8987
ENSMUSG00000007646	2.27858	5.58494	2.44748	0.976028	3.49654	14.0785	5.89072	1.01082	1.27354	9.18659	1.76452	5.24378	6.16195	3.437	6.18369	2.72502	5.58921	2.44748	3.49654	1.27354	5.70287
ENSMUSG00000007653	0	0	0	0	0	0	0	0	0	0	0	0	0	0	0	0	0	0	0	0	0
ENSMUSG00000007655	168.615	62.3652	87.2936	44.8973	51.2826	40.2243	73.0449	56.6058	106.977	15.311	31.7613	11.7985	15.4049	106.091	45.4681	78.8759	18.5689	87.2936	44.8973	73.0449	15.3579
ENSMUSG00000007656	457.994	613.413	510.708	263.528	355.482	381.125	440.626	249.672	427.908	396.554	380.253	353.955	410.797	527.372	333.378	372.735	385.39	510.708	355.482	427.908	388.404
ENSMUSG00000007659	312.165	443.072	406.282	420.668	361.309	317.772	451.229	310.321	352.77	829.855	1109	672.515	324.53	387.173	366.583	371.44	733.974	406.282	361.309	352.77	751.185
ENSMUSG00000007670	546.859	904.761	615.134	623.682	379.958	436.434	797.603	765.189	462.294	1088.61	805.501	537.487	409.77	688.918	480.025	675.029	710.342	615.134	436.434	765.189	671.494
ENSMUSG00000007682	0	0	0	0	0	0	0	0	0	0	0.882258	0	0	0	0	0	0.220564	0	0	0	0
ENSMUSG00000007721	367.611	438.418	297.777	285	182.986	195.088	526.63	450.825	250.887	779.329	944.016	676.448	525.82	367.935	221.025	409.447	731.403	367.611	195.088	450.825	727.888
ENSMUSG00000007739	897.76	836.811	942.281	782.775	779.729	812.531	804.672	767.211	878.74	785.453	850.497	1132.66	1029.05	892.284	791.678	816.874	949.413	897.76	782.775	804.672	939.771
ENSMUSG00000007777	154.943	167.548	195.799	75.1542	146.855	185.032	120.171	188.012	164.923	81.1482	79.4032	116.674	136.59	172.763	135.68	157.702	103.454	167.548	146.855	164.923	98.9111
ENSMUSG00000007783	6.83573	6.51577	4.89497	16.5925	4.66206	10.0561	2.35629	6.06491	4.45738	6.12439	5.29355	1.31095	1.02699	6.08216	10.4369	4.29286	3.43897	6.51577	10.0561	4.45738	3.30225
ENSMUSG00000007805	0.759526	0	0.815828	0	0	0	0	0	0	1.5311	3.52903	0	0	0.525118	0	0	1.26503	0.759526	0	0	0.765549
ENSMUSG00000007812	420.777	287.625	268.407	348.442	363.64	354.98	193.216	136.46	181.479	143.923	167.629	176.978	210.533	325.603	355.687	170.385	174.766	287.625	354.98	181.479	172.303
ENSMUSG00000007815	1838.05	2126	1639	996.525	984.86	915.103	1389.03	1273.63	1511.69	776.267	783.445	995.007	985.912	1867.68	965.496	1391.45	885.158	1838.05	984.86	1389.03	884.679
ENSMUSG00000007817	411.663	449.588	513.972	625.634	587.419	493.754	543.124	563.025	645.046	849.759	780.798	445.721	517.604	458.408	568.936	583.732	648.471	449.588	587.419	563.025	649.201
ENSMUSG00000007827	31.1406	5.58494	24.4748	13.6644	52.4481	45.2524	24.741	47.5084	28.6546	13.7799	20.2919	15.7313	19.5129	20.4001	37.1216	33.6347	17.329	24.4748	45.2524	28.6546	17.6221
ENSMUSG00000007833	664.585	748.382	479.707	421.644	213.289	240.34	565.509	464.976	355.953	356.746	461.421	457.52	410.797	630.891	291.758	462.146	421.621	664.585	240.34	464.976	434.158
ENSMUSG00000007836	622.811	831.226	598.818	434.333	322.847	317.772	784.644	412.414	368.052	388.899	345.845	287.097	334.799	684.285	358.317	521.703	339.16	622.811	322.847	412.414	340.322
ENSMUSG00000007837	292.417	300.656	242.301	329.898	237.765	219.223	478.326	355.808	208.86	502.2	575.232	468.007	373.825	278.458	262.295	347.665	479.816	292.417	237.765	355.808	485.104
ENSMUSG00000007850	689.65	637.614	657.557	588.545	726.115	876.89	388.787	486.203	494.132	295.502	332.611	370.997	393.338	661.607	730.517	456.374	348.112	657.557	726.115	486.203	351.804
ENSMUSG00000007867	8.35479	17.6857	18.764	10.7363	3.49654	5.02804	18.8503	6.06491	15.2824	12.2488	19.4097	6.55473	8.21594	14.9348	6.4203	13.3992	11.6073	17.6857	5.02804	15.2824	10.2324
ENSMUSG00000007872	648.635	529.639	432.389	539.744	331.006	221.234	640.91	1050.24	466.751	316.937	193.214	183.532	191.021	536.888	363.995	719.3	221.176	529.639	331.006	640.91	192.118
ENSMUSG00000007877	0	0.930824	0	0.976028	0	0	0	0	0	0	2.64677	0	0	0.310275	0.325343	0	0.661693	0	0	0	0
ENSMUSG00000007880	400.27	345.336	423.415	676.388	686.488	705.937	249.766	624.685	345.128	1355.02	888.434	464.075	503.226	389.674	689.604	406.527	802.689	400.27	686.488	345.128	695.83
ENSMUSG00000007888	1.51905	0.930824	0	0.976028	0	0	0	0	0	3.0622	3.52903	5.24378	4.10797	0.816625	0.325343	0	3.98574	0.930824	0	0	3.8185
ENSMUSG00000007891	3592.56	3696.3	3254.34	3311.66	2437.09	2288.76	3331.79	3355.91	3212.49	5824.3	6699.87	4743	5081.56	3514.4	2679.17	3300.07	5587.18	3592.56	2437.09	3331.79	5452.93
ENSMUSG00000007892	2328.71	4169.16	2623.7	940.891	621.219	510.849	1440.87	7967.26	1388.79	586.41	341.434	386.729	360.474	3040.52	690.986	3598.98	418.762	2623.7	621.219	1440.87	373.602
ENSMUSG00000007907	0	0	0	0	0	0	0	0	0	0	0	0	0	0	0	0	0	0	0	0	0
ENSMUSG00000007908	0.759526	0	0	0	1.16551	2.01122	3.53443	0	0	0	0	0	1.02699	0.253175	1.05891	1.17814	0.256748	0	1.16551	0	0
ENSMUSG00000007944	0	0	0	0	0	0	0	0	0	0	0	0	0	0	0	0	0	0	0	0	0
ENSMUSG00000007946	0	0	0	0	0	0	0	0	0	0	0	0	0	0	0	0	0	0	0	0	0
ENSMUSG00000007950	35.6977	36.3021	30.1856	68.322	60.6067	68.3813	151.981	95.0169	39.4796	35.2152	32.6435	47.194	69.8355	34.0618	65.77	95.4923	46.2221	35.6977	68.322	95.0169	41.2046
ENSMUSG00000007987	24.3048	40.9562	19.5799	19.5206	12.8207	8.04486	23.5629	28.3029	19.7398	30.622	19.4097	26.2189	14.3779	28.2803	13.462	23.8685	22.6571	24.3048	12.8207	23.5629	22.8143
ENSMUSG00000007989	0.759526	0.930824	1.63166	0.976028	5.82757	0	0	1.01082	1.27354	3.0622	4.41129	5.24378	5.13496	1.10734	2.26787	0.761451	4.46306	0.930824	0.976028	1.01082	4.77313
ENSMUSG00000008028	0.759526	0.930824	0.815828	4.88014	1.16551	4.02243	1.17814	7.07572	0.636768	3.0622	3.52903	2.62189	5.13496	0.835393	3.35603	2.96355	3.58702	0.815828	4.02243	1.17814	3.29561
ENSMUSG00000008035	159.5	178.718	176.219	161.045	110.724	72.4038	438.269	345.7	186.573	356.746	330.847	239.903	131.455	171.479	114.724	323.514	264.738	176.219	110.724	345.7	285.375
ENSMUSG00000008036	460.273	644.13	397.308	519.247	241.261	303.694	731.627	607.501	478.213	721.147	712.864	710.532	605.925	500.57	354.734	605.78	687.617	460.273	303.694	607.501	711.698
ENSMUSG00000008090	433.689	469.135	439.731	849.145	397.44	313.75	393.5	336.602	309.469	692.056	837.263	819.341	527.874	447.519	520.112	346.524	719.133	439.731	397.44	336.602	755.698
ENSMUSG00000008129	0	0.930824	0.815828	0	2.33103	0	0	1.01082	0.636768	4.59329	2.64677	2.62189	3.08098	0.582217	0.77701	0.549195	3.23573	0.815828	0	0.636768	2.86388
ENSMUSG00000008136	9.87384	2.79247	5.7108	7.80823	8.1586	9.05047	3.53443	15.1623	2.54707	9.18659	11.4694	2.62189	11.2969	6.1257	8.3391	7.08126	8.64369	5.7108	8.1586	3.53443	10.2418
ENSMUSG00000008140	565.087	661.816	518.051	728.117	384.62	423.361	967.256	642.88	437.46	1650.52	1626	908.485	919.158	581.651	512.033	682.532	1276.04	565.087	423.361	642.88	1272.58
ENSMUSG00000008153	446.601	215.02	220.274	2.92809	23.3103	3.01682	10.6033	15.1623	14.0089	9.18659	33.5258	14.4204	21.5668	293.965	9.75173	13.2582	19.6749	220.274	3.01682	14.0089	17.9936
ENSMUSG00000008167	222.541	298.794	285.54	184.469	170.165	151.847	460.654	504.398	405.621	75.0238	82.05	70.791	89.3483	268.958	168.827	456.891	79.3033	285.54	170.165	460.654	78.5369
ENSMUSG00000008193	6.07621	6.51577	8.97411	5.85617	5.82757	4.02243	3.53443	4.04327	3.82061	1.5311	1.76452	2.62189	3.08098	7.18869	5.23539	3.79944	2.24962	6.51577	5.82757	3.82061	2.1932
ENSMUSG00000008200	293.937	249.461	259.433	280.12	315.854	331.851	151.981	218.337	205.039	372.057	323.789	251.701	214.641	267.61	309.275	191.785	290.547	259.433	315.854	205.039	287.745
ENSMUSG00000008206	16.7096	32.5788	32.6331	38.0651	36.1309	31.1738	14.1377	13.1406	12.7354	4.59329	10.5871	6.55473	4.10797	27.3072	35.1233	13.3379	6.46077	32.5788	36.1309	13.1406	5.57401
ENSMUSG00000008226	650.154	547.324	668.979	269.384	390.447	308.722	355.799	348.732	418.993	200.574	121.752	174.356	177.67	622.153	322.851	374.508	168.588	650.154	308.722	355.799	176.013
ENSMUSG00000008301	144.31	193.611	196.615	154.212	142.193	150.841	201.463	130.395	170.017	197.512	217.035	212.373	194.102	178.179	149.082	167.292	205.255	193.611	150.841	170.017	204.942
ENSMUSG00000008305	344.065	304.379	332.858	599.281	349.654	360.008	554.906	455.879	474.392	370.526	487.006	401.149	363.555	327.101	436.314	495.059	405.559	332.858	360.008	474.392	385.837
ENSMUSG00000008307	3.79763	6.51577	4.07914	5.85617	10.4896	4.02243	0	3.03245	0.636768	4.59329	0.882258	3.93284	6.16195	4.79751	6.78941	1.22307	3.89258	4.07914	5.85617	0.636768	4.26306
ENSMUSG00000008318	3.0381	1.86165	3.26331	1.95206	4.66206	4.02243	0	5.05409	0.636768	1.5311	0.882258	0	1.02699	2.72102	3.54552	1.89695	0.860087	3.0381	4.02243	0.636768	0.954625
ENSMUSG00000008333	76.7121	114.491	97.8994	36.113	48.9516	40.2243	76.5793	64.6923	59.8562	65.8372	47.6419	69.4801	66.7545	96.3676	41.763	67.0426	62.4284	97.8994	40.2243	64.6923	66.2958
ENSMUSG00000008348	2281.62	2602.58	2348.77	1486.49	1428.92	1872.44	5240.38	3449.92	6253.7	3957.89	7095.12	6687.13	6360.16	2410.99	1595.95	4981.33	6025.07	2348.77	1486.49	5240.38	6523.65
ENSMUSG00000008373	110.891	163.825	128.085	132.74	121.213	123.69	84.8263	150.612	138.179	165.359	180.863	175.667	173.562	134.267	125.881	124.539	173.862	128.085	123.69	138.179	174.614
ENSMUSG00000008384	35.6977	73.5351	40.7914	43.9213	27.9723	22.1234	86.0045	43.4652	36.9325	159.234	108.518	77.3458	36.9717	50.0081	31.339	55.4674	95.5173	40.7914	27.9723	43.4652	92.9317
ENSMUSG00000008393	1062.58	1237.06	1187.03	810.104	689.985	674.763	796.425	556.961	825.888	506.793	436.718	474.562	466.254	1162.22	724.95	726.425	471.082	1187.03	689.985	796.425	470.408
ENSMUSG00000008398	126.841	99.5982	121.558	107.363	103.731	82.4599	100.142	97.0385	103.156	127.081	127.045	81.2786	78.0514	115.999	97.8513	100.112	103.364	121.558	103.731	100.142	104.162
ENSMUSG00000008429	375.965	349.059	366.307	269.384	279.723	247.38	366.403	304.256	303.102	295.502	300.85	306.761	307.071	363.777	265.496	324.587	302.546	366.307	269.384	304.256	303.806
ENSMUSG00000008435	40.2549	13.0315	27.7382	108.339	87.4136	104.583	36.5224	34.3678	35.659	27.5598	23.821	14.4204	33.8907	27.0082	100.112	35.5164	24.923	27.7382	104.583	35.659	25.6904
ENSMUSG00000008438	0	1.86165	0.815828	0	0	1.00561	0	0	1.9103	0	1.76452	2.62189	4.10797	0.892492	0.335203	0.636768	2.12359	0.815828	0	0	2.1932
ENSMUSG00000008450	22.7858	40.9562	32.6331	20.4966	24.4758	30.1682	208.531	161.731	207.586	327.655	233.798	246.458	201.29	32.1251	25.0469	192.616	252.3	32.6331	24.4758	207.586	240.128
ENSMUSG00000008461	4.55716	7.44659	0	4.88014	4.66206	4.02243	10.6033	8.08654	14.0089	0	0.882258	1.31095	0	4.00125	4.52154	10.8996	0.548301	4.55716	4.66206	10.6033	0.441129
ENSMUSG00000008475	857.505	857.289	899.043	432.381	489.516	457.552	540.768	442.738	562.266	234.258	192.332	232.037	232.1	871.279	459.816	515.257	222.682	857.505	457.552	540.768	232.069
ENSMUSG00000008482	0.759526	0	0.815828	0	0	3.01682	0	0	0	0	0	0	0	0.525118	1.00561	0	0	0.759526	0	0	0
ENSMUSG00000008489	0	1.86165	0	0	0	0	0	0	0	0	0	0	0	0.620549	0	0	0	0	0	0	0
ENSMUSG00000008496	3.79763	0	0.815828	1.95206	1.16551	1.00561	0	1.01082	1.27354	6.12439	0.882258	1.31095	2.05398	1.53782	1.37439	0.761451	2.59289	0.815828	1.16551	1.01082	1.68246
ENSMUSG00000008540	43072.7	46399.7	46558.5	27121.9	32010.9	33667.8	17339.9	26741.2	23383.4	14494.9	16149.7	22022.6	20865.4	45343.6	30933.5	22488.2	18383.1	46399.7	32010.9	23383.4	18507.6
ENSMUSG00000008575	1189.42	1155.15	1115.24	782.775	1202.81	1097.12	598.497	589.307	549.531	832.917	989.893	1068.42	846.242	1153.27	1027.57	579.111	934.368	1155.15	1097.12	589.307	918.067
ENSMUSG00000008590	0	0	0	0	0	0	0	0	0	0	0	0	0	0	0	0	0	0	0	0	0
ENSMUSG00000008601	3.0381	7.44659	4.07914	1.95206	2.33103	0	5.89072	1.01082	1.9103	10.7177	5.29355	1.31095	6.16195	4.85461	1.4277	2.93728	5.87103	4.07914	1.95206	1.9103	5.72775
ENSMUSG00000008604	461.032	508.23	465.022	483.134	469.702	571.185	503.067	476.095	505.594	433.301	391.723	336.913	313.233	478.095	508.007	494.919	368.792	465.022	483.134	503.067	364.318
ENSMUSG00000008658	0	0	0	0	0	0	0	0	0	0	0	0	0	0	0	0	0	0	0	0	0
ENSMUSG00000008668	288.62	298.794	305.12	1.95206	0	0	0	2.02164	1.27354	41.3396	27.35	15.7313	17.4589	297.511	0.650686	1.09839	25.47	298.794	0	1.27354	22.4044
ENSMUSG00000008682	31.9001	41.8871	40.7914	0	1.16551	0	4.71257	3.03245	0.636768	1.5311	1.76452	0	2.05398	38.1929	0.388505	2.79393	1.3374	40.7914	0	3.03245	1.64781
ENSMUSG00000008683	87.3455	162.894	108.505	64.4179	79.255	82.4599	95.4296	183.969	152.188	91.8659	79.4032	115.363	149.941	119.582	75.3776	143.862	109.143	108.505	79.255	152.188	103.615
ENSMUSG00000008690	216.465	215.951	239.853	224.487	159.675	171.959	319.277	306.278	282.725	200.574	214.389	280.542	209.506	224.09	185.374	302.76	226.253	216.465	171.959	306.278	211.948
ENSMUSG00000008730	765.602	605.966	793.801	1250.29	1720.3	1836.24	540.768	718.691	766.032	477.702	535.531	634.497	665.491	721.79	1602.28	675.164	578.305	765.602	1720.3	718.691	585.014
ENSMUSG00000008734	29.6215	6.51577	9.78994	10.7363	16.3172	8.04486	8.247	6.06491	5.09414	3.0622	2.64677	3.93284	5.13496	15.3091	11.6995	6.46869	3.69419	9.78994	10.7363	6.06491	3.49752
ENSMUSG00000008763	338.749	300.656	385.071	221.558	353.151	341.907	316.921	348.732	403.711	182.201	243.503	323.803	259.829	341.492	305.539	356.455	252.334	338.749	341.907	348.732	251.666
ENSMUSG00000008789	0	0	0	0	0	0	0	0	0	0	0	0	0	0	0	0	0	0	0	0	0
ENSMUSG00000008813	0.759526	0	1.63166	0	3.49654	1.00561	0	2.02164	0.636768	0	0	1.31095	1.02699	0.797061	1.50072	0.886134	0.584484	0.759526	1.00561	0.636768	0.513496
ENSMUSG00000008822	39.4953	49.3337	47.318	5.85617	9.32411	16.0897	45.9476	43.4652	29.9281	70.4305	71.4629	64.2363	61.6195	45.3823	10.4233	39.7803	66.9373	47.318	9.32411	43.4652	67.3334
ENSMUSG00000008843	0	0	0	0	0	0	0	2.02164	0	0	0	0	0	0	0	0.673878	0	0	0	0	0
ENSMUSG00000008845	103.296	49.3337	51.3972	74.1782	71.0964	70.3926	0	17.1839	9.55152	6.12439	3.52903	2.62189	0	68.0088	71.889	8.91181	3.06883	51.3972	71.0964	9.55152	3.07546
ENSMUSG00000008855	456.475	539.878	414.441	608.066	427.744	517.888	831.769	554.939	460.383	358.277	412.897	332.98	356.366	470.265	517.899	615.697	365.13	456.475	517.888	554.939	357.322
ENSMUSG00000008859	294.696	326.719	336.937	149.332	228.441	241.346	230.916	213.283	307.559	251.1	274.382	264.811	269.072	319.451	206.373	250.586	264.841	326.719	228.441	230.916	266.941
ENSMUSG00000008874	0	0	0	0	0	0	0	0	0	0	0	0	0	0	0	0	0	0	0	0	0
ENSMUSG00000008892	228.617	322.996	255.354	174.709	181.82	220.228	161.406	213.283	259.801	173.014	180.863	280.542	272.153	268.989	192.252	211.497	226.643	255.354	181.82	213.283	226.508
ENSMUSG00000008932	0	0	0.815828	2.92809	2.33103	2.01122	0	3.03245	0	12.2488	9.70484	6.55473	2.05398	0.271943	2.42344	1.01082	7.64058	0	2.33103	0	8.12978
ENSMUSG00000008958	116.967	155.448	108.505	77.1062	53.6137	67.3757	110.745	129.385	102.52	290.909	184.392	156.002	175.616	126.973	66.0319	114.217	201.73	116.967	67.3757	110.745	180.004
ENSMUSG00000008976	512.68	395.6	527.841	413.836	491.847	482.692	188.503	183.969	201.219	212.823	277.029	336.913	294.747	478.707	462.792	191.23	280.378	512.68	482.692	188.503	285.888
ENSMUSG00000008999	25.8239	19.5473	26.1065	60.5138	26.8068	40.2243	296.892	159.709	231.784	186.794	198.508	153.381	120.158	23.8259	42.515	229.462	164.71	25.8239	40.2243	231.784	170.087
ENSMUSG00000009013	76.7121	115.422	90.5569	46.8494	67.5998	97.544	68.3323	63.6815	84.0534	76.5549	49.4064	49.8159	54.4306	94.2304	70.6644	72.0224	57.552	90.5569	67.5998	68.3323	52.1232
ENSMUSG00000009030	250.644	252.253	253.723	192.278	219.117	210.172	181.434	234.51	203.766	108.708	104.989	209.751	202.317	252.206	207.189	206.57	156.441	252.253	210.172	203.766	155.513
ENSMUSG00000009035	389.637	429.11	420.151	361.13	285.551	220.228	607.922	516.528	319.021	832.917	1184.87	677.759	497.064	412.966	288.97	481.157	798.153	420.151	285.551	516.528	755.338
ENSMUSG00000009047	0	0	0	0	0	0	0	0	0	0	0	0	0	0	0	0	0	0	0	0	0
ENSMUSG00000009070	0	1.86165	0	0	0	0	0	1.01082	0.636768	3.0622	0	1.31095	0	0.620549	0	0.549195	1.09329	0	0	0.636768	0.655473
ENSMUSG00000009073	318.241	362.09	265.96	480.206	412.592	551.073	234.451	244.618	304.375	292.44	300.85	314.627	278.315	315.431	481.29	261.148	296.558	318.241	480.206	244.618	296.645
ENSMUSG00000009075	3.0381	0	1.63166	1.95206	1.16551	6.03365	0	0	0	0	0	0	0	1.55659	3.05041	0	0	1.63166	1.95206	0	0
ENSMUSG00000009076	40.2549	54.9186	30.1856	16.5925	25.6413	20.1122	18.8503	30.3245	22.9237	79.6171	134.103	86.5224	131.455	41.7864	20.782	24.0328	107.924	40.2549	20.1122	22.9237	108.989
ENSMUSG00000009079	564.328	921.516	828.065	560.24	448.723	456.546	551.371	1321.14	604.293	1160.57	1528.07	921.594	1012.61	771.303	488.503	825.601	1155.71	828.065	456.546	604.293	1086.59
ENSMUSG00000009090	643.318	625.514	679.585	754.47	703.971	637.555	1224.09	1117.96	1134.72	906.41	1040.18	1119.55	1268.34	649.472	698.665	1158.93	1083.62	643.318	703.971	1134.72	1079.86
ENSMUSG00000009092	22.0263	17.6857	36.7123	8.78426	9.32411	8.04486	9.42515	16.1731	7.64122	9.18659	55.5822	5.24378	7.18895	25.4747	8.71774	11.0798	19.3004	22.0263	8.78426	9.42515	8.18777
ENSMUSG00000009093	0	0	0	0	0	0	0	0	0	0	0	0	0	0	0	0	0	0	0	0	0
ENSMUSG00000009097	1.51905	0.930824	0	2.92809	3.49654	1.00561	0	0	0	0	0	0	0	0.816625	2.47675	0	0	0.930824	2.92809	0	0
ENSMUSG00000009108	6.07621	5.58494	10.6058	19.5206	24.4758	29.1626	9.42515	12.1298	13.3721	45.9329	44.9952	65.5473	69.8355	7.42231	24.3863	11.6424	56.5777	6.07621	24.4758	12.1298	55.7401
ENSMUSG00000009112	473.944	334.166	404.651	383.579	435.902	445.484	473.614	440.716	410.079	456.267	420.837	343.468	414.905	404.254	421.655	441.47	408.869	404.651	435.902	440.716	417.871
ENSMUSG00000009114	0	0	0	0.976028	0	0	0	0	0	0	0	0	0	0	0.325343	0	0	0	0	0	0
ENSMUSG00000009115	28.862	20.4781	32.6331	72.2261	87.4136	65.3645	18.8503	39.4219	10.8251	96.4592	79.4032	111.43	77.0244	27.3244	75.0014	23.0324	91.0793	28.862	72.2261	18.8503	87.9312
ENSMUSG00000009145	149.627	176.857	141.138	302.569	207.462	256.43	359.334	221.369	225.416	375.119	432.306	325.114	258.802	155.874	255.487	268.706	347.835	149.627	256.43	225.416	350.117
ENSMUSG00000009185	0.759526	0	0.815828	0	0	0	0	0	0	9.18659	18.5274	7.86567	16.4319	0.525118	0	0	13.0029	0.759526	0	0	12.8092
ENSMUSG00000009207	37.9763	24.2014	30.1856	12.6884	34.9654	23.129	15.3159	21.2272	19.7398	7.65549	7.05806	18.3532	24.6478	30.7878	23.5943	18.7609	14.4286	30.1856	23.129	19.7398	13.0044
ENSMUSG00000009210	1.51905	0	1.63166	0	0	1.00561	0	0	0	0	0.882258	2.62189	3.08098	1.05024	0.335203	0	1.64628	1.51905	0	0	1.75207
ENSMUSG00000009214	0	0	0	0	0	0	0	0	0.636768	0	0	0	1.02699	0	0	0.212256	0.256748	0	0	0	0
ENSMUSG00000009216	0	0	0	0.976028	1.16551	0	0	0	0	3.0622	1.76452	0	1.02699	0	0.713848	0	1.46343	0	0.976028	0	1.39575
ENSMUSG00000009246	0	0	0	2.92809	2.33103	3.01682	0	0	0	0	0.882258	0	0	0	2.75865	0	0.220564	0	2.92809	0	0
ENSMUSG00000009248	0	0	0	0	0	0	0	1.01082	0	4.59329	0.882258	2.62189	2.05398	0	0	0.336939	2.53786	0	0	0	2.33794
ENSMUSG00000009281	2138.07	3607.87	2839.08	3036.42	2271.59	2697.04	1969.86	2180.33	2024.92	4695.88	7126	5473.2	4705.68	2861.67	2668.35	2058.37	5500.19	2839.08	2697.04	2024.92	5089.44
ENSMUSG00000009291	3365.46	3536.2	3463.19	2285.86	2227.3	2252.56	2716.8	2337.01	2748.29	2932.05	2890.28	2829.02	2948.49	3454.95	2255.24	2600.7	2899.96	3463.19	2252.56	2716.8	2911.16
ENSMUSG00000009292	49.3692	14.8932	25.2907	39.0411	48.9516	32.1795	10.6033	22.238	26.7443	29.0909	15.8806	24.908	40.0527	29.851	40.0574	19.8618	27.483	25.2907	39.0411	22.238	26.9994
ENSMUSG00000009293	261.277	311.826	301.856	397.244	346.158	454.535	500.711	547.863	525.334	254.162	255.855	281.853	333.772	291.653	399.312	524.636	281.411	301.856	397.244	525.334	268.854
ENSMUSG00000009350	0.759526	0	0	0	0	0	2.35629	9.09736	1.9103	0	0	0	0	0.253175	0	4.45465	0	0	0	2.35629	0
ENSMUSG00000009356	0	0	0	0	0	0	0	0	0	0	0.882258	0	1.02699	0	0	0	0.477313	0	0	0	0.441129
ENSMUSG00000009376	618.254	613.413	787.274	916.491	1493.02	1408.86	862.401	897.606	1144.27	568.037	631.697	878.333	652.14	672.98	1272.79	968.093	682.552	618.254	1408.86	897.606	641.918
ENSMUSG00000009378	442.044	377.914	513.972	828.648	883.46	747.167	948.406	640.858	951.968	307.751	247.032	512.579	518.631	444.643	819.758	847.077	396.498	442.044	828.648	948.406	410.165
ENSMUSG00000009394	0.759526	0	0.815828	0	0	0	0	0	0	0	0	1.31095	0	0.525118	0	0	0.327736	0.759526	0	0	0
ENSMUSG00000009406	50.1287	63.296	44.0547	42.9452	73.4274	80.4486	57.729	88.952	52.215	122.488	74.1097	70.791	48.2686	52.4932	65.6071	66.2987	78.9143	50.1287	73.4274	57.729	72.4503
ENSMUSG00000009418	69.8764	86.5666	62.0029	48.8014	74.5929	43.2411	174.365	240.575	178.295	111.77	80.2855	85.2114	118.104	72.8153	55.5452	197.745	98.8428	69.8764	48.8014	178.295	98.4908
ENSMUSG00000009470	694.207	577.111	664.084	657.843	934.743	856.778	481.861	513.495	629.764	365.932	402.31	591.236	581.278	645.134	816.455	541.707	485.189	664.084	856.778	513.495	491.794
ENSMUSG00000009471	0	0	0	0	0	0	0	0	0	0	0	0	0	0	0	0	0	0	0	0	0
ENSMUSG00000009487	0	0	0	0	0	0	0	0	0	0	0	0	0	0	0	0	0	0	0	0	0
ENSMUSG00000009535	162.539	137.762	184.377	162.997	157.344	194.082	101.32	144.547	150.914	108.708	120.869	145.515	148.914	161.559	171.475	132.26	131.002	162.539	162.997	144.547	133.192
ENSMUSG00000009545	14.431	8.37741	12.2374	7.80823	18.6482	10.0561	5.89072	13.1406	19.103	12.2488	21.1742	15.7313	21.5668	11.6819	12.1708	12.7115	17.6803	12.2374	10.0561	13.1406	18.4528
ENSMUSG00000009549	271.151	315.549	301.041	253.767	228.441	235.312	269.795	209.239	313.29	277.129	269.089	292.341	328.637	295.914	239.173	264.108	291.799	301.041	235.312	269.795	284.735
ENSMUSG00000009555	317.482	301.587	265.96	460.685	252.917	299.671	366.403	303.245	326.662	192.918	266.442	249.08	191.021	295.01	337.758	332.103	224.865	301.587	299.671	326.662	220.999
ENSMUSG00000009563	300.013	346.266	279.829	223.51	189.979	203.133	579.647	410.392	349.586	465.454	620.227	466.696	416.959	308.703	205.541	446.541	492.334	300.013	203.133	410.392	466.075
ENSMUSG00000009566	430.651	391.877	345.095	486.062	519.819	596.326	280.398	570.101	397.343	298.564	359.961	305.45	550.468	389.208	534.069	415.948	378.611	391.877	519.819	397.343	332.706
ENSMUSG00000009569	126.081	57.7111	99.531	198.134	560.612	472.636	97.7859	494.29	203.766	199.043	127.927	175.667	273.18	94.4411	410.461	265.281	193.954	99.531	472.636	203.766	187.355
ENSMUSG00000009575	362.294	351.851	379.36	338.682	576.93	517.888	255.657	314.364	358.5	113.301	168.511	195.331	233.127	364.502	477.833	309.507	177.568	362.294	517.888	314.364	181.921
ENSMUSG00000009580	0	0	0	0	0	0	0	0	0	0	0	0	0	0	0	0	0	0	0	0	0
ENSMUSG00000009585	31.9001	17.6857	18.764	18.5445	15.1517	11.0617	49.482	16.1731	32.4752	24.4976	4.41129	20.9751	15.4049	22.7833	14.9193	32.7101	16.3222	18.764	15.1517	32.4752	18.19
ENSMUSG00000009588	0	0	0	0	0	0	0	0	0	0	0	0	0	0	0	0	0	0	0	0	0
ENSMUSG00000009596	0	0	0	0	0	0	0	2.02164	0	0	0	0	0	0	0	0.673878	0	0	0	0	0
ENSMUSG00000009614	10411.6	11319.7	10542.1	9784.68	5791.44	5121.56	4406.26	4920.66	6444.73	11614.9	12271.3	11618.9	10216.5	10757.8	6899.23	5257.22	11430.4	10542.1	5791.44	4920.66	11616.9
ENSMUSG00000009621	396.473	434.695	366.307	541.696	518.654	500.793	693.927	562.015	607.477	621.626	554.058	587.303	544.306	399.158	520.381	621.139	576.823	396.473	518.654	607.477	570.681
ENSMUSG00000009628	0	0	0	0	0	0	0	0	0	0	0	0	0	0	0	0	0	0	0	0	0
ENSMUSG00000009630	335.71	330.442	334.49	305.497	261.075	294.643	345.196	227.434	262.985	185.263	166.747	228.104	256.748	333.547	287.072	278.538	209.216	334.49	294.643	262.985	206.684
ENSMUSG00000009633	885.607	1111.4	753.825	98.5789	358.978	674.763	645.623	1668.86	431.729	364.401	321.142	452.276	1223.15	916.945	377.44	915.404	590.242	885.607	358.978	645.623	408.339
ENSMUSG00000009640	109.372	133.108	127.269	104.435	76.9239	74.415	101.32	114.222	105.703	162.296	209.977	167.801	185.886	123.25	85.258	107.082	181.49	127.269	76.9239	105.703	176.843
ENSMUSG00000009646	499.768	497.991	442.179	490.942	406.765	441.462	612.635	541.798	504.957	506.793	467.597	488.982	504.253	479.979	446.39	553.13	491.906	497.991	441.462	541.798	496.618
ENSMUSG00000009647	459.513	558.494	437.284	269.384	306.53	274.531	197.928	195.088	235.604	571.099	641.402	475.873	486.794	485.097	283.482	209.54	543.792	459.513	274.531	197.928	528.947
ENSMUSG00000009654	206.591	216.882	219.458	267.432	200.468	211.178	239.163	207.218	165.56	215.885	209.977	183.532	196.156	214.31	226.359	203.98	201.387	216.882	211.178	207.218	203.066
ENSMUSG00000009670	0	0	0	0	0	0	0	0	0	0	0	0	0	0	0	0	0	0	0	0	0
ENSMUSG00000009681	407.865	503.576	380.176	593.425	560.612	561.129	928.377	763.167	795.96	662.965	694.337	614.833	545.333	430.539	571.722	829.168	629.367	407.865	561.129	795.96	638.899
ENSMUSG00000009687	26.5834	26.0631	18.764	7.80823	10.4896	8.04486	4.71257	15.1623	7.64122	18.3732	35.2903	15.7313	16.4319	23.8035	8.78091	9.17202	21.4567	26.0631	8.04486	7.64122	17.4025
ENSMUSG00000009731	3.79763	3.7233	4.89497	0.976028	2.33103	5.02804	2.35629	5.05409	3.18384	6.12439	6.17581	5.24378	3.08098	4.13863	2.77837	3.53141	5.15624	3.79763	2.33103	3.18384	5.68409
ENSMUSG00000009733	64.5597	109.837	94.6361	108.339	100.234	128.718	175.543	89.9628	159.829	88.8037	83.8145	91.7662	97.5643	89.6777	112.43	141.778	90.4871	94.6361	108.339	159.829	90.2849
ENSMUSG00000009734	0	0	0	0	0	0	0	1.01082	0	0	0	0	0	0	0	0.336939	0	0	0	0	0
ENSMUSG00000009739	78.9907	88.4283	82.3986	103.459	68.7653	90.5047	127.24	131.406	173.201	56.6506	41.4661	41.9502	39.0257	83.2725	87.5764	143.949	44.7732	82.3986	90.5047	131.406	41.7082
ENSMUSG00000009741	685.852	675.778	693.454	592.449	609.564	693.869	427.666	390.176	482.67	672.152	596.406	487.672	552.522	685.028	631.961	433.504	577.188	685.852	609.564	427.666	574.464
ENSMUSG00000009772	102.536	161.963	176.219	268.408	207.462	218.217	272.151	142.525	212.681	303.157	224.976	186.154	79.0784	146.906	231.362	209.119	198.341	161.963	218.217	212.681	205.565
ENSMUSG00000009828	189.122	226.19	159.902	357.226	397.44	399.226	367.581	361.873	325.388	297.033	322.906	199.264	237.235	191.738	384.631	351.614	264.11	189.122	397.44	361.873	267.134
ENSMUSG00000009863	1585.89	1816.97	1662.66	1921.8	1297.22	1453.1	1581.07	1544.53	1775.95	2374.73	1962.14	2342.66	2611.64	1688.51	1557.37	1633.85	2322.79	1662.66	1453.1	1581.07	2358.7
ENSMUSG00000009876	0	0.930824	0	5.85617	1.16551	0	0	1.01082	0.636768	0	0.882258	0	2.05398	0.310275	2.34056	0.549195	0.734061	0	1.16551	0.636768	0.441129
ENSMUSG00000009894	824.086	744.659	831.329	697.86	684.157	685.825	961.365	892.552	1177.38	551.195	599.053	528.311	546.36	800.025	689.281	1010.43	556.23	824.086	685.825	961.365	548.778
ENSMUSG00000009900	0	0	0	0	0	0	0	0	0	0	0	0	0	0	0	0	0	0	0	0	0
ENSMUSG00000009905	374.446	250.392	232.511	420.668	439.399	491.742	764.615	1025.98	645.046	350.621	457.892	507.336	433.391	285.783	450.603	811.88	437.31	250.392	439.399	764.615	445.641
ENSMUSG00000009907	185.324	151.724	171.324	211.798	240.096	200.116	260.37	251.694	288.456	70.4305	52.0532	85.2114	98.5912	169.458	217.337	266.84	76.5716	171.324	211.798	260.37	77.821
ENSMUSG00000009927	224.06	259.7	265.144	468.494	487.185	493.754	308.674	571.112	265.532	355.215	333.493	356.577	365.609	249.635	483.144	381.773	352.724	259.7	487.185	308.674	355.896
ENSMUSG00000009941	0	0	0	0	0	0	0	0	0	0	0	0	0	0	0	0	0	0	0	0	0
ENSMUSG00000009995	402.549	515.676	432.389	395.291	326.344	323.806	345.196	286.061	353.406	330.717	410.25	289.719	333.772	450.205	348.48	328.221	341.115	432.389	326.344	345.196	332.245
ENSMUSG00000010021	3.0381	0.930824	1.63166	0.976028	1.16551	0	44.7695	17.1839	15.9192	22.9665	19.4097	10.4876	23.6208	1.86686	0.713848	25.9575	19.1211	1.63166	0.976028	17.1839	21.1881
ENSMUSG00000010025	1823.62	758.621	1267.8	458.733	726.115	468.613	1352.51	1316.08	1063.4	1137.61	1452.2	1591.49	1545.62	1283.35	551.154	1244	1431.73	1267.8	468.613	1316.08	1498.91
ENSMUSG00000010044	3.79763	7.44659	1.63166	1.95206	0	4.02243	1.17814	2.02164	1.27354	18.3732	22.9387	17.0423	8.21594	4.29196	1.9915	1.4911	16.6425	3.79763	1.95206	1.27354	17.7077
ENSMUSG00000010045	244.567	237.36	242.301	366.987	192.31	219.223	573.756	352.775	307.559	405.741	346.727	304.139	241.343	241.409	259.506	411.363	324.488	242.301	219.223	352.775	325.433
ENSMUSG00000010047	506.604	488.683	398.94	545.6	315.854	367.047	1003.78	750.027	480.76	597.128	646.695	426.057	594.628	464.742	409.5	744.855	566.127	488.683	367.047	750.027	595.878
ENSMUSG00000010048	419.258	399.323	419.336	310.377	230.772	218.217	438.269	303.245	312.653	402.679	468.479	483.739	297.828	412.639	253.122	351.389	413.181	419.258	230.772	312.653	435.579
ENSMUSG00000010051	279.506	239.222	276.566	249.863	391.613	328.834	360.512	585.263	483.307	794.64	1004.01	629.254	714.787	265.098	323.437	476.361	785.672	276.566	328.834	483.307	754.713
ENSMUSG00000010054	346.344	455.173	340.2	418.716	285.551	344.924	483.039	286.061	345.765	607.846	508.181	357.888	325.557	380.572	349.73	371.622	449.868	346.344	344.924	345.765	433.034
ENSMUSG00000010057	183.805	208.505	181.93	143.476	128.207	121.679	86.0045	117.255	105.703	324.593	391.723	253.012	205.398	191.413	131.12	102.988	293.682	183.805	128.207	105.703	288.803
ENSMUSG00000010064	17912.7	20512.6	18853.8	30536	15302	14701	18831.4	13896.7	17533.4	37268.5	34538.6	26454.9	17908.7	19093	20179.7	16753.9	29042.7	18853.8	15302	17533.4	30496.8
ENSMUSG00000010066	2.27858	0	0	0	0	0	0	1.01082	0	1.5311	0.882258	2.62189	1.02699	0.759526	0	0.336939	1.51556	0	0	0	1.27904
ENSMUSG00000010067	18.9881	15.824	11.4216	26.3528	17.4827	9.05047	17.6722	42.4543	39.4796	38.2774	37.9371	18.3532	37.9987	15.4112	17.6287	33.202	33.1416	15.824	17.4827	39.4796	37.9679
ENSMUSG00000010080	3.0381	8.37741	0.815828	0.976028	4.66206	4.02243	3.53443	1.01082	3.18384	3.0622	5.29355	0	2.05398	4.07712	3.22017	2.57636	2.60243	3.0381	4.02243	3.18384	2.55809
ENSMUSG00000010086	0	0	0	0	0	0	0	0	0	1.5311	0	0	0	0	0	0	0.382774	0	0	0	0
ENSMUSG00000010095	385.839	507.299	463.39	380.651	299.537	293.638	458.298	687.356	463.567	600.19	701.395	639.741	625.438	452.176	324.609	536.407	641.691	463.39	299.537	463.567	632.59
ENSMUSG00000010097	356.977	394.669	330.41	407.98	410.261	520.905	273.329	271.91	298.644	419.521	366.137	222.861	252.64	360.686	446.382	281.294	315.29	356.977	410.261	273.329	309.389
ENSMUSG00000010110	431.411	604.105	442.995	615.874	534.971	502.804	478.326	490.247	638.678	563.444	689.926	627.943	594.628	492.837	551.216	535.75	618.985	442.995	534.971	490.247	611.286
ENSMUSG00000010122	1212.2	1143.98	1217.22	1069.73	1019.83	1044.83	91.8952	89.9628	158.555	904.879	1003.13	1136.59	1155.37	1191.13	1044.79	113.471	1049.99	1212.2	1044.83	91.8952	1069.86
ENSMUSG00000010136	0	0	0	0	0	0	0	0	0	0	0	0	0	0	0	0	0	0	0	0	0
ENSMUSG00000010142	1.51905	1.86165	4.07914	3.90411	0	1.00561	2.35629	6.06491	4.45738	0	0.882258	2.62189	2.05398	2.48661	1.63657	4.29286	1.38953	1.86165	1.00561	4.45738	1.46812
ENSMUSG00000010154	0	0	0	0	0	0	0	0	0	13.7799	0.882258	6.55473	5.13496	0	0	0	6.58796	0	0	0	5.84484
ENSMUSG00000010175	740.538	911.277	1318.38	1017.02	1772.75	1384.72	1279.46	1185.69	1295.19	927.845	771.093	1086.77	1074.23	990.064	1391.5	1253.45	964.986	911.277	1384.72	1279.46	1001.04
ENSMUSG00000010205	309.127	434.695	362.228	325.017	203.965	172.965	445.338	363.894	331.756	463.923	376.724	209.751	211.56	368.683	233.982	380.33	315.49	362.228	203.965	363.894	294.142
ENSMUSG00000010277	1516.77	1297.57	1366.51	1924.73	3137.56	2939.39	1107.45	1319.12	1477.94	835.979	757.86	1343.72	1159.47	1393.62	2667.23	1301.5	1024.26	1366.51	2939.39	1319.12	997.727
ENSMUSG00000010290	129.879	110.768	105.242	126.884	165.503	185.032	84.8263	85.9195	98.699	59.7128	55.5822	85.2114	92.4293	115.296	159.14	89.815	73.2339	110.768	165.503	85.9195	72.4621
ENSMUSG00000010307	62.2811	90.2899	65.2662	95.6508	54.7792	56.314	1361.93	703.529	379.514	82.6793	141.161	148.137	90.3753	72.6124	68.9147	814.992	115.588	65.2662	56.314	703.529	115.768
ENSMUSG00000010311	0	0.930824	1.63166	0.976028	1.16551	0	0	1.01082	0	0	4.41129	0	1.02699	0.85416	0.713848	0.336939	1.35957	0.930824	0.976028	0	0.513496
ENSMUSG00000010342	0	0	0.815828	0	0	0	11.7814	2.02164	3.82061	0	0	0	0	0.271943	0	5.87456	0	0	0	3.82061	0
ENSMUSG00000010358	247.605	387.223	331.226	170.805	128.207	112.628	246.232	255.737	280.178	272.535	337.023	332.98	370.744	322.018	137.213	260.716	328.321	331.226	128.207	255.737	335.001
ENSMUSG00000010362	57.724	76.3276	73.4245	43.9213	47.7861	40.2243	14.1377	13.1406	12.7354	22.9665	24.7032	24.908	18.4859	69.1587	43.9772	13.3379	22.7659	73.4245	43.9213	13.1406	23.8348
ENSMUSG00000010376	355.458	573.387	413.625	327.946	283.22	278.553	296.892	490.247	482.033	842.104	584.055	520.445	534.036	447.49	296.573	423.057	620.16	413.625	283.22	482.033	559.045
ENSMUSG00000010392	441.285	470.997	438.1	475.326	430.075	463.585	258.013	372.992	403.074	427.176	481.713	454.898	458.039	450.127	456.329	344.693	455.456	441.285	463.585	372.992	456.468
ENSMUSG00000010406	72.9145	176.857	94.6361	69.298	83.917	59.3309	47.1257	55.595	61.1297	153.11	91.7548	41.9502	74.9704	114.802	70.8486	54.6168	90.4463	94.6361	69.298	55.595	83.3626
ENSMUSG00000010435	0	0	0	0	0	0	0	0	0	0	0	0	0	0	0	0	0	0	0	0	0
ENSMUSG00000010453	638.002	546.394	571.895	614.898	553.619	624.483	345.196	301.224	407.532	473.109	513.474	498.159	510.415	585.43	597.667	351.317	498.789	571.895	614.898	345.196	504.287
ENSMUSG00000010461	0.759526	0	3.26331	0	0	1.00561	0	0	0	0	0	0	0	1.34095	0.335203	0	0	0.759526	0	0	0
ENSMUSG00000010476	0	0	3.26331	0.976028	1.16551	0	0	0	0	1.5311	0	0	0	1.08777	0.713848	0	0.382774	0	0.976028	0	0
ENSMUSG00000010505	0	0	0	0	0	0	0	0	0	1.5311	0	0	0	0	0	0	0.382774	0	0	0	0
ENSMUSG00000010517	262.036	264.354	256.986	231.319	265.737	310.733	346.374	210.25	366.142	217.416	178.216	222.861	294.747	261.125	269.263	307.589	228.31	262.036	265.737	346.374	220.138
ENSMUSG00000010529	0	0	0	0	0	0	0	2.02164	0	0	0	0	0	0	0	0.673878	0	0	0	0	0
ENSMUSG00000010538	13.6715	14.8932	13.0532	8.78426	5.82757	7.03926	3.53443	2.02164	1.9103	7.65549	11.4694	5.24378	6.16195	13.8726	7.21703	2.48879	7.63264	13.6715	7.03926	2.02164	6.90872
ENSMUSG00000010554	158.741	161.033	150.928	130.788	184.151	178.998	173.187	119.276	141.363	160.765	137.632	148.137	146.86	156.901	164.646	144.609	148.349	158.741	178.998	141.363	147.498
ENSMUSG00000010592	0.759526	1.86165	0	0.976028	2.33103	0	0	0	0	1.5311	2.64677	1.31095	3.08098	0.873725	1.10235	0	2.14245	0.759526	0.976028	0	2.08894
ENSMUSG00000010601	1269.17	1437.19	1790.74	692.004	902.108	783.369	871.826	708.583	876.193	949.281	1048.12	1135.28	928.401	1499.03	792.494	818.867	1015.27	1437.19	783.369	871.826	998.702
ENSMUSG00000010607	198.236	222.467	164.797	271.336	144.524	156.875	193.216	322.451	177.658	309.282	272.618	260.878	212.587	195.167	190.912	231.108	263.841	198.236	156.875	193.216	266.748
ENSMUSG00000010608	589.392	557.563	562.106	378.699	531.475	523.922	415.885	332.559	359.137	321.531	380.253	447.032	361.501	569.687	478.032	369.194	377.579	562.106	523.922	359.137	370.877
ENSMUSG00000010609	2484.41	3451.49	2430.35	553.408	606.067	393.193	605.566	602.447	561.629	525.167	702.277	606.968	568.954	2788.75	517.556	589.881	600.841	2484.41	553.408	602.447	587.961
ENSMUSG00000010651	7675.77	4745.34	4796.25	2162.88	1953.4	1937.81	3800.69	4149.41	2715.82	494.545	650.224	658.094	553.549	5739.12	2018.03	3555.3	589.103	4796.25	1953.4	3800.69	601.886
ENSMUSG00000010660	3.79763	2.79247	4.89497	6.8322	1.16551	5.02804	25.9192	28.3029	14.0089	10.7177	22.9387	15.7313	7.18895	3.82836	4.34192	22.7436	14.1442	3.79763	5.02804	25.9192	13.2245
ENSMUSG00000010663	7691.72	9275.66	7907.01	7941.94	7306.61	6308.18	7782.82	5968.88	6703.26	13914.6	15692.7	16958.4	12633	8291.46	7185.58	6818.32	14799.7	7907.01	7306.61	6703.26	14803.7
ENSMUSG00000010721	53.1668	35.3713	53.8447	60.5138	58.2757	74.415	55.3727	31.3353	33.1119	19.9043	20.2919	30.1517	23.6208	47.4609	64.4015	39.94	23.4922	53.1668	60.5138	33.1119	21.9564
ENSMUSG00000010751	6.07621	1.86165	0.815828	3.90411	6.99309	1.00561	0	0	0.636768	0	0	0	0	2.91789	3.9676	0.212256	0	1.86165	3.90411	0	0
ENSMUSG00000010755	262.036	228.983	266.776	141.524	210.958	188.049	181.434	151.623	150.277	128.612	150.866	153.381	148.914	252.598	180.177	161.111	145.443	262.036	188.049	151.623	149.89
ENSMUSG00000010760	0	0	0.815828	2.92809	10.4896	7.03926	31.8099	20.2164	10.8251	81.1482	63.5226	41.9502	31.8368	0.271943	6.81899	20.9504	54.6144	0	7.03926	20.2164	52.7364
ENSMUSG00000010796	0	0	0	0.976028	0	0	2.35629	2.02164	0	0	0	0	0	0	0.325343	1.45931	0	0	0	2.02164	0
ENSMUSG00000010797	28.1025	26.9939	25.2907	24.4007	32.6344	14.0785	36.5224	25.2704	41.3899	18.3732	38.8193	39.3284	31.8368	26.7957	23.7045	34.3943	32.0894	26.9939	24.4007	36.5224	35.3281
ENSMUSG00000010803	0	0	0	0.976028	0	4.02243	0	0	0	0	0	0	0	0	1.66615	0	0	0	0.976028	0	0
ENSMUSG00000010825	0	0	0	1.95206	1.16551	0	0	1.01082	0	1.5311	1.76452	0	1.02699	0	1.03919	0.336939	1.08065	0	1.16551	0	1.27904
ENSMUSG00000010830	3.0381	0.930824	3.26331	4.88014	2.33103	2.01122	0	4.04327	4.45738	21.4354	24.7032	15.7313	17.4589	2.41075	3.07413	2.83355	19.8322	3.0381	2.33103	4.04327	19.4471
ENSMUSG00000010841	0	0	0	0	0	0	0	0	0	0	0	0	0	0	0	0	0	0	0	0	0
ENSMUSG00000010911	126.841	153.586	139.507	84.9145	94.4067	80.4486	115.458	123.32	133.721	114.832	113.811	103.565	147.887	139.978	86.5899	124.166	120.024	139.507	84.9145	123.32	114.322
ENSMUSG00000010914	244.567	241.083	276.566	219.606	223.779	215.2	458.298	340.646	322.841	176.076	177.334	200.575	267.018	254.072	219.528	373.928	205.251	244.567	219.606	340.646	188.954
ENSMUSG00000010936	300.013	265.285	258.617	225.463	195.806	172.965	307.495	255.737	221.595	710.429	709.335	512.579	681.923	274.638	198.078	261.609	653.567	265.285	195.806	255.737	695.629
ENSMUSG00000011008	3.0381	0	1.63166	0.976028	5.82757	4.02243	0	2.02164	2.54707	6.12439	4.41129	3.93284	6.16195	1.55659	3.60868	1.5229	5.15762	1.63166	4.02243	2.02164	5.26784
ENSMUSG00000011034	19.7477	15.824	26.9223	25.3767	30.3034	25.1402	10.6033	27.2921	7.64122	30.622	40.5839	18.3532	42.1067	20.8313	26.9401	15.1789	32.9164	19.7477	25.3767	10.6033	35.6029
ENSMUSG00000011096	402.549	621.79	315.725	316.233	179.489	160.897	726.915	543.82	295.46	649.185	580.526	443.099	396.419	446.688	218.873	522.065	517.307	402.549	179.489	543.82	511.813
ENSMUSG00000011114	438.246	555.702	522.13	517.295	404.433	400.232	805.85	755.081	737.377	552.726	589.348	523.067	579.224	505.359	440.653	766.103	561.091	522.13	404.433	755.081	565.975
ENSMUSG00000011118	0	0	0	0	0	0	0	0	0	0	0	0	0	0	0	0	0	0	0	0	0
ENSMUSG00000011148	148.108	164.756	145.217	222.534	94.4067	117.656	262.726	175.882	198.672	223.54	238.21	234.659	193.075	152.694	144.866	212.427	222.371	148.108	117.656	198.672	229.1
ENSMUSG00000011154	0	0	0	0	0	0	0	0	0	0	0	0	0	0	0	0	0	0	0	0	0
ENSMUSG00000011158	122.284	118.215	106.873	227.415	162.006	231.29	108.389	130.395	98.699	85.7415	82.05	90.4552	116.05	115.791	206.904	112.495	93.5742	118.215	227.415	108.389	88.0983
ENSMUSG00000011171	0	0.930824	0.815828	0	0	0	0	0	0	0	0.882258	0	1.02699	0.582217	0	0	0.477313	0.815828	0	0	0.441129
ENSMUSG00000011179	186.084	244.807	279.829	225.463	242.427	264.475	74.223	102.093	177.658	249.569	334.376	388.04	333.772	236.907	244.121	117.991	326.439	244.807	242.427	102.093	334.074
ENSMUSG00000011254	39.4953	45.6104	26.1065	40.0172	34.9654	20.1122	133.13	110.179	119.076	50.5262	36.1726	27.5298	31.8368	37.0707	31.6983	120.795	36.5164	39.4953	34.9654	119.076	34.0047
ENSMUSG00000011256	22.7858	17.6857	15.5007	15.6165	32.6344	18.1009	3.53443	32.3462	34.3855	12.2488	25.5855	14.4204	19.5129	18.6574	22.1173	23.422	17.9419	17.6857	18.1009	32.3462	16.9666
ENSMUSG00000011257	12.1524	8.37741	6.52662	0	0	0	14.1377	14.1514	15.9192	0	0	0	0	9.01882	0	14.7361	0	8.37741	0	14.1514	0
ENSMUSG00000011263	75.1931	95.8749	80.767	101.507	61.7723	68.3813	81.2919	43.4652	80.8695	79.6171	64.4048	64.2363	57.5116	83.945	77.2202	68.5422	66.4424	80.767	68.3813	80.8695	64.3206
ENSMUSG00000011267	6.07621	5.58494	8.15828	1.95206	4.66206	6.03365	0	1.01082	1.9103	3.0622	0.882258	2.62189	1.02699	6.60648	4.21592	0.973707	1.89833	6.07621	4.66206	1.01082	1.82444
ENSMUSG00000011305	347.863	270.87	295.33	249.863	228.441	355.985	487.751	370.97	246.429	264.88	300.85	279.231	267.018	304.687	278.096	368.384	277.995	295.33	249.863	370.97	273.125
ENSMUSG00000011306	116.967	188.957	171.324	160.069	144.524	123.69	183.79	181.947	152.824	244.976	300.85	163.868	196.156	159.083	142.761	172.854	226.462	171.324	144.524	181.947	220.566
ENSMUSG00000011349	0	0	0	0	0	0	0	0	0.636768	0	0	0	0	0	0	0.212256	0	0	0	0	0
ENSMUSG00000011382	3385.21	3779.14	2963.9	2325.88	2201.66	2193.23	2680.28	3229.56	3365.96	448.612	430.542	350.022	327.611	3376.09	2240.25	3091.93	389.197	3385.21	2201.66	3229.56	390.282
ENSMUSG00000011427	109.372	80.0509	91.3727	119.075	155.013	141.791	69.5105	122.309	82.7798	70.4305	61.7581	70.791	71.8895	93.5984	138.627	91.5331	68.7173	91.3727	141.791	82.7798	70.6108
ENSMUSG00000011463	0	0	0	0.976028	0	2.01122	0	0	1.27354	0	0.882258	0	1.02699	0	0.995748	0.424512	0.477313	0	0.976028	0	0.441129
ENSMUSG00000011486	0	0	0	0.976028	0	0	0	0	0	7.65549	8.82258	0	4.10797	0	0.325343	0	5.14651	0	0	0	5.88173
ENSMUSG00000011589	1.51905	0	0	0.976028	9.32411	1.00561	0	0	1.9103	4.59329	0.882258	3.93284	2.05398	0.506351	3.76858	0.636768	2.86559	0	1.00561	0	2.99341
ENSMUSG00000011632	0	0	0	0	0	0	0	4.04327	0	0	0	0	1.02699	0	0	1.34776	0.256748	0	0	0	0
ENSMUSG00000011658	63.0407	79.12	69.3454	54.6576	44.2895	42.2355	96.6078	67.7248	78.9592	61.2439	50.2887	53.7487	56.4846	70.502	47.0609	81.0973	55.4415	69.3454	44.2895	78.9592	55.1167
ENSMUSG00000011751	0.759526	1.86165	0.815828	0	0	0	0	1.01082	0	0	2.64677	1.31095	4.10797	1.14567	0	0.336939	2.01642	0.815828	0	0	1.97886
ENSMUSG00000011752	138.993	97.7365	147.665	239.127	210.958	245.368	285.111	250.683	331.119	1145.26	1345.44	1151.01	1312.5	128.132	231.818	288.971	1238.55	138.993	239.127	285.111	1231.75
ENSMUSG00000011831	1332.97	1016.46	1303.69	663.699	1521	1350.53	931.912	872.336	1001.64	266.411	276.147	402.46	540.198	1217.71	1178.41	935.294	371.304	1303.69	1350.53	931.912	339.303
ENSMUSG00000011832	47.8501	47.472	54.6605	45.8733	46.6206	42.2355	58.9072	45.4868	50.3047	42.8707	42.3484	62.9254	46.2146	49.9942	44.9098	51.5662	48.5898	47.8501	45.8733	50.3047	44.5427
ENSMUSG00000011837	126.081	139.624	116.663	114.195	97.9032	79.443	121.349	168.807	128.627	91.8659	167.629	89.1443	90.3753	127.456	97.1805	139.594	109.754	126.081	97.9032	128.627	91.1206
ENSMUSG00000011877	151.905	195.473	152.56	170.805	101.4	126.707	398.213	328.516	238.151	428.707	416.426	157.313	209.506	166.646	132.97	321.626	302.988	152.56	126.707	328.516	312.966
ENSMUSG00000011884	37.9763	23.2706	31.0015	54.6576	27.9723	21.1178	43.5913	40.4327	28.0178	41.3396	55.5822	51.1269	44.1607	30.7495	34.5826	37.3473	48.0524	31.0015	27.9723	40.4327	47.6438
ENSMUSG00000011958	360.015	390.946	369.57	244.983	305.365	275.537	193.216	187.001	241.972	208.229	162.335	204.507	232.1	373.51	275.295	207.396	201.793	369.57	275.537	193.216	206.368
ENSMUSG00000011960	260.517	221.536	266.776	259.624	375.296	407.271	187.325	187.001	244.519	171.483	161.453	195.331	217.722	249.61	347.397	206.282	186.497	260.517	375.296	187.325	183.407
ENSMUSG00000012017	53.1668	70.7426	41.6072	52.7055	24.4758	22.1234	48.3039	57.6166	13.3721	38.2774	32.6435	23.597	25.6748	55.1722	33.1016	39.7642	30.0482	53.1668	24.4758	48.3039	29.1592
ENSMUSG00000012042	0	0.930824	0.815828	0.976028	2.33103	3.01682	25.9192	37.4003	19.7398	0	0	0	0	0.582217	2.10796	27.6864	0	0.815828	2.33103	25.9192	0
ENSMUSG00000012076	66.8383	56.7803	57.9238	43.9213	59.4412	61.3421	67.1542	55.595	54.1253	22.9665	20.2919	35.3955	25.6748	60.5141	54.9015	58.9581	26.0822	57.9238	59.4412	55.595	24.3206
ENSMUSG00000012114	358.496	358.367	364.675	629.538	467.371	414.31	437.091	558.982	436.823	468.516	462.303	334.291	247.505	360.513	503.74	477.632	378.154	358.496	467.371	437.091	398.297
ENSMUSG00000012117	353.18	413.286	395.677	328.922	376.461	399.226	413.528	474.073	415.173	306.22	348.492	305.45	326.584	387.381	368.203	434.258	321.686	395.677	376.461	415.173	316.402
ENSMUSG00000012123	44.0525	53.9878	39.1597	18.5445	9.32411	3.01682	4.71257	5.05409	8.91475	0	2.64677	0	1.02699	45.7333	10.2952	6.22714	0.918441	44.0525	9.32411	5.05409	0.513496
ENSMUSG00000012126	0	1.86165	1.63166	3.90411	2.33103	3.01682	0	2.02164	0	0	0	3.93284	0	1.16443	3.08399	0.673878	0.983209	1.63166	3.01682	0	0
ENSMUSG00000012187	28.1025	9.30824	12.2374	0	2.33103	0	223.847	149.601	185.3	0	0	0	0	16.5494	0.77701	186.249	0	12.2374	0	185.3	0
ENSMUSG00000012211	0	2.79247	0.815828	0.976028	0	1.00561	0	0	0	1.5311	0.882258	1.31095	2.05398	1.20277	0.660545	0	1.44457	0.815828	0.976028	0	1.42102
ENSMUSG00000012282	0	0	0	0	0	0	0	0	0	0	0	0	0	0	0	0	0	0	0	0	0
ENSMUSG00000012296	76.7121	67.9501	69.3454	80.0343	69.9309	62.3477	100.142	102.093	60.493	110.239	108.518	53.7487	66.7545	71.3359	70.771	87.5759	84.815	69.3454	69.9309	100.142	87.6361
ENSMUSG00000012350	12.9119	13.9624	7.34245	10.7363	10.4896	14.0785	0	5.05409	1.9103	3.0622	7.05806	14.4204	13.3509	11.4056	11.7682	2.32146	9.47289	12.9119	10.7363	1.9103	10.2045
ENSMUSG00000012396	0	0	0	0	0	0	0	0	0	0	0	0	3.08098	0	0	0	0.770244	0	0	0	0
ENSMUSG00000012405	209.629	223.398	251.275	231.319	291.379	291.626	147.268	114.222	189.12	174.545	182.627	213.684	237.235	228.101	271.441	150.203	202.023	223.398	291.379	147.268	198.156
ENSMUSG00000012422	18.2286	20.4781	15.5007	9.76028	20.9793	15.0841	0	19.2055	9.55152	1.5311	5.29355	1.31095	2.05398	18.0692	15.2746	9.58569	2.54739	18.2286	15.0841	9.55152	1.79254
ENSMUSG00000012428	988.143	782.823	984.704	870.617	827.515	810.52	1026.16	1005.76	986.354	874.257	724.334	991.074	799	918.557	836.218	1006.09	847.166	984.704	827.515	1005.76	836.628
ENSMUSG00000012429	101.776	111.699	119.111	40.0172	78.0895	74.415	70.6886	86.9303	77.6857	62.775	91.7548	86.5224	68.8085	110.862	64.1739	78.4349	77.4652	111.699	74.415	77.6857	77.6654
ENSMUSG00000012443	10.6334	8.37741	12.2374	2.92809	8.1586	3.01682	5.89072	8.08654	14.0089	10.7177	5.29355	11.7985	18.4859	10.4161	4.70117	9.32872	11.5739	10.6334	3.01682	8.08654	11.2581
ENSMUSG00000012483	60.7621	64.2268	60.3713	40.0172	18.6482	33.1851	34.1662	115.233	14.6457	101.052	70.5806	58.9925	51.3496	61.7867	30.6168	54.6817	70.4938	60.7621	33.1851	34.1662	64.7866
ENSMUSG00000012519	42.5335	51.1953	44.0547	17.5685	9.32411	10.0561	47.1257	39.4219	47.1208	33.6842	16.7629	20.9751	19.5129	45.9278	12.3162	44.5562	22.7338	44.0547	10.0561	47.1208	20.244
ENSMUSG00000012520	0	0	0	0	0	0	0	0	0	0	0	0	0	0	0	0	0	0	0	0	0
ENSMUSG00000012535	401.789	432.833	420.151	342.586	452.22	481.686	314.564	356.819	375.693	263.349	307.908	288.408	344.042	418.258	425.497	349.025	300.927	420.151	452.22	356.819	298.158
ENSMUSG00000012609	73.674	76.3276	66.0821	80.0343	89.7446	77.4318	117.814	99.0601	93.6049	186.794	164.1	140.271	85.2404	72.0279	82.4036	103.493	144.101	73.674	80.0343	99.0601	152.186
ENSMUSG00000012640	15.1905	3.7233	8.15828	6.8322	25.6413	16.0897	2.35629	13.1406	10.1883	33.6842	15.8806	13.1095	15.4049	9.02403	16.1877	8.56174	19.5198	8.15828	16.0897	10.1883	15.6428
ENSMUSG00000012705	0	0.930824	0	0	0	0	0	0	0	0	0	0	1.02699	0.310275	0	0	0.256748	0	0	0	0
ENSMUSG00000012777	9.11431	22.3398	5.7108	6.8322	8.1586	5.02804	4.71257	6.06491	10.8251	6.12439	6.17581	7.86567	11.2969	12.3883	6.67295	7.20085	7.8657	9.11431	6.8322	6.06491	7.02074
ENSMUSG00000012819	0	0	0.815828	0	2.33103	1.00561	0	3.03245	2.54707	0	0	0	0	0.271943	1.11221	1.85984	0	0	1.00561	2.54707	0
ENSMUSG00000012848	1143.09	1427.88	1209.87	1723.67	1196.98	1302.26	1105.1	1029.01	1455.02	1405.55	1222.81	1619.02	1834.21	1260.28	1407.64	1196.38	1520.4	1209.87	1302.26	1105.1	1512.28
ENSMUSG00000012889	3.0381	0	2.44748	1.95206	0	3.01682	0	1.01082	1.27354	4.59329	0.882258	5.24378	1.02699	1.82853	1.65629	0.761451	2.93658	2.44748	1.95206	1.01082	2.81014
ENSMUSG00000013033	66.0788	80.0509	63.6346	100.531	82.7515	74.415	47.1257	45.4868	41.3899	39.8085	37.9371	40.6393	35.9447	69.9214	85.8991	44.6675	38.5824	66.0788	82.7515	45.4868	38.8728
ENSMUSG00000013076	132.917	113.561	109.321	125.908	223.779	181.009	70.6886	100.071	91.0578	549.664	507.298	721.02	614.141	118.6	176.899	87.2725	598.031	113.561	181.009	91.0578	581.903
ENSMUSG00000013083	0	0	0	0	0	0	0	0	0	0	0	0	0	0	0	0	0	0	0	0	0
ENSMUSG00000013089	22.7858	39.0946	29.3698	59.5377	25.6413	37.2075	8.247	23.2488	33.7487	21.4354	12.3516	17.0423	15.4049	30.4167	40.7955	21.7482	16.5585	29.3698	37.2075	23.2488	16.2236
ENSMUSG00000013091	3.0381	0.930824	1.63166	0.976028	3.49654	2.01122	5.89072	9.09736	4.45738	19.9043	27.35	9.17662	18.4859	1.86686	2.16126	6.48182	18.7292	1.63166	2.01122	5.89072	19.1951
ENSMUSG00000013150	110.131	100.529	81.5828	57.5857	54.7792	81.4542	123.705	97.0385	86.6005	90.3348	65.2871	62.9254	99.6182	97.4143	64.6064	102.448	79.5414	100.529	57.5857	97.0385	77.8109
ENSMUSG00000013155	6.07621	3.7233	8.97411	8.78426	3.49654	10.0561	17.6722	5.05409	3.82061	12.2488	9.70484	3.93284	9.24293	6.25787	7.44563	8.84895	8.78235	6.07621	8.78426	5.05409	9.47388
ENSMUSG00000013158	1.51905	0.930824	0.815828	0.976028	0	0	0	2.02164	0.636768	0	0	0	0	1.08857	0.325343	0.886134	0	0.930824	0	0.636768	0
ENSMUSG00000013160	785.35	985.742	905.569	855.977	623.55	613.421	1281.82	857.173	1167.2	963.06	1064.89	1089.4	1030.07	892.22	697.649	1102.06	1036.85	905.569	623.55	1167.2	1047.48
ENSMUSG00000013236	45.5716	70.7426	62.8188	125.908	88.5791	97.544	193.216	182.958	152.188	214.354	169.394	195.331	164.319	59.711	104.01	176.12	185.849	62.8188	97.544	182.958	182.362
ENSMUSG00000013275	66.8383	101.46	82.3986	267.432	124.71	145.813	35.3443	30.3245	32.4752	113.301	80.2855	77.3458	40.0527	83.5656	179.318	32.7147	77.7463	82.3986	145.813	32.4752	78.8156
ENSMUSG00000013338	0	0	0	0	0	0	0	0	0	0	0	1.31095	0	0	0	0	0.327736	0	0	0	0
ENSMUSG00000013353	0	0	0	0	0	0	0	0	0	0	0	0	0	0	0	0	0	0	0	0	0
ENSMUSG00000013367	5.31668	16.7548	11.4216	4.88014	3.49654	2.01122	7.06886	2.02164	0	0	10.5871	6.55473	3.08098	11.1644	3.46263	3.03017	5.0557	11.4216	3.49654	2.02164	4.81785
ENSMUSG00000013415	0	0	0	0	0	0	0	0	0.636768	0	0	0	0	0	0	0.212256	0	0	0	0	0
ENSMUSG00000013418	1.51905	2.79247	0.815828	1.95206	1.16551	2.01122	2.35629	2.02164	1.27354	0	0	0	0	1.70912	1.7096	1.88382	0	1.51905	1.95206	2.02164	0
ENSMUSG00000013419	7.59526	13.0315	11.4216	20.4966	22.1448	15.0841	0	8.08654	9.55152	4.59329	10.5871	2.62189	11.2969	10.6828	19.2418	5.87935	7.2748	11.4216	20.4966	8.08654	7.59019
ENSMUSG00000013465	275.708	289.486	288.803	408.956	321.682	338.89	378.184	316.386	413.899	199.043	222.329	276.609	265.991	284.666	356.509	369.49	240.993	288.803	338.89	378.184	244.16
ENSMUSG00000013483	0.759526	0.930824	2.44748	9.76028	10.4896	13.0729	27.0973	35.3786	24.1972	3.0622	0	2.62189	1.02699	1.37928	11.1076	28.891	1.67777	0.930824	10.4896	27.0973	1.82444
ENSMUSG00000013495	64.5597	79.12	79.1353	101.507	83.917	80.4486	136.665	124.331	146.457	79.6171	68.8161	56.3706	66.7545	74.2717	88.6242	135.817	67.8896	79.12	83.917	136.665	67.7853
ENSMUSG00000013523	0.759526	0	0	0	2.33103	0	0	0	0	0	0	0	0	0.253175	0.77701	0	0	0	0	0	0
ENSMUSG00000013562	0	0	0	0	1.16551	5.02804	0	0	0	0	0	0	0	0	2.06452	0	0	0	1.16551	0	0
ENSMUSG00000013584	2.27858	0	4.07914	5.85617	9.32411	0	0	1.01082	3.18384	6.12439	5.29355	3.93284	1.02699	2.11924	5.0601	1.39822	4.09444	2.27858	5.85617	1.01082	4.61319
ENSMUSG00000013593	1743.11	1748.09	1619.42	2467.4	1963.89	2052.45	1943.94	1845.75	1778.49	3970.14	4741.25	3283.92	3179.57	1703.54	2161.25	1856.06	3793.72	1743.11	2052.45	1845.75	3627.03
ENSMUSG00000013611	0	0	0	0.976028	0	0	0	0	0	0	0	0	0	0	0.325343	0	0	0	0	0	0
ENSMUSG00000013622	672.94	773.515	606.16	560.24	416.089	470.625	591.428	508.441	480.76	454.736	416.426	457.52	508.361	684.205	482.318	526.876	459.261	672.94	470.625	508.441	456.128
ENSMUSG00000013629	114.688	132.177	104.426	193.254	184.151	197.099	123.705	146.569	141.363	185.263	162.335	133.716	106.807	117.097	191.501	137.212	147.03	114.688	193.254	141.363	148.026
ENSMUSG00000013643	0	0	0	0	1.16551	0	4.71257	24.2596	25.4707	0	0	0	0	0	0.388505	18.1476	0	0	0	24.2596	0
ENSMUSG00000013646	208.87	195.473	183.561	256.695	159.675	175.981	282.754	235.521	261.075	188.325	313.202	259.567	239.289	195.968	197.451	259.783	250.096	195.473	175.981	261.075	249.428
ENSMUSG00000013653	0	0	0	0	0	0	0	0	0	0	1.76452	0	6.16195	0	0	0	1.98162	0	0	0	0.882258
ENSMUSG00000013662	605.342	610.62	687.743	406.028	466.206	449.507	525.452	397.251	543.8	278.66	215.271	335.602	358.42	634.569	440.58	488.834	296.988	610.62	449.507	525.452	307.131
ENSMUSG00000013663	1276.76	1022.98	1393.43	939.915	1812.37	1541.6	986.106	954.212	1223.23	917.128	920.195	1178.54	1190.28	1231.06	1431.3	1054.52	1051.54	1276.76	1541.6	986.106	1049.37
ENSMUSG00000013668	0	0	0	0	0	0	0	0	0	0	0	0	0	0	0	0	0	0	0	0	0
ENSMUSG00000013698	233.174	246.668	239.853	217.654	205.131	193.077	294.536	359.851	352.77	226.602	250.561	214.995	192.048	239.899	205.287	335.719	221.052	239.853	205.131	352.77	220.799
ENSMUSG00000013701	53.9263	51.1953	22.8432	132.74	136.365	162.908	0	0	0	65.8372	60.8758	110.119	123.239	42.6549	144.005	0	90.0179	51.1953	136.365	0	87.9783
ENSMUSG00000013707	9.11431	8.37741	9.78994	8.78426	4.66206	9.05047	12.9596	21.2272	12.7354	19.9043	5.29355	13.1095	21.5668	9.09389	7.49893	15.6407	14.9685	9.11431	8.78426	12.9596	16.5069
ENSMUSG00000013736	140.512	131.246	149.297	95.6508	114.22	95.5328	86.0045	94.006	84.6902	58.1817	47.6419	62.9254	82.1594	140.352	101.801	88.2336	62.7271	140.512	95.6508	86.0045	60.5535
ENSMUSG00000013766	1.51905	0	0	0	2.33103	0	0	0	1.27354	0	0	0	0	0.506351	0.77701	0.424512	0	0	0	0	0
ENSMUSG00000013787	588.633	689.74	468.285	1093.15	609.564	650.628	944.871	727.789	783.861	970.716	1101.94	879.644	764.082	582.219	784.448	818.84	929.096	588.633	650.628	783.861	925.18
ENSMUSG00000013822	281.025	338.82	284.724	233.271	184.151	161.903	334.593	553.928	348.312	759.424	702.277	579.438	530.955	301.523	193.108	412.278	643.024	284.724	184.151	348.312	640.857
ENSMUSG00000013833	185.324	188.026	153.376	443.117	242.427	205.144	508.958	294.148	258.528	1197.32	1221.04	1030.4	922.239	175.575	296.896	353.878	1092.75	185.324	242.427	294.148	1113.86
ENSMUSG00000013846	1266.13	1341.32	1365.7	1041.42	1206.31	1317.35	1566.93	1974.13	2013.46	898.754	953.721	766.903	1116.34	1324.38	1188.36	1851.51	933.93	1341.32	1206.31	1974.13	926.238
ENSMUSG00000013858	941.812	1000.64	750.562	1350.82	708.633	824.599	1774.28	862.227	632.947	1497.41	1685.11	1189.03	1008.51	897.67	961.352	1089.82	1345.01	941.812	824.599	862.227	1343.22
ENSMUSG00000013878	162.539	135.9	177.035	60.5138	60.6067	74.415	90.7171	42.4543	101.246	29.0909	29.9968	51.1269	54.4306	158.491	65.1785	78.1392	41.1613	162.539	60.6067	90.7171	40.5618
ENSMUSG00000013921	5.31668	11.1699	4.07914	14.6404	4.66206	7.03926	4.71257	10.1082	3.82061	15.311	16.7629	3.93284	6.16195	6.85524	8.78058	6.21379	10.5422	5.31668	7.03926	4.71257	10.7365
ENSMUSG00000013928	0	0	0	0	0	0	0	0	0.636768	1.5311	0	0	1.02699	0	0	0.212256	0.639522	0	0	0	0.513496
ENSMUSG00000013936	0	0	0	0	0	0	0	0	0	0	0	1.31095	0	0	0	0	0.327736	0	0	0	0
ENSMUSG00000013973	353.939	441.211	374.465	348.442	301.868	354.98	366.403	340.646	411.352	258.756	286.734	293.652	282.423	389.872	335.097	372.8	280.391	374.465	348.442	366.403	284.578
ENSMUSG00000013974	0.759526	1.86165	1.63166	0	0	1.00561	0	0	0	4.59329	0.882258	0	1.02699	1.41761	0.335203	0	1.62564	1.63166	0	0	0.954625
ENSMUSG00000013997	564.328	600.381	616.766	394.315	319.351	390.176	446.516	795.513	417.72	404.21	636.99	448.343	443.661	593.825	367.947	553.25	483.301	600.381	390.176	446.516	446.002
ENSMUSG00000014030	1.51905	3.7233	0.815828	0	0	2.01122	0	0	0	1.5311	0.882258	0	0	2.01939	0.670405	0	0.603339	1.51905	0	0	0.441129
ENSMUSG00000014039	69.1169	46.5412	57.108	49.7774	102.565	95.5328	29.4536	64.6923	42.6635	39.8085	48.5242	35.3955	58.5386	57.5887	82.6252	45.6031	45.5667	57.108	95.5328	42.6635	44.1664
ENSMUSG00000014074	150.386	143.347	161.534	119.075	165.503	157.88	102.498	116.244	147.093	102.584	104.106	141.582	109.888	151.756	147.486	121.945	114.54	150.386	157.88	116.244	106.997
ENSMUSG00000014075	8.35479	3.7233	8.97411	3.90411	8.1586	8.04486	7.06886	28.3029	15.2824	62.775	49.4064	48.505	34.9177	7.0174	6.70253	16.8847	48.901	8.35479	8.04486	15.2824	48.9557
ENSMUSG00000014077	3381.41	3129.43	3007.14	1681.7	1685.33	1699.48	1385.5	1423.23	1515.51	1330.52	1183.99	1573.13	1651.4	3172.66	1688.84	1441.41	1434.76	3129.43	1685.33	1423.23	1451.83
ENSMUSG00000014104	0	0	0	0	0	0	0	0	0	0	0	0	0	0	0	0	0	0	0	0	0
ENSMUSG00000014158	3.0381	1.86165	5.7108	6.8322	6.99309	7.03926	61.2635	40.4327	46.4841	4.59329	7.05806	6.55473	5.13496	3.53685	6.95485	49.3934	5.83526	3.0381	6.99309	46.4841	5.84484
ENSMUSG00000014164	50.1287	17.6857	21.2115	46.8494	60.6067	46.258	11.7814	27.2921	17.1927	18.3732	35.2903	34.0846	57.5116	29.6753	51.238	18.7554	36.3149	21.2115	46.8494	17.1927	34.6874
ENSMUSG00000014177	18.9881	6.51577	8.97411	33.185	31.4689	47.2636	23.5629	34.3678	41.3899	9.18659	20.2919	32.7736	44.1607	11.4927	37.3058	33.1069	26.6032	8.97411	33.185	34.3678	26.5328
ENSMUSG00000014195	425.335	448.657	392.413	280.12	299.537	372.075	281.576	251.694	373.783	234.258	232.034	256.945	224.911	422.135	317.244	302.351	237.037	425.335	299.537	281.576	233.146
ENSMUSG00000014198	0	0	0	0	0	0	0	0	0	0	0	0	0	0	0	0	0	0	0	0	0
ENSMUSG00000014226	302.291	310.895	336.937	103.459	268.068	246.374	258.013	246.64	229.237	177.607	201.155	187.465	198.209	316.708	205.967	244.63	191.109	310.895	246.374	246.64	192.837
ENSMUSG00000014232	46.3311	54.9186	74.2404	38.0651	26.8068	55.3084	399.391	326.494	527.244	29.0909	30.879	39.3284	30.8098	58.4967	40.0601	417.71	32.527	54.9186	38.0651	399.391	30.8444
ENSMUSG00000014243	88.105	101.46	81.5828	68.322	57.1102	74.415	136.665	109.168	142.636	22.9665	14.9984	34.0846	25.6748	90.3825	66.6157	129.49	24.4311	88.105	68.322	136.665	24.3206
ENSMUSG00000014245	52.4073	78.1892	48.9497	64.4179	55.9447	75.4206	29.4536	38.4111	35.0222	670.621	548.764	249.08	241.343	59.8487	65.2611	34.2956	427.452	52.4073	64.4179	35.0222	398.922
ENSMUSG00000014294	862.062	1402.75	684.48	491.918	395.109	385.148	527.808	1462.65	619.575	1616.84	1279.27	1166.74	1185.15	983.098	424.059	870.012	1312	862.062	395.109	619.575	1232.21
ENSMUSG00000014301	5.31668	19.5473	6.52662	4.88014	3.49654	3.01682	0	12.1298	1.9103	36.7463	23.821	18.3532	23.6208	10.4635	3.79784	4.68004	25.6353	6.52662	3.49654	1.9103	23.7209
ENSMUSG00000014303	15.95	37.233	22.8432	27.3288	20.9793	23.129	37.7006	23.2488	33.1119	45.9329	65.2871	23.597	27.7288	25.3421	23.8123	31.3538	40.6365	22.8432	23.129	33.1119	36.8309
ENSMUSG00000014313	217.984	480.305	210.484	47.8254	99.0687	83.4655	20.0284	51.5517	32.4752	10.7177	2.64677	3.93284	2.05398	302.924	76.7865	34.6851	4.83782	217.984	83.4655	32.4752	3.2898
ENSMUSG00000014329	35.6977	43.7487	23.659	163.973	194.641	209.166	23.5629	40.4327	19.7398	76.5549	44.1129	35.3955	44.1607	34.3685	189.26	27.9118	50.056	35.6977	194.641	23.5629	44.1368
ENSMUSG00000014349	539.263	602.243	617.582	592.449	536.137	554.09	796.425	694.432	765.395	857.415	908.726	774.768	758.947	586.363	560.892	752.084	824.964	602.243	554.09	765.395	816.092
ENSMUSG00000014351	0	0	0	0	0	0	4.71257	4.04327	6.36768	0	0	0	0	0	0	5.04118	0	0	0	4.71257	0
ENSMUSG00000014353	239.251	201.058	243.933	336.73	299.537	335.873	143.734	108.157	125.443	137.799	179.981	161.246	225.938	228.08	324.047	125.778	176.241	239.251	335.873	125.443	170.613
ENSMUSG00000014355	328.115	327.65	327.147	304.521	470.868	435.428	360.512	382.089	378.24	159.234	217.035	246.458	254.694	327.637	403.606	373.614	219.355	327.65	435.428	378.24	231.747
ENSMUSG00000014361	154.943	121.007	130.532	236.199	275.061	317.772	47.1257	61.6599	89.1475	346.028	430.542	445.721	321.449	135.494	276.344	65.9777	385.935	130.532	275.061	61.6599	388.285
ENSMUSG00000014402	214.946	233.637	207.22	218.63	221.448	215.2	299.248	322.451	313.29	575.693	619.345	376.241	401.554	218.601	218.426	311.663	493.208	214.946	218.63	313.29	488.623
ENSMUSG00000014418	161.779	149.863	168.876	169.829	206.296	205.144	161.406	193.066	222.869	113.301	166.747	183.532	212.587	160.173	193.756	192.447	169.042	161.779	205.144	193.066	175.14
ENSMUSG00000014426	70.6359	95.8749	62.8188	77.1062	76.9239	76.4262	62.4416	57.6166	52.215	114.832	82.05	87.8333	79.0784	76.4432	76.8188	57.4244	90.9485	70.6359	76.9239	57.6166	84.9417
ENSMUSG00000014444	41.0144	18.6165	28.554	79.0583	95.5722	70.3926	21.2066	68.7356	42.0267	65.8372	69.6984	77.3458	44.1607	29.395	81.6743	43.9896	64.2605	28.554	79.0583	42.0267	67.7678
ENSMUSG00000014453	6.07621	3.7233	1.63166	5.85617	5.82757	8.04486	0	0	2.54707	1.5311	1.76452	0	2.05398	3.81039	6.5762	0.849024	1.3374	3.7233	5.85617	0	1.64781
ENSMUSG00000014470	101.776	129.385	105.242	99.5549	54.7792	50.2804	93.0733	76.8221	52.8517	225.071	239.092	196.642	194.102	112.134	68.2048	74.2491	213.727	105.242	54.7792	76.8221	210.857
ENSMUSG00000014496	230.896	163.825	212.931	256.695	461.544	386.153	120.171	201.153	181.479	110.239	93.5193	156.002	202.317	202.551	368.131	167.601	140.52	212.931	386.153	181.479	133.121
ENSMUSG00000014498	16.7096	26.0631	26.1065	51.7295	45.4551	58.3253	4.71257	34.3678	10.1883	22.9665	21.1742	26.2189	14.3779	22.9597	51.8366	16.4229	21.1844	26.0631	51.7295	10.1883	22.0703
ENSMUSG00000014503	4.55716	4.65412	8.97411	2.92809	13.9862	8.04486	10.6033	1.01082	5.73091	0	0.882258	6.55473	1.02699	6.06179	8.31971	5.78167	2.11599	4.65412	8.04486	5.73091	0.954625
ENSMUSG00000014504	99.4979	106.114	112.584	130.788	108.393	138.774	74.223	81.8762	137.542	146.985	114.694	140.271	184.859	106.065	125.985	97.8804	146.702	106.114	130.788	81.8762	143.628
ENSMUSG00000014529	0	0	0	0	0	0	0	0	0	0	0	0	0	0	0	0	0	0	0	0	0
ENSMUSG00000014542	619.773	334.166	518.051	469.47	440.564	326.823	397.034	555.95	732.92	757.893	442.011	794.433	774.352	490.663	412.286	561.968	692.172	518.051	440.564	555.95	766.123
ENSMUSG00000014543	0	0	0	0	0	0	0	3.03245	3.18384	1.5311	0	0	0	0	0	2.0721	0.382774	0	0	3.03245	0
ENSMUSG00000014547	21.2667	10.2391	13.0532	18.5445	82.7515	64.3589	0	25.2704	10.8251	13.7799	11.4694	30.1517	47.2416	14.853	55.2183	12.0318	25.6607	13.0532	64.3589	10.8251	21.9658
ENSMUSG00000014550	107.093	95.8749	113.4	103.459	128.207	129.723	108.389	99.0601	135.632	87.2726	100.577	116.674	153.022	105.456	120.463	114.36	114.386	107.093	128.207	108.389	108.626
ENSMUSG00000014551	143.55	160.102	137.059	99.5549	90.9101	92.5159	116.636	200.142	197.398	111.77	132.339	132.405	143.779	146.904	94.327	171.392	130.073	143.55	92.5159	197.398	132.372
ENSMUSG00000014554	101.776	143.347	99.531	80.0343	72.2619	99.5552	159.049	159.709	181.479	154.641	211.742	138.96	139.671	114.885	83.9505	166.746	161.253	101.776	80.0343	159.709	147.156
ENSMUSG00000014592	8.35479	7.44659	8.15828	5.85617	6.99309	4.02243	29.4536	19.2055	12.7354	12.2488	9.70484	10.4876	5.13496	7.98655	5.6239	20.4648	9.39403	8.15828	5.85617	19.2055	10.0962
ENSMUSG00000014599	94.1812	96.8057	117.479	123.956	92.0756	66.3701	155.515	98.0493	69.4077	146.985	149.102	124.54	108.861	102.822	94.1338	107.657	132.372	96.8057	92.0756	98.0493	135.763
ENSMUSG00000014601	179.248	174.995	158.271	210.822	241.261	235.312	262.726	229.456	243.245	205.167	164.1	165.179	189.994	170.838	229.132	245.142	181.11	174.995	235.312	243.245	177.586
ENSMUSG00000014602	0.759526	3.7233	0.815828	5.85617	3.49654	3.01682	32.988	21.2272	42.0267	0	0.882258	1.31095	1.02699	1.76622	4.12318	32.0806	0.805049	0.815828	3.49654	32.988	0.954625
ENSMUSG00000014603	0	0	0	0	0	0	2.35629	0	0	0	0	0	0	0	0	0.785429	0	0	0	0	0
ENSMUSG00000014606	704.081	780.03	720.376	1130.24	665.509	816.554	825.879	604.469	711.907	1221.82	1195.46	1046.13	954.076	734.829	870.768	714.085	1104.37	720.376	816.554	711.907	1120.8
ENSMUSG00000014609	3.79763	10.2391	2.44748	0.976028	2.33103	2.01122	0	0	1.9103	108.708	142.926	107.497	91.4023	5.49473	1.77276	0.636768	112.633	3.79763	2.01122	0	108.103
ENSMUSG00000014633	65.3192	112.63	90.5569	78.0823	72.2619	69.3869	98.9641	171.839	133.085	96.4592	107.635	95.699	85.2404	89.5019	73.2437	134.629	96.2585	90.5569	72.2619	133.085	96.0791
ENSMUSG00000014668	164.058	205.712	190.904	185.445	175.993	193.077	187.325	144.547	166.833	128.612	138.514	163.868	163.292	186.891	184.838	166.235	148.572	190.904	185.445	166.833	150.903
ENSMUSG00000014686	0	0	0	1.95206	0	0	0	1.01082	0.636768	1.5311	0.882258	1.31095	3.08098	0	0.650686	0.549195	1.70132	0	0	0.636768	1.42102
ENSMUSG00000014704	2.27858	0.930824	3.26331	5.85617	2.33103	1.00561	0	3.03245	2.54707	6.12439	8.82258	1.31095	3.08098	2.15757	3.06427	1.85984	4.83472	2.27858	2.33103	2.54707	4.60268
ENSMUSG00000014725	0	0	0	0	0	0	0	0	0	3.0622	0	0	0	0	0	0	0.765549	0	0	0	0
ENSMUSG00000014747	0	1.86165	0	1.95206	0	0	0	0	0	0	0	0	0	0.620549	0.650686	0	0	0	0	0	0
ENSMUSG00000014748	827.883	928.962	919.438	842.312	627.047	615.432	1523.34	1315.07	1465.2	993.682	950.192	970.099	894.51	892.095	694.93	1434.54	952.121	919.438	627.047	1465.2	960.146
ENSMUSG00000014763	224.06	201.058	259.433	167.877	196.972	160.897	235.629	241.585	248.976	225.071	305.261	260.878	214.641	228.184	175.249	242.063	251.463	224.06	167.877	241.585	242.975
ENSMUSG00000014767	173.931	152.655	155.823	189.35	207.462	206.15	155.515	140.504	142.636	182.201	97.9306	106.187	146.86	160.803	200.987	146.218	133.294	155.823	206.15	142.636	126.523
ENSMUSG00000014769	816.49	1198.9	856.619	630.514	608.398	566.157	564.331	817.751	653.961	1258.56	1272.22	1257.2	1139.96	957.337	601.69	678.681	1231.98	856.619	608.398	653.961	1257.88
ENSMUSG00000014771	0	0	0	0	0	0	0	0	0	0	0	0	0	0	0	0	0	0	0	0	0
ENSMUSG00000014773	34.1787	26.9939	34.2648	47.8254	34.9654	40.2243	56.5509	38.4111	29.2913	45.9329	51.171	34.0846	41.0797	31.8124	41.005	41.4178	43.067	34.1787	40.2243	38.4111	43.5063
ENSMUSG00000014776	5.31668	10.2391	0.815828	1.95206	1.16551	1.00561	27.0973	18.1947	10.8251	3.0622	6.17581	2.62189	0	5.45719	1.37439	18.7057	2.96497	5.31668	1.16551	18.1947	2.84204
ENSMUSG00000014778	88.8645	80.9817	89.7411	84.9145	66.4343	70.3926	64.7979	50.5409	32.4752	48.9951	29.1145	23.597	23.6208	86.5291	73.9138	49.2713	31.3319	88.8645	70.3926	50.5409	26.3677
ENSMUSG00000014782	0	0	0.815828	1.95206	0	1.00561	0	0	0	0	0	0	0	0.271943	0.985888	0	0	0	1.00561	0	0
ENSMUSG00000014786	0.759526	1.86165	5.7108	1.95206	6.99309	2.01122	1.17814	6.06491	5.09414	0	0	2.62189	2.05398	2.77732	3.65212	4.1124	1.16897	1.86165	2.01122	5.09414	1.02699
ENSMUSG00000014791	253.682	273.662	253.723	254.743	184.151	208.161	327.524	301.224	270.626	312.344	369.666	314.627	240.316	260.355	215.685	299.791	309.238	253.723	208.161	301.224	313.485
ENSMUSG00000014813	0	0	0.815828	0	1.16551	1.00561	0	4.04327	0	1.5311	3.52903	0	4.10797	0.271943	0.723707	1.34776	2.29202	0	1.00561	0	2.53006
ENSMUSG00000014837	6.83573	8.37741	6.52662	5.85617	5.82757	7.03926	5.89072	14.1514	5.73091	9.18659	4.41129	9.17662	14.3779	7.24659	6.241	8.59103	9.2881	6.83573	5.85617	5.89072	9.1816
ENSMUSG00000014846	0.759526	1.86165	0.815828	6.8322	5.82757	9.05047	0	9.09736	3.18384	1.5311	24.7032	2.62189	6.16195	1.14567	7.23675	4.09373	8.75454	0.815828	6.8322	3.18384	4.39192
ENSMUSG00000014850	111.65	129.385	152.56	87.8426	127.041	117.656	71.8668	75.8113	105.067	67.3683	60.8758	89.1443	82.1594	131.198	110.847	84.2483	74.8869	129.385	117.656	75.8113	74.7638
ENSMUSG00000014852	41.0144	28.8555	29.3698	350.394	181.82	272.52	101.32	131.406	94.8784	113.301	103.224	98.3209	90.3753	33.0799	268.245	109.202	101.305	29.3698	272.52	101.32	100.773
ENSMUSG00000014856	104.055	124.73	113.4	101.507	101.4	97.544	88.3608	163.752	91.0578	136.268	155.277	171.734	207.452	114.062	100.15	114.39	167.683	113.4	101.4	91.0578	163.506
ENSMUSG00000014859	204.312	252.253	222.721	333.802	208.627	199.11	289.823	251.694	236.241	465.454	385.547	263.5	237.235	226.429	247.18	259.253	337.934	222.721	208.627	251.694	324.523
ENSMUSG00000014867	3433.06	3662.79	3738.12	3952.91	3508.2	3546.78	5209.75	4595.18	5778.67	4562.67	5310.31	5172.99	4821.73	3611.32	3669.3	5194.53	4966.92	3662.79	3546.78	5209.75	4997.36
ENSMUSG00000014873	87.3455	95.8749	101.979	104.435	72.2619	88.4935	97.7859	140.504	154.098	71.9616	75.8742	66.8582	71.8895	95.0663	88.3968	130.796	71.6459	95.8749	88.4935	140.504	71.9255
ENSMUSG00000014905	469.387	507.299	515.603	378.699	407.93	412.299	642.088	516.528	732.92	243.445	165.864	329.047	310.152	497.43	399.643	630.512	262.127	507.299	407.93	642.088	276.798
ENSMUSG00000014907	51.6478	50.2645	42.4231	25.3767	24.4758	27.1514	30.6317	22.238	24.1972	116.363	85.579	57.6816	47.2416	48.1118	25.668	25.689	76.7164	50.2645	25.3767	24.1972	71.6303
ENSMUSG00000014932	262.796	222.467	244.748	126.884	245.924	216.206	190.859	167.796	171.291	71.9616	64.4048	106.187	122.212	243.337	196.338	176.649	91.1913	244.748	216.206	171.291	89.0741
ENSMUSG00000014956	502.047	305.31	463.39	293.785	463.875	451.518	432.379	392.197	385.881	370.526	340.552	326.425	364.582	423.582	403.059	403.486	350.521	463.39	451.518	392.197	352.567
ENSMUSG00000014959	365.332	286.694	380.992	489.966	381.123	346.935	512.492	385.122	473.119	907.941	951.956	464.075	441.607	344.339	406.008	456.911	691.395	365.332	381.123	473.119	686.008
ENSMUSG00000014980	44.812	48.4028	44.8705	115.171	99.0687	128.718	34.1662	47.5084	42.6635	27.5598	39.7016	36.7065	60.5925	46.0285	114.319	41.446	41.1401	44.8705	115.171	42.6635	38.204
ENSMUSG00000015001	0	0	0	0	0	1.00561	0	1.01082	0	0	0	0	0	0	0.335203	0.336939	0	0	0	0	0
ENSMUSG00000015002	547.618	466.343	509.077	388.459	522.15	521.911	291.001	366.927	422.177	257.224	264.677	380.174	415.932	507.679	477.507	360.035	329.502	509.077	521.911	366.927	322.426
ENSMUSG00000015013	76.7121	125.661	68.5296	132.74	96.7377	89.4991	101.32	98.0493	149.004	131.674	119.987	102.254	97.5643	90.301	106.326	116.124	112.87	76.7121	96.7377	101.32	111.12
ENSMUSG00000015016	320.52	349.059	282.277	393.339	275.061	237.323	465.367	402.305	376.33	356.746	373.195	367.065	360.474	317.285	301.908	414.667	364.37	320.52	275.061	402.305	363.769
ENSMUSG00000015023	211.148	187.096	239.038	182.517	158.51	158.886	120.171	189.023	175.748	228.134	162.335	157.313	168.427	212.427	166.638	161.647	179.052	211.148	158.886	175.748	165.381
ENSMUSG00000015027	69.1169	83.7741	59.5554	100.531	65.2688	68.3813	208.531	129.385	141.363	39.8085	40.5839	43.2612	45.1877	70.8155	78.0604	159.76	42.2103	69.1169	68.3813	141.363	41.9225
ENSMUSG00000015053	9.87384	9.30824	13.8691	13.6644	6.99309	6.03365	31.8099	17.1839	12.0986	6.12439	18.5274	7.86567	9.24293	11.0171	8.89704	20.3641	10.4401	9.87384	6.99309	17.1839	8.5543
ENSMUSG00000015083	2331.74	3226.24	2551.91	2280	1949.91	1905.63	1781.35	1413.12	1896.93	1690.33	1454.84	1839.26	1648.32	2703.3	2045.18	1697.14	1658.19	2551.91	1949.91	1781.35	1669.33
ENSMUSG00000015085	35.6977	52.1261	48.9497	34.161	17.4827	24.1346	67.1542	43.4652	38.2061	148.516	150.866	125.851	124.266	45.5912	25.2594	49.6085	137.375	48.9497	24.1346	43.4652	137.184
ENSMUSG00000015087	176.97	196.404	173.771	302.569	179.489	225.256	247.41	183.969	217.138	304.688	241.739	241.214	141.725	182.382	235.771	216.172	232.341	176.97	225.256	217.138	241.476
ENSMUSG00000015090	15.95	51.1953	26.9223	51.7295	36.1309	38.2131	10.6033	4.04327	10.1883	0	0	2.62189	1.02699	31.3559	42.0245	8.27828	0.912221	26.9223	38.2131	10.1883	0.513496
ENSMUSG00000015092	480.78	685.086	379.36	525.103	353.151	296.654	719.846	482.16	317.11	632.343	458.774	393.284	359.447	515.075	391.636	506.372	460.962	480.78	353.151	482.16	426.029
ENSMUSG00000015093	12.1524	15.824	28.554	1.95206	12.8207	9.05047	70.6886	134.439	119.076	13.7799	28.2323	32.7736	21.5668	18.8435	7.94106	108.068	24.0881	15.824	9.05047	119.076	24.8995
ENSMUSG00000015094	15.1905	9.30824	15.5007	10.7363	5.82757	4.02243	133.13	42.4543	42.6635	27.5598	20.2919	27.5298	34.9177	13.3332	6.86211	72.7493	27.5748	15.1905	5.82757	42.6635	27.5448
ENSMUSG00000015095	406.346	450.519	473.996	820.84	476.695	538	1040.3	858.184	823.341	1518.85	1360.44	798.366	816.459	443.62	611.845	907.275	1123.53	450.519	538	858.184	1088.45
ENSMUSG00000015112	2209.46	1852.34	2157.87	2654.8	2299.56	2608.55	2503.55	1558.68	1886.74	1799.04	2067.13	2570.76	2242.95	2073.22	2520.97	1982.99	2169.97	2157.87	2608.55	1886.74	2155.04
ENSMUSG00000015120	43.293	34.4405	45.6864	33.185	40.793	36.2019	69.5105	66.714	88.5108	22.9665	24.7032	15.7313	34.9177	41.1399	36.7266	74.9117	24.5797	43.293	36.2019	69.5105	23.8348
ENSMUSG00000015126	72.9145	88.4283	70.1612	90.7706	54.7792	47.2636	162.584	114.222	108.887	93.397	119.105	106.187	91.4023	77.168	64.2711	128.565	102.523	72.9145	54.7792	114.222	99.7918
ENSMUSG00000015127	25.0644	31.648	40.7914	50.7535	61.7723	59.3309	11.7814	61.6599	22.9237	177.607	136.75	108.808	72.9164	32.5013	57.2855	32.1217	124.021	31.648	59.3309	22.9237	122.779
ENSMUSG00000015133	218.743	165.687	197.43	317.209	319.351	369.058	302.783	252.704	213.317	225.071	232.034	241.214	241.343	193.954	335.206	256.268	234.916	197.43	319.351	252.704	236.624
ENSMUSG00000015134	0.759526	11.1699	1.63166	3.90411	4.66206	0	25.9192	26.2813	5.09414	24.4976	20.2919	19.6642	11.2969	4.52036	2.85539	19.0982	18.9376	1.63166	3.90411	25.9192	19.9781
ENSMUSG00000015143	186.084	241.083	243.117	426.524	310.027	302.688	135.487	151.623	117.802	476.171	506.416	443.099	348.15	223.428	346.413	134.97	443.459	241.083	310.027	135.487	459.635
ENSMUSG00000015149	367.611	453.311	320.62	299.641	208.627	243.357	298.07	268.877	222.869	586.41	609.64	373.619	323.503	380.514	250.542	263.272	473.293	367.611	243.357	268.877	480.015
ENSMUSG00000015165	1076.25	1130.95	759.536	983.837	695.812	737.111	1010.85	645.912	849.449	724.209	641.402	665.96	588.467	988.912	805.586	835.403	655.009	1076.25	737.111	849.449	653.681
ENSMUSG00000015176	229.377	286.694	281.461	339.658	315.854	336.879	305.139	298.191	401.164	258.756	171.158	166.49	161.238	265.844	330.797	334.831	189.41	281.461	336.879	305.139	168.824
ENSMUSG00000015189	331.913	253.184	314.91	294.761	363.64	356.991	200.284	116.244	203.129	107.177	97.9306	121.918	139.671	300.002	338.464	173.219	116.674	314.91	356.991	200.284	114.547
ENSMUSG00000015202	80.5098	91.2207	119.111	78.0823	75.7584	74.415	94.2515	103.103	130.537	116.363	84.6968	65.5473	99.6182	96.9471	76.0852	109.297	91.5564	91.2207	75.7584	103.103	92.1575
ENSMUSG00000015214	372.168	265.285	323.068	355.274	398.606	408.277	286.289	300.213	292.913	124.019	118.223	208.44	173.562	320.173	387.386	293.138	156.061	323.068	398.606	292.913	148.79
ENSMUSG00000015217	41.7739	46.5412	39.1597	68.322	38.462	29.1626	32.988	44.476	42.0267	26.0287	40.5839	49.8159	36.9717	42.4916	45.3155	39.8302	38.35	41.7739	38.462	42.0267	38.7778
ENSMUSG00000015222	8.35479	12.1007	12.2374	9.76028	27.9723	32.1795	7.06886	2.02164	8.91475	6.12439	0.882258	3.93284	2.05398	10.8976	23.304	6.00175	3.24837	12.1007	27.9723	7.06886	2.99341
ENSMUSG00000015224	138.234	113.561	115.848	95.6508	116.551	84.4711	23.5629	28.3029	43.937	1.5311	2.64677	1.31095	2.05398	122.547	98.8911	31.9343	1.8857	115.848	95.6508	28.3029	1.79254
ENSMUSG00000015242	0	0	0	0	0	0	0	0	0	0	0	0	0	0	0	0	0	0	0	0	0
ENSMUSG00000015243	1791.72	1405.54	1586.79	1702.19	2765.77	2647.77	1107.45	1131.1	1386.24	878.85	891.963	1582.31	1446	1594.68	2371.91	1208.27	1199.78	1586.79	2647.77	1131.1	1168.98
ENSMUSG00000015247	859.024	847.05	908.832	572.929	652.688	667.724	557.262	395.23	415.81	272.535	421.719	432.612	355.339	871.635	631.113	456.1	370.551	859.024	652.688	415.81	388.529
ENSMUSG00000015289	129.119	231.775	124.822	125.908	97.9032	83.4655	82.47	215.304	69.4077	82.6793	100.577	98.3209	73.9434	161.905	102.425	122.394	88.8802	129.119	97.9032	82.47	90.5001
ENSMUSG00000015290	130.638	166.617	147.665	182.517	158.51	178.998	274.507	205.196	222.232	169.952	151.748	209.751	183.832	148.307	173.342	233.978	178.821	147.665	178.998	222.232	176.892
ENSMUSG00000015291	764.843	927.101	890.884	907.706	827.515	980.468	895.389	771.254	1020.74	878.85	924.606	829.828	746.623	860.942	905.23	895.794	844.977	890.884	907.706	895.389	854.339
ENSMUSG00000015305	483.818	328.581	332.042	341.61	410.261	422.355	372.293	480.138	444.464	384.306	404.956	440.478	391.284	381.48	391.409	432.299	405.256	332.042	410.261	444.464	398.12
ENSMUSG00000015312	3.79763	3.7233	5.7108	0.976028	1.16551	3.01682	8.247	8.08654	5.09414	3.0622	7.05806	5.24378	4.10797	4.41057	1.71946	7.14256	4.868	3.79763	1.16551	8.08654	4.67587
ENSMUSG00000015314	1.51905	0	1.63166	3.90411	1.16551	3.01682	8.247	0	3.82061	0	2.64677	0	2.05398	1.05024	2.69548	4.02254	1.17519	1.51905	3.01682	3.82061	1.02699
ENSMUSG00000015316	1.51905	0	0	0	0	0	0	1.01082	0	3.0622	0	1.31095	1.02699	0.506351	0	0.336939	1.35003	0	0	0	1.16897
ENSMUSG00000015335	157.222	165.687	155.823	158.117	83.917	103.578	164.94	174.871	105.067	368.995	544.353	340.846	222.857	159.577	115.204	148.293	369.263	157.222	103.578	164.94	354.92
ENSMUSG00000015337	163.298	123.8	88.9253	176.661	79.255	63.3533	354.621	172.85	117.165	99.5214	93.5193	117.985	91.4023	125.341	106.423	214.879	100.607	123.8	79.255	172.85	96.5203
ENSMUSG00000015340	81.2693	38.1638	79.9511	76.1302	58.2757	63.3533	37.7006	84.9087	91.6946	39.8085	38.8193	72.102	66.7545	66.4614	65.9197	71.4346	54.3711	79.9511	63.3533	84.9087	53.2815
ENSMUSG00000015341	558.252	508.23	671.426	599.281	487.185	610.404	303.961	189.023	247.066	365.932	420.837	356.577	400.527	579.303	565.623	246.683	385.968	558.252	599.281	247.066	383.23
ENSMUSG00000015342	74.4335	57.7111	77.5037	47.8254	97.9032	78.4374	53.0165	77.833	96.152	52.0573	37.0548	69.4801	69.8355	69.8828	74.722	75.6671	57.1069	74.4335	78.4374	77.833	60.7687
ENSMUSG00000015354	8.35479	6.51577	10.6058	5.85617	5.82757	4.02243	0	3.03245	3.82061	7.65549	3.52903	2.62189	5.13496	8.49211	5.23539	2.28435	4.73534	8.35479	5.82757	3.03245	4.332
ENSMUSG00000015355	13.6715	6.51577	5.7108	2.92809	5.82757	2.01122	3.53443	7.07572	14.0089	4.59329	11.4694	7.86567	10.2699	8.63268	3.58896	8.20635	8.54956	6.51577	2.92809	7.07572	9.0678
ENSMUSG00000015357	1744.63	1726.68	1689.58	761.302	2235.46	2708.1	2021.69	3343.78	2040.2	722.678	740.214	774.768	2687.64	1720.3	1901.62	2468.56	1231.32	1726.68	2235.46	2040.2	757.491
ENSMUSG00000015363	940.293	1092.79	672.242	998.477	720.288	683.813	1455.01	1206.92	1188.85	532.822	689.926	707.91	595.655	901.774	800.859	1283.59	631.578	940.293	720.288	1206.92	642.791
ENSMUSG00000015365	0	0	0	0	0	0	0	0	0	4.59329	1.76452	3.93284	3.08098	0	0	0	3.34291	0	0	0	3.50691
ENSMUSG00000015377	64.5597	86.5666	68.5296	94.6748	60.6067	68.3813	133.13	131.406	108.887	70.4305	75.8742	85.2114	44.1607	73.2186	74.5543	124.475	68.9192	68.5296	68.3813	131.406	73.1523
ENSMUSG00000015396	9.11431	9.30824	4.07914	9.76028	0	3.01682	8.247	10.1082	2.54707	4.59329	2.64677	2.62189	5.13496	7.50056	4.25904	6.96742	3.74923	9.11431	3.01682	8.247	3.62003
ENSMUSG00000015401	0.759526	0	0.815828	0.976028	0	0	0	4.04327	1.27354	0	0	0	1.02699	0.525118	0.325343	1.77227	0.256748	0.759526	0	1.27354	0
ENSMUSG00000015405	3.79763	0	0.815828	4.88014	5.82757	8.04486	0	1.01082	0	27.5598	22.0564	15.7313	13.3509	1.53782	6.25086	0.336939	19.6746	0.815828	5.82757	0	18.8939
ENSMUSG00000015437	2.27858	3.7233	1.63166	1.95206	3.49654	1.00561	0	0	3.82061	0	0	3.93284	1.02699	2.54451	2.1514	1.27354	1.23996	2.27858	1.95206	0	0.513496
ENSMUSG00000015441	0	0	0	0	0	0	0	0	0.636768	0	0	0	1.02699	0	0	0.212256	0.256748	0	0	0	0
ENSMUSG00000015443	0	0	0	0	0	0	0	0	0	0	0	0	0	0	0	0	0	0	0	0	0
ENSMUSG00000015452	2.27858	2.79247	1.63166	3.90411	4.66206	3.01682	0	3.03245	0.636768	4.59329	16.7629	3.93284	3.08098	2.23424	3.861	1.22307	7.0925	2.27858	3.90411	0.636768	4.26306
ENSMUSG00000015461	192.16	228.983	128.901	206.918	193.475	185.032	241.519	217.326	188.483	373.588	330.847	271.366	377.933	183.348	195.142	215.776	338.433	192.16	193.475	217.326	352.217
ENSMUSG00000015467	10.6334	12.1007	4.89497	5.85617	11.6551	11.0617	3.53443	11.119	1.9103	1.5311	6.17581	3.93284	5.13496	9.20968	9.52433	5.52124	4.19367	10.6334	11.0617	3.53443	4.5339
ENSMUSG00000015468	35.6977	34.4405	20.3957	57.5857	51.2826	79.443	28.2754	40.4327	36.2958	56.6506	67.0516	79.9676	53.4036	30.178	62.7704	35.0013	64.2684	34.4405	57.5857	36.2958	61.8511
ENSMUSG00000015474	206.591	213.159	219.458	261.576	162.006	221.234	147.268	149.601	134.358	185.263	213.506	140.271	176.643	213.069	214.939	143.742	178.921	213.159	221.234	147.268	180.953
ENSMUSG00000015476	3.79763	4.65412	8.97411	4.88014	3.49654	5.02804	3.53443	3.03245	1.9103	12.2488	12.3516	3.93284	5.13496	5.80862	4.46824	2.82573	8.41705	4.65412	4.88014	3.03245	8.69187
ENSMUSG00000015478	834.719	1192.39	891.7	530.959	416.089	342.912	406.46	1098.76	385.881	1247.84	1872.15	1206.07	1018.78	972.935	429.987	630.367	1336.21	891.7	416.089	406.46	1226.96
ENSMUSG00000015484	0	0	0	0	0	0	0	0	0	0	0	0	0	0	0	0	0	0	0	0	0
ENSMUSG00000015488	170.134	308.103	217.01	468.494	365.972	437.439	309.852	286.061	429.182	114.832	113.811	120.607	136.59	231.749	423.968	341.698	121.46	217.01	437.439	309.852	117.72
ENSMUSG00000015501	76.7121	52.1261	58.7396	85.8905	124.71	119.667	44.7695	52.5625	58.5827	101.052	118.223	158.624	116.05	62.526	110.089	51.9715	123.487	58.7396	119.667	52.5625	117.136
ENSMUSG00000015519	0.759526	0	0	0	0	0	0	0	0	0	0	0	5.13496	0.253175	0	0	1.28374	0	0	0	0
ENSMUSG00000015522	481.539	426.317	378.544	429.452	477.861	458.557	184.969	295.159	262.985	229.665	230.269	216.306	230.046	428.8	455.29	247.704	226.572	426.317	458.557	262.985	229.855
ENSMUSG00000015533	0	0	0	0	4.66206	2.01122	3.53443	15.1623	3.18384	29.0909	26.4677	11.7985	10.2699	0	2.22442	7.29351	19.4068	0	2.01122	3.53443	19.1331
ENSMUSG00000015536	915.988	990.397	976.546	907.706	979.032	1173.54	769.328	688.367	1049.39	600.19	495.829	806.231	1001.32	960.977	1020.09	835.696	725.892	976.546	979.032	769.328	703.211
ENSMUSG00000015542	140.512	167.548	124.006	88.8186	76.9239	91.5103	227.382	142.525	164.923	194.449	151.748	169.112	158.157	144.022	85.751	178.277	168.367	140.512	88.8186	164.923	163.634
ENSMUSG00000015568	15.95	11.1699	14.6849	18.5445	11.6551	11.0617	3.53443	59.6382	17.1927	0	0.882258	1.31095	9.24293	13.9349	13.7538	26.7885	2.85903	14.6849	11.6551	17.1927	1.0966
ENSMUSG00000015575	255.96	324.858	262.697	310.377	303.034	299.671	174.365	254.726	290.366	583.348	472.89	511.269	567.927	281.171	304.361	239.819	533.858	262.697	303.034	254.726	539.598
ENSMUSG00000015579	0	0	0	0	0	0	0	0	0	0	0	0	0	0	0	0	0	0	0	0	0
ENSMUSG00000015597	78.2312	48.4028	63.6346	55.6336	155.013	165.925	23.5629	42.4543	36.2958	33.6842	22.0564	55.0597	64.7005	63.4229	125.524	34.1043	43.8752	63.6346	155.013	36.2958	44.3719
ENSMUSG00000015599	12.1524	18.6165	15.5007	17.5685	11.6551	14.0785	594.962	519.56	376.33	7.65549	3.52903	1.31095	2.05398	15.4232	14.4341	496.951	3.63736	15.5007	14.0785	519.56	2.79151
ENSMUSG00000015605	190.641	192.681	145.217	198.134	114.22	153.858	270.973	220.358	134.995	202.105	201.155	156.002	132.482	176.18	155.404	208.775	172.936	190.641	153.858	220.358	178.579
ENSMUSG00000015619	0.759526	0	2.44748	0	3.49654	0	0	1.01082	1.27354	4.59329	0.882258	2.62189	2.05398	1.069	1.16551	0.761451	2.53786	0.759526	0	1.01082	2.33794
ENSMUSG00000015627	2.27858	0.930824	0	4.88014	2.33103	0	2.35629	1.01082	0	0	0	1.31095	0	1.0698	2.40372	1.12237	0.327736	0.930824	2.33103	1.01082	0
ENSMUSG00000015647	44.812	38.1638	31.8173	53.6816	44.2895	46.258	18.8503	53.5733	31.2016	13.7799	20.2919	11.7985	11.2969	38.2644	48.0764	34.5418	14.2918	38.1638	46.258	31.2016	12.7892
ENSMUSG00000015652	1.51905	2.79247	1.63166	0	0	0	0	1.01082	0	0	0	0	0	1.98106	0	0.336939	0	1.63166	0	0	0
ENSMUSG00000015653	19.7477	16.7548	14.6849	0.976028	1.16551	2.01122	0	1.01082	1.27354	12.2488	11.4694	14.4204	7.18895	17.0625	1.38425	0.761451	11.3319	16.7548	1.16551	1.01082	11.8591
ENSMUSG00000015656	1272.97	1406.47	1239.24	956.508	1762.26	2466.76	182.612	262.813	187.21	826.793	653.753	1232.29	657.275	1306.23	1728.51	210.878	842.527	1272.97	1762.26	187.21	742.034
ENSMUSG00000015659	25.8239	28.8555	30.1856	61.4898	88.5791	92.5159	34.1662	38.4111	40.1164	27.5598	53.8177	73.4129	52.3766	28.2884	80.8616	37.5645	51.7918	28.8555	88.5791	38.4111	53.0972
ENSMUSG00000015665	0	0	0	0	2.33103	0	0	4.04327	1.9103	0	0.882258	0	1.02699	0	0.77701	1.98452	0.477313	0	0	1.9103	0.441129
ENSMUSG00000015668	126.081	141.485	163.166	138.596	135.2	158.886	147.268	171.839	201.219	711.96	711.1	336.913	441.607	143.577	144.227	173.442	550.395	141.485	138.596	171.839	576.353
ENSMUSG00000015671	233.934	298.794	237.406	181.541	215.62	180.004	221.491	203.174	285.272	566.506	607.876	561.084	733.272	256.711	192.388	236.646	617.185	237.406	181.541	221.491	587.191
ENSMUSG00000015672	187.603	202.92	186.009	94.6748	99.0687	120.673	75.4012	124.331	103.156	168.421	181.745	229.415	197.182	192.177	104.805	100.963	194.191	187.603	99.0687	103.156	189.464
ENSMUSG00000015697	233.174	273.662	330.41	283.048	293.71	283.581	118.992	189.023	185.936	301.626	360.843	330.358	310.152	279.082	286.78	164.651	325.745	273.662	283.581	185.936	320.255
ENSMUSG00000015702	18.2286	19.5473	27.7382	33.185	34.9654	45.2524	25.9192	13.1406	29.9281	36.7463	32.6435	17.0423	18.4859	21.838	37.8009	22.996	26.2295	19.5473	34.9654	25.9192	25.5647
ENSMUSG00000015709	0.759526	0	0	0	0	0	7.06886	1.01082	1.27354	19.9043	26.4677	9.17662	25.6748	0.253175	0	3.11774	20.3059	0	0	1.27354	22.7895
ENSMUSG00000015711	227.858	230.844	236.59	148.356	139.862	115.645	302.783	287.072	354.043	209.76	293.792	211.062	252.64	231.764	134.621	314.633	241.814	230.844	139.862	302.783	231.851
ENSMUSG00000015714	4084.73	4369.29	4781.57	3461.97	3116.59	2811.68	3739.43	3024.37	5029.19	6557.69	6643.4	6892.95	7278.29	4411.86	3130.08	3931	6843.08	4369.29	3116.59	3739.43	6768.18
ENSMUSG00000015721	0	0	0	0	0	0	0	0	0	0	0	0	0	0	0	0	0	0	0	0	0
ENSMUSG00000015733	860.543	834.018	940.65	475.326	621.219	572.191	428.844	644.902	678.795	413.396	443.776	644.985	635.708	878.404	556.245	584.18	534.466	860.543	572.191	644.902	539.742
ENSMUSG00000015745	44.812	43.7487	48.1339	55.6336	23.3103	24.1346	28.2754	25.2704	9.55152	41.3396	62.6403	26.2189	35.9447	45.5649	34.3595	21.0325	41.5359	44.812	24.1346	25.2704	38.6422
ENSMUSG00000015747	112.41	81.9125	90.5569	58.5617	79.255	74.415	116.636	96.0277	110.161	142.392	127.927	121.918	109.888	94.9598	70.7439	107.608	125.531	90.5569	74.415	110.161	124.923
ENSMUSG00000015748	54.6859	115.422	85.6619	66.3699	89.7446	100.561	77.7575	67.7248	97.4255	79.6171	98.8129	82.5895	58.5386	85.2567	85.5584	80.9693	79.8895	85.6619	89.7446	77.7575	81.1033
ENSMUSG00000015749	243.048	262.492	223.537	224.487	329.841	374.086	169.653	227.434	246.429	186.794	218.8	267.433	294.747	243.026	309.471	214.505	241.943	243.048	329.841	227.434	243.116
ENSMUSG00000015750	107.093	139.624	83.2145	157.141	134.034	99.5552	159.049	136.46	150.277	580.286	567.292	637.119	492.956	109.977	130.243	148.596	569.413	107.093	134.034	150.277	573.789
ENSMUSG00000015755	833.96	672.055	684.48	488.99	757.584	741.133	344.018	635.804	565.45	707.367	529.355	412.948	742.515	730.165	662.569	515.091	598.046	684.48	741.133	565.45	618.361
ENSMUSG00000015757	143.55	123.8	154.192	180.565	201.634	260.452	84.8263	94.006	136.905	136.268	100.577	128.473	164.319	140.514	214.217	105.246	132.409	143.55	201.634	94.006	132.37
ENSMUSG00000015759	702.562	807.024	889.253	457.757	504.668	476.658	501.889	557.971	626.58	474.64	479.948	618.766	589.494	799.613	479.694	562.147	540.712	807.024	476.658	557.971	534.721
ENSMUSG00000015766	21.2667	14.8932	25.2907	24.4007	29.1379	15.0841	28.2754	64.6923	33.7487	19.9043	15.8806	28.8408	21.5668	20.4835	22.8742	42.2388	21.5481	21.2667	24.4007	33.7487	20.7356
ENSMUSG00000015776	270.391	295.071	294.514	368.939	311.192	362.019	348.73	329.527	417.72	445.549	494.947	486.361	412.851	286.659	347.383	365.326	459.927	294.514	362.019	348.73	465.955
ENSMUSG00000015787	0	0	0	0	0	0	0	0	0	0	0	0	0	0	0	0	0	0	0	0	0
ENSMUSG00000015790	229.377	249.461	271.671	246.935	182.986	209.166	215.6	175.882	224.779	450.143	366.137	382.796	351.231	250.169	213.029	205.421	387.577	249.461	209.166	215.6	374.466
ENSMUSG00000015804	159.5	203.85	205.589	130.788	132.869	117.656	142.555	193.066	149.64	290.909	196.744	277.92	251.613	189.647	127.104	161.754	254.296	203.85	130.788	149.64	264.767
ENSMUSG00000015806	4649.82	5685.47	5173.17	2620.64	2641.06	2490.89	2520.05	2400.69	2870.55	5204.2	5073.87	6246.65	6443.35	5169.49	2584.19	2597.1	5742.02	5173.17	2620.64	2520.05	5725.43
ENSMUSG00000015812	6.07621	7.44659	6.52662	2.92809	10.4896	9.05047	0	0	0	7.65549	4.41129	0	6.16195	6.68314	7.4894	0	4.55718	6.52662	9.05047	0	5.28662
ENSMUSG00000015829	0	0	0	0	1.16551	0	24.741	6.06491	49.0311	1.5311	0.882258	2.62189	1.02699	0	0.388505	26.6124	1.51556	0	0	24.741	1.27904
[truncated: 20,112 more rows]

## Sheet: TPM
Gene expression values
[truncated: 21,761 more rows]

[truncated: 3 more sheets: HNF4A_dep_genes, CEBPA_dep_genes, FOXA1_dep_genes]
